# Supplementary material for: Benchmarking Deep Learning Models for Predicting Anticancer Drug Potency (IC50): Insights for the Medicinal Chemist
Source: Research Square preprint supplement (doi:10.21203/rs.3.rs-7023097/v1), 2025-07-15
Supplement: Supplementary file 1 [file 526bf298d8ea3573280ea123.xlsx]

## Sheet: EVAPA_Derivation
Drug	Assay	Target	pIC50		ΔpIC50	ΔpIC50<2.5
DOXORUBICIN	Resazurin	ADR5000 cell line	5.793		-1.455	-1.455	σ(ΔpIC50)	0.733754
DOXORUBICIN	Resazurin	ADR5000 cell line	4.522		1.458	1.458	σ(pIC50)	0.518843
DOXORUBICIN	Resazurin	CCRF-CEM	8.523		2.913	0.673	90% of IC50 values lie	0.853496
DOXORUBICIN	Resazurin	CCRF-CEM	8.523		2.753	2.256	Factor	7.12853
DOXORUBICIN	Resazurin	CCRF-CEM	7.699		0.673	-0.12
DOXORUBICIN	Resazurin	HepG2	6.377		2.256	-0.234
DOXORUBICIN	Resazurin	HepG2	7.398		-0.12	-1.201
DOXORUBICIN	Resazurin	HepG2	6.155		-0.234	1.337
DOXORUBICIN	Resazurin	HL-60	7.398		-1.201	-1.045
DOXORUBICIN	Resazurin	HL-60	6.097		1.337	-0.114
DOXORUBICIN	Resazurin	K562	5.903		-1.045	-1.081
DOXORUBICIN	Resazurin	K562	6.027		-0.114	1.457
DOXORUBICIN	Resazurin	K562	6.155		-1.081	-0.925
DOXORUBICIN	Resazurin	KB	5.87		1.457	-0.967
DOXORUBICIN	Resazurin	KB	6.046		-0.925	1.571
DOXORUBICIN	Resazurin	KB	6.018		-0.967	-0.811
DOXORUBICIN	Resazurin	KB	6.041		1.571	0.156
DOXORUBICIN	Resazurin	MCF7	6.398		-0.811	-2.382
DOXORUBICIN	Resazurin	MCF7	6.377		2.538	0.051
DOXORUBICIN	Resazurin	MCF7	6.62		0.156	1.271
DOXORUBICIN	Resazurin	MCF7	6.456		-2.382	0
DOXORUBICIN	Resazurin	MCF7	6.495		0.051	0.824
DOXORUBICIN	Resazurin	MCF7	6.377		2.957	0.824
DOXORUBICIN	Resazurin	MCF7	5.047		1.271	1.301
DOXORUBICIN	Resazurin	MCF7	5.796		0	-1.021
DOXORUBICIN	Resazurin	MCF7	6.495		0.824	0.222
DOXORUBICIN	Resazurin	MCF7	6.745		0.824	1.243
DOXORUBICIN	Resazurin	MCF7	6.523		1.301	-0.124
DOXORUBICIN	Resazurin	MCF7	4.747		-1.021	-0.252
DOXORUBICIN	Resazurin	MCF7	4.939		0.222	-0.128
DOXORUBICIN	Resazurin	MDA-MB-231	6.301		1.243	-0.176
DOXORUBICIN	Resazurin	MDA-MB-231	6.237		-0.124	-0.148
DOXORUBICIN	Resazurin	MDA-MB-231	6.77		-0.252	-0.171
DOXORUBICIN	Resazurin	MDA-MB-231	6.167		-0.128	0.028
DOXORUBICIN	Resazurin	MDA-MB-231	6.237		-0.176	0.005
DOXORUBICIN	Resazurin	MDA-MB-231	6.155		-0.148	-0.023
DOXORUBICIN	Resazurin	MRC5	5.62		-0.171	0.021
DOXORUBICIN	Resazurin	MRC5	6.83		0.028	-0.222
DOXORUBICIN	Resazurin	NCI-H460	6.523		0.005	-0.058
DOXORUBICIN	Resazurin	NCI-H460	6.377		-0.023	-0.097
DOXORUBICIN	Resazurin	NCI-H460	7.301		0.021	0.021
DOXORUBICIN	Resazurin	NCI-H460	7.301		-0.222	1.351
DOXORUBICIN	Resazurin	NCI-H460	6.377		-0.058	0.602
DOXORUBICIN	Resazurin	NCI-H460	7.301		-0.097	-0.097
DOXORUBICIN	Resazurin	NCI-H460	7		0.021	-0.347
DOXORUBICIN	Resazurin	NFF	6.901		1.351	-0.125
DOXORUBICIN	Resazurin	PBMC	6.377		0.602	1.651
DOXORUBICIN	Resazurin	PBMC	5.752		-0.097	1.459
DOXORUBICIN	Resazurin	PBMC	6.301		-0.347	-0.243
DOXORUBICIN	Resazurin	PBMC	5.78		-0.125	-0.079
DOXORUBICIN	Resazurin	PBMC	6.377		1.651	-0.118
DOXORUBICIN	Resazurin	PBMC	5.029		1.459	0
DOXORUBICIN	Resazurin	PBMC	6.42		-0.243	1.33
DOXORUBICIN	Resazurin	PBMC	5.77		-0.079	0.581
DOXORUBICIN	Resazurin	PC-3	6.523		-0.118	-0.118
DOXORUBICIN	Resazurin	PC-3	6.602		0	-0.368
DOXORUBICIN	Resazurin	PC-3	8		1.33	-0.146
DOXORUBICIN	Resazurin	PC-3M	6.62		0.581	1.63
DOXORUBICIN	Resazurin	PC-3M	6.602		-0.118	1.438
DOXORUBICIN	Resazurin	PC-3M	6.523		-0.368	0.164
DOXORUBICIN	Resazurin	SF-268	6.222		-0.146	0.125
DOXORUBICIN	Resazurin	SF-268	6.208		1.63	0.243
DOXORUBICIN	Resazurin	SF-268	6.509		1.438	1.573
DOXORUBICIN	Resazurin	SF-268	6.347		0.164	0.824
DOXORUBICIN	Resazurin	SF-268	6.208		0.125	0.125
DOXORUBICIN	Resazurin	SF-268	6.347		0.243	-0.125
DOXORUBICIN	Resazurin	SF-268	6.301		1.573	0.097
DOXORUBICIN	Resazurin	WI-38	6.097		0.824	1.873
DOXORUBICIN	Resazurin	WI-38	6.097		0.125	1.681
VORINOSTAT	Resazurin	A549	5.745		-0.125	-0.039
VORINOSTAT	Resazurin	A549	5.745		0.097	0.079
VORINOSTAT	Resazurin	A549	5.658		1.873	1.409
VORINOSTAT	Resazurin	HCT-116	6		1.681	0.66
VORINOSTAT	Resazurin	HCT-116	6		-0.039	-0.039
VORINOSTAT	Resazurin	HCT-116	6		0.079	-0.289
VORINOSTAT	Resazurin	HeLa	6.337		1.409	-0.067
VORINOSTAT	Resazurin	HeLa	5.658		0.66	1.709
VORINOSTAT	Resazurin	HeLa	6.337		-0.039	1.517
VORINOSTAT	Resazurin	K562	6.77		-0.289	0.118
VORINOSTAT	Resazurin	K562	6.174		-0.067	1.448
VORINOSTAT	Resazurin	MDA-MB-231	6.697		1.709	0.699
VORINOSTAT	Resazurin	MDA-MB-231	5.553		1.517	0
VORINOSTAT	Resazurin	MV4-11	6.143		0.118	-0.25
VORINOSTAT	Resazurin	MV4-11	6.509		1.448	-0.028
VORINOSTAT	Resazurin	MV4-11	6.42		0.699	1.748
PACLITAXEL	Resazurin	DG-75	8		0	1.556
PACLITAXEL	Resazurin	DG-75	8		-0.25	1.33
PACLITAXEL	Resazurin	MDA-MB-231	8.42		-0.028	0.581
PACLITAXEL	Resazurin	MDA-MB-231	9.699		1.748	-0.118
PACLITAXEL	Resazurin	MDA-MB-435	9.398		1.556	-0.368
PACLITAXEL	Resazurin	MDA-MB-435	8.721		1.33	-0.146
PACLITAXEL	Resazurin	MRC5	9.284		0.581	1.63
PACLITAXEL	Resazurin	MRC5	9.284		-0.118	1.438
PACLITAXEL	Resazurin	OVCAR-3	8.292		-0.368	-0.749
PACLITAXEL	Resazurin	OVCAR-3	8.31		-0.146	-1.448
PACLITAXEL	Resazurin	OVCAR-3	8.585		1.63	-1.698
PACLITAXEL	Resazurin	OVCAR-5	8.137		1.438	-1.476
PACLITAXEL	Resazurin	OVCAR-5	8.444		-0.749	0.3
DOXORUBICIN	CellTiter-Glo	A549	5.504		-1.448	0.108
DOXORUBICIN	CellTiter-Glo	A549	6.959		-1.698	-0.699
DOXORUBICIN	CellTiter-Glo	A549	4.046		-1.476	-0.949
DOXORUBICIN	CellTiter-Glo	HCT-116	7		0.3	-0.727
DOXORUBICIN	CellTiter-Glo	HCT-116	4.247		0.108	1.049
DOXORUBICIN	CellTiter-Glo	Hs-578T	6.263		-0.699	0.857
DOXORUBICIN	CellTiter-Glo	Hs-578T	4.007		-0.949	-0.25
DOXORUBICIN	CellTiter-Glo	HT-29	5.561		-0.727	-0.028
DOXORUBICIN	CellTiter-Glo	HT-29	4.888		1.049	1.748
DOXORUBICIN	CellTiter-Glo	MCF7	5.812		0.857	1.556
DOXORUBICIN	CellTiter-Glo	MCF7	5.932		-0.25	0.222
DOXORUBICIN	CellTiter-Glo	MCF7	6.046		-0.028	1.998
DOXORUBICIN	CellTiter-Glo	MCF7	7.013		1.748	1.806
DOXORUBICIN	CellTiter-Glo	MCF7	4.475		1.556	1.776
DOXORUBICIN	CellTiter-Glo	MCF7	6.857		0.222	1.584
DOXORUBICIN	CellTiter-Glo	MDA-MB-231	6.796		1.998	-0.192
DOXORUBICIN	CellTiter-Glo	MDA-MB-231	6.745		1.806	0.064
DOXORUBICIN	CellTiter-Glo	U-87MG ATCC	6.959		1.776	-0.469
DOXORUBICIN	CellTiter-Glo	U-87MG ATCC	4.002		1.584	0.134
VORINOSTAT	CellTiter-Glo	A549	5.967		-0.192	0.064
VORINOSTAT	CellTiter-Glo	A549	5.967		0.064	0.146
VORINOSTAT	CellTiter-Glo	A549	5.967		-0.469	-0.533
VORINOSTAT	CellTiter-Glo	A549	5.644		0.134	0.07
VORINOSTAT	CellTiter-Glo	A549	5.903		0.064	0
VORINOSTAT	CellTiter-Glo	A549	5.385		0.146	0.082
VORINOSTAT	CellTiter-Glo	A549	5.91		-0.533	0.603
VORINOSTAT	CellTiter-Glo	HCT-116	5.857		0.07	0.533
VORINOSTAT	CellTiter-Glo	HCT-116	6.119		0	0.615
VORINOSTAT	CellTiter-Glo	HCT-116	6.119		0.082	-0.07
VORINOSTAT	CellTiter-Glo	HCT-116	5.516		0.603	0.012
VORINOSTAT	CellTiter-Glo	HCT-116	5.733		0.533	0.082
VORINOSTAT	CellTiter-Glo	HCT-116	6.155		0.615	-1.21
VORINOSTAT	CellTiter-Glo	K562	6.19		-0.07	0.146
VORINOSTAT	CellTiter-Glo	K562	6.187		0.012	-0.778
VORINOSTAT	CellTiter-Glo	K562	6.194		0.082	-0.778
VORINOSTAT	CellTiter-Glo	K562	6.268		-1.21	0.146
VORINOSTAT	CellTiter-Glo	MGC-803	5.812		0.146	-0.778
VORINOSTAT	CellTiter-Glo	MGC-803	5.55		-0.778	-0.477
					-0.778	-0.924
					0.146	-0.924
					-0.778	0
					-0.477	-0.924
					-0.924	-0.623
					-0.924	0
					0	0.924
					-0.924	0
					-0.623	0.301
					0	0.924
					0.924	0
					0	0.301
					0.301	-0.924
					0.924	-0.623
					0	0.301
					0.301	0.625
					-0.924	0.076
					-0.623	0.597
					0.301	0
					0.625	1.348
					0.076	-0.043
					0.597	0.607
					0	-0.549
					1.348	-0.028
					-0.043	-0.625
					0.607	0.723
					-0.549	-0.668
					-0.028	-0.018
					-0.625	0.521
					0.723	-0.076
					-0.668	1.272
					-0.018	-0.119
					0.521	0.531
					-0.076	-0.597
					1.272	0.751
					-0.119	-0.64
					0.531	0.01
					-0.597	1.348
					0.751	-0.043
					-0.64	0.607
					0.01	-1.391
					1.348	-0.741
					-0.043	0.65
					0.607	-0.079
					-1.391	-1.477
					-0.741	-1.398
					0.65	0.018
					-0.079	0.097
					-1.477	0.079
					-1.398	0.014
					0.018	-0.287
					0.097	-0.125
					0.079	0.014
					0.014	-0.125
					-0.287	-0.079
					-0.125	-0.301
					0.014	-0.139
					-0.125	0
					-0.079	-0.139
					-0.301	-0.093
					-0.139	0.162
					0	0.301
					-0.139	0.162
					-0.093	0.208
					0.162	0.139
					0.301	0
					0.162	0.046
					0.208	-0.139
					0.139	-0.093
					0	0.046
					0.046	0
					-0.139	0
					-0.093	-1.279
					0.046	0.677
					0	0
					0	-0.018
					-1.279	-0.293
					0.677	-0.275
					0	-0.307
					-0.018	0
					-0.293	0
					-0.275	0.323
					-0.307	0.064
					0	0.582
					0	0.057
					0.323	0
					0.064	0.323
					0.582	0.064
					0.057	0.582
					0	0.057
					0.323	0.323
					0.064	0.064
					0.582	0.582
					0.057	0.057
					0.323	-0.259
					0.064	0.259
					0.582	-0.266
					0.057	0.518
					-0.259	-0.007
					0.259	-0.525
					-0.266	-0.262
					0.518	-0.262
					-0.007	0.341
					-0.525	0.124
					-0.262	-0.298
					-0.262	0
					0.341	0.603
					0.124	0.386
					-0.298	-0.036
					0	0.603
					0.603	0.386
					0.386	-0.036
					-0.036	-0.217
					0.603	-0.639
					0.386	-0.422
					-0.036	0.003
					-0.217	-0.004
					-0.639	-0.078
					-0.422	-0.007
					0.003	-0.081
					-0.004	-0.074
					-0.078	0.262
					-0.007	0
					-0.081	0.087
					-0.074	0.087
					0.262	0
					0	0
					0.087	0
					0.087	0.679
					0	0
					0	-0.679
					0	0.596
					0.679	1.144
					0	-0.366
					-0.679	-0.277
					0.596	0.089
					1.144
					-0.366
					-0.277
					0.089

## Sheet: Novel_cmpnds_from_lit
No.	Cmpd code in paper	SMILES	Cell line (1)	IC50 (μM)(1)	Cell line (2)	IC50 (μM)(2)	Paper details
1	2	ClC1=CC(NC(CC2=CC=C(S(CC)(=O)=O)C=C2)=O)=CC(Cl)=C1C3=C(OC(F)(F)F)C=CC=C3	22RV1	13.32 ± 1.06	LNCaP	7.68 ± 0.44	Discovery of the First-in-Class RORγ Covalent Inhibitors for Treatment of Castration-Resistant Prostate Cancer. (https://doi.org/10.1021/acs.jmedchem.3c02063) Cell Viability Assay: 4 days of incubation, CCK-8 reagents (WST-8)
2	8	C=CC(NC1=C(C2=CC=C(NC(CC3=CC=C(S(CC)(=O)=O)C=C3)=O)C=C2C)C=CC=C1)=O	22RV1	2.25 ± 0.10	LNCaP	0.92 ± 0.12
3	27	C=CC(NC1=C(C2=CC=C(NC(CC3=CC=C(S(CC)(=O)=O)C=C3)=O)C=C2C(F)(F)F)C=CC=C1)=O	22RV1	2.56 ± 0.32	LNCaP	1.77 ± 0.08
4	28	C=CC(NC1=C(C2=CC=C(NC(CC3=CC=C(S(CC)(=O)=O)C=C3)=O)C=C2F)C=CC=C1)=O	22RV1	1.44 ± 0.14	LNCaP	0.53 ± 0.05
5	29	C=CC(NC1=C(C2=CC=C(NC(CC3=CC=C(S(CC)(=O)=O)C=C3)=O)C=C2Cl)C=CC=C1)=O	22RV1	0.77 ± 0.07	LNCaP	0.63 ± 0.07
6	30	C=CC(NC1=C(C2=C(Cl)C=C(NC(CC3=CC=C(S(CC)(=O)=O)C=C3)=O)C=C2Cl)C=CC=C1)=O	22RV1	0.92 ± 0.20	LNCaP	0.70 ± 0.06
7	2d	O=C(NCCCCC1=CC=CS1)C2=CC(N3C(C4=CC=C(OC)C=C4)=NC(CC)=N3)=CC=C2	MKN45	0.76 ± 0.11			Discovery of a Highly Potent and Selective MYOF Inhibitor with Improved Water Solubility for the Treatment of Gastric Cancer. (https://doi.org/10.1021/acs.jmedchem.3c01639) Cell Viability Assay: 48 h incubation, sulforhodamine B (SRB) assay
8	2e	O=C(NCCCCN1C=CC=N1)C2=CC(N3C(C4=CC=C(OC)C=C4)=NC(CC)=N3)=CC=C2	MKN45	0.54 ± 0.02
9	HJ445A (2i)	O=C(NCCCCN1N=CC=N1)C2=CC(N3C(C4=CC=C(OC)C=C4)=NC(CC)=N3)=CC=C2	MKN45	0.14 ± 0.03
10	2j	O=C(NCCCCN1N=CN=N1)C2=CC(N3C(C4=CC=C(OC)C=C4)=NC(CC)=N3)=CC=C2	MKN45	2.86 ± 0.21
11	2l	O=C(NCCCCN1C=C(F)C=N1)C2=CC(N3C(C4=CC=C(OC)C=C4)=NC(CC)=N3)=CC=C2	MKN45	5.91 ± 0.57
12	2o	O=C(NCCCCN1N=C(Br)C=N1)C2=CC(N3C(C4=CC=C(OC)C=C4)=NC(CC)=N3)=CC=C2	MKN45	0.26 ± 0.21
13	3b	O=C(NCCCCCN1N=CC=N1)C2=CC(N3C(C4=CC=C(OC)C=C4)=NC(CC)=N3)=CC=C2	MKN45	6.61 ± 0.80
14	4b	O=C(NCCCCN1N=CC=N1)C2=CC(N3C(C4=CC(OC)=CC=C4)=NC(CC)=N3)=CC=C2	MKN45	9.14 ± 0.83
15	4c	O=C(NCCCCN1N=CC=N1)C2=CC(N3C(C4=NC=C(OC)C=C4)=NC(CC)=N3)=CC=C2	MKN45	0.25 ± 0.04
16	4e	O=C(NCCCCN1N=CC=N1)C2=CC(N3C(C4=NC=C(OC)C=N4)=NC(CC)=N3)=CC=C2	MKN45	0.50 ± 0.02
17	4f	O=C(NCCCCN1N=CC=N1)C2=CC(N3C(C4=CC=CC=C4)=NC(CC)=N3)=CC=C2	MKN45	3.12 ± 0.27
18	4g	O=C(NCCCCN1N=CC=N1)C2=CC(N3C(C4=CC=C(O)C=C4)=NC(CC)=N3)=CC=C2	MKN45	0.49 ± 0.01
19	4h	O=C(NCCCCN1N=CC=N1)C2=CC(N3C(C4=CC=C(C)C=C4)=NC(CC)=N3)=CC=C2	MKN45	0.30 ± 0.04
20	4j	O=C(NCCCCN1N=CC=N1)C2=CC(N3C(C4=CC=C(CCC)C=C4)=NC(CC)=N3)=CC=C2	MKN45	1.97 ± 0.21
21	4k	O=C(NCCCCN1N=CC=N1)C2=CC(N3C(C4=CC=C(F)C=C4)=NC(CC)=N3)=CC=C2	MKN45	0.30 ± 0.01
22	4n	O=C(NCCCCN1N=CC=N1)C2=CC(N3C(C4=CC=C(OC(F)(F)F)C=C4)=NC(CC)=N3)=CC=C2	MKN45	5.14 ± 0.44
23	4p	O=C(NCCCCN1N=CC=N1)C2=CC(N3C(C4=CC=C([N+]([O-])=O)C=C4)=NC(CC)=N3)=CC=C2	MKN45	0.88 ± 0.23
24	A2	O=S(C1=CC=C(CN(C2=CC=CC=C2)C)C=C1)(N(C#C)C)=O	AsPC-1	0.172 ± 0.006
25	A3	O=S(C1=CC=C(CN(C2=CC=C(F)C=C2)C)C=C1)(N(C#C)C)=O	AsPC-1	0.188 ± 0.007			Novel Covalent Probe Selectively Targeting Glutathione Peroxidase 4 In Vivo: Potential Applications in Pancreatic Cancer Therapy. (https://doi.org/10.1021/acs.jmedchem.3c01608) Cell viability: incubated for 72 h, Cell Counting Kit 8 (CCK8, CK04, Dojindo Laboratories, Kumamoto, Japan)
26	A6	O=S(C1=CC=C(CN(C2=CC=C(C(F)(F)F)C=C2)C)C=C1)(N(C#C)C)=O	AsPC-1	0.085 ± 0.009
27	A8	O=S(C1=CC=C(CN(C2=CC=C(C3=NC(C=CC=C4)=C4S3)C=C2)C)C=C1)(N(C#C)C)=O	AsPC-1	0.028 ± 0.004
28	A11	O=S(C1=CC=C(CN(C2=CC=C(OC)C=C2)C)C=C1)(N(C#C)C)=O	AsPC-1	0.578 ± 0.680
29	A12	O=S(C1=CC=C(CN(C2=CC=C(OCC)C=C2)C)C=C1)(N(C#C)C)=O	AsPC-1	0.140 ± 0.096
30	A19	O=S(C1=CC=C(CN(C2=CC=C(C3=NC4=C(C=CC=C4)N3C)C=C2)C)C=C1)(N(C#C)C)=O	AsPC-1	0.273 ± 0.007
31	A20	O=S(C1=CC=C(CN(C2=CC=C(C#C)C=C2)C)C=C1)(N(C#C)C)=O	AsPC-1	0.121 ± 0.005
32	A13	O=S(C1=CC=C(CN(C2=CC=C(C#C)C=C2)CC)C=C1)(N(C#C)C)=O	AsPC-1	0.098 ± 0.010
33	A15	O=S(C1=CC=C(CN(C2=CC=C(C#C)C=C2)CC#C)C=C1)(N(C#C)C)=O	AsPC-1	0.266 ± 0.036
34	A16	O=S(C1=CC=C(CN(C2=CC=C(C3=NC(C=CC=C4)=C4S3)C=C2)CC#C)C=C1)(N(C#C)C)=O	AsPC-1	0.022 ± 0.001
35	A14	O=S(C1=CC(CN(C)C2=CC=C(C(F)(F)F)C=C2)=CC=C1)(N(C#C)C)=O	AsPC-1	0.250 ± 0.043
36	3a	ClC1=CC2=C(C=C1)SC3=CC=CC=C3N2CCCN4CCN(CCOC(CCC(N(CCS(C)(=O)=O)CC5=CC=C(C6=CC(C(NC7=CC(Cl)=C(OCC8=CC(F)=CC=C8)C=C7)=NC=N9)=C9C=C6)O5)=O)=O)CC4	MDA-MB-231	1.54 ± 0.41
37	3b	ClC1=CC2=C(C=C1)SC3=CC=CC=C3N2CCCN4CCN(CCOC(CCCC(N(CCS(C)(=O)=O)CC5=CC=C(C6=CC(C(NC7=CC(Cl)=C(OCC8=CC(F)=CC=C8)C=C7)=NC=N9)=C9C=C6)O5)=O)=O)CC4	MDA-MB-231	4.51 ± 0.38			Conjugates Derived from Lapatinib Derivatives with Cancer Cell Stemness Inhibitors Effectively Reversed Drug Resistance in Triple-Negative Breast Cancer (https://doi.org/10.1021/acs.jmedchem.1c01013) Cell viability: 72 h incubation, MTT method
38	4a	O=C(CCC(N(CCS(C)(=O)=O)CC1=CC=C(C2=CC(C(NC3=CC(Cl)=C(OCC4=CC(F)=CC=C4)C=C3)=NC=N5)=C5C=C2)O1)=O)OCCN(CC6)CCN6CCCN7C8=C(C=CC(C(F)(F)F)=C8)SC9=CC=CC=C97	MDA-MB-231	2.98 ± 0.87
39	4b	O=C(CCCC(N(CCS(C)(=O)=O)CC1=CC=C(C2=CC(C(NC3=CC(Cl)=C(OCC4=CC(F)=CC=C4)C=C3)=NC=N5)=C5C=C2)O1)=O)OCCN(CC6)CCN6CCCN7C8=C(C=CC(C(F)(F)F)=C8)SC9=CC=CC=C97	MDA-MB-231	6.58 ± 1.01
40	5a	O=C(CCC(N(CCS(C)(=O)=O)CC1=CC=C(C2=CC(C(NC3=CC(Cl)=C(OCC4=CC(F)=CC=C4)C=C3)=NC=N5)=C5C=C2)O1)=O)OC(C)C6=CC7=C(C(C(C=CC=C8)=C8C7=O)=O)O6	MDA-MB-231	3.61 ± 0.38
41	5b	O=C(CCCC(N(CCS(C)(=O)=O)CC1=CC=C(C2=CC(C(NC3=CC(Cl)=C(OCC4=CC(F)=CC=C4)C=C3)=NC=N5)=C5C=C2)O1)=O)OC(C)C6=CC7=C(C(C(C=CC=C8)=C8C7=O)=O)O6	MDA-MB-231	2.04 ± 1.76
42	1	CC(C1([H])OC(C(C)=C(C[H])C1)=O)(O)C2(O)CC(OC(C)=O)C3(O)C4([H])CC=C(C5(C)C4([H])CCC32COC(C)=O)CC=CC5=O	LNCaP	0.44 ± 0.14	NCI-H460	2.0 ± 0.5	Discovery of Potent 17β-Hydroxywithanolides for Castration-Resistant Prostate Cancer by High-Throughput Screening of a Natural Products Library for Androgen-Induced Gene Expression Inhibitors. (https://doi.org/10.1021/acs.jmedchem.5b00867) Cytotoxicity (Cell viability): 72 h incubation, resazurin (alamarBlue) dye reduction
43	2	CC(O)(C1(CC(C2(C3(CC=C(CC=CC4=O)C4(C3(CCC21COC(C)=O)[H])C)[H])O)OC(C)=O)O)C5(OC(C(C)=C(C5)CO)=O)[H]	LNCaP	3.3 ± 0.3	NCI-H460	> 5.0
44	3	OC(C1(COC(C)=O)CCC2([H])C(C13O)([H])CC=C4C=CCC(C42C)=O)(CC3[H])C(C5(OC(C(C)=C(C)O5)=O)[H])(C)O	LNCaP	1.1 ± 0.1	NCI-H460	3.9 ± 1.1
45	4	CC(C1([H])OC(C(C)=C(C)C1)=O)(O)C2(O)CC(OC(C)=O)C3(O)C4([H])CC=C(C5(C)C4([H])CCC32COC(C)=O)C=CCC5=O	LNCaP	2.0 ± 0.3	NCI-H460	> 5.0
46	5	CC(C1([H])OC(C(C)=C(C[H])C1)=O)(O)C2(O)CC([H])C3(O)C4([H])CC=C(C5(C)C4([H])CCC32COC(C)=O)CC=CC5=O	LNCaP	0.07 ± 0.01	NCI-H460	1.2 ± 0.1
47	6	CC(C1([H])OC(C(C)=C(C)C1)=O)(O)C2(O)CCC3(O)C4([H])CC5C(C6(C)C4([H])CCC32COC(C)=O)(O5)CC=CC6=O	LNCaP	0.02 ± 0.01	NCI-H460	0.80 ± 0.20
48	7	CC(C1([H])OC(C(C)=C(C)C1)=O)(O)C2(O)CCC3(O)C4([H])CC5C(C6(C)C4([H])CCC32COC(C)=O)(O5)CC=CC6=O	LNCaP	0.32 ± 0.08	NCI-H460	2.1 ± 0.7
49	8	CC(C1([H])OC(C(CO)=C(C)C1)=O)C2([H])CCC3C4([H])CC5C(C6(C)C4([H])CCC32C)(O5)C(O)C=CC6=O	LNCaP	0.87 ± 0.01	NCI-H460	<0.40
50	8b (isomeric)	NC1=NC(N(C=C1)[C@H]2C(F)(F)[C@H](O)[C@@H](COP(OC3=CC=CC=C3)(N[C@@H](C)C(OC(C)C)=O)=O)O2)=O	MM1S	0.500 ± 0.035	BxPC-3	>1	Design, Synthesis, and Anti-Cancer Evaluation of Novel Cyclic Phosphate Prodrug of Gemcitabine. (https://doi.org/10.1021/acs.jmedchem.3c00006) Cell Viability: 72 h incubation, resazurin assay
	8b	NC1=NC(N(C=C1)C2C(F)(F)C(O)C(COP(OC3=CC=CC=C3)(NC(C)C(OC(C)C)=O)=O)O2)=O
51	8c (isomeric)	NC1=NC(N(C=C1)[C@H]2C(F)(F)[C@H](O)[C@@H](COP(OC3=CC=CC=C3)(N[C@@H](C)C(OC)=O)=O)O2)=O	MM1S	0.111 ± 0.033	BxPC-3	>1
	8c	NC1=NC(N(C=C1)C2C(F)(F)C(O)C(COP(OC3=CC=CC=C3)(NC(C)C(OC)=O)=O)O2)=O
52	8d (isomeric)	NC1=NC(N(C=C1)[C@H]2C(F)(F)[C@H](O)[C@@H](COP(OC3=CC=CC=C3)(N[C@@H](C)C(OC4CCCCC4)=O)=O)O2)=O	MM1S	0.130 ± 0.015	BxPC-3	>1
	8d	NC1=NC(N(C=C1)C2C(F)(F)C(O)C(COP(OC3=CC=CC=C3)(NC(C)C(OC4CCCCC4)=O)=O)O2)=O
53	8e (isomeric)	NC1=NC(N(C=C1)[C@H]2C(F)(F)[C@H](O)[C@@H](COP(OCC(OC)=O)(N[C@@H](C)C(OC3=CC=CC=C3)=O)=O)O2)=O	MM1S	0.0041 ± 0.0003	BxPC-3	0.035 ± 0.007
	8e	NC1=NC(N(C=C1)C2C(F)(F)C(O)C(COP(OCC(OC)=O)(NC(C)C(OC3=CC=CC=C3)=O)=O)O2)=O
54	8f (isomeric)	NC1=NC(N(C=C1)[C@H]2C(F)(F)[C@H](O)[C@@H](COP(OCC(OC)=O)(N[C@@H](C)C(OC(C)C)=O)=O)O2)=O	MM1S	0.0047 ± 0.0003	BxPC-3	0.040 ± 0.007
	8f	NC1=NC(N(C=C1)C2C(F)(F)C(O)C(COP(OCC(OC)=O)(NC(C)C(OC(C)C)=O)=O)O2)=O
55	12b (isomeric)	O=C1N=C(NC(C(CCC)CCC)=O)C=CN1[C@H]2C(F)(F)[C@H](O)[C@@H](COP(OCC(OC)=O)(N[C@@H](C)C(OC(C)C)=O)=O)O2	MM1S	>1	BxPC-3	>1
	12b	O=C1N=C(NC(C(CCC)CCC)=O)C=CN1C2C(F)(F)C(O)C(COP(OCC(OC)=O)(NC(C)C(OC(C)C)=O)=O)O2
56	18a (isomeric)	O=C1N=C(N)C=CN1[C@H]2C(F)(F)[C@H](OP3(OCC(OC)=O)=O)[C@@H](CO3)O2	MM1S	0.0027 ± 0.0001	BxPC-3	0.031 ± 0.003
	18a	O=C1N=C(N)C=CN1C2C(F)(F)C(OP3(OCC(OC)=O)=O)C(CO3)O2
57	18b (isomeric)	O=C1N=C(N)C=CN1[C@H]2C(F)(F)[C@H](OP3(OCC(OCC)=O)=O)[C@@H](CO3)O2	MM1S	0.0039 ± 0.0002	BxPC-3	0.023 ± 0.009
	18b	O=C1N=C(N)C=CN1C2C(F)(F)C(OP3(OCC(OCC)=O)=O)C(CO3)O2
58	18c (isomeric)	O=C1N=C(N)C=CN1[C@H]2C(F)(F)[C@H](OP3(OCC(OCC4=CC=CC=C4)=O)=O)[C@@H](CO3)O2	MM1S	0.0036 ± 0.0003	BxPC-3	0.017 ± 0.003
	18c	O=C1N=C(N)C=CN1C2C(F)(F)C(OP3(OCC(OCC4=CC=CC=C4)=O)=O)C(CO3)O2
59	18d (isomeric)	O=C1N=C(N)C=CN1[C@H]2C(F)(F)[C@H](OP3(OCC(OC(C)C)=O)=O)[C@@H](CO3)O2	MM1S	0.0054 ± 0.0004	BxPC-3	0.047 ± 0.009
	18d	O=C1N=C(N)C=CN1C2C(F)(F)C(OP3(OCC(OC(C)C)=O)=O)C(CO3)O2
60	NUC-1031 (isomeric)	NC1=NC(N(C=C1)[C@H]2C(F)(F)[C@H](O)[C@@H](COP(OC3=CC=CC=C3)(N[C@@H](C)C(OCC4=CC=CC=C4)=O)=O)O2)=O	MM1S	0.031 ± 0.002	BxPC-3	0.230 ± 0.090
	NUC-1031	NC1=NC(N(C=C1)C2C(F)(F)C(O)C(COP(OC3=CC=CC=C3)(NC(C)C(OCC4=CC=CC=C4)=O)=O)O2)=O
61	12a	NC(C1=CC=CC2=C1N=C(C(C=C3F)=CC=C3NC4=NC=CC(N(C5=CC6=NN(C)C(C)=C6C=C5)C)=N4)N2)=O	MDA-MB-231	9.340 ± 0.820	MCF7	>10	Discovery, Synthesis, and Evaluation of Novel Dual Inhibitors of a Vascular Endothelial Growth Factor Receptor and Poly(ADP-Ribose) Polymerase for BRCA Wild-Type Breast Cancer Therapy (https://doi.org/10.1021/acs.jmedchem.3c00640) Cell Viability: 48 h incubation, cell-counting kit 8 (CCK8)
62	12e	NC(C1=CC=CC2=C1N=C(C(C(OC)=C3)=CC=C3NC4=NC=CC(N(C5=CC6=NN(C)C(C)=C6C=C5)C)=N4)N2)=O	MDA-MB-231	8.510 ± 0.124	MCF7	6.650 ± 0.500
63	12f	CN1C(C)=C2C(C=C(N(C)C3=CC=NC(NC4=CC(C)=C(C5=NC6=C(C=CC=C6C(N)=O)N5)N=C4)=N3)C=C2)=N1	MDA-MB-231	8.910 ± 0.120	MCF7	>10
64	13c	CN(C1=CC2=NN(C)C(C)=C2C=C1)C3=NC(NC4=CC=C(C(NC5=NC6=C(C=CC=C6C(N)=O)N5)=O)C(C(F)(F)F)=C4)=NC=C3	MDA-MB-231	9.943 ± 1.200	MCF7	9.881 ± 0.405
65	14a	NC(C1=CC=CC2=C1N=C(C3=CC=CC(NC4=NC=CC(N(C5=CC6=NN(C)C(C)=C6C=C5)C)=N4)=C3)N2)=O	MDA-MB-231	9.400 ± 0.243	MCF7	>10
66	14b	NC(C1=CC=CC2=C1N=C(C3=C(C)C=CC(NC4=NC=CC(N(C5=CC6=NN(C)C(C)=C6C=C5)C)=N4)=C3)N2)=O	MDA-MB-231	4.130 ± 0.300	MCF7	3.540 ± 0.100
67	18a	CN(C1=CC2=NN(C)C(C)=C2C=C1)C3=NC(NC4=CC=C(C5=NC6=C(C=C(F)C(F)=C6)N5)C(Cl)=C4)=NC=C3	MDA-MB-231	8.700 ± 0.800	MCF7	9.600 ± 0.100
68	18b	CN(C1=CC2=NN(C)C(C)=C2C=C1)C3=NC(NC4=CC=C(C5=NC6=C(C=C(F)C(F)=C6)N5)C(C(F)(F)F)=C4)=NC=C3	MDA-MB-231	7.800 ± 0.990	MCF7	6.100 ± 0.400
69	18c	CN(C1=CC2=NN(C)C(C)=C2C=C1)C3=NC(NC4=CC=C(C5=NC6=C(C=C(F)C(F)=C6)N5)C(OC)=C4)=NC=C3	MDA-MB-231	3.400 ± 0.132	MCF7	9.900 ± 0.400
70	20a	CN(C1=CC2=NN(C)C(C)=C2C=C1)C3=NC(NC4=CC(C5=NC6=C(C=C(F)C(F)=C6)N5)=CC=C4)=NC=C3	MDA-MB-231	2.300 ± 0.417	MCF7	7.200 ± 1.431
71	20b	CN(C1=CC2=NN(C)C(C)=C2C=C1)C3=NC(NC4=CC(C5=NC6=C(C=C(F)C(F)=C6)N5)=C(C)C=C4)=NC=C3	MDA-MB-231	2.900 ± 0.157	MCF7	1.200 ± 0.247
72	20c	CN(C1=CC2=NN(C)C(C)=C2C=C1)C3=NC(NC4=CC(C5=NC6=C(C=C(F)C(F)=C6)N5)=CC=C4OC)=NC=C3	MDA-MB-231	3.300 ± 0.148	MCF7	4.200 ± 0.958
73	4	CC1=C(N)C=CC=C1C2=NC3=CC=CN=C3S2	HCC-827	10.06 ± 0.11	NCI-H1975	12.69 ± 0.18	Design and synthesis of novel Thiazolo[5,4-b]pyridine derivatives as potent and selective EGFR-TK inhibitors targeting resistance Mutations in non-small cell lung cancer. (https://doi.org/10.1016/j.ejmech.2024.116727) Cell Viability Assay: 72 h incubation, MTT reduction
74	5a	CC1=C(NS(=O)(C2=CN=CC=C2)=O)C=CC=C1C3=NC4=CC=CN=C4S3	HCC-827	2.10 ± 0.10	NCI-H1975	3.06 ± 0.08
75	5b	CC1=C(NS(=O)(C2CCOCC2)=O)C=CC=C1C3=NC4=CC=CN=C4S3	HCC-827	2.11 ± 0.14	NCI-H1975	3.12 ± 0.23
76	5c	CC1=C(NS(=O)(C2=CN(C)N=C2)=O)C=CC=C1C3=NC4=CC=CN=C4S3	HCC-827	2.18 ± 0.19	NCI-H1975	3.30 ± 0.32
77	5d	CC1=C(NS(=O)(C2=CC(F)=CC=C2F)=O)C=CC=C1C3=NC4=CC=CN=C4S3	HCC-827	1.16 ± 0.02	NCI-H1975	1.09 ± 0.29
78	5e	CC1=C(NS(=O)(C2=CC=CC=C2)=O)C=CC=C1C3=NC4=CC=CN=C4S3	HCC-827	2.20 ± 0.23	NCI-H1975	3.32 ± 0.36
79	5f	CC1=C(NS(=O)(CC2=CC=CC=C2)=O)C=CC=C1C3=NC4=CC=CN=C4S3	HCC-827	2.24 ± 0.16	NCI-H1975	3.41 ± 0.24
80	5g	CC1=C(NS(=O)(C2=CC=C(F)C=C2F)=O)C=CC=C1C3=NC4=CC=CN=C4S3	HCC-827	1.40 ± 0.20	NCI-H1975	2.11 ± 0.08
81	5h	CC1=C(NS(=O)(C2=C(OC(F)(F)F)C=CC=C2)=O)C=CC=C1C3=NC4=CC=CN=C4S3	HCC-827	1.52 ± 0.19	NCI-H1975	2.18 ± 0.37
82	5i	CC1=C(NS(=O)(C2=CC(Cl)=CC=C2)=O)C=CC=C1C3=NC4=CC=CN=C4S3	HCC-827	1.59 ± 0.36	NCI-H1975	2.21 ± 0.11
83	5j	CC1=C(NS(=O)(C2=CC(C#N)=C(F)C=C2)=O)C=CC=C1C3=NC4=CC=CN=C4S3	HCC-827	1.46 ± 0.04	NCI-H1975	2.10 ± 0.32
84	10a	CC1=C(NS(=O)(=O)C2=CC(F)=CC=C2F)C=CC=C1C1=NC2=CC(=CN=C2S1)C1=CC(=CC=C1)C(F)(F)F	HCC-827	0.092 ± 0.15	NCI-H1975	0.26 ± 0.02
85	10b	COC1=C(C2=CC3=C(SC(C4=C(C)C(NS(=O)(C5=C(F)C=CC(F)=C5)=O)=CC=C4)=N3)N=C2)C=CC=N1	HCC-827	0.040 ± 0.37	NCI-H1975	0.15 ± 0.10
86	10c	CSC1=NC=C(C=N1)C1=CN=C2SC(=NC2=C1)C1=CC=CC(NS(=O)(=O)C2=CC(F)=CC=C2F)=C1C	HCC-827	0.010 ± 0.33	NCI-H1975	0.09 ± 0.30
87	10d	COC1=CC=CC(=C1)C1=CN=C2SC(=NC2=C1)C1=CC=CC(NS(=O)(=O)C2=CC(F)=CC=C2F)=C1C	HCC-827	0.72 ± 0.35	NCI-H1975	0.34 ± 0.21
88	10e	CC1=C(NS(=O)(=O)C2=CC(F)=CC=C2F)C=CC=C1C1=NC2=CC(=CN=C2S1)C1=CC=C(N=C1)C(F)(F)F	HCC-827	0.044 ± 0.32	NCI-H1975	0.22 ± 0.16
89	10f	CC1=C(NS(=O)(=O)C2=CC(F)=CC=C2F)C=CC=C1C1=NC2=CC(=CN=C2S1)C1=NNC=C1	HCC-827	0.14 ± 0.15	NCI-H1975	0.30 ± 0.40
90	10g	CC1=C(NS(=O)(=O)C2=CC(F)=CC=C2F)C=CC=C1C1=NC2=CC(=CN=C2S1)C1=CC=CC=C1	HCC-827	0.089 ± 0.02	NCI-H1975	0.22 ± 0.23
91	10h	CC1=C(NS(=O)(=O)C2=CC(F)=CC=C2F)C=CC=C1C1=NC2=CC(=CN=C2S1)C1=CN=CN=C1	HCC-827	0.021 ± 0.37	NCI-H1975	0.11 ± 0.04
92	10i	CC1=C(NS(=O)(=O)C2=CC(F)=CC=C2F)C=CC=C1C1=NC2=CC(=CN=C2S1)C1=CC=C(N=C1)C#N	HCC-827	0.041 ± 0.20	NCI-H1975	0.12 ± 0.30
93	10j	COC1=CC(=CC=N1)C1=CN=C2SC(=NC2=C1)C1=CC=CC(NS(=O)(=O)C2=CC(F)=CC=C2F)=C1C	HCC-827	0.042 ± 0.08	NCI-H1975	0.18 ± 0.40
94	10k	CC1=C(NS(=O)(=O)C2=CC(F)=CC=C2F)C=CC=C1C1=NC2=CC(=CN=C2S1)C1=CN=C(N)N=C1	HCC-827	0.010 ± 0.22	NCI-H1975	0.08 ± 0.35
95	10l	CC1=C(NS(=O)(=O)C2=CC(F)=CC=C2F)C=CC=C1C1=NC2=CC(=CN=C2S1)C1=CC=CS1	HCC-827	0.11 ± 0.40	NCI-H1975	0.30 ± 0.19
96	10m	CC(=O)C1=CC=C(C=C1)C1=CN=C2SC(=NC2=C1)C1=CC=CC(NS(=O)(=O)C2=CC(F)=CC=C2F)=C1C	HCC-827	0.56 ± 0.02	NCI-H1975	0.36 ± 0.37
97	12a	CC1=C(NS(=O)(=O)C2=CC(F)=CC=C2F)C=CC=C1C1=NC2=CC(CN3CCOCC3)=CN=C2S1	HCC-827	0.42 ± 0.22	NCI-H1975	0.46 ± 0.08
98	12b	CC1=C(NS(=O)(=O)C2=CC(F)=CC=C2F)C=CC=C1C1=NC2=CC(CN3CCCC3)=CN=C2S1	HCC-827	0.49 ± 0.40	NCI-H1975	0.52 ± 0.20
99	12c	CN1CCN(CC2=CN=C3SC(=NC3=C2)C2=CC=CC(NS(=O)(=O)C3=CC(F)=CC=C3F)=C2C)CC1	HCC-827	0.52 ± 0.14	NCI-H1975	0.77 ± 0.22
100	13	CCC1=CN=C2SC(=NC2=C1)C1=CC=CC(NS(=O)(=O)C2=CC(F)=CC=C2F)=C1C	HCC-827	0.70 ± 0.30	NCI-H1975	0.42 ± 0.24
101	14	CC1=C(NS(=O)(=O)C2=CC(F)=CC=C2F)C=CC=C1C1=NC2=CC(=CN=C2S1)C#N	HCC-827	0.094 ± 0.24	NCI-H1975	0.28 ± 0.40
102	16a	COC1=CC=C(F)C=C1S(=O)(=O)NC1=C(C)C(=CC=C1)C1=NC2=CC(=CN=C2S1)C1=CN=CC=C1	HCC-827	6.01 ± 0.09	NCI-H1975	6.19 ± 0.33
103	16b	COC1=CC=CC(=C1)C1=CN=C2SC(=NC2=C1)C1=CC=CC(NS(=O)(=O)C2=CC(F)=CC=C2OC)=C1C	HCC-827	6.21 ± 0.30	NCI-H1975	7.10 ± 0.10
104	16c	COC1=CC=C(F)C=C1S(=O)(=O)NC1=C(C)C(=CC=C1)C1=NC2=CC(=CN=C2S1)C1=CC=CN=C1OC	HCC-827	4.40 ± 0.04	NCI-H1975	4.55 ± 0.35
105	16d	COC1=CC=C(F)C=C1S(=O)(=O)NC1=C(C)C(=CC=C1)C1=NC2=CC(=CN=C2S1)C1=CC(=CC=C1)C(F)(F)F	HCC-827	6.02 ± 0.15	NCI-H1975	6.11 ± 0.21
106	16e	COC1=CC=C(F)C=C1S(=O)(=O)NC1=C(C)C(=CC=C1)C1=NC2=CC(=CN=C2S1)C1=NNC=C1	HCC-827	5.01 ± 0.09	NCI-H1975	4.89 ± 0.37
107	16f	COC1=CC=C(F)C=C1S(=O)(=O)NC1=C(C)C(=CC=C1)C1=NC2=CC(=CN=C2S1)C1=CC=CC=C1	HCC-827	6.08 ± 0.40	NCI-H1975	6.20 ± 0.08
108	16g	COC1=CC=C(F)C=C1S(=O)(=O)NC1=C(C)C(=CC=C1)C1=NC2=CC(=CN=C2S1)C1=CN=CN=C1	HCC-827	4.33 ± 0.10	NCI-H1975	4.38 ± 0.32
109	16h	COC1=CC(=CC=N1)C1=CN=C2SC(=NC2=C1)C1=CC=CC(NS(=O)(=O)C2=CC(F)=CC=C2OC)=C1C	HCC-827	4.42 ± 0.33	NCI-H1975	4.56 ± 0.23
110	16i	COC1=CC=C(F)C=C1S(=O)(=O)NC1=C(C)C(=CC=C1)C1=NC2=CC(=CN=C2S1)C1=CC=C(N=C1)C#N	HCC-827	4.38 ± 0.40	NCI-H1975	4.50 ± 0.24
111	16j	COC1=CC=C(F)C=C1S(=O)(=O)NC1=C(C)C(=CC=C1)C1=NC2=CC(=CN=C2S1)C1=CC=CS1	HCC-827	4.88 ± 0.18	NCI-H1975	4.72 ± 0.20
112	16k	COC1=CC=C(F)C=C1S(=O)(=O)NC1=C(C)C(=CC=C1)C1=NC2=CC(=CN=C2S1)C1=CC=C(C=C1)C(C)=O	HCC-827	6.14 ± 0.36	NCI-H1975	6.30 ± 0.14
113	16l	COC1=CC=C(F)C=C1S(=O)(=O)NC1=C(C)C(=CC=C1)C1=NC2=CC(=CN=C2S1)C1=CN=C(N)N=C1	HCC-827	4.31 ± 0.20	NCI-H1975	4.14 ± 0.33
114	16m	COC1=CC=C(F)C=C1S(=O)(=O)NC1=C(C)C(=CC=C1)C1=NC2=CC(=CN=C2S1)C1=CC=C(N=C1)C(F)(F)F	HCC-827	4.36 ± 0.14	NCI-H1975	4.44 ± 0.30
115	19a	COC1=CC=C(F)C=C1S(=O)(=O)NC1=C(C)C(=CC=C1)C1=NC2=CC(CN3CCN(C)CC3)=CN=C2S1	HCC-827	4.50 ± 0.23	NCI-H1975	4.60 ± 0.18
116	19b	COC1=CC=C(F)C=C1S(=O)(=O)NC1=C(C)C(=CC=C1)C1=NC2=CC(CN3CCOCC3)=CN=C2S1	HCC-827	4.61 ± 0.08	NCI-H1975	4.70 ± 0.22
117	20	COC1=CC=C(F)C=C1S(=O)(=O)NC1=C(C)C(=CC=C1)C1=NC2=CC(=CN=C2S1)C#N	HCC-827	6.11 ± 0.36	NCI-H1975	6.25 ± 0.29
118	4a	COC1=CC(=CC(OC)=C1OC)C1=NC2=CC(N3CCOCC3)=C(C=C2N1)C#CC1=CC=C(Cl)C=C1	SiHa	20.90 ± 1.81	HeLa	3.23 ± 0.44	Design, synthesis, and biological evaluation of novel benzimidazole derivatives as anti-cervical cancer agents through PI3K/Akt/mTOR pathway and tubulin inhibition (https://doi.org/10.1016/j.ejmech.2024.116425) Cell Viability Assay: 48 h incubation, MTT assay
119	4b	COC1=CC(=CC(OC)=C1OC)C1=NC2=CC(N3CCOCC3)=C(C=C2N1)C#CC1=CC=CC=C1Cl	SiHa	7.81 ± 1.04	HeLa	10.43 ± 0.91
120	4c	COC1=CC(=CC(OC)=C1OC)C1=NC2=CC(N3CCOCC3)=C(C=C2N1)C#CC1=CC=CC=C1	SiHa	7.07 ± 0.43	HeLa	8.07 ± 1.45
121	4d	COC1=CC=C(C=C1)C#CC1=C(C=C2N=C(NC2=C1)C1=CC(OC)=C(OC)C(OC)=C1)N1CCOCC1	SiHa	26.84 ± 9.21	HeLa	3.67 ± 0.43
122	4e	COC1=CC(=CC(OC)=C1OC)C1=NC2=CC(N3CCOCC3)=C(C=C2N1)C#CC1=CC=CC=C1F	SiHa	>100	HeLa	8.60 ± 1.36
123	4f	COC1=CC(OC)=C(OC)C=C1C1=NC2=CC(N3CCOCC3)=C(C=C2N1)C#CC1=CC=C(C)C=C1	SiHa	>100	HeLa	16.73 ± 1.17
124	4g	COC1=CC(OC)=C(OC)C=C1C1=NC2=CC(N3CCOCC3)=C(C=C2N1)C#CC1=CC=CC=C1Cl	SiHa	24.38 ± 4.23	HeLa	16.87 ± 0.23
125	4h	COC1=CC(OC)=C(OC)C=C1C1=NC2=CC(N3CCOCC3)=C(C=C2N1)C#CC1=CC=CC=C1	SiHa	25.05 ± 4.72	HeLa	19.26 ± 2.70
126	4i	COC1=CC(OC)=C(OC)C=C1C1=NC2=CC(N3CCOCC3)=C(C=C2N1)C#CC1=CC=C(C=C1)C(F)(F)F	SiHa	>100	HeLa	29.30 ± 6.17
127	4j	COC1=CC(OC)=C(OC)C=C1C1=NC2=CC(N3CCOCC3)=C(C=C2N1)C#CC1=CC=CC=C1F	SiHa	27.19 ± 1.97	HeLa	20.12 ± 0.36
128	4k	COC1=CC(=CC(OC)=C1OC)C1=NC2=CC(N3CCOCC3)=C(\C=C\C(=O)NC(C)(C)C)C=C2N1	SiHa	16.99 ± 1.41	HeLa	4.21 ± 0.75
129	4l	COC1=CC(=CC(OC)=C1OC)C1=NC2=CC(N3CCOCC3)=C(\C=C\C(=O)N(C)C)C=C2N1	SiHa	>100	HeLa	14.50 ± 0.23
130	4m	COC1=CC(=CC(OC)=C1OC)C1=NC2=CC(N3CCN(C)CC3)=C(C=C2N1)C#CC1=CC=C(Cl)C=C1	SiHa	5.49 ± 2.17	HeLa	3.45 ± 0.18
131	4n	COC1=CC(=CC(OC)=C1OC)C1=NC2=CC(N3CCN(C)CC3)=C(C=C2N1)C#CC1=CC=CC=C1Cl	SiHa	1.40 ± 0.32	HeLa	1.73 ± 0.49
132	4o	COC1=CC(=CC(OC)=C1OC)C1=NC2=CC(N3CCN(C)CC3)=C(C=C2N1)C#CC1=CC=CC=C1	SiHa	5.05 ± 0.53	HeLa	4.96 ± 0.20
133	4p	COC1=CC=C(C=C1)C#CC1=C(C=C2N=C(NC2=C1)C1=CC(OC)=C(OC)C(OC)=C1)N1CCN(C)CC1	SiHa	3.13 ± 1.16	HeLa	2.07 ± 0.47
134	4q	COC1=CC(=CC(OC)=C1OC)C1=NC2=CC(N3CCN(C)CC3)=C(C=C2N1)C#CC1=CC=C(C=C1)C(F)(F)F	SiHa	6.54 ± 2.42	HeLa	3.13 ± 0.19
135	4r	COC1=CC(=CC(OC)=C1OC)C1=NC2=CC(N3CCN(C)CC3)=C(C=C2N1)C#CC1=CC=CC=C1F	SiHa	3.38 ± 1.49	HeLa	5.03 ± 0.88
136	4s	COC1=CC(OC)=C(OC)C=C1C1=NC2=CC(N3CCN(C)CC3)=C(C=C2N1)C#CC1=CC=C(Cl)C=C1	SiHa	3.03 ± 0.22	HeLa	1.61 ± 0.20
137	4t	COC1=CC(OC)=C(OC)C=C1C1=NC2=CC(N3CCN(C)CC3)=C(C=C2N1)C#CC1=CC=CC=C1Cl	SiHa	6.07 ± 0.32	HeLa	2.96 ± 0.56
138	4u	COC1=CC(OC)=C(OC)C=C1C1=NC2=CC(N3CCN(C)CC3)=C(C=C2N1)C#CC1=CC=CC=C1	SiHa	6.16 ± 0.29	HeLa	5.25 ± 0.25
139	1a	NC1CCN(C1)C(=O)C1=CC2=C(O)C3=C(C(O)=C2N1)C(=O)C1=C(C=CC=C1)C3=O	A549	7.7 ± 1.1	K-562	0.5 ± 0.1	Naphthoindole-2-carboxamides as a lipophilic chemotype of hetarene-anthraquinones potent against P-gp resistant tumor cells (https://doi.org/10.1016/j.ejmech.2024.117013) Antiproliferative activity assay: 72 h exposure; MTT assay
	1a (isomeric)	N[C@H]1CCN(C1)C(=O)C1=CC2=C(O)C3=C(C(O)=C2N1)C(=O)C1=C(C=CC=C1)C3=O
140	1b	NC1CCN(C1)C(=O)C1=CC2=C(O)C3=C(C(O)=C2C1)C(=O)C1=C(C=CC=C1)C3=O	A549	4.3 ± 0.6	K-562	1.3 ± 0.2
	1b (isomeric)	N[C@@H]1CCN(C1)C(=O)C1=CC2=C(O)C3=C(C(O)=C2C1)C(=O)C1=C(C=CC=C1)C3=O
141	1c	OC1=C2CC(=CC2=C(O)C2=C1C(=O)C1=C(C=CC=C1)C2=O)C(=O)NC1CCNC1	A549	4.3 ± 0.5	K-562	3.5 ± 0.5
	1c (isomeric)	OC1=C2CC(=CC2=C(O)C2=C1C(=O)C1=C(C=CC=C1)C2=O)C(=O)N[C@@H]1CCNC1
142	1d	OC1=C2CC(=CC2=C(O)C2=C1C(=O)C1=C(C=CC=C1)C2=O)C(=O)NC1CCNC1	A549	4.0 ± 0.5	K-562	2.3 ± 0.3
	1d (isomeric)	OC1=C2CC(=CC2=C(O)C2=C1C(=O)C1=C(C=CC=C1)C2=O)C(=O)N[C@H]1CCNC1
143	1e	OC1=C2CC(=CC2=C(O)C2=C1C(=O)C1=C(C=CC=C1)C2=O)C(=O)NC1CCCNC1	A549	4.2 ± 0.5	K-562	1.8 ± 0.3
144	1f	OC1=C2CC(=CC2=C(O)C2=C1C(=O)C1=C(C=CC=C1)C2=O)C(=O)NC1CCNCC1	A549	9.0 ± 1.3	K-562	1.2 ± 0.2
145	1g	NC1CCCN(C1)C(=O)C1=CC2=C(O)C3=C(C(O)=C2C1)C(=O)C1=C(C=CC=C1)C3=O	A549	1.2 ± 0.2	K-562	1.2 ± 0.2
146	1h	OC1=C2CC(=CC2=C(O)C2=C1C(=O)C1=C(C=CC=C1)C2=O)C(=O)N1CCCCC1	A549	4.4 ± 0.6	K-562	1.0 ± 0.2
147	7	COC1=CC2=C(C=C1OC)C(=C1C(=O)OCC1=C2OCC1=CN(N=N1)C1OC(C)C(OC(C)=O)C(OC(C)=O)C1OC(C)=O)C1=CC=C2OCOC2=C1	CFPAC-1	0.097 ± 0.007	PA-TU-8988T	0.163 ± 0.009	Synthesis and anti-tumor activity of nitrogen-containing derivatives of the natural product diphyllin (https://doi.org/10.1016/j.ejmech.2022.114708) Cell Viability Assay: 72 h incubation, sulforhodamine B (SRB) staining
	7 (isomeric)	COC1=CC2=C(C=C1OC)C(=C1C(=O)OCC1=C2OCC1=CN(N=N1)[C@H]1O[C@@H](C)[C@H](OC(C)=O)[C@@H](OC(C)=O)[C@H]1OC(C)=O)C1=CC=C2OCOC2=C1
148	8	COC1=C(OC)C=C2C(=C1)C(OCCCC1=CN(N=N1)C1OC(C)C(OC(C)=O)C(OC(C)=O)C1OC(C)=O)=C1COC(=O)C1=C2C1=CC=C2OCOC2=C1	CFPAC-1	0.007 ± 0.001	PA-TU-8988T	0.024 ± 0.002
	8 (isomeric)	COC1=C(OC)C=C2C(=C1)C(OCCCC1=CN(N=N1)[C@H]1O[C@@H](C)[C@H](OC(C)=O)[C@@H](OC(C)=O)[C@H]1OC(C)=O)=C1COC(=O)C1=C2C1=CC=C2OCOC2=C1
149	9	COC1=C(OC)C=C2C(=C1)C(OCCOCC1=CN(N=N1)C1OC(C)C(OC(C)=O)C(OC(C)=O)C1OC(C)=O)=C1COC(=O)C1=C2C1=CC=C2OCOC2=C1	CFPAC-1	0.050 ± 0.009	PA-TU-8988T	0.766 ± 0.056
	9 (isomeric)	COC1=C(OC)C=C2C(=C1)C(OCCOCC1=CN(N=N1)[C@H]1O[C@@H](C)[C@H](OC(C)=O)[C@@H](OC(C)=O)[C@H]1OC(C)=O)=C1COC(=O)C1=C2C1=CC=C2OCOC2=C1
150	14	COC1=C(C=C2C(C(NC(OC(C)(C)C)=O)=C3COC(C3=C2C4=CC=C5OCOC5=C4)=O)=C1)OC	CFPAC-1	0.037 ± 0.002	PA-TU-8988T	0.088 ± 0.006
151	15	COC1=C(OC)C=C2C(=C1)C(N)=C1COC(=O)C1=C2C1=CC=C2OCOC2=C1	CFPAC-1	0.003 ± 0.002	PA-TU-8988T	0.037 ± 0.002

## Sheet: Unseen_cmpnds_pred_results
					PaccMann			Precily			DeepCDR			DrugCell
SMILES	Cell Line	COSMIC ID	IC50	IC50_mean	IC50	In 3 Sigma?	Factor difference (for EVAPA)	IC50	In 3 Sigma?	Factor difference (for EVAPA)	IC50	In 3 Sigma?	Factor difference (for EVAPA)	IC50	In 3 Sigma?	Factor difference (for EVAPA)
ClC1=CC(NC(CC2=CC=C(S(CC)(=O)=O)C=C2)=O)=CC(Cl)=C1C3=C(OC(F)(F)F)C=CC=C3	22RV1	924100	13.32 ± 1.06	13.32	7.61768	FALSE	0.571898	0.617457	FALSE	0.0463556	6.34696	FALSE	0.476499	10.2369	FALSE	0.768537
C=CC(NC1=C(C2=CC=C(NC(CC3=CC=C(S(CC)(=O)=O)C=C3)=O)C=C2C)C=CC=C1)=O	22RV1		2.25 ± 0.10	2.25	1.85942	FALSE	0.826409	1.84865	FALSE	0.821622	4.72527	FALSE	2.10012	7.47377	FALSE	3.32168
C=CC(NC1=C(C2=CC=C(NC(CC3=CC=C(S(CC)(=O)=O)C=C3)=O)C=C2C(F)(F)F)C=CC=C1)=O	22RV1		2.56 ± 0.32	2.56	7.88713	FALSE	3.08091	1.42112	FALSE	0.555127	6.04004	FALSE	2.35939	6.09214	FALSE	2.37974
C=CC(NC1=C(C2=CC=C(NC(CC3=CC=C(S(CC)(=O)=O)C=C3)=O)C=C2F)C=CC=C1)=O	22RV1		1.44 ± 0.14	1.44	5.5599	FALSE	3.86104	1.62727	TRUE	1.13005	4.7304	FALSE	3.285	5.93579	FALSE	4.12208
C=CC(NC1=C(C2=CC=C(NC(CC3=CC=C(S(CC)(=O)=O)C=C3)=O)C=C2Cl)C=CC=C1)=O	22RV1		0.77 ± 0.07	0.77	5.37933	FALSE	6.98614	1.70574	FALSE	2.21524	5.40026	FALSE	7.01332	4.4531	FALSE	5.78324
C=CC(NC1=C(C2=C(Cl)C=C(NC(CC3=CC=C(S(CC)(=O)=O)C=C3)=O)C=C2Cl)C=CC=C1)=O	22RV1		0.92 ± 0.20	0.92	8.22002	FALSE	8.9348	1.29999	TRUE	1.41303	6.41142	FALSE	6.96893	4.86079	FALSE	5.28346
O=C(NCCCCC1=CC=CS1)C2=CC(N3C(C4=CC=C(OC)C=C4)=NC(CC)=N3)=CC=C2	MKN45	925340	0.76 ± 0.11	0.76	5.97332	FALSE	7.85963	1.50133	FALSE	1.97544	3.3829	FALSE	4.45118	10.6867	FALSE	14.0614
O=C(NCCCCN1C=CC=N1)C2=CC(N3C(C4=CC=C(OC)C=C4)=NC(CC)=N3)=CC=C2	MKN45		0.54 ± 0.02	0.54	4.70938	FALSE	8.72107	1.65899	FALSE	3.07221	3.05668	FALSE	5.66051	4.39822	FALSE	8.14485
O=C(NCCCCN1N=CC=N1)C2=CC(N3C(C4=CC=C(OC)C=C4)=NC(CC)=N3)=CC=C2	MKN45		0.14 ± 0.03	0.14	3.59506	FALSE	25.679	1.68512	FALSE	12.0366	4.02971	FALSE	28.7837	5.35162	FALSE	38.2259
O=C(NCCCCN1N=CN=N1)C2=CC(N3C(C4=CC=C(OC)C=C4)=NC(CC)=N3)=CC=C2	MKN45		2.86 ± 0.21	2.86	1.66033	FALSE	0.580535	1.34991	FALSE	0.471998	4.21687	FALSE	1.47443	4.43	TRUE	1.54895
O=C(NCCCCN1C=C(F)C=N1)C2=CC(N3C(C4=CC=C(OC)C=C4)=NC(CC)=N3)=CC=C2	MKN45		5.91 ± 0.57	5.91	3.34897	FALSE	0.566662	1.65041	FALSE	0.279257	3.22189	FALSE	0.545159	6.86063	FALSE	1.16085
O=C(NCCCCN1N=C(Br)C=N1)C2=CC(N3C(C4=CC=C(OC)C=C4)=NC(CC)=N3)=CC=C2	MKN45		0.26 ± 0.21	0.26	2.33152	FALSE	8.96738	1.80864	FALSE	6.95632	3.68126	FALSE	14.1587	5.36127	TRUE	20.6203
O=C(NCCCCCN1N=CC=N1)C2=CC(N3C(C4=CC=C(OC)C=C4)=NC(CC)=N3)=CC=C2	MKN45		6.61 ± 0.80	6.61	4.1256	FALSE	0.624145	1.64687	FALSE	0.249149	3.71113	FALSE	0.561442	4.93326	FALSE	0.746333
O=C(NCCCCN1N=CC=N1)C2=CC(N3C(C4=CC(OC)=CC=C4)=NC(CC)=N3)=CC=C2	MKN45		9.14 ± 0.83	9.14	3.42033	FALSE	0.374216	1.21899	FALSE	0.133369	3.94919	FALSE	0.432077	6.13003	FALSE	0.670682
O=C(NCCCCN1N=CC=N1)C2=CC(N3C(C4=NC=C(OC)C=C4)=NC(CC)=N3)=CC=C2	MKN45		0.25 ± 0.04	0.25	2.82508	FALSE	11.3003	1.46811	FALSE	5.87244	3.93807	FALSE	15.7523	7.44394	FALSE	29.7758
O=C(NCCCCN1N=CC=N1)C2=CC(N3C(C4=NC=C(OC)C=N4)=NC(CC)=N3)=CC=C2	MKN45		0.50 ± 0.02	0.5	1.70843	FALSE	3.41685	1.52746	FALSE	3.05491	3.75838	FALSE	7.51675	5.61926	TRUE	11.2385
O=C(NCCCCN1N=CC=N1)C2=CC(N3C(C4=CC=CC=C4)=NC(CC)=N3)=CC=C2	MKN45		3.12 ± 0.27	3.12	2.20075	FALSE	0.70537	1.66678	FALSE	0.534224	3.69847	TRUE	1.18541	3.68253	FALSE	1.1803
O=C(NCCCCN1N=CC=N1)C2=CC(N3C(C4=CC=C(O)C=C4)=NC(CC)=N3)=CC=C2	MKN45		0.49 ± 0.01	0.49	3.91663	FALSE	7.99312	1.11612	FALSE	2.2778	3.93443	FALSE	8.02944	2.88579	FALSE	5.88938
O=C(NCCCCN1N=CC=N1)C2=CC(N3C(C4=CC=C(C)C=C4)=NC(CC)=N3)=CC=C2	MKN45		0.30 ± 0.04	0.3	4.22298	FALSE	14.0766	1.71197	FALSE	5.70656	4.17947	FALSE	13.9316	4.88417	FALSE	16.2806
O=C(NCCCCN1N=CC=N1)C2=CC(N3C(C4=CC=C(CCC)C=C4)=NC(CC)=N3)=CC=C2	MKN45		1.97 ± 0.21	1.97	4.52391	FALSE	2.2964	1.62497	TRUE	0.82486	4.52433	FALSE	2.29662	5.40541	FALSE	2.74386
O=C(NCCCCN1N=CC=N1)C2=CC(N3C(C4=CC=C(F)C=C4)=NC(CC)=N3)=CC=C2	MKN45		0.30 ± 0.01	0.3	2.63983	FALSE	8.79943	1.65919	FALSE	5.53063	3.66442	FALSE	12.2147	4.38066	TRUE	14.6022
O=C(NCCCCN1N=CC=N1)C2=CC(N3C(C4=CC=C(OC(F)(F)F)C=C4)=NC(CC)=N3)=CC=C2	MKN45		5.14 ± 0.44	5.14	3.53025	FALSE	0.686819	1.23673	FALSE	0.240609	2.09423	FALSE	0.407438	5.88378	FALSE	1.1447
O=C(NCCCCN1N=CC=N1)C2=CC(N3C(C4=CC=C([N+]([O-])=O)C=C4)=NC(CC)=N3)=CC=C2	MKN45		0.88 ± 0.23	0.88	0.748862	TRUE	0.85098	1.07278	TRUE	1.21906	3.90126	FALSE	4.43325	3.71954	FALSE	4.22675
O=S(C1=CC=C(CN(C2=CC=CC=C2)C)C=C1)(N(C#C)C)=O	AsPC-1	910702	0.172 ± 0.006	0.172	8.36493	FALSE	48.6333	2.19893	FALSE	12.7845	5.86785	FALSE	34.1154	8.58486	FALSE	49.912
O=S(C1=CC=C(CN(C2=CC=C(F)C=C2)C)C=C1)(N(C#C)C)=O	AsPC-1		0.188 ± 0.007	0.188	4.68985	FALSE	24.946	1.86068	FALSE	9.89726	7.524	FALSE	40.0213	8.42834	FALSE	44.8316
O=S(C1=CC=C(CN(C2=CC=C(C(F)(F)F)C=C2)C)C=C1)(N(C#C)C)=O	AsPC-1		0.085 ± 0.009	0.085	14.4129	FALSE	169.564	1.39507	FALSE	16.4126	5.72371	FALSE	67.3378	17.9358	FALSE	211.01
O=S(C1=CC=C(CN(C2=CC=C(C3=NC(C=CC=C4)=C4S3)C=C2)C)C=C1)(N(C#C)C)=O	AsPC-1		0.028 ± 0.004	0.028	3.37132	FALSE	120.404	1.49825	FALSE	53.509	3.14478	FALSE	112.314	4.83364	FALSE	172.63
O=S(C1=CC=C(CN(C2=CC=C(OC)C=C2)C)C=C1)(N(C#C)C)=O	AsPC-1		0.578 ± 0.680	0.578	6.12643	FALSE	10.5994	2.14802	TRUE	3.7163	8.05038	FALSE	13.928	10.4333	FALSE	18.0506
O=S(C1=CC=C(CN(C2=CC=C(OCC)C=C2)C)C=C1)(N(C#C)C)=O	AsPC-1		0.140 ± 0.096	0.14	5.95378	FALSE	42.527	2.37303	FALSE	16.9502	6.65908	FALSE	47.5649	9.14493	FALSE	65.321
O=S(C1=CC=C(CN(C2=CC=C(C3=NC4=C(C=CC=C4)N3C)C=C2)C)C=C1)(N(C#C)C)=O	AsPC-1		0.273 ± 0.007	0.273	2.46778	FALSE	9.03949	1.20425	FALSE	4.41117	2.32148	FALSE	8.50358	2.87025	FALSE	10.5137
O=S(C1=CC=C(CN(C2=CC=C(C#C)C=C2)C)C=C1)(N(C#C)C)=O	AsPC-1		0.121 ± 0.005	0.121	8.63459	FALSE	71.3602	2.20027	FALSE	18.184	7.57324	FALSE	62.5887	9.92841	FALSE	82.0529
O=S(C1=CC=C(CN(C2=CC=C(C#C)C=C2)CC)C=C1)(N(C#C)C)=O	AsPC-1		0.098 ± 0.010	0.098	6.36812	FALSE	64.9808	2.04755	FALSE	20.8934	8.29894	FALSE	84.6831	12.374	FALSE	126.266
O=S(C1=CC=C(CN(C2=CC=C(C#C)C=C2)CC#C)C=C1)(N(C#C)C)=O	AsPC-1		0.266 ± 0.036	0.266	9.07973	FALSE	34.1343	2.10192	FALSE	7.90196	9.27101	FALSE	34.8534	10.515	FALSE	39.53
O=S(C1=CC=C(CN(C2=CC=C(C3=NC(C=CC=C4)=C4S3)C=C2)CC#C)C=C1)(N(C#C)C)=O	AsPC-1		0.022 ± 0.001	0.022	1.13214	FALSE	51.4608	1.47034	FALSE	66.8335	5.1878	FALSE	235.809	5.25405	FALSE	238.821
O=S(C1=CC(CN(C)C2=CC=C(C(F)(F)F)C=C2)=CC=C1)(N(C#C)C)=O	AsPC-1		0.250 ± 0.043	0.25	14.4736	FALSE	57.8942	1.30334	FALSE	5.21335	5.35941	FALSE	21.4376	16.6066	TRUE	66.4264
ClC1=CC2=C(C=C1)SC3=CC=CC=C3N2CCCN4CCN(CCOC(CCC(N(CCS(C)(=O)=O)CC5=CC=C(C6=CC(C(NC7=CC(Cl)=C(OCC8=CC(F)=CC=C8)C=C7)=NC=N9)=C9C=C6)O5)=O)=O)CC4	MDA-MB-231	905960	1.54 ± 0.41	1.54	27.994	FALSE	18.1779	0.850929	TRUE	0.552551	4.85111	FALSE	3.15007	0.853679	FALSE	0.554337
ClC1=CC2=C(C=C1)SC3=CC=CC=C3N2CCCN4CCN(CCOC(CCCC(N(CCS(C)(=O)=O)CC5=CC=C(C6=CC(C(NC7=CC(Cl)=C(OCC8=CC(F)=CC=C8)C=C7)=NC=N9)=C9C=C6)O5)=O)=O)CC4	MDA-MB-231		4.51 ± 0.38	4.51	33.6129	FALSE	7.45297	0.956655	FALSE	0.212119	4.88965	TRUE	1.08418	1.07487	TRUE	0.23833
O=C(CCC(N(CCS(C)(=O)=O)CC1=CC=C(C2=CC(C(NC3=CC(Cl)=C(OCC4=CC(F)=CC=C4)C=C3)=NC=N5)=C5C=C2)O1)=O)OCCN(CC6)CCN6CCCN7C8=C(C=CC(C(F)(F)F)=C8)SC9=CC=CC=C97	MDA-MB-231		2.98 ± 0.87	2.98	25.2491	FALSE	8.47285	0.951853	TRUE	0.319414	7.26969	FALSE	2.43949	3.77651	TRUE	1.26728
O=C(CCCC(N(CCS(C)(=O)=O)CC1=CC=C(C2=CC(C(NC3=CC(Cl)=C(OCC4=CC(F)=CC=C4)C=C3)=NC=N5)=C5C=C2)O1)=O)OCCN(CC6)CCN6CCCN7C8=C(C=CC(C(F)(F)F)=C8)SC9=CC=CC=C97	MDA-MB-231		6.58 ± 1.01	6.58	28.3877	FALSE	4.31425	0.934629	FALSE	0.142041	7.49778	TRUE	1.13948	4.4185	TRUE	0.671504
O=C(CCC(N(CCS(C)(=O)=O)CC1=CC=C(C2=CC(C(NC3=CC(Cl)=C(OCC4=CC(F)=CC=C4)C=C3)=NC=N5)=C5C=C2)O1)=O)OC(C)C6=CC7=C(C(C(C=CC=C8)=C8C7=O)=O)O6	MDA-MB-231		3.61 ± 0.38	3.61	13.5097	FALSE	3.74229	1.25494	FALSE	0.34763	7.21711	FALSE	1.9992	3.13805	TRUE	0.869265
O=C(CCCC(N(CCS(C)(=O)=O)CC1=CC=C(C2=CC(C(NC3=CC(Cl)=C(OCC4=CC(F)=CC=C4)C=C3)=NC=N5)=C5C=C2)O1)=O)OC(C)C6=CC7=C(C(C(C=CC=C8)=C8C7=O)=O)O6	MDA-MB-231		2.04 ± 1.76	2.04	15.3211	FALSE	7.51035	1.24043	TRUE	0.608054	7.71674	FALSE	3.78272	3.3811	TRUE	1.6574
NC1=NC(N(C=C1)[C@H]2C(F)(F)[C@H](O)[C@@H](COP(OC3=CC=CC=C3)(N[C@@H](C)C(OC(C)C)=O)=O)O2)=O	MM1S	1659818	0.500 ± 0.035	0.5	0.273073	FALSE	0.546147	0.373131	FALSE	0.746262	0.122749	FALSE	0.245498	0.404461	FALSE	0.808922
NC1=NC(N(C=C1)C2C(F)(F)C(O)C(COP(OC3=CC=CC=C3)(NC(C)C(OC(C)C)=O)=O)O2)=O				0.5	0.101361	FALSE	0.202721	0.854958	FALSE	1.70992	0.149097	FALSE	0.298195	0.134096	FALSE	0.268192
NC1=NC(N(C=C1)[C@H]2C(F)(F)[C@H](O)[C@@H](COP(OC3=CC=CC=C3)(N[C@@H](C)C(OC)=O)=O)O2)=O	MM1S		0.111 ± 0.033	0.111	0.189387	TRUE	1.70619	0.337122	FALSE	3.03713	0.187834	TRUE	1.6922	0.276872	TRUE	2.49434
NC1=NC(N(C=C1)C2C(F)(F)C(O)C(COP(OC3=CC=CC=C3)(NC(C)C(OC)=O)=O)O2)=O				0.111	0.0897659	TRUE	0.808702	0.714366	FALSE	6.43573	0.265592	FALSE	2.39272	0.0729049	FALSE	0.656801
NC1=NC(N(C=C1)[C@H]2C(F)(F)[C@H](O)[C@@H](COP(OC3=CC=CC=C3)(N[C@@H](C)C(OC4CCCCC4)=O)=O)O2)=O	MM1S		0.130 ± 0.015	0.13	1.69541	FALSE	13.0416	0.629962	FALSE	4.84586	0.601253	FALSE	4.62502	0.56417	TRUE	4.33977
NC1=NC(N(C=C1)C2C(F)(F)C(O)C(COP(OC3=CC=CC=C3)(NC(C)C(OC4CCCCC4)=O)=O)O2)=O				0.13	0.357306	FALSE	2.74851	1.40094	FALSE	10.7764	0.631499	FALSE	4.85768	0.137271	FALSE	1.05593
NC1=NC(N(C=C1)[C@H]2C(F)(F)[C@H](O)[C@@H](COP(OCC(OC)=O)(N[C@@H](C)C(OC3=CC=CC=C3)=O)=O)O2)=O	MM1S		0.0041 ± 0.0003	0.0041	0.810815	FALSE	197.76	0.420846	FALSE	102.645	0.336546	FALSE	82.0845	0.178708	FALSE	43.5874
NC1=NC(N(C=C1)C2C(F)(F)C(O)C(COP(OCC(OC)=O)(NC(C)C(OC3=CC=CC=C3)=O)=O)O2)=O				0.0041	0.212513	FALSE	51.8324	0.845445	FALSE	206.206	0.364616	FALSE	88.9308	0.0426896	FALSE	10.4121
NC1=NC(N(C=C1)[C@H]2C(F)(F)[C@H](O)[C@@H](COP(OCC(OC)=O)(N[C@@H](C)C(OC(C)C)=O)=O)O2)=O	MM1S		0.0047 ± 0.0003	0.0047	0.701273	FALSE	149.207	0.350493	FALSE	74.5729	0.0954385	FALSE	20.3061	0.155393	FALSE	33.0623
NC1=NC(N(C=C1)C2C(F)(F)C(O)C(COP(OCC(OC)=O)(NC(C)C(OC(C)C)=O)=O)O2)=O				0.0047	0.349603	FALSE	74.3837	0.663528	FALSE	141.176	0.114045	FALSE	24.2648	0.048364	FALSE	10.2902
O=C1N=C(N)C=CN1[C@H]2C(F)(F)[C@H](OP3(OCC(OC)=O)=O)[C@@H](CO3)O2	MM1S		0.0027 ± 0.0001	0.0027	0.419576	FALSE	155.398	0.312812	FALSE	115.856	0.0948371	FALSE	35.1249	0.0568124	FALSE	21.0416
O=C1N=C(N)C=CN1C2C(F)(F)C(OP3(OCC(OC)=O)=O)C(CO3)O2				0.0027	0.129938	FALSE	48.1254	0.312812	FALSE	115.856	0.132381	FALSE	49.0301	0.0212968	FALSE	7.88769
O=C1N=C(N)C=CN1[C@H]2C(F)(F)[C@H](OP3(OCC(OCC)=O)=O)[C@@H](CO3)O2	MM1S		0.0039 ± 0.0002	0.0039	1.32418	FALSE	339.532	0.312812	FALSE	80.2082	0.0478723	FALSE	12.2749	0.0770578	FALSE	19.7584
O=C1N=C(N)C=CN1C2C(F)(F)C(OP3(OCC(OCC)=O)=O)C(CO3)O2				0.0039	0.497301	FALSE	127.513	0.312812	FALSE	80.2082	0.0519331	FALSE	13.3162	0.0292873	FALSE	7.50957
O=C1N=C(N)C=CN1[C@H]2C(F)(F)[C@H](OP3(OCC(OCC4=CC=CC=C4)=O)=O)[C@@H](CO3)O2	MM1S		0.0036 ± 0.0003	0.0036	0.754328	FALSE	209.535	0.312812	FALSE	86.8922	0.223145	FALSE	61.9846	0.038304	FALSE	10.64
O=C1N=C(N)C=CN1C2C(F)(F)C(OP3(OCC(OCC4=CC=CC=C4)=O)=O)C(CO3)O2				0.0036	0.233904	FALSE	64.9734	0.357206	FALSE	99.224	0.282288	FALSE	78.4133	0.0144422	FALSE	4.01173
O=C1N=C(N)C=CN1[C@H]2C(F)(F)[C@H](OP3(OCC(OC(C)C)=O)=O)[C@@H](CO3)O2	MM1S		0.0054 ± 0.0004	0.0054	0.39248	FALSE	72.6816	0.312812	FALSE	57.9281	0.0685903	FALSE	12.7019	0.061176	FALSE	11.3289
O=C1N=C(N)C=CN1C2C(F)(F)C(OP3(OCC(OC(C)C)=O)=O)C(CO3)O2				0.0054	0.199641	FALSE	36.9705	0.312812	FALSE	57.9281	0.0908976	FALSE	16.8329	0.0229004	FALSE	4.24082
NC1=NC(N(C=C1)[C@H]2C(F)(F)[C@H](O)[C@@H](COP(OC3=CC=CC=C3)(N[C@@H](C)C(OCC4=CC=CC=C4)=O)=O)O2)=O	MM1S		0.031 ± 0.002	0.031	2.83023	FALSE	91.2976	0.448773	FALSE	14.4765	0.589284	FALSE	19.0092	0.285247	FALSE	9.20151
NC1=NC(N(C=C1)C2C(F)(F)C(O)C(COP(OC3=CC=CC=C3)(NC(C)C(OCC4=CC=CC=C4)=O)=O)O2)=O				0.031	1.24967	FALSE	40.3121	1.02165	FALSE	32.9566	0.698365	FALSE	22.5279	0.0634692	FALSE	2.04739
NC1=NC(N(C=C1)[C@H]2C(F)(F)[C@H](O)[C@@H](COP(OCC(OC)=O)(N[C@@H](C)C(OC3=CC=CC=C3)=O)=O)O2)=O	BxPC-3	906693	0.035 ± 0.007	0.035	1.96321	FALSE	56.0917	1.06366	FALSE	30.3902	0.681888	FALSE	19.4825	1.54837	FALSE	44.239
NC1=NC(N(C=C1)C2C(F)(F)C(O)C(COP(OCC(OC)=O)(NC(C)C(OC3=CC=CC=C3)=O)=O)O2)=O				0.035	0.875708	FALSE	25.0202	1.55114	FALSE	44.3184	0.606087	FALSE	17.3168	0.521211	FALSE	14.8917
NC1=NC(N(C=C1)[C@H]2C(F)(F)[C@H](O)[C@@H](COP(OCC(OC)=O)(N[C@@H](C)C(OC(C)C)=O)=O)O2)=O	BxPC-3		0.040 ± 0.007	0.04	1.87899	FALSE	46.9747	0.845776	FALSE	21.1444	0.318541	FALSE	7.96352	1.40018	FALSE	35.0045
NC1=NC(N(C=C1)C2C(F)(F)C(O)C(COP(OCC(OC)=O)(NC(C)C(OC(C)C)=O)=O)O2)=O				0.04	1.14996	FALSE	28.7491	1.42987	FALSE	35.7468	0.242584	FALSE	6.06459	0.576143	FALSE	14.4036
O=C1N=C(N)C=CN1[C@H]2C(F)(F)[C@H](OP3(OCC(OC)=O)=O)[C@@H](CO3)O2	BxPC-3		0.031 ± 0.003	0.031	1.0073	FALSE	32.4935	0.334031	FALSE	10.7752	0.865156	FALSE	27.9082	0.654817	FALSE	21.1231
O=C1N=C(N)C=CN1C2C(F)(F)C(OP3(OCC(OC)=O)=O)C(CO3)O2				0.031	0.554815	FALSE	17.8972	0.430961	FALSE	13.902	1.03299	FALSE	33.3221	0.292	FALSE	9.41937
O=C1N=C(N)C=CN1[C@H]2C(F)(F)[C@H](OP3(OCC(OCC)=O)=O)[C@@H](CO3)O2	BxPC-3		0.023 ± 0.009	0.023	1.54013	FALSE	66.9622	0.333294	FALSE	14.491	0.339674	FALSE	14.7684	0.829942	FALSE	36.0844
O=C1N=C(N)C=CN1C2C(F)(F)C(OP3(OCC(OCC)=O)=O)C(CO3)O2				0.023	0.711269	FALSE	30.9247	0.425171	FALSE	18.4857	0.481925	FALSE	20.9532	0.38251	FALSE	16.6309
O=C1N=C(N)C=CN1[C@H]2C(F)(F)[C@H](OP3(OCC(OCC4=CC=CC=C4)=O)=O)[C@@H](CO3)O2	BxPC-3		0.017 ± 0.003	0.017	2.01303	FALSE	118.413	0.56531	FALSE	33.2535	0.819292	FALSE	48.1936	0.477305	FALSE	28.0768
O=C1N=C(N)C=CN1C2C(F)(F)C(OP3(OCC(OCC4=CC=CC=C4)=O)=O)C(CO3)O2				0.017	0.808569	FALSE	47.5629	0.888045	FALSE	52.238	0.875215	FALSE	51.4832	0.20792	FALSE	12.2306
O=C1N=C(N)C=CN1[C@H]2C(F)(F)[C@H](OP3(OCC(OC(C)C)=O)=O)[C@@H](CO3)O2	BxPC-3		0.047 ± 0.009	0.047	0.962335	FALSE	20.4752	0.407658	FALSE	8.67358	0.531634	FALSE	11.3114	0.694058	FALSE	14.7672
O=C1N=C(N)C=CN1C2C(F)(F)C(OP3(OCC(OC(C)C)=O)=O)C(CO3)O2				0.047	0.517018	FALSE	11.0004	0.621414	FALSE	13.2216	0.803812	FALSE	17.1024	0.31074	FALSE	6.61148
O=C1N=C(NC(CC)=O)C=CN1[C@H]2C(F)(F)[C@H](OP3(OCC(OCC4=CC=CC=C4)=O)=O)[C@@H](CO3)O2	BxPC-3		0.908 ± 0.097	0.908	2.0373	FALSE	2.24372	0.632245	TRUE	0.696305	0.494305	FALSE	0.544389	2.43659	FALSE	2.68347
O=C1N=C(NC(CC)=O)C=CN1C2C(F)(F)C(OP3(OCC(OCC4=CC=CC=C4)=O)=O)C(CO3)O2				0.908	0.916873	TRUE	1.00977	1.12075	TRUE	1.23431	0.713794	TRUE	0.786117	1.2644	FALSE	1.39251
O=C1N=C(N)C=CN1[C@H]2C(F)(F)[C@H](OP3(OCCC(OCC4=CC=CC=C4)=O)=O)[C@@H](CO3)O2	BxPC-3		0.068 ± 0.007	0.068	2.94978	FALSE	43.3791	0.612246	FALSE	9.00362	1.11805	FALSE	16.4419	0.463847	FALSE	6.82128
O=C1N=C(N)C=CN1C2C(F)(F)C(OP3(OCCC(OCC4=CC=CC=C4)=O)=O)C(CO3)O2				0.068	1.0041	FALSE	14.7662	0.967333	FALSE	14.2255	1.12551	FALSE	16.5517	0.203274	TRUE	2.98932
O=C1N=C(N)C=CN1[C@H]2C(F)(F)[C@H](OP3(OCCCCC(OCC4=CC=CC=C4)=O)=O)[C@@H](CO3)O2	BxPC-3		0.213 ± 0.033	0.213	3.24164	FALSE	15.219	0.65459	FALSE	3.07319	1.93718	FALSE	9.09475	0.291767	TRUE	1.3698
O=C1N=C(N)C=CN1C2C(F)(F)C(OP3(OCCCCC(OCC4=CC=CC=C4)=O)=O)C(CO3)O2				0.213	1.58221	FALSE	7.42823	1.02557	FALSE	4.81489	1.98652	FALSE	9.32638	0.125682	FALSE	0.590057
NC1=NC(N(C=C1)[C@H]2C(F)(F)[C@H](O)[C@@H](COP(OC3=CC=CC=C3)(N[C@@H](C)C(OCC4=CC=CC=C4)=O)=O)O2)=O	BxPC-3		0.230 ± 0.090	0.23	2.6029	FALSE	11.3169	1.13486	FALSE	4.93418	0.986236	FALSE	4.28798	2.15071	FALSE	9.35093
NC1=NC(N(C=C1)C2C(F)(F)C(O)C(COP(OC3=CC=CC=C3)(NC(C)C(OCC4=CC=CC=C4)=O)=O)O2)=O				0.23	1.72546	FALSE	7.502	1.64128	FALSE	7.136	0.774172	FALSE	3.36596	0.714194	FALSE	3.10519
CC1=C(N)C=CC=C1C2=NC3=CC=CN=C3S2	HCC-827	1240146	10.06 ± 0.11	10.06	6.79114	FALSE	0.675064	2.19923	FALSE	0.218612	0.697526	FALSE	0.0693365	5.76382	FALSE	0.572944
CC1=C(NS(=O)(C2=CN=CC=C2)=O)C=CC=C1C3=NC4=CC=CN=C4S3	HCC-827		2.10 ± 0.10	2.1	4.13766	FALSE	1.97031	0.595779	FALSE	0.283704	1.72187	FALSE	0.81994	4.01485	FALSE	1.91183
CC1=C(NS(=O)(C2CCOCC2)=O)C=CC=C1C3=NC4=CC=CN=C4S3	HCC-827		2.11 ± 0.14	2.11	2.64955	FALSE	1.25571	1.34136	FALSE	0.635714	2.20374	TRUE	1.04443	2.97904	TRUE	1.41187
CC1=C(NS(=O)(C2=CN(C)N=C2)=O)C=CC=C1C3=NC4=CC=CN=C4S3	HCC-827		2.18 ± 0.19	2.18	4.28072	FALSE	1.96363	1.35759	FALSE	0.622745	0.97815	FALSE	0.448693	2.33124	FALSE	1.06938
CC1=C(NS(=O)(C2=CC(F)=CC=C2F)=O)C=CC=C1C3=NC4=CC=CN=C4S3	HCC-827		1.16 ± 0.02	1.16	2.1333	FALSE	1.83905	0.682484	FALSE	0.588348	1.87066	FALSE	1.61264	2.08465	FALSE	1.79711
CC1=C(NS(=O)(C2=CC=CC=C2)=O)C=CC=C1C3=NC4=CC=CN=C4S3	HCC-827		2.20 ± 0.23	2.2	4.18251	FALSE	1.90114	1.74628	TRUE	0.793766	1.90825	TRUE	0.867388	4.33361	FALSE	1.96982
CC1=C(NS(=O)(CC2=CC=CC=C2)=O)C=CC=C1C3=NC4=CC=CN=C4S3	HCC-827		2.24 ± 0.16	2.24	4.86216	FALSE	2.17061	1.67285	FALSE	0.74681	2.55172	TRUE	1.13916	2.97963	FALSE	1.33019
CC1=C(NS(=O)(C2=CC=C(F)C=C2F)=O)C=CC=C1C3=NC4=CC=CN=C4S3	HCC-827		1.40 ± 0.20	1.4	3.7345	FALSE	2.6675	1.5962	TRUE	1.14014	1.88815	TRUE	1.34868	2.99936	FALSE	2.1424
CC1=C(NS(=O)(C2=C(OC(F)(F)F)C=CC=C2)=O)C=CC=C1C3=NC4=CC=CN=C4S3	HCC-827		1.52 ± 0.19	1.52	4.72493	FALSE	3.10851	0.64605	FALSE	0.425033	4.59914	FALSE	3.02575	3.10496	FALSE	2.04274
CC1=C(NS(=O)(C2=CC(Cl)=CC=C2)=O)C=CC=C1C3=NC4=CC=CN=C4S3	HCC-827		1.59 ± 0.36	1.59	4.47565	FALSE	2.81487	0.701381	TRUE	0.44112	2.20091	TRUE	1.38422	3.28445	FALSE	2.06569
CC1=C(NS(=O)(C2=CC(C#N)=C(F)C=C2)=O)C=CC=C1C3=NC4=CC=CN=C4S3	HCC-827		1.46 ± 0.04	1.46	1.08531	FALSE	0.743366	0.781643	FALSE	0.535372	2.09284	FALSE	1.43345	4.41232	FALSE	3.02214
CC1=C(NS(=O)(=O)C2=CC(F)=CC=C2F)C=CC=C1C1=NC2=CC(=CN=C2S1)C1=CC(=CC=C1)C(F)(F)F	HCC-827		0.092 ± 0.15	0.092	3.37744	FALSE	36.7113	3.41172	FALSE	37.0839	4.12254	FALSE	44.8102	5.44665	FALSE	59.2027
COC1=C(C2=CC3=C(SC(C4=C(C)C(NS(=O)(C5=C(F)C=CC(F)=C5)=O)=CC=C4)=N3)N=C2)C=CC=N1	HCC-827		0.040 ± 0.37	0.04	3.19985	FALSE	79.9963	1.56029	FALSE	39.0071	3.2808	FALSE	82.0201	4.27592	FALSE	106.898
CSC1=NC=C(C=N1)C1=CN=C2SC(=NC2=C1)C1=CC=CC(NS(=O)(=O)C2=CC(F)=CC=C2F)=C1C	HCC-827		0.010 ± 0.33	0.01	1.2762	FALSE	127.62	2.45178	FALSE	245.178	3.23561	FALSE	323.561	1.33723	FALSE	133.723
COC1=CC=CC(=C1)C1=CN=C2SC(=NC2=C1)C1=CC=CC(NS(=O)(=O)C2=CC(F)=CC=C2F)=C1C	HCC-827		0.72 ± 0.35	0.72	1.23527	TRUE	1.71566	2.81849	FALSE	3.91458	2.55248	FALSE	3.54511	3.60817	FALSE	5.01134
CC1=C(NS(=O)(=O)C2=CC(F)=CC=C2F)C=CC=C1C1=NC2=CC(=CN=C2S1)C1=CC=C(N=C1)C(F)(F)F	HCC-827		0.044 ± 0.32	0.044	3.415	FALSE	77.6137	2.52086	FALSE	57.2922	4.01266	FALSE	91.1968	5.21532	FALSE	118.53
CC1=C(NS(=O)(=O)C2=CC(F)=CC=C2F)C=CC=C1C1=NC2=CC(=CN=C2S1)C1=NNC=C1	HCC-827		0.14 ± 0.15	0.14	1.98776	FALSE	14.1983	2.73902	FALSE	19.5644	3.39063	FALSE	24.2188	1.58091	FALSE	11.2922
CC1=C(NS(=O)(=O)C2=CC(F)=CC=C2F)C=CC=C1C1=NC2=CC(=CN=C2S1)C1=CC=CC=C1	HCC-827		0.089 ± 0.02	0.089	2.72663	FALSE	30.6363	3.21613	FALSE	36.1363	4.08203	FALSE	45.8655	2.27368	FALSE	25.547
CC1=C(NS(=O)(=O)C2=CC(F)=CC=C2F)C=CC=C1C1=NC2=CC(=CN=C2S1)C1=CN=CN=C1	HCC-827		0.021 ± 0.37	0.021	2.40534	FALSE	114.54	2.59056	FALSE	123.36	2.58601	FALSE	123.143	1.53419	FALSE	73.0565
CC1=C(NS(=O)(=O)C2=CC(F)=CC=C2F)C=CC=C1C1=NC2=CC(=CN=C2S1)C1=CC=C(N=C1)C#N	HCC-827		0.041 ± 0.20	0.041	3.43359	FALSE	83.7462	2.79442	FALSE	68.1566	2.54617	FALSE	62.1018	2.90142	FALSE	70.7663
COC1=CC(=CC=N1)C1=CN=C2SC(=NC2=C1)C1=CC=CC(NS(=O)(=O)C2=CC(F)=CC=C2F)=C1C	HCC-827		0.042 ± 0.08	0.042	0.958451	FALSE	22.8203	2.53911	FALSE	60.4551	2.44442	FALSE	58.2004	2.60961	FALSE	62.1335
CC1=C(NS(=O)(=O)C2=CC(F)=CC=C2F)C=CC=C1C1=NC2=CC(=CN=C2S1)C1=CN=C(N)N=C1	HCC-827		0.010 ± 0.22	0.01	4.16012	FALSE	416.012	2.74738	FALSE	274.738	1.9992	FALSE	199.92	1.0753	FALSE	107.53
CC1=C(NS(=O)(=O)C2=CC(F)=CC=C2F)C=CC=C1C1=NC2=CC(=CN=C2S1)C1=CC=CS1	HCC-827		0.11 ± 0.40	0.11	2.04194	FALSE	18.5631	2.79317	FALSE	25.3924	3.11746	FALSE	28.3406	3.15819	FALSE	28.7108
CC(=O)C1=CC=C(C=C1)C1=CN=C2SC(=NC2=C1)C1=CC=CC(NS(=O)(=O)C2=CC(F)=CC=C2F)=C1C	HCC-827		0.56 ± 0.02	0.56	1.48085	FALSE	2.64438	2.67077	FALSE	4.76923	2.76965	FALSE	4.9458	2.47094	TRUE	4.4124
CC1=C(NS(=O)(=O)C2=CC(F)=CC=C2F)C=CC=C1C1=NC2=CC(CN3CCOCC3)=CN=C2S1	HCC-827		0.42 ± 0.22	0.42	1.90324	FALSE	4.53151	1.55128	FALSE	3.69351	2.65141	FALSE	6.31288	0.824317	FALSE	1.96266
CC1=C(NS(=O)(=O)C2=CC(F)=CC=C2F)C=CC=C1C1=NC2=CC(CN3CCCC3)=CN=C2S1	HCC-827		0.49 ± 0.40	0.49	1.94894	FALSE	3.97742	1.67854	TRUE	3.42559	4.60642	FALSE	9.40085	2.11488	FALSE	4.31609
CN1CCN(CC2=CN=C3SC(=NC3=C2)C2=CC=CC(NS(=O)(=O)C3=CC(F)=CC=C3F)=C2C)CC1	HCC-827		0.52 ± 0.14	0.52	3.68573	FALSE	7.08795	1.89023	FALSE	3.63505	1.71476	FALSE	3.29762	0.971999	FALSE	1.86923
CCC1=CN=C2SC(=NC2=C1)C1=CC=CC(NS(=O)(=O)C2=CC(F)=CC=C2F)=C1C	HCC-827		0.70 ± 0.30	0.7	1.90921	FALSE	2.72744	2.63455	FALSE	3.76364	1.96167	FALSE	2.80238	2.2171	FALSE	3.16729
CC1=C(NS(=O)(=O)C2=CC(F)=CC=C2F)C=CC=C1C1=NC2=CC(=CN=C2S1)C#N	HCC-827		0.094 ± 0.24	0.094	0.938579	FALSE	9.98488	3.14895	FALSE	33.4994	1.81247	FALSE	19.2815	4.09514	FALSE	43.5653
COC1=CC=C(F)C=C1S(=O)(=O)NC1=C(C)C(=CC=C1)C1=NC2=CC(=CN=C2S1)C1=CN=CC=C1	HCC-827		6.01 ± 0.09	6.01	2.97391	FALSE	0.494828	3.99599	FALSE	0.66489	3.3425	FALSE	0.556156	3.87521	TRUE	0.644794
COC1=CC=CC(=C1)C1=CN=C2SC(=NC2=C1)C1=CC=CC(NS(=O)(=O)C2=CC(F)=CC=C2OC)=C1C	HCC-827		6.21 ± 0.30	6.21	3.63794	FALSE	0.585819	2.88676	FALSE	0.464856	1.86295	FALSE	0.299992	6.48052	FALSE	1.04356
COC1=CC=C(F)C=C1S(=O)(=O)NC1=C(C)C(=CC=C1)C1=NC2=CC(=CN=C2S1)C1=CC=CN=C1OC	HCC-827		4.40 ± 0.04	4.4	1.76813	FALSE	0.401849	4.02532	FALSE	0.914845	2.55665	FALSE	0.581057	7.34192	FALSE	1.66862
COC1=CC=C(F)C=C1S(=O)(=O)NC1=C(C)C(=CC=C1)C1=NC2=CC(=CN=C2S1)C1=CC(=CC=C1)C(F)(F)F	HCC-827		6.02 ± 0.15	6.02	3.4852	FALSE	0.578937	4.88617	FALSE	0.811656	4.81776	FALSE	0.800293	8.33947	FALSE	1.38529
COC1=CC=C(F)C=C1S(=O)(=O)NC1=C(C)C(=CC=C1)C1=NC2=CC(=CN=C2S1)C1=NNC=C1	HCC-827		5.01 ± 0.09	5.01	2.56908	FALSE	0.512789	4.24427	FALSE	0.84716	2.56348	FALSE	0.511672	2.28553	FALSE	0.456195
COC1=CC=C(F)C=C1S(=O)(=O)NC1=C(C)C(=CC=C1)C1=NC2=CC(=CN=C2S1)C1=CC=CC=C1	HCC-827		6.08 ± 0.40	6.08	3.3179	FALSE	0.545707	4.88093	TRUE	0.802785	3.60164	FALSE	0.592375	4.16368	FALSE	0.684816
COC1=CC=C(F)C=C1S(=O)(=O)NC1=C(C)C(=CC=C1)C1=NC2=CC(=CN=C2S1)C1=CN=CN=C1	HCC-827		4.33 ± 0.10	4.33	2.51242	FALSE	0.580235	3.9707	FALSE	0.917021	2.16274	FALSE	0.499478	3.01802	TRUE	0.697002
COC1=CC(=CC=N1)C1=CN=C2SC(=NC2=C1)C1=CC=CC(NS(=O)(=O)C2=CC(F)=CC=C2OC)=C1C	HCC-827		4.42 ± 0.33	4.42	3.11197	FALSE	0.704067	2.60466	FALSE	0.58929	1.75917	FALSE	0.398003	5.02487	TRUE	1.13685
COC1=CC=C(F)C=C1S(=O)(=O)NC1=C(C)C(=CC=C1)C1=NC2=CC(=CN=C2S1)C1=CC=C(N=C1)C#N	HCC-827		4.38 ± 0.40	4.38	0.155716	FALSE	0.0355517	4.14102	TRUE	0.945438	2.21921	FALSE	0.506668	5.05916	TRUE	1.15506
COC1=CC=C(F)C=C1S(=O)(=O)NC1=C(C)C(=CC=C1)C1=NC2=CC(=CN=C2S1)C1=CC=CS1	HCC-827		4.88 ± 0.18	4.88	1.88013	FALSE	0.385272	4.32415	FALSE	0.886097	2.73227	FALSE	0.559892	5.41406	FALSE	1.10944
COC1=CC=C(F)C=C1S(=O)(=O)NC1=C(C)C(=CC=C1)C1=NC2=CC(=CN=C2S1)C1=CC=C(C=C1)C(C)=O	HCC-827		6.14 ± 0.36	6.14	1.58601	FALSE	0.258308	4.78238	FALSE	0.77889	2.28192	FALSE	0.371648	4.43	FALSE	0.721499
COC1=CC=C(F)C=C1S(=O)(=O)NC1=C(C)C(=CC=C1)C1=NC2=CC(=CN=C2S1)C1=CN=C(N)N=C1	HCC-827		4.31 ± 0.20	4.31	0.316607	FALSE	0.0734587	4.12176	TRUE	0.956326	1.34395	FALSE	0.311822	2.23133	FALSE	0.517711
COC1=CC=C(F)C=C1S(=O)(=O)NC1=C(C)C(=CC=C1)C1=NC2=CC(=CN=C2S1)C1=CC=C(N=C1)C(F)(F)F	HCC-827		4.36 ± 0.14	4.36	3.52398	FALSE	0.808253	3.65398	FALSE	0.838068	4.20603	TRUE	0.964687	8.06715	FALSE	1.85026
COC1=CC=C(F)C=C1S(=O)(=O)NC1=C(C)C(=CC=C1)C1=NC2=CC(CN3CCN(C)CC3)=CN=C2S1	HCC-827		4.50 ± 0.23	4.5	1.05947	FALSE	0.235439	2.12054	FALSE	0.471231	0.440319	FALSE	0.0978486	2.03074	FALSE	0.451275
COC1=CC=C(F)C=C1S(=O)(=O)NC1=C(C)C(=CC=C1)C1=NC2=CC(CN3CCOCC3)=CN=C2S1	HCC-827		4.61 ± 0.08	4.61	2.99326	FALSE	0.649297	2.48377	FALSE	0.53878	0.835553	FALSE	0.181248	1.77287	TRUE	0.384571
COC1=CC=C(F)C=C1S(=O)(=O)NC1=C(C)C(=CC=C1)C1=NC2=CC(=CN=C2S1)C#N	HCC-827		6.11 ± 0.36	6.11	0.199321	FALSE	0.032622	5.07417	TRUE	0.830469	1.78391	FALSE	0.291965	6.68723	FALSE	1.09447
NC1CCN(C1)C(=O)C1=CC2=C(O)C3=C(C(O)=C2N1)C(=O)C1=C(C=CC=C1)C3=O	A549	905949	7.7 ± 1.1	7.7	0.0201666	FALSE	0.00261904	2.20343	FALSE	0.286159	4.68926	TRUE	0.608994	2.95707	FALSE	0.384035
N[C@H]1CCN(C1)C(=O)C1=CC2=C(O)C3=C(C(O)=C2N1)C(=O)C1=C(C=CC=C1)C3=O				7.7	0.0487712	FALSE	0.00633392	2.02905	FALSE	0.263513	5.00745	TRUE	0.650318	3.07406	TRUE	0.399229
NC1CCN(C1)C(=O)C1=CC2=C(O)C3=C(C(O)=C2C1)C(=O)C1=C(C=CC=C1)C3=O	A549		4.3 ± 0.6	4.3	0.0160121	FALSE	0.00372374	2.36832	FALSE	0.550771	4.72162	TRUE	1.09805	3.18738	TRUE	0.741252
N[C@@H]1CCN(C1)C(=O)C1=CC2=C(O)C3=C(C(O)=C2C1)C(=O)C1=C(C=CC=C1)C3=O				4.3	0.0186196	FALSE	0.00433014	2.28879	FALSE	0.532277	5.33385	TRUE	1.24043	2.57076	FALSE	0.59785
OC1=C2CC(=CC2=C(O)C2=C1C(=O)C1=C(C=CC=C1)C2=O)C(=O)N[C@@H]1CCNC1	A549		4.3 ± 0.5	4.3	0.0695544	FALSE	0.0161754	3.55039	TRUE	0.825673	1.38379	FALSE	0.321812	2.22154	FALSE	0.516637
OC1=C2CC(=CC2=C(O)C2=C1C(=O)C1=C(C=CC=C1)C2=O)C(=O)NC1CCNC1	A549		4.0 ± 0.5	4	0.0921806	FALSE	0.0230451	5.35319	TRUE	1.3383	1.27678	FALSE	0.319194	1.26112	TRUE	0.31528
OC1=C2CC(=CC2=C(O)C2=C1C(=O)C1=C(C=CC=C1)C2=O)C(=O)N[C@H]1CCNC1				4	0.0820938	FALSE	0.0205235	3.50555	TRUE	0.876387	1.38379	FALSE	0.345947	2.5723	FALSE	0.643075
OC1=C2CC(=CC2=C(O)C2=C1C(=O)C1=C(C=CC=C1)C2=O)C(=O)NC1CCCNC1	A549		4.2 ± 0.5	4.2	0.193224	FALSE	0.0460058	5.32567	TRUE	1.26802	1.29892	FALSE	0.309266	1.54003	FALSE	0.366673
OC1=C2CC(=CC2=C(O)C2=C1C(=O)C1=C(C=CC=C1)C2=O)C(=O)NC1CCNCC1	A549		9.0 ± 1.3	9	0.350653	FALSE	0.0389615	5.32719	TRUE	0.59191	1.20741	FALSE	0.134157	1.48349	FALSE	0.164833
NC1CCCN(C1)C(=O)C1=CC2=C(O)C3=C(C(O)=C2C1)C(=O)C1=C(C=CC=C1)C3=O	A549		1.2 ± 0.2	1.2	0.144131	FALSE	0.120109	2.64629	FALSE	2.20524	4.8261	FALSE	4.02175	2.04746	TRUE	1.70622
OC1=C2CC(=CC2=C(O)C2=C1C(=O)C1=C(C=CC=C1)C2=O)C(=O)N1CCCCC1	A549		4.4 ± 0.6	4.4	0.243846	FALSE	0.0554196	6.82972	FALSE	1.55221	4.61861	TRUE	1.04968	4.60803	FALSE	1.04728
COC1=CC2=C(C=C1OC)C(=C1C(=O)OCC1=C2OCC1=CN(N=N1)C1OC(C)C(OC(C)=O)C(OC(C)=O)C1OC(C)=O)C1=CC=C2OCOC2=C1	PA-TU-8988T		0.163 ± 0.009	0.163	1.65721	FALSE	10.1669	2.70761	FALSE	16.6111	0.317338	FALSE	1.94686	1.01207	FALSE	6.20903
COC1=CC2=C(C=C1OC)C(=C1C(=O)OCC1=C2OCC1=CN(N=N1)[C@H]1O[C@@H](C)[C@H](OC(C)=O)[C@@H](OC(C)=O)[C@H]1OC(C)=O)C1=CC=C2OCOC2=C1				0.163	2.15871	FALSE	13.2436	1.83981	FALSE	11.2872	0.818191	FALSE	5.01958	1.85893	FALSE	11.4045
COC1=C(OC)C=C2C(=C1)C(OCCCC1=CN(N=N1)C1OC(C)C(OC(C)=O)C(OC(C)=O)C1OC(C)=O)=C1COC(=O)C1=C2C1=CC=C2OCOC2=C1	PA-TU-8988T		0.024 ± 0.002	0.024	1.91286	FALSE	79.7026	1.56982	FALSE	65.4094	0.772498	FALSE	32.1874	1.14339	FALSE	47.6414
COC1=C(OC)C=C2C(=C1)C(OCCCC1=CN(N=N1)[C@H]1O[C@@H](C)[C@H](OC(C)=O)[C@@H](OC(C)=O)[C@H]1OC(C)=O)=C1COC(=O)C1=C2C1=CC=C2OCOC2=C1				0.024	2.26983	FALSE	94.5762	0.85901	FALSE	35.7921	1.12141	FALSE	46.7255	2.07218	FALSE	86.3407
COC1=C(OC)C=C2C(=C1)C(OCCOCC1=CN(N=N1)C1OC(C)C(OC(C)=O)C(OC(C)=O)C1OC(C)=O)=C1COC(=O)C1=C2C1=CC=C2OCOC2=C1	PA-TU-8988T		0.766 ± 0.056	0.766	2.00467	FALSE	2.61706	1.55277	FALSE	2.02711	0.656698	TRUE	0.857308	1.42789	FALSE	1.86409
COC1=C(OC)C=C2C(=C1)C(OCCOCC1=CN(N=N1)[C@H]1O[C@@H](C)[C@H](OC(C)=O)[C@@H](OC(C)=O)[C@H]1OC(C)=O)=C1COC(=O)C1=C2C1=CC=C2OCOC2=C1				0.766	2.22699	FALSE	2.9073	0.840871	TRUE	1.09774	1.09773	FALSE	1.43306	2.51431	FALSE	3.28239
COC1=C(C=C2C(C(NC(OC(C)(C)C)=O)=C3COC(C3=C2C4=CC=C5OCOC5=C4)=O)=C1)OC	PA-TU-8988T		0.088 ± 0.006	0.088	0.13598	FALSE	1.54523	0.441331	FALSE	5.01512	0.665847	FALSE	7.56644	1.8999	FALSE	21.5897
COC1=C(OC)C=C2C(=C1)C(N)=C1COC(=O)C1=C2C1=CC=C2OCOC2=C1	PA-TU-8988T		0.037 ± 0.002	0.037	0.277162	FALSE	7.49087	1.99215	FALSE	53.842	0.728814	FALSE	19.6977	1.96718	FALSE	53.167
CC1=C(N)C=CC=C1C2=NC3=CC=CN=C3S2	NCI-H1975	924244	12.69 ± 0.18	12.69	6.49371	FALSE	0.511719	2.17705	FALSE	0.171556	0.961781	FALSE	0.0757904	6.87987	FALSE	0.542149
CC1=C(NS(=O)(C2=CN=CC=C2)=O)C=CC=C1C3=NC4=CC=CN=C4S3	NCI-H1975		3.06 ± 0.08	3.06	3.61276	FALSE	1.18064	0.573775	FALSE	0.187508	4.31194	FALSE	1.40913	4.94116	TRUE	1.61476
CC1=C(NS(=O)(C2CCOCC2)=O)C=CC=C1C3=NC4=CC=CN=C4S3	NCI-H1975		3.12 ± 0.23	3.12	3.80535	TRUE	1.21966	1.31709	FALSE	0.422143	2.73039	TRUE	0.875126	3.75467	TRUE	1.20342
CC1=C(NS(=O)(C2=CN(C)N=C2)=O)C=CC=C1C3=NC4=CC=CN=C4S3	NCI-H1975		3.30 ± 0.32	3.3	4.32822	FALSE	1.31158	1.33345	FALSE	0.404076	5.84882	FALSE	1.77237	2.99337	FALSE	0.907082
CC1=C(NS(=O)(C2=CC(F)=CC=C2F)=O)C=CC=C1C3=NC4=CC=CN=C4S3	NCI-H1975		1.09 ± 0.29	1.09	4.2272	FALSE	3.87817	0.658524	TRUE	0.60415	4.38335	FALSE	4.02142	2.69932	FALSE	2.47644
CC1=C(NS(=O)(C2=CC=CC=C2)=O)C=CC=C1C3=NC4=CC=CN=C4S3	NCI-H1975		3.32 ± 0.36	3.32	4.0982	TRUE	1.2344	1.72846	FALSE	0.52062	3.47846	TRUE	1.04773	5.29943	TRUE	1.59622
CC1=C(NS(=O)(CC2=CC=CC=C2)=O)C=CC=C1C3=NC4=CC=CN=C4S3	NCI-H1975		3.41 ± 0.24	3.41	4.96389	FALSE	1.45569	1.6556	FALSE	0.485514	3.68437	TRUE	1.08046	3.75542	FALSE	1.1013
CC1=C(NS(=O)(C2=CC=C(F)C=C2F)=O)C=CC=C1C3=NC4=CC=CN=C4S3	NCI-H1975		2.11 ± 0.08	2.11	4.81011	FALSE	2.27967	1.57974	FALSE	0.74869	4.32587	FALSE	2.05018	3.77878	FALSE	1.79089
CC1=C(NS(=O)(C2=C(OC(F)(F)F)C=CC=C2)=O)C=CC=C1C3=NC4=CC=CN=C4S3	NCI-H1975		2.18 ± 0.37	2.18	6.96477	FALSE	3.19485	0.623022	FALSE	0.28579	3.45481	FALSE	1.58477	3.90087	FALSE	1.78939
CC1=C(NS(=O)(C2=CC(Cl)=CC=C2)=O)C=CC=C1C3=NC4=CC=CN=C4S3	NCI-H1975		2.21 ± 0.11	2.21	4.5331	FALSE	2.05118	0.676761	FALSE	0.306227	4.38284	FALSE	1.98318	4.10826	FALSE	1.85894
CC1=C(NS(=O)(C2=CC(C#N)=C(F)C=C2)=O)C=CC=C1C3=NC4=CC=CN=C4S3	NCI-H1975		2.10 ± 0.32	2.1	6.61819	FALSE	3.15152	0.753497	FALSE	0.358808	5.6046	FALSE	2.66886	5.38814	FALSE	2.56578
CC1=C(NS(=O)(=O)C2=CC(F)=CC=C2F)C=CC=C1C1=NC2=CC(=CN=C2S1)C1=CC(=CC=C1)C(F)(F)F	NCI-H1975		0.26 ± 0.02	0.26	4.29159	FALSE	16.5061	3.37767	FALSE	12.991	3.03231	FALSE	11.6627	6.53387	FALSE	25.1303
COC1=C(C2=CC3=C(SC(C4=C(C)C(NS(=O)(C5=C(F)C=CC(F)=C5)=O)=CC=C4)=N3)N=C2)C=CC=N1	NCI-H1975		0.15 ± 0.10	0.15	3.69598	FALSE	24.6399	1.5442	FALSE	10.2946	4.23715	FALSE	28.2476	5.23517	FALSE	34.9012
CSC1=NC=C(C=N1)C1=CN=C2SC(=NC2=C1)C1=CC=CC(NS(=O)(=O)C2=CC(F)=CC=C2F)=C1C	NCI-H1975		0.09 ± 0.30	0.09	3.76679	FALSE	41.8533	2.42731	FALSE	26.9701	3.0458	FALSE	33.8422	1.78604	FALSE	19.8449
COC1=CC=CC(=C1)C1=CN=C2SC(=NC2=C1)C1=CC=CC(NS(=O)(=O)C2=CC(F)=CC=C2F)=C1C	NCI-H1975		0.34 ± 0.21	0.34	4.94327	FALSE	14.539	2.79037	FALSE	8.20696	2.78647	FALSE	8.19551	4.479	FALSE	13.1735
CC1=C(NS(=O)(=O)C2=CC(F)=CC=C2F)C=CC=C1C1=NC2=CC(=CN=C2S1)C1=CC=C(N=C1)C(F)(F)F	NCI-H1975		0.22 ± 0.16	0.22	4.33779	FALSE	19.7172	2.4957	FALSE	11.3441	3.32565	FALSE	15.1166	6.28019	FALSE	28.5463
CC1=C(NS(=O)(=O)C2=CC(F)=CC=C2F)C=CC=C1C1=NC2=CC(=CN=C2S1)C1=NNC=C1	NCI-H1975		0.30 ± 0.40	0.3	2.36515	FALSE	7.88385	2.71168	FALSE	9.03892	4.50905	FALSE	15.0302	2.08715	FALSE	6.95717
CC1=C(NS(=O)(=O)C2=CC(F)=CC=C2F)C=CC=C1C1=NC2=CC(=CN=C2S1)C1=CC=CC=C1	NCI-H1975		0.22 ± 0.23	0.22	2.3656	FALSE	10.7527	3.18404	FALSE	14.4729	3.00122	FALSE	13.6419	2.92531	FALSE	13.2969
CC1=C(NS(=O)(=O)C2=CC(F)=CC=C2F)C=CC=C1C1=NC2=CC(=CN=C2S1)C1=CN=CN=C1	NCI-H1975		0.11 ± 0.04	0.11	2.01832	FALSE	18.3483	2.56471	FALSE	23.3155	3.94965	FALSE	35.9059	2.02993	FALSE	18.4539
CC1=C(NS(=O)(=O)C2=CC(F)=CC=C2F)C=CC=C1C1=NC2=CC(=CN=C2S1)C1=CC=C(N=C1)C#N	NCI-H1975		0.12 ± 0.30	0.12	2.1698	FALSE	18.0816	2.76653	FALSE	23.0544	2.62677	FALSE	21.8897	3.66416	FALSE	30.5347
COC1=CC(=CC=N1)C1=CN=C2SC(=NC2=C1)C1=CC=CC(NS(=O)(=O)C2=CC(F)=CC=C2F)=C1C	NCI-H1975		0.18 ± 0.40	0.18	4.57193	FALSE	25.3996	2.51377	FALSE	13.9654	3.51884	FALSE	19.5491	3.32277	FALSE	18.4599
CC1=C(NS(=O)(=O)C2=CC(F)=CC=C2F)C=CC=C1C1=NC2=CC(=CN=C2S1)C1=CN=C(N)N=C1	NCI-H1975		0.08 ± 0.35	0.08	2.26328	FALSE	28.2911	2.71996	FALSE	33.9995	3.73947	FALSE	46.7434	1.45674	FALSE	18.2092
CC1=C(NS(=O)(=O)C2=CC(F)=CC=C2F)C=CC=C1C1=NC2=CC(=CN=C2S1)C1=CC=CS1	NCI-H1975		0.30 ± 0.19	0.3	2.2784	FALSE	7.59467	2.76529	FALSE	9.21764	4.51428	FALSE	15.0476	3.9622	FALSE	13.2073
CC(=O)C1=CC=C(C=C1)C1=CN=C2SC(=NC2=C1)C1=CC=CC(NS(=O)(=O)C2=CC(F)=CC=C2F)=C1C	NCI-H1975		0.36 ± 0.37	0.36	5.60035	FALSE	15.5565	2.64411	FALSE	7.34475	3.25506	FALSE	9.04183	3.15882	FALSE	8.77451
CC1=C(NS(=O)(=O)C2=CC(F)=CC=C2F)C=CC=C1C1=NC2=CC(CN3CCOCC3)=CN=C2S1	NCI-H1975		0.46 ± 0.08	0.46	2.04374	FALSE	4.44291	1.53528	FALSE	3.33756	2.49338	FALSE	5.4204	1.13542	FALSE	2.4683
CC1=C(NS(=O)(=O)C2=CC(F)=CC=C2F)C=CC=C1C1=NC2=CC(CN3CCCC3)=CN=C2S1	NCI-H1975		0.52 ± 0.20	0.52	1.48261	FALSE	2.85118	1.66123	FALSE	3.19467	4.36749	FALSE	8.39901	2.73519	TRUE	5.25998
CN1CCN(CC2=CN=C3SC(=NC3=C2)C2=CC=CC(NS(=O)(=O)C3=CC(F)=CC=C3F)=C2C)CC1	NCI-H1975		0.77 ± 0.22	0.77	2.28344	FALSE	2.96551	1.87123	FALSE	2.43018	3.45146	FALSE	4.48241	1.32498	FALSE	1.72076
CCC1=CN=C2SC(=NC2=C1)C1=CC=CC(NS(=O)(=O)C2=CC(F)=CC=C2F)=C1C	NCI-H1975		0.42 ± 0.24	0.42	6.2851	FALSE	14.9645	2.60825	FALSE	6.21013	2.36669	FALSE	5.63497	2.85765	FALSE	6.80393
CC1=C(NS(=O)(=O)C2=CC(F)=CC=C2F)C=CC=C1C1=NC2=CC(=CN=C2S1)C#N	NCI-H1975		0.28 ± 0.40	0.28	2.40104	FALSE	8.57513	3.11752	FALSE	11.134	4.14651	FALSE	14.809	5.03091	FALSE	17.9675
COC1=CC=C(F)C=C1S(=O)(=O)NC1=C(C)C(=CC=C1)C1=NC2=CC(=CN=C2S1)C1=CN=CC=C1	NCI-H1975		6.19 ± 0.33	6.19	2.91643	FALSE	0.471152	3.95611	FALSE	0.639113	3.18092	FALSE	0.513881	4.78267	FALSE	0.772645
COC1=CC=CC(=C1)C1=CN=C2SC(=NC2=C1)C1=CC=CC(NS(=O)(=O)C2=CC(F)=CC=C2OC)=C1C	NCI-H1975		7.10 ± 0.10	7.1	3.58781	FALSE	0.505325	2.85794	FALSE	0.402527	2.32857	FALSE	0.327968	7.65684	FALSE	1.07843
COC1=CC=C(F)C=C1S(=O)(=O)NC1=C(C)C(=CC=C1)C1=NC2=CC(=CN=C2S1)C1=CC=CN=C1OC	NCI-H1975		4.55 ± 0.35	4.55	2.66181	FALSE	0.585012	3.98514	TRUE	0.875855	2.9965	FALSE	0.658573	8.57799	FALSE	1.88527
COC1=CC=C(F)C=C1S(=O)(=O)NC1=C(C)C(=CC=C1)C1=NC2=CC(=CN=C2S1)C1=CC(=CC=C1)C(F)(F)F	NCI-H1975		6.11 ± 0.21	6.11	6.34099	TRUE	1.03781	4.83703	FALSE	0.791658	2.88794	FALSE	0.472658	9.63305	FALSE	1.5766
COC1=CC=C(F)C=C1S(=O)(=O)NC1=C(C)C(=CC=C1)C1=NC2=CC(=CN=C2S1)C1=NNC=C1	NCI-H1975		4.89 ± 0.37	4.89	1.99593	FALSE	0.408166	4.20191	TRUE	0.859287	3.55176	FALSE	0.72633	2.9388	FALSE	0.600981
COC1=CC=C(F)C=C1S(=O)(=O)NC1=C(C)C(=CC=C1)C1=NC2=CC(=CN=C2S1)C1=CC=CC=C1	NCI-H1975		6.20 ± 0.08	6.2	3.34083	FALSE	0.538844	4.83186	FALSE	0.779332	2.35998	FALSE	0.380643	5.10898	TRUE	0.824029
COC1=CC=C(F)C=C1S(=O)(=O)NC1=C(C)C(=CC=C1)C1=NC2=CC(=CN=C2S1)C1=CN=CN=C1	NCI-H1975		4.38 ± 0.32	4.38	2.34468	FALSE	0.535315	3.93107	TRUE	0.897504	3.07355	FALSE	0.701724	3.79924	FALSE	0.867405
COC1=CC(=CC=N1)C1=CN=C2SC(=NC2=C1)C1=CC=CC(NS(=O)(=O)C2=CC(F)=CC=C2OC)=C1C	NCI-H1975		4.56 ± 0.23	4.56	3.30225	FALSE	0.724177	2.57866	FALSE	0.565497	2.61911	FALSE	0.574365	6.06904	FALSE	1.33093
COC1=CC=C(F)C=C1S(=O)(=O)NC1=C(C)C(=CC=C1)C1=NC2=CC(=CN=C2S1)C1=CC=C(N=C1)C#N	NCI-H1975		4.50 ± 0.24	4.5	1.24883	FALSE	0.277517	4.09968	TRUE	0.911041	2.09377	FALSE	0.465281	6.108	FALSE	1.35733
COC1=CC=C(F)C=C1S(=O)(=O)NC1=C(C)C(=CC=C1)C1=NC2=CC(=CN=C2S1)C1=CC=CS1	NCI-H1975		4.72 ± 0.20	4.72	2.28686	FALSE	0.484504	4.28099	TRUE	0.906989	3.30381	FALSE	0.69996	6.49739	FALSE	1.37656
COC1=CC=C(F)C=C1S(=O)(=O)NC1=C(C)C(=CC=C1)C1=NC2=CC(=CN=C2S1)C1=CC=C(C=C1)C(C)=O	NCI-H1975		6.30 ± 0.14	6.3	3.43481	FALSE	0.545208	4.73464	FALSE	0.751531	2.45564	FALSE	0.389784	5.40757	FALSE	0.858345
COC1=CC=C(F)C=C1S(=O)(=O)NC1=C(C)C(=CC=C1)C1=NC2=CC(=CN=C2S1)C1=CN=C(N)N=C1	NCI-H1975		4.14 ± 0.33	4.14	3.86391	TRUE	0.933312	4.08062	TRUE	0.985658	2.20964	FALSE	0.53373	2.87427	FALSE	0.694269
COC1=CC=C(F)C=C1S(=O)(=O)NC1=C(C)C(=CC=C1)C1=NC2=CC(=CN=C2S1)C1=CC=C(N=C1)C(F)(F)F	NCI-H1975		4.44 ± 0.30	4.44	6.04557	FALSE	1.36162	3.61751	TRUE	0.814755	3.11132	FALSE	0.700747	9.34648	FALSE	2.10506
COC1=CC=C(F)C=C1S(=O)(=O)NC1=C(C)C(=CC=C1)C1=NC2=CC(CN3CCN(C)CC3)=CN=C2S1	NCI-H1975		4.60 ± 0.18	4.6	3.09711	FALSE	0.673284	2.09922	FALSE	0.456353	1.89296	FALSE	0.411513	2.63425	FALSE	0.572664
COC1=CC=C(F)C=C1S(=O)(=O)NC1=C(C)C(=CC=C1)C1=NC2=CC(CN3CCOCC3)=CN=C2S1	NCI-H1975		4.70 ± 0.22	4.7	1.66093	FALSE	0.35339	2.45898	FALSE	0.523188	1.99703	FALSE	0.4249	2.3224	FALSE	0.494127
COC1=CC=C(F)C=C1S(=O)(=O)NC1=C(C)C(=CC=C1)C1=NC2=CC(=CN=C2S1)C#N	NCI-H1975		6.25 ± 0.29	6.25	0.332446	FALSE	0.0531914	5.02314	FALSE	0.803702	3.5817	FALSE	0.573072	7.87899	FALSE	1.26064
NC1CCN(C1)C(=O)C1=CC2=C(O)C3=C(C(O)=C2N1)C(=O)C1=C(C=CC=C1)C3=O	K-562	905940	0.5 ± 0.1	0.5	0.0863121	FALSE	0.172624	1.95608	FALSE	3.91215	5.08346	FALSE	10.1669	4.66739	FALSE	9.33478
N[C@H]1CCN(C1)C(=O)C1=CC2=C(O)C3=C(C(O)=C2N1)C(=O)C1=C(C=CC=C1)C3=O				0.5	0.22262	TRUE	0.445241	1.80181	FALSE	3.60362	5.354	FALSE	10.708	4.82205	FALSE	9.64411
NC1CCN(C1)C(=O)C1=CC2=C(O)C3=C(C(O)=C2C1)C(=O)C1=C(C=CC=C1)C3=O	K-562		1.3 ± 0.2	1.3	0.0708762	FALSE	0.0545202	2.10264	FALSE	1.61742	4.96577	FALSE	3.81982	4.97189	FALSE	3.82453
N[C@@H]1CCN(C1)C(=O)C1=CC2=C(O)C3=C(C(O)=C2C1)C(=O)C1=C(C=CC=C1)C3=O				1.3	0.121505	FALSE	0.0934654	2.0316	FALSE	1.56277	5.19185	FALSE	3.99373	4.14706	TRUE	3.19005
OC1=C2CC(=CC2=C(O)C2=C1C(=O)C1=C(C=CC=C1)C2=O)C(=O)N[C@@H]1CCNC1	K-562		3.5 ± 0.5	3.5	0.296062	FALSE	0.084589	3.15033	TRUE	0.900093	1.9841	FALSE	0.566885	3.66343	TRUE	1.04669
OC1=C2CC(=CC2=C(O)C2=C1C(=O)C1=C(C=CC=C1)C2=O)C(=O)NC1CCNC1	K-562		2.3 ± 0.3	2.3	0.2773	FALSE	0.120565	4.75344	FALSE	2.06671	1.89529	TRUE	0.824041	2.25511	FALSE	0.980484
OC1=C2CC(=CC2=C(O)C2=C1C(=O)C1=C(C=CC=C1)C2=O)C(=O)N[C@H]1CCNC1				2.3	0.356084	FALSE	0.154819	3.11103	TRUE	1.35262	1.9841	TRUE	0.862653	4.14872	TRUE	1.80379
OC1=C2CC(=CC2=C(O)C2=C1C(=O)C1=C(C=CC=C1)C2=O)C(=O)NC1CCCNC1	K-562		1.8 ± 0.3	1.8	0.109694	FALSE	0.0609413	4.72918	FALSE	2.62732	1.79449	TRUE	0.996937	2.67888	FALSE	1.48827
OC1=C2CC(=CC2=C(O)C2=C1C(=O)C1=C(C=CC=C1)C2=O)C(=O)NC1CCNCC1	K-562		1.2 ± 0.2	1.2	0.185488	FALSE	0.154573	4.73053	FALSE	3.94211	1.76184	TRUE	1.4682	2.594	FALSE	2.16166
NC1CCCN(C1)C(=O)C1=CC2=C(O)C3=C(C(O)=C2C1)C(=O)C1=C(C=CC=C1)C3=O	K-562		1.2 ± 0.2	1.2	0.0450261	FALSE	0.0375218	2.35159	FALSE	1.95966	4.4278	FALSE	3.68983	3.41781	FALSE	2.84818
OC1=C2CC(=CC2=C(O)C2=C1C(=O)C1=C(C=CC=C1)C2=O)C(=O)N1CCCCC1	K-562		1.0 ± 0.2	1	0.453194	TRUE	0.453194	6.06152	FALSE	6.06152	4.65385	FALSE	4.65385	6.76796	FALSE	6.76796
COC1=CC2=C(C=C1OC)C(=C1C(=O)OCC1=C2OCC1=CN(N=N1)C1OC(C)C(OC(C)=O)C(OC(C)=O)C1OC(C)=O)C1=CC=C2OCOC2=C1	CFPAC-1	906821	0.097 ± 0.007	0.097	1.886	FALSE	19.4433	3.08377	FALSE	31.7915	1.14704	FALSE	11.8252	0.988072	FALSE	10.1863
COC1=CC2=C(C=C1OC)C(=C1C(=O)OCC1=C2OCC1=CN(N=N1)[C@H]1O[C@@H](C)[C@H](OC(C)=O)[C@@H](OC(C)=O)[C@H]1OC(C)=O)C1=CC=C2OCOC2=C1				0.097	2.29378	FALSE	23.6472	2.09184	FALSE	21.5654	1.51117	FALSE	15.5791	1.82066	FALSE	18.7697
COC1=C(OC)C=C2C(=C1)C(OCCCC1=CN(N=N1)C1OC(C)C(OC(C)=O)C(OC(C)=O)C1OC(C)=O)=C1COC(=O)C1=C2C1=CC=C2OCOC2=C1	CFPAC-1		0.007 ± 0.001	0.007	2.22862	FALSE	318.374	1.79636	FALSE	256.623	1.45117	FALSE	207.309	1.11695	FALSE	159.564
COC1=C(OC)C=C2C(=C1)C(OCCCC1=CN(N=N1)[C@H]1O[C@@H](C)[C@H](OC(C)=O)[C@@H](OC(C)=O)[C@H]1OC(C)=O)=C1COC(=O)C1=C2C1=CC=C2OCOC2=C1				0.007	2.64312	FALSE	377.588	1.27417	FALSE	182.024	1.55997	FALSE	222.852	2.03074	FALSE	290.106
COC1=C(OC)C=C2C(=C1)C(OCCOCC1=CN(N=N1)C1OC(C)C(OC(C)=O)C(OC(C)=O)C1OC(C)=O)=C1COC(=O)C1=C2C1=CC=C2OCOC2=C1	CFPAC-1		0.050 ± 0.009	0.05	2.54142	FALSE	50.8285	1.77724	FALSE	35.5448	1.50586	FALSE	30.1173	1.39654	FALSE	27.9309
COC1=C(OC)C=C2C(=C1)C(OCCOCC1=CN(N=N1)[C@H]1O[C@@H](C)[C@H](OC(C)=O)[C@@H](OC(C)=O)[C@H]1OC(C)=O)=C1COC(=O)C1=C2C1=CC=C2OCOC2=C1				0.05	2.56796	FALSE	51.3592	1.25982	FALSE	25.1964	1.68706	FALSE	33.7413	2.46699	FALSE	49.3399
COC1=C(C=C2C(C(NC(OC(C)(C)C)=O)=C3COC(C3=C2C4=CC=C5OCOC5=C4)=O)=C1)OC	CFPAC-1		0.037 ± 0.002	0.037	0.214458	FALSE	5.79615	0.701884	FALSE	18.9698	0.898097	FALSE	24.2729	1.86116	FALSE	50.3016
COC1=C(OC)C=C2C(=C1)C(N)=C1COC(=O)C1=C2C1=CC=C2OCOC2=C1	CFPAC-1		0.003 ± 0.002	0.003	0.243603	FALSE	81.2011	2.27494	FALSE	758.314	0.967304	FALSE	322.435	1.92745	FALSE	642.485

## Sheet: DeepCDR_R4
DeepCDR_R4: Random split 4 prediction results
drug/compound	cell_line	Ln(IC50_expt)	Ln(IC50_pred)	IC50_expt (uM)	IC50_pred (uM)	% error IC50	% error LnIC50	Difference factor (for EVAPA)
50869	A673	0.996048	0.60011	2.70756	1.82232	32.7	39.75	0.673
50869	SK-MM-2	1.09772	0.43693	2.99732	1.54795	48.36	60.2	0.516
50869	NCI-H23	0.928289	0.992215	2.53018	2.6972	6.6	6.89	1.066
50869	RPMI-8226	0.859773	0.436673	2.36262	1.54755	34.5	49.21	0.655
50869	YH-13	0.924556	0.535928	2.52075	1.70903	32.2	42.03	0.678
50869	BL-41	0.839028	0.444533	2.31412	1.55976	32.6	47.02	0.674
150412	AGS	0.861639	0.0705088	2.36704	1.07305	54.67	91.82	0.453
150412	ALL-SIL	0.402904	-0.105255	1.49616	0.900095	39.84	126.12	0.602
630600	EC-GI-10	0.334535	0.048794	1.39729	1.05	24.85	85.41	0.751
630600	TE-15	0.301134	0.369704	1.35139	1.44731	7.1	22.77	1.071
630600	HCT-116	-0.029982	0.28896	0.970463	1.33504	37.57	1063.78	1.376
630600	HCT-15	0.495123	0.13306	1.6407	1.14232	30.38	73.13	0.696
630600	639-V	0.64622	0.746646	1.90831	2.10991	10.56	15.54	1.106
630600	697	0.480866	-0.280619	1.61747	0.755316	53.3	158.36	0.467
630600	D-283MED	1.026	0.536339	2.78987	1.70974	38.72	47.73	0.613
630600	HCC1569	-0.614032	0.66992	0.541164	1.95408	261.09	209.1	3.611
630600	HSC-3	0.210781	0.496081	1.23464	1.64227	33.02	135.35	1.33
630600	NOMO-1	0.651396	0.174768	1.91822	1.19097	37.91	73.17	0.621
630600	WM-115	1.00772	0.612044	2.73935	1.8442	32.68	39.26	0.673
630600	BL-41	-0.624927	-0.240573	0.5353	0.786177	46.87	61.5	1.469
630600	Jurkat	1.07214	-0.139862	2.92161	0.869478	70.24	113.05	0.298
630600	DND-41	0.728742	0.301198	2.07247	1.35148	34.79	58.67	0.652
630600	TE-4	1.06309	1.01153	2.8953	2.7498	5.03	4.85	0.95
741909	HCC1954	-1.6641	-1.02345	0.18936	0.359354	89.77	38.5	1.898
741909	A498	-1.94215	-0.519006	0.143395	0.595112	315.01	73.28	4.15
741909	MDA-MB-468	-1.36554	-1.22441	0.255242	0.29393	15.16	10.34	1.152
741909	MES-SA	-2.0943	-0.804251	0.123157	0.447423	263.29	61.6	3.633
741909	NCI-H28	-0.39496	-0.023618	0.673707	0.976659	44.97	94.02	1.45
741909	OS-RC-2	-0.968984	0.826625	0.379468	2.28559	502.31	185.31	6.023
741909	MDA-MB-415	-0.126213	-0.303383	0.881427	0.738316	16.24	140.37	0.838
741909	NUGC-4	-0.70069	0.037334	0.496243	1.03804	109.18	105.33	2.092
743380	COR-L105	-1.31137	-1.41286	0.26945	0.243447	9.65	7.74	0.903
743380	HCC70	-0.467138	-0.996526	0.626794	0.36916	41.1	113.33	0.589
743380	KMS-12-BM	-0.36311	-1.27711	0.69551	0.278841	59.91	251.72	0.401
743380	MDA-MB-361	-1.24144	-1.92509	0.288968	0.145863	49.52	55.07	0.505
743380	MEG-01	-2.76801	-1.14274	0.0627868	0.318943	407.98	58.72	5.08
743380	MES-SA	-1.94806	-1.16648	0.14255	0.311461	118.49	40.12	2.185
743380	OS-RC-2	-0.654517	0.850524	0.519693	2.34087	350.43	229.95	4.504
743380	CW-2	-0.487124	0.510539	0.614391	1.66619	171.19	204.81	2.712
743380	MDA-MB-415	-0.75682	-1.59858	0.469156	0.202184	56.9	111.22	0.431
743380	IGR-37	-2.3473	-1.28317	0.095627	0.277157	189.83	45.33	2.898
743380	EFM-192A	-0.739631	-1.46492	0.47729	0.231098	51.58	98.06	0.484
743380	NCI-H1781	-0.15606	-0.182034	0.855508	0.833573	2.56	16.64	0.974
765771	K-562	1.00093	1.67182	2.72082	5.32183	95.6	67.03	1.956
765771	KYSE-510	0.554879	1.76237	1.74173	5.82621	234.51	217.61	3.345
776928	8-MG-BA	2.75968	2.9863	15.7948	19.8121	25.43	8.21	1.254
776928	DMS-273	2.81749	2.89433	16.7347	18.0714	7.99	2.73	1.08
776928	NCI-H82	2.31564	2.46638	10.1314	11.7798	16.27	6.51	1.163
776928	SBC-5	3.05436	2.52299	21.2076	12.4659	41.22	17.4	0.588
776928	NCI-H2122	3.11358	2.60078	22.5015	13.4742	40.12	16.47	0.599
776928	HCC2157	2.80144	2.67612	16.4683	14.5286	11.78	4.47	0.882
776928	T47D	2.91433	2.82907	18.4365	16.9297	8.17	2.93	0.918
776928	KM12	2.42626	2.84843	11.3165	17.2607	52.53	17.4	1.525
776928	A2058	2.87873	2.8684	17.7917	17.6088	1.03	0.36	0.99
776928	COLO-679	3.02973	2.81749	20.6916	16.7347	19.12	7.01	0.809
776928	DB	2.4633	2.5276	11.7435	12.5235	6.64	2.61	1.066
776928	DU-4475	2.50376	2.69855	12.2283	14.8581	21.51	7.78	1.215
776928	FTC-133	3.17965	2.81807	24.0382	16.7445	30.34	11.37	0.697
776928	GI-1	2.80974	2.92815	16.6056	18.6931	12.57	4.21	1.126
776928	ESS-1	3.03548	2.88836	20.811	17.9639	13.68	4.85	0.863
776928	H4	3.05445	2.30841	21.2096	10.0584	52.58	24.42	0.474
776928	HT-144	2.6388	2.8855	13.9964	17.9124	27.98	9.35	1.28
776928	KP-N-YN	2.91812	2.57221	18.5065	13.0947	29.24	11.85	0.708
776928	MEL-JUSO	3.19544	2.5516	24.421	12.8276	47.47	20.15	0.525
776928	MKN1	3.14931	2.80437	23.3199	16.5167	29.17	10.95	0.708
776928	NAMALWA	2.51489	2.13257	12.3652	8.43655	31.77	15.2	0.682
776928	RS4-11	2.78287	2.73245	16.1653	15.3706	4.92	1.81	0.951
776928	OE33	3.24122	2.98417	25.5649	19.77	22.67	7.93	0.773
776928	A4-Fuk	2.05358	2.30143	7.79574	9.98849	28.13	12.07	1.281
776928	CAS-1	3.3684	2.59138	29.0319	13.3482	54.02	23.07	0.46
776928	22RV1	3.16592	2.76323	23.7106	15.851	33.15	12.72	0.669
776928	L-363	2.94082	2.79577	18.9313	16.3752	13.5	4.93	0.865
776928	Hep3B2-1-7	2.93604	2.52844	18.8411	12.5339	33.48	13.88	0.665
776928	SUP-B15	2.92561	2.63267	18.6456	13.9109	25.39	10.01	0.746
776928	CAL-29	3.06082	2.87175	21.345	17.6679	17.23	6.18	0.828
776928	HCC-78	2.74858	2.96222	15.6205	19.3409	23.82	7.77	1.238
776928	KMRC-20	3.22513	2.63139	25.1568	13.8931	44.77	18.41	0.552
776928	WM793B	2.88358	2.90677	17.8781	18.2976	2.35	0.8	1.023
776928	GA-10	2.61933	2.46281	13.7266	11.7378	14.49	5.98	0.855
776928	JURL-MK1	2.36693	2.79133	10.6646	16.3026	52.87	17.93	1.529
776928	KOPN-8	2.95323	2.47432	19.1678	11.8737	38.05	16.22	0.619
776928	SNU-C5	3.20444	3.0514	24.6418	21.145	14.19	4.78	0.858
5-azacytidine	NCI-H1048	2.71933	2.23422	15.1702	9.33918	38.44	17.84	0.616
5-azacytidine	NCI-H209	2.75074	1.31992	15.6543	3.74314	76.09	52.02	0.239
5-azacytidine	NCI-H446	1.47544	1.29666	4.37297	3.65707	16.37	12.12	0.836
5-azacytidine	NCI-H929	1.3327	1.49237	3.79126	4.44761	17.31	11.98	1.173
5-azacytidine	SK-N-AS	2.73535	2.27366	15.4151	9.71485	36.98	16.88	0.63
5-azacytidine	UM-UC-3	1.32848	2.20679	3.77531	9.08647	140.68	66.11	2.407
5-azacytidine	HCC1187	1.55527	2.04292	4.73636	7.71307	62.85	31.35	1.628
5-azacytidine	CAL-33	2.12947	2.44665	8.41042	11.5496	37.33	14.89	1.373
5-azacytidine	EBC-1	2.7072	2.20698	14.9872	9.08818	39.36	18.48	0.606
5-azacytidine	EC-GI-10	1.85928	2.07262	6.41912	7.94559	23.78	11.47	1.238
5-azacytidine	LXF-289	2.36662	2.23357	10.6613	9.3331	12.46	5.62	0.875
5-azacytidine	HCT-15	2.09723	1.7166	8.14357	5.56558	31.66	18.15	0.683
5-azacytidine	SK-MEL-2	2.66298	2.6676	14.339	14.4053	0.46	0.17	1.005
5-azacytidine	Hs-578-T	2.3243	1.63216	10.2195	5.11491	49.95	29.78	0.501
5-azacytidine	SW620	2.06274	2.63089	7.86747	13.8861	76.5	27.54	1.765
5-azacytidine	BHT-101	1.64143	2.27483	5.16253	9.72623	88.4	38.59	1.884
5-azacytidine	A2058	1.95644	2.30978	7.0741	10.0723	42.38	18.06	1.424
5-azacytidine	COLO-679	2.84976	2.48127	17.2836	11.9564	30.82	12.93	0.692
5-azacytidine	CHP-212	2.31835	1.74212	10.1589	5.70943	43.8	24.86	0.562
5-azacytidine	DB	0.718105	2.18385	2.05054	8.88042	333.08	204.11	4.331
5-azacytidine	DU-4475	0.20694	1.64422	1.22991	5.17697	320.92	694.54	4.209
5-azacytidine	EM-2	0.750138	1.68867	2.11729	5.4123	155.62	125.12	2.556
5-azacytidine	FTC-133	2.64357	2.20124	14.0633	9.03625	35.75	16.73	0.643
5-azacytidine	GI-1	1.64547	2.20735	5.18345	9.09156	75.4	34.15	1.754
5-azacytidine	HT-144	2.18087	2.59905	8.85401	13.4509	51.92	19.17	1.519
5-azacytidine	KARPAS-422	2.51056	2.43526	12.3118	11.4188	7.25	3	0.927
5-azacytidine	MEG-01	0.943518	2.05363	2.569	7.79614	203.47	117.66	3.035
5-azacytidine	MES-SA	1.83837	2.23339	6.28631	9.33148	48.44	21.49	1.484
5-azacytidine	NCI-H524	0.587458	1.98936	1.79941	7.31087	306.29	238.64	4.063
5-azacytidine	Raji	2.6519	1.46926	14.1809	4.34603	69.35	44.6	0.306
5-azacytidine	RKO	1.6206	2.08401	5.0561	8.03661	58.95	28.6	1.589
5-azacytidine	SH-4	2.32076	2.0908	10.1834	8.0914	20.54	9.91	0.795
5-azacytidine	SK-MES-1	1.86557	2.46257	6.4596	11.7349	81.67	32	1.817
5-azacytidine	SNG-M	1.93435	2.03592	6.91956	7.6593	10.69	5.25	1.107
5-azacytidine	SW1463	2.87386	2.10338	17.7052	8.19383	53.72	26.81	0.463
5-azacytidine	SW948	1.96096	2.44984	7.10616	11.5865	63.05	24.93	1.63
5-azacytidine	OAW-42	2.86476	2.26904	17.5448	9.67007	44.88	20.79	0.551
5-azacytidine	SCC-15	2.81436	2.18704	16.6825	8.90877	46.6	22.29	0.534
5-azacytidine	CAL-54	2.68771	1.63253	14.6979	5.11681	65.19	39.26	0.348
5-azacytidine	NCI-H1975	2.35546	1.96327	10.5429	7.12258	32.44	16.65	0.676
5-azacytidine	NCI-H810	2.08707	1.98875	8.06129	7.30637	9.36	4.71	0.906
5-azacytidine	Jurkat	1.87173	1.5699	6.49952	4.80615	26.05	16.13	0.739
5-azacytidine	LS-180	2.37879	2.33419	10.7919	10.3211	4.36	1.87	0.956
5-azacytidine	CCK-81	1.84971	1.66226	6.35798	5.27121	17.09	10.13	0.829
5-azacytidine	ES-2	2.48099	2.54153	11.9531	12.699	6.24	2.44	1.062
5-azacytidine	HCC-44	1.79515	2.50893	6.02035	12.2917	104.17	39.76	2.042
5-azacytidine	TOV-21G	1.90951	1.72874	6.74977	5.63353	16.54	9.47	0.835
5-azacytidine	OCI-AML3	1.32799	1.47228	3.77344	4.35917	15.52	10.87	1.155
5-azacytidine	DND-41	1.75995	2.23434	5.81212	9.34033	60.7	26.96	1.607
5-azacytidine	huH-1	2.37657	2.30571	10.7679	10.0313	6.84	2.98	0.932
5-azacytidine	KOPN-8	0.668152	1.58212	1.95063	4.86528	149.42	136.79	2.494
5-azacytidine	SU-DHL-8	0.519972	1.59968	1.68198	4.95147	194.38	207.65	2.944
5-Fluorouracil	NCI-H526	2.19923	2.27426	9.01805	9.7207	7.79	3.41	1.078
5-Fluorouracil	NCI-H82	3.35408	2.28921	28.6193	9.86711	65.52	31.75	0.345
5-Fluorouracil	HCT-116	2.71119	2.93071	15.0471	18.741	24.55	8.1	1.245
5-Fluorouracil	D-283MED	1.9538	2.09449	7.05547	8.12127	15.11	7.2	1.151
5-Fluorouracil	HGC-27	3.29298	2.64754	26.923	14.1193	47.56	19.6	0.524
5-Fluorouracil	IPC-298	2.53412	2.79911	12.6053	16.4301	30.34	10.46	1.303
5-Fluorouracil	KYSE-150	3.25626	2.69358	25.9523	14.7845	43.03	17.28	0.57
5-Fluorouracil	L-540	-0.120625	2.34545	0.886366	10.438	1077.62	2044.42	11.776
5-Fluorouracil	NALM-6	2.339	2.49892	10.3709	12.1693	17.34	6.84	1.173
5-Fluorouracil	NAMALWA	3.01607	2.16608	20.411	8.72404	57.26	28.18	0.427
5-Fluorouracil	NCI-H838	2.32365	2.51695	10.2128	12.3907	21.33	8.32	1.213
5-Fluorouracil	CAL-27	1.95686	2.38549	7.07706	10.8644	53.52	21.9	1.535
5-Fluorouracil	23132-87	1.80734	2.66342	6.09422	14.3453	135.39	47.37	2.354
5-Fluorouracil	PANC-03-27	3.27382	2.31033	26.412	10.0777	61.84	29.43	0.382
5-Fluorouracil	BICR22	3.161	2.41176	23.5941	11.1536	52.73	23.7	0.473
5-Fluorouracil	HARA	3.27276	2.59729	26.3841	13.4273	49.11	20.64	0.509
5-Fluorouracil	HCC-44	3.01051	3.1504	20.2977	23.3454	15.01	4.65	1.15
5-Fluorouracil	NCI-H196	2.99414	2.61042	19.9681	13.6047	31.87	12.82	0.681
5-Fluorouracil	NCI-H2023	2.30673	2.92458	10.0415	18.6264	85.49	26.78	1.855
5-Fluorouracil	NCI-H2110	2.91634	2.5992	18.4736	13.453	27.18	10.87	0.728
5-Fluorouracil	MOLM-13	-0.0008708	2.0875	0.99913	8.06472	707.17	239822	8.072
5-Fluorouracil	MOLP-8	2.53119	2.93775	12.5685	18.8733	50.16	16.06	1.502
5-Fluorouracil	NU-DUL-1	2.24594	2.10491	9.44933	8.20638	13.15	6.28	0.868
5-Fluorouracil	PL-21	3.14414	2.39565	23.1996	10.9753	52.69	23.81	0.473
5-Fluorouracil	RCH-ACV	1.8827	1.84334	6.57122	6.3176	3.86	2.09	0.961
5-Fluorouracil	SU-DHL-10	3.07072	2.15691	21.5574	8.64437	59.9	29.76	0.401
5-Fluorouracil	SU-DHL-5	2.23209	1.78039	9.31929	5.93218	36.35	20.24	0.637
5-Fluorouracil	SU-DHL-6	3.20586	2.20032	24.6766	9.02794	63.42	31.37	0.366
5-Fluorouracil	SNU-175	2.90511	2.47103	18.2672	11.8347	35.21	14.94	0.648
5-Fluorouracil	SNU-C5	3.12046	2.72653	22.6568	15.2798	32.56	12.62	0.674
Acetalax	A673	2.84969	1.53846	17.2824	4.65744	73.05	46.01	0.269
Acetalax	HCC2157	-0.533916	-1.01965	0.586304	0.360722	38.48	90.98	0.615
Acetalax	HSC-2	3.20025	0.295912	24.5387	1.34435	94.52	90.75	0.055
Acetalax	KNS-62	1.31894	1.17299	3.73946	3.23163	13.58	11.07	0.864
Acetalax	TE-1	2.33618	1.06116	10.3416	2.88973	72.06	54.58	0.279
Acetalax	NCI-H522	3.28252	2.59501	26.6427	13.3967	49.72	20.94	0.503
Acetalax	MCF7	1.21503	1.99433	3.37039	7.34728	118	64.14	2.18
Acetalax	OVCAR-4	-0.41049	1.74672	0.663325	5.73578	764.7	525.52	8.647
Acetalax	ABC-1	-1.32515	-0.213027	0.265763	0.808134	204.08	83.92	3.041
Acetalax	BT-20	0.702262	2.18869	2.01831	8.92353	342.13	211.66	4.421
Acetalax	EFO-27	3.31182	1.51857	27.4351	4.56568	83.36	54.15	0.166
Acetalax	HCC1419	1.632	0.225215	5.1141	1.25259	75.51	86.2	0.245
Acetalax	HCC70	0.246011	-0.301535	1.27891	0.739682	42.16	222.57	0.578
Acetalax	HSC-4	1.10313	1.55265	3.01358	4.72399	56.76	40.75	1.568
Acetalax	HuP-T3	2.1907	1.54146	8.94147	4.6714	47.76	29.64	0.522
Acetalax	HT-115	-0.204547	0.565356	0.815016	1.76007	115.96	376.39	2.16
Acetalax	KYSE-180	3.24592	2.77565	25.6853	16.0491	37.52	14.49	0.625
Acetalax	LS-123	-0.997949	2.75516	0.368635	15.7235	4165.35	376.08	42.653
Acetalax	NCI-H747	1.92643	2.03477	6.86496	7.65051	11.44	5.62	1.114
Acetalax	RT-112	1.76424	1.84139	5.83716	6.30529	8.02	4.37	1.08
Acetalax	SCC-9	-0.355938	1.88465	0.700516	6.58402	839.88	629.49	9.399
Acetalax	T84	2.33702	1.35159	10.421	3.86358	62.93	42.17	0.371
Acetalax	OE19	-0.517552	1.55422	0.595978	4.7314	693.89	400.3	7.939
Acetalax	SCC-4	1.97883	0.675568	7.2343	1.96515	72.84	65.86	0.272
Acetalax	23132-87	0.647716	1.53926	1.91117	4.66114	143.89	137.64	2.439
Acetalax	22RV1	0.434804	-0.800349	1.54466	0.449172	70.92	284.07	0.291
Acetalax	MDA-MB-157	2.85381	1.99136	17.3538	7.32552	57.79	30.22	0.422
Acetalax	RL95-2	1.81493	1.02512	6.14065	2.78744	54.61	43.52	0.454
Acetalax	CAMA-1	2.10389	0.884341	8.19797	2.42139	70.46	57.97	0.295
Acetalax	CCK-81	2.94656	2.18168	19.0404	8.86122	53.46	25.96	0.465
Acetalax	KYM-1	-0.761311	1.33982	0.617337	3.81836	518.52	275.99	6.185
Acetalax	SU8686	2.76095	2.85859	15.8149	17.4369	10.26	3.54	1.103
Acetalax	EFM-192A	1.95598	1.88965	7.07088	6.61707	6.42	3.39	0.936
Acetalax	OE21	0.833017	2.06102	2.30025	7.85395	241.44	147.42	3.414
Acetalax	PA-TU-8902	2.43167	2.97219	11.3779	19.5347	71.69	22.23	1.717
Acetalax	TOV-112D	2.42316	1.54964	13.4921	4.70976	65.09	36.05	0.349
Acetalax	VCaP	0.67764	0.695694	2.4627	2.0051	18.58	2.66	0.814
Acetalax	OVK-18	2.37272	1.6413	10.7266	5.1619	51.88	30.83	0.481
Acetalax	SNU-175	1.75677	1.38861	5.79369	4.00929	30.8	20.96	0.692
Acetalax	SNU-81	2.69853	1.10283	14.8578	3.01268	79.72	59.13	0.203
Afatinib	SK-ES-1	1.13639	0.779622	3.11551	2.18065	30.01	31.4	0.7
Afatinib	NCI-H661	1.59729	2.22038	4.93962	9.21087	86.47	39.01	1.865
Afatinib	DMS-273	1.28558	-0.898818	3.61677	0.40705	88.75	169.92	0.113
Afatinib	NCI-H1963	1.40673	1.0922	4.08257	2.98084	26.99	22.36	0.73
Afatinib	SBC-5	1.77928	1.08338	5.92561	2.95466	50.14	39.11	0.499
Afatinib	SK-N-SH	1.5329	1.22125	4.63157	3.39143	26.78	20.33	0.732
Afatinib	NCI-H2122	0.457159	1.10608	1.57958	3.02248	91.35	141.95	1.913
Afatinib	SHP-77	1.19667	1.91705	3.30907	6.80084	105.52	60.2	2.055
Afatinib	HCC1187	2.11452	1.03233	8.28562	2.80761	66.11	51.18	0.339
Afatinib	CAL-12T	1.05217	1.68107	2.86385	5.3713	87.55	59.77	1.876
Afatinib	CAL-33	1.05425	1.66585	2.86982	5.29015	84.34	58.01	1.843
Afatinib	HSC-2	-0.465977	1.09091	0.627522	2.97699	374.4	334.11	4.744
Afatinib	HL-60	1.51857	1.65272	4.56568	5.22114	14.36	8.83	1.144
Afatinib	SK-OV-3	1.50334	1.69304	4.49669	5.43598	20.89	12.62	1.209
Afatinib	SW620	2.07825	1.85431	7.99047	6.38732	20.06	10.78	0.799
Afatinib	A253	1.41396	2.01398	4.11222	7.49305	82.21	42.43	1.822
Afatinib	647-V	1.50028	1.61454	4.48294	5.0256	12.1	7.62	1.121
Afatinib	697	0.312853	0.47376	1.36732	1.60602	17.46	51.43	1.175
Afatinib	CHP-212	1.38515	1.16869	3.99541	3.21776	19.46	15.63	0.805
Afatinib	Daoy	1.77665	1.47975	5.91	4.39184	25.69	16.71	0.743
Afatinib	Detroit562	0.361668	-0.180336	1.43572	0.83499	41.84	149.86	0.582
Afatinib	DK-MG	1.81427	0.554199	6.13662	1.74055	71.64	69.45	0.284
Afatinib	EFO-27	0.881194	0.679196	2.41378	1.97229	18.29	22.92	0.817
Afatinib	ESS-1	1.96897	1.02153	7.16327	2.77745	61.23	48.12	0.388
Afatinib	H4	1.32933	1.44478	3.7785	4.2409	12.24	8.68	1.122
Afatinib	HSC-4	2.12574	1.73829	8.37906	5.68759	32.12	18.23	0.679
Afatinib	KG-1	1.66246	1.06171	5.27229	2.89131	45.16	36.14	0.548
Afatinib	HT-115	0.226903	1.01333	1.25471	2.75476	119.55	346.59	2.196
Afatinib	LoVo	1.13076	0.632884	3.098	1.88303	39.22	44.03	0.608
Afatinib	LS-123	1.42738	0.914132	4.16778	2.49461	40.15	35.96	0.599
Afatinib	LS-411N	1.61979	1.22803	5.05205	3.4145	32.41	24.19	0.676
Afatinib	MEG-01	1.15864	1.04193	3.1856	2.83468	11.02	10.07	0.89
Afatinib	MHH-CALL-2	1.47768	0.587779	4.38275	1.79999	58.93	60.22	0.411
Afatinib	NCI-N87	-5.75717	1.1461	0.00316004	3.14591	99452.8	119.91	995.528
Afatinib	OPM-2	1.77814	-0.96771	5.91887	0.379952	93.58	154.42	0.064
Afatinib	PF-382	0.81469	0.557786	2.25848	1.7468	22.66	31.53	0.773
Afatinib	Raji	1.37071	1.491	3.93815	4.44154	12.78	8.78	1.128
Afatinib	RKO	1.63306	1.9754	5.11951	7.20947	40.82	20.96	1.408
Afatinib	SKM-1	0.992604	1.56727	2.69825	4.79353	77.65	57.89	1.777
Afatinib	SNU-449	1.97704	1.34079	7.22134	3.82205	47.07	32.18	0.529
Afatinib	THP-1	0.641912	1.44706	1.90011	4.25061	123.7	125.43	2.237
Afatinib	ZR-75-30	-1.75956	1.44158	0.172121	4.22736	2356.05	181.93	24.56
Afatinib	KM-H2	1.52364	1.22487	4.58891	3.40372	25.83	19.61	0.742
Afatinib	NCI-H838	1.48071	1.08564	4.39607	2.96135	32.64	26.68	0.674
Afatinib	OAW-42	2.28761	0.39275	9.85133	1.48105	84.97	82.83	0.15
Afatinib	BV-173	0.576125	0.75305	1.77913	2.12347	19.35	30.71	1.194
Afatinib	RPMI-7951	1.76259	1.0285	5.82752	2.79687	52.01	41.65	0.48
Afatinib	UACC-812	1.02228	1.76206	2.77952	5.82443	109.55	72.37	2.095
Afatinib	BFTC-905	1.22481	1.05403	3.40351	2.86918	15.7	13.94	0.843
Afatinib	A3-KAW	0.505442	0.908324	1.65772	2.48016	49.61	79.71	1.496
Afatinib	OCI-AML2	1.11986	1.33348	3.06442	3.79424	23.82	19.08	1.238
Afatinib	8505C	1.93297	1.72116	6.91002	5.59102	19.09	10.96	0.809
Afatinib	HDLM-2	1.26001	1.05422	3.52544	2.86974	18.6	16.33	0.814
Afatinib	NCI-H1975	-1.13237	0.460188	0.322267	1.58437	391.63	140.64	4.916
Afatinib	TE-11	0.60721	0.017446	1.8353	1.0176	44.55	97.13	0.554
Afatinib	KYM-1	1.49354	0.550438	4.45285	1.73401	61.06	63.15	0.389
Afatinib	NCI-H647	2.11764	0.915946	8.31148	2.49914	69.93	56.75	0.301
Afatinib	NCI-H841	1.83148	1.0667	6.24312	2.90578	53.46	41.76	0.465
Afatinib	SNU-398	1.25644	1.28797	3.51291	3.62542	3.2	2.51	1.032
Afatinib	OCI-AML3	0.734725	1.09947	2.08491	3.00258	44.01	49.64	1.44
Afatinib	HCC-78	1.13172	1.87831	3.10099	6.54243	110.98	65.97	2.11
Afatinib	HDQ-P1	0.401188	0.849366	1.4936	2.33816	56.55	111.71	1.565
Afatinib	PANC-02-03	1.53604	1.79045	4.64616	5.99217	28.97	16.56	1.29
Afatinib	HCC1500	1.23203	0.516916	3.42817	1.67685	51.09	58.04	0.489
Afatinib	KCL-22	1.27903	0.641203	3.59317	1.89876	47.16	49.87	0.528
Afatinib	L-1236	0.539397	1.04568	1.71497	2.84535	65.91	93.86	1.659
Afatinib	MOLM-16	-0.063786	1.25412	0.938206	3.50474	273.56	2066.13	3.736
Afatinib	OCI-AML5	1.05191	1.04283	2.86311	2.83722	0.9	0.86	0.991
Afatinib	PL-21	1.19813	1.2792	3.31391	3.59378	8.45	6.77	1.084
Afatinib	SU-DHL-10	0.624869	0.758649	1.868	2.13539	14.31	21.41	1.143
Afatinib	JHOS-2	0.761278	1.76508	2.14101	5.84204	172.86	131.86	2.729
Afatinib	SNU-1040	0.641255	0.517145	1.89886	1.67723	11.67	19.35	0.883
Afatinib	SNU-407	1.68603	0.998131	5.39801	2.71321	49.74	40.8	0.503
Afatinib	SNU-61	2.14221	1.84416	8.5182	6.32281	25.77	13.91	0.742
Afuresertib	8-MG-BA	0.937156	1.35344	2.55271	3.87071	51.63	44.42	1.516
Afuresertib	COR-L23	1.32321	1.65398	3.75545	5.22774	39.2	25	1.392
Afuresertib	SK-N-SH	1.7681	1.69261	5.85971	5.43365	7.27	4.27	0.927
Afuresertib	NCI-H929	-2.57539	-2.36027	0.0761244	0.0943949	24	8.35	1.24
Afuresertib	HCC1395	0.712868	1.35585	2.03983	3.88007	90.22	90.2	1.902
Afuresertib	EBC-1	2.2848	1.40978	9.82368	4.09506	58.31	38.3	0.417
Afuresertib	HCT-116	2.151	1.53975	8.59347	4.6634	45.73	28.42	0.543
Afuresertib	IGROV-1	-1.56712	0.001298	0.208645	1.0013	379.91	100.08	4.799
Afuresertib	A2058	1.46746	1.62569	4.33821	5.0819	17.14	10.78	1.171
Afuresertib	FTC-133	0.911172	1.74796	2.48724	5.7429	130.89	91.84	2.309
Afuresertib	GAMG	2.04068	1.78018	7.69582	5.9309	22.93	12.77	0.771
Afuresertib	HOS	1.81293	1.68416	6.12835	5.3879	12.08	7.1	0.879
Afuresertib	HSC-3	1.25372	1.43275	3.50336	4.19019	19.61	14.28	1.196
Afuresertib	HT-144	2.11381	1.93609	8.27976	6.9316	16.28	8.41	0.837
Afuresertib	KMS-12-BM	1.12628	1.04447	3.08416	2.8419	7.86	7.26	0.921
Afuresertib	KU812	1.73629	0.466691	5.67625	1.59471	71.91	73.12	0.281
Afuresertib	MHH-CALL-2	2.08513	0.613454	8.04561	1.8468	77.05	70.58	0.23
Afuresertib	RS4-11	1.54801	1.23324	4.70211	3.43232	27	20.33	0.73
Afuresertib	SNU-387	1.84474	1.17481	6.32642	3.23753	48.83	36.32	0.512
Afuresertib	SUP-T1	0.853364	1.13002	2.34753	3.09571	31.87	32.42	1.319
Afuresertib	T84	1.76059	1.17671	5.81586	3.24367	44.23	33.16	0.558
Afuresertib	CW-2	2.17986	1.28592	8.84508	3.61798	59.1	41.01	0.409
Afuresertib	COLO-668	1.89267	1.67055	6.63704	5.31508	19.92	11.74	0.801
Afuresertib	ST486	2.26143	0.89395	9.59676	2.44477	74.53	60.47	0.255
Afuresertib	23132-87	0.889532	1.13178	2.43399	3.10117	27.41	27.23	1.274
Afuresertib	CAL-54	0.253395	0.738003	1.28839	2.09175	62.35	191.25	1.624
Afuresertib	NCI-H1975	1.05042	0.952364	2.85885	2.59183	9.34	9.33	0.907
Afuresertib	BT-474	2.05086	1.25093	7.77458	3.4936	55.06	39	0.449
Afuresertib	CCK-81	2.21762	-0.781623	9.18543	0.457663	95.02	135.25	0.05
Afuresertib	EN	0.59918	1.62388	1.82063	5.07274	178.63	171.02	2.786
Afuresertib	Hep3B2-1-7	0.280524	1.36388	1.32382	3.91132	195.46	386.19	2.955
Afuresertib	OCI-AML3	1.313	0.780827	3.71732	2.18328	41.27	40.53	0.587
Afuresertib	AMO-1	0.795538	-0.0399994	2.21563	0.96079	56.64	105.03	0.434
Afuresertib	KMRC-1	1.98323	1.02345	7.26614	2.78277	61.7	48.39	0.383
Afuresertib	NCI-H1781	1.54155	1.00827	4.67184	2.74087	41.33	34.59	0.587
Afuresertib	NB4	1.6939	0.539406	5.44065	1.71499	68.48	68.16	0.315
Afuresertib	JEKO-1	0.991733	0.341045	2.6959	1.40642	47.83	65.61	0.522
Afuresertib	KOPN-8	2.08851	1.34169	8.07286	3.82549	52.61	35.76	0.474
Afuresertib	MOLM-13	1.04969	-0.249024	2.85677	0.779561	72.71	123.72	0.273
Afuresertib	MOLM-16	0.930605	-0.098179	2.53604	0.906487	64.26	110.55	0.357
Afuresertib	WSU-DLCL2	-2.77983	-2.77423	0.0620493	0.0623978	0.56	0.2	1.006
Afuresertib	TE-4	1.99814	1.33337	7.37534	3.79383	48.56	33.27	0.514
AGI-6780	DOHH-2	2.15405	1.58098	8.61973	4.8597	43.62	26.6	0.564
AGI-6780	SNU-398	1.77908	1.92425	5.92438	6.85002	15.62	8.16	1.156
AGI-6780	KCL-22	2.25251	1.90461	9.51158	6.7168	29.38	15.44	0.706
AGI-6780	SU-DHL-6	2.0047	1.81101	7.42384	6.11661	17.61	9.66	0.824
AGK2	Detroit562	0.999052	0.885344	2.71571	2.42382	10.75	11.38	0.893
AGK2	KCL-22	1.29234	1.19816	3.6413	3.31401	8.99	7.29	0.91
Alisertib	NCI-H1650	2.17545	1.69854	8.80611	5.46594	37.93	21.92	0.621
Alisertib	NCI-H2170	0.371933	0.578248	1.45054	1.78291	22.91	55.47	1.229
Alisertib	COR-L311	0.449684	-1.36262	1.56782	0.25599	83.67	403.02	0.163
Alisertib	NCI-H1048	-0.725268	0.285461	0.484195	1.33038	174.76	139.36	2.748
Alisertib	NCI-H1092	1.75815	1.25212	5.80171	3.49775	39.71	28.78	0.603
Alisertib	NCI-H209	1.44892	-0.523829	4.2585	0.592248	86.09	136.15	0.139
Alisertib	NCI-H2227	-0.429301	-0.583027	0.650964	0.558206	14.25	35.81	0.858
Alisertib	CAL-12T	2.30074	1.02855	9.98157	2.79701	71.98	55.29	0.28
Alisertib	CAL-33	-1.41429	1.22756	0.243099	3.41289	1303.91	186.8	14.039
Alisertib	TE-8	1.69896	0.757449	5.46827	2.13283	61	55.42	0.39
Alisertib	NCI-H23	1.5321	1.23338	4.62787	3.4328	25.82	19.5	0.742
Alisertib	A549	0.653205	1.11289	1.92169	3.04313	58.36	70.37	1.584
Alisertib	ACHN	1.75865	0.31015	5.80459	1.36363	76.51	82.36	0.235
Alisertib	CAKI-1	1.29394	0.460112	3.64711	1.58425	56.56	64.44	0.434
Alisertib	SF268	1.22371	1.59639	3.39977	4.93518	45.16	30.46	1.452
Alisertib	OVCAR-8	1.22002	1.10536	3.38725	3.02031	10.83	9.4	0.892
Alisertib	AGS	1.07013	-0.014384	2.91575	0.985719	66.19	101.34	0.338
Alisertib	A253	2.21273	1.14196	9.1406	3.13291	65.73	48.39	0.343
Alisertib	DB	1.77168	0.734633	5.8807	2.08472	64.55	58.53	0.355
Alisertib	ECC10	-0.828702	1.04841	0.436616	2.85312	553.46	226.51	6.535
Alisertib	ESS-1	0.888071	0.999727	2.43044	2.71754	11.81	12.57	1.118
Alisertib	HGC-27	-1.6742	1.50981	0.187458	4.52589	2314.35	190.18	24.143
Alisertib	KMS-12-BM	1.83208	-2.9063	6.24687	0.0546776	99.12	258.63	0.009
Alisertib	HT-115	0.115857	0.681311	1.12284	1.97647	76.02	488.06	1.76
Alisertib	LAMA-84	-1.11757	-1.86598	0.327074	0.154744	52.69	66.97	0.473
Alisertib	MHH-CALL-2	-0.335918	-1.78478	0.714682	0.167834	76.52	431.31	0.235
Alisertib	MONO-MAC-6	1.40263	-1.83007	4.06589	0.160403	96.05	230.47	0.039
Alisertib	NUGC-3	1.66629	0.923517	5.29252	2.51813	52.42	44.58	0.476
Alisertib	NCI-H1155	-0.550709	0.66246	0.576541	1.93956	236.41	220.29	3.364
Alisertib	NCI-H524	-2.13161	-2.71827	0.118647	0.0659889	44.38	27.52	0.556
Alisertib	OPM-2	-0.404305	-1.66967	0.667441	0.188308	71.79	312.97	0.282
Alisertib	PF-382	-0.814017	-0.332454	0.443075	0.717162	61.86	59.16	1.619
Alisertib	RT-112	0.353964	1.28938	1.4247	3.63053	154.83	264.27	2.548
Alisertib	SF126	0.95996	1.15596	2.61159	3.17706	21.65	20.42	1.217
Alisertib	SUP-T1	-1.7697	-0.087004	0.170385	0.916673	438	95.08	5.38
Alisertib	SW1116	2.26767	2.2713	9.65684	9.69199	0.36	0.16	1.004
Alisertib	SW48	-2.99433	-0.960127	0.0500701	0.382844	664.62	67.94	7.646
Alisertib	CHP-126	-2.28284	-0.949175	0.101994	0.38706	279.49	58.42	3.795
Alisertib	SCC-4	1.49412	1.07185	4.45543	2.92079	34.44	28.26	0.656
Alisertib	CAL-27	-1.89636	0.26651	0.150114	1.3054	769.61	114.05	8.696
Alisertib	CAL-54	1.84793	1.01317	6.34666	2.75433	56.6	45.17	0.434
Alisertib	TE-11	-2.886	-1.70003	0.0557987	0.182677	227.39	41.09	3.274
Alisertib	LCLC-97TM1	0.537305	0.671104	1.71139	1.9564	14.32	24.9	1.143
Alisertib	FU-OV-1	1.69903	1.69188	5.46862	5.42968	0.71	0.42	0.993
Alisertib	NCI-H1915	1.7622	0.803702	5.82522	2.2338	61.65	54.39	0.383
Alisertib	NCI-H647	0.535534	0.412554	1.70836	1.51067	11.57	22.96	0.884
Alisertib	HDQ-P1	2.25198	0.721866	9.50658	2.05827	78.35	67.95	0.217
Alisertib	LOU-NH91	1.70352	1.05475	5.49324	2.87126	47.73	38.08	0.523
Alisertib	NCI-H2110	1.01837	1.48158	2.76868	4.39991	58.92	45.49	1.589
Alisertib	GA-10	-2.11883	-2.36415	0.120172	0.0940289	21.75	11.58	0.782
Alisertib	MOLP-8	1.35086	-2.46456	3.86073	0.0850459	97.8	282.44	0.022
Alisertib	NCI-H1341	0.01365	0.174962	1.01374	1.1912	17.51	1181.77	1.175
Alisertib	NCI-H1876	-1.43891	-0.858444	0.237187	0.423821	78.69	40.34	1.787
Alisertib	JHOS-2	1.15772	1.61941	3.18267	5.05011	58.68	39.88	1.587
Alisertib	SNU-C5	1.92417	0.592566	6.84945	1.80862	73.59	69.2	0.264
Alpelisib	NCI-H929	-1.01643	0.921678	0.361883	2.5135	594.56	190.68	6.946
Alpelisib	EPLC-272H	1.73354	1.1058	5.66064	3.02164	46.62	36.21	0.534
Alpelisib	HCT-15	2.00642	1.70237	7.43668	5.48695	26.22	15.15	0.738
Alpelisib	IGROV-1	-0.682052	1.4144	0.505578	4.114	713.72	307.37	8.137
Alpelisib	CHP-212	1.66796	1.29527	5.30133	3.65197	31.11	22.34	0.689
Alpelisib	GDM-1	0.526079	0.903148	1.69228	2.46736	45.8	71.68	1.458
Alpelisib	MKN1	1.55835	1.02522	4.75097	2.78772	41.32	34.21	0.587
Alpelisib	RS4-11	2.1559	1.42261	8.63569	4.14792	51.97	34.01	0.48
Alpelisib	BFTC-909	1.79572	1.36965	6.02382	3.93396	34.69	23.73	0.653
Alpelisib	HARA	2.16548	1.54045	8.71876	4.66671	46.48	28.86	0.535
Alpelisib	CAL-29	0.659039	1.53545	1.93293	4.64343	140.23	132.98	2.402
Alpelisib	EFM-192A	2.25458	1.51503	9.53126	4.54953	52.27	32.8	0.477
Alpelisib	NB4	0.535742	1.47506	1.70872	4.37129	155.82	175.33	2.558
Alpelisib	MOLM-13	2.13887	0.03333	8.4898	1.03389	87.82	98.44	0.122
Alpelisib	MOLP-8	0.804747	1.27524	2.23613	3.57956	60.08	58.46	1.601
Alpelisib	OCI-LY-19	2.02322	1.60641	7.56265	4.98487	34.09	20.6	0.659
Alpelisib	SU-DHL-5	1.88551	0.956218	6.5897	2.60184	60.52	49.29	0.395
Alpelisib	SU-DHL-6	0.270221	0.940124	1.31025	2.5603	95.4	247.91	1.954
AMG-319	RPMI-8402	2.13618	1.45624	8.46706	4.28981	49.34	31.83	0.507
AMG-319	THP-1	2.00335	1.8061	7.41388	6.08664	17.9	9.85	0.821
ascorbate (vitamin C)	SU-DHL-8	7.13074	6.9355	1249.8	1028.13	17.74	2.74	0.823
ascorbate (vitamin C)	WSU-DLCL2	6.78647	6.64344	885.783	767.734	13.33	2.11	0.867
AT13148	HCC1954	2.15711	1.44642	8.64612	4.2479	50.87	32.95	0.491
AT13148	TE-10	1.8827	1.40967	6.57121	4.09459	37.69	25.13	0.623
AT13148	A549	1.94669	1.78272	7.00547	5.94601	15.12	8.42	0.849
AT13148	GI-1	1.85612	1.38354	6.39887	3.98899	37.66	25.46	0.623
AT13148	GCT	0.825925	1.51569	2.28399	4.55256	99.32	83.51	1.993
AT13148	ESS-1	1.76859	1.45417	5.8626	4.28093	26.98	17.78	0.73
AT13148	LoVo	0.95965	1.17421	2.61078	3.23559	23.93	22.36	1.239
AT13148	MDA-MB-453	2.03431	1.50819	7.64701	4.51855	40.91	25.86	0.591
AT13148	P12-ICHIKAWA	0.974464	1.23809	2.64975	3.44903	30.16	27.05	1.302
AT13148	P31-FUJ	-0.553594	1.24034	0.57488	3.45678	501.3	324.05	6.013
AT13148	REH	2.1615	1.36668	8.68413	3.92231	54.83	36.77	0.452
AT13148	BFTC-909	1.45337	1.63649	4.27748	5.1371	20.1	12.6	1.201
AT13148	AU565	0.740952	1.34964	2.09793	3.85602	83.8	82.15	1.838
AT13148	NCI-H810	2.1837	1.25648	8.8791	3.51303	60.43	42.46	0.396
AT13148	TE-11	1.31889	1.20048	3.73926	3.32171	11.17	8.98	0.888
AT13148	TOV-21G	1.59856	1.37032	4.9459	3.93659	20.41	14.28	0.796
AT13148	OCI-AML3	1.96387	1.45635	7.12683	4.29029	39.8	25.84	0.602
AT13148	NCI-H1781	1.92081	1.64537	6.82647	5.18295	24.08	14.34	0.759
AT13148	NB4	2.24974	0.83157	9.48526	2.29692	75.78	63.04	0.242
AT13148	RCH-ACV	1.20455	0.973156	3.33526	2.64628	20.66	19.21	0.793
AT13148	SU-DHL-6	1.18359	0.868986	3.26609	2.38449	26.99	26.58	0.73
AT13148	WSU-DLCL2	0.244186	0.965114	1.27658	2.62509	105.63	295.24	2.056
Axitinib	HCC1395	2.1741	1.75863	8.79427	5.80449	34	19.11	0.66
Axitinib	BEN	2.22256	1.7148	9.23095	5.55558	39.82	22.85	0.602
Axitinib	697	0.129092	0.864793	1.13779	2.37451	108.69	569.9	2.087
Axitinib	DK-MG	1.76549	1.97038	5.84444	7.17343	22.74	11.61	1.227
Axitinib	DOHH-2	0.31622	1.22504	1.37193	3.40432	148.14	287.4	2.481
Axitinib	DU-4475	1.08176	1.06617	2.94988	2.90424	1.55	1.44	0.985
Axitinib	ECC12	2.17539	1.5022	8.80559	4.49155	48.99	30.95	0.51
Axitinib	GI-1	1.97957	1.22768	7.23966	3.4133	52.85	37.98	0.471
Axitinib	JVM-3	0.3209	0.962347	1.37837	2.61783	89.92	199.89	1.899
Axitinib	KG-1	0.104522	1.71985	1.11018	5.58371	402.96	1545.45	5.03
Axitinib	KU812	-2.19514	0.44946	0.111343	1.56747	1307.78	120.48	14.078
Axitinib	L-540	1.93442	1.21129	6.92004	3.35782	51.48	37.38	0.485
Axitinib	LoVo	2.23597	1.3979	9.35552	4.04671	56.75	37.48	0.433
Axitinib	RPMI-8402	0.553349	0.641098	1.73907	1.89856	9.17	15.86	1.092
Axitinib	RT-112	0.874267	1.36859	2.39712	3.9298	63.94	56.54	1.639
Axitinib	THP-1	2.18866	1.50154	8.92321	4.4886	49.7	31.39	0.503
Axitinib	BV-173	-1.13708	0.759748	0.320754	2.13774	566.47	166.82	6.665
Axitinib	RL	1.85962	1.05034	6.42132	2.85863	55.48	43.52	0.445
Axitinib	CAS-1	2.08964	1.94904	8.08201	7.02193	13.12	6.73	0.869
Axitinib	OCI-AML2	1.4952	1.03806	4.46022	2.82373	36.69	30.57	0.633
Axitinib	JEKO-1	1.44069	1.04959	4.22363	2.85649	32.37	27.15	0.676
Axitinib	JM1	2.07867	0.974487	7.99381	2.64981	66.85	53.12	0.331
Axitinib	MOLP-8	1.61492	1.00619	5.02748	2.73515	45.6	37.69	0.544
Axitinib	PL-21	2.25639	1.53993	9.54854	4.66428	51.15	31.75	0.488
Axitinib	SU-DHL-6	1.64713	0.171016	5.19204	1.18651	77.15	89.62	0.229
Axitinib	SU-DHL-8	1.79805	0.922194	6.03786	2.5148	58.35	48.71	0.417
AZ6102	5637	2.26455	1.54566	9.62679	4.69105	51.27	31.75	0.487
AZ6102	DMS-273	2.10107	1.30018	8.17495	3.66995	55.11	38.12	0.449
AZ6102	NCI-H446	1.10711	1.20239	3.02561	3.32806	10	8.61	1.1
AZ6102	SBC-5	2.09206	1.62882	8.10157	5.09787	37.08	22.14	0.629
AZ6102	NCI-H2030	2.24493	1.41267	9.43972	4.10691	56.49	37.07	0.435
AZ6102	NCI-H2122	1.98936	1.54825	7.31086	4.70324	35.67	22.17	0.643
AZ6102	LU-65	2.04588	1.5666	7.73599	4.79035	38.08	23.43	0.619
AZ6102	Hs-578-T	2.05854	1.47136	7.83452	4.35517	44.41	28.52	0.556
AZ6102	A375	2.04973	1.74562	7.76581	5.72943	26.22	14.84	0.738
AZ6102	COLO-792	0.530712	1.77359	1.70014	5.89197	246.56	234.19	3.466
AZ6102	COLO-679	1.24116	1.79685	3.45961	6.03063	74.32	44.77	1.743
AZ6102	CFPAC-1	1.61637	1.91836	5.03476	6.80978	35.26	18.68	1.353
AZ6102	G-361	1.69778	1.81512	5.46178	6.14183	12.45	6.91	1.125
AZ6102	H4	0.5708	1.47322	1.76968	4.36325	146.56	158.1	2.466
AZ6102	HGC-27	1.4969	1.66297	4.46781	5.27497	18.07	11.09	1.181
AZ6102	IGR-1	1.71262	1.90277	5.54349	6.70441	20.94	11.1	1.209
AZ6102	JVM-3	1.28084	1.50099	3.59968	4.48612	24.63	17.19	1.246
AZ6102	KATOIII	2.25446	0.127584	9.53013	1.13608	88.08	94.34	0.119
AZ6102	KMS-12-BM	2.07645	1.5636	7.97608	4.77597	40.12	24.7	0.599
AZ6102	LoVo	2.04049	1.29949	7.69436	3.66741	52.34	36.31	0.477
AZ6102	MONO-MAC-6	1.09649	1.25507	2.99365	3.50807	17.18	14.46	1.172
AZ6102	NCI-H716	2.03449	-0.903442	7.64837	0.405173	94.7	144.41	0.053
AZ6102	Raji	1.7023	1.6039	5.48653	4.9724	9.37	5.78	0.906
AZ6102	RCM-1	1.59264	1.70293	4.91672	5.49002	11.66	6.92	1.117
AZ6102	RKO	2.00373	1.57356	7.41666	4.8238	34.96	21.47	0.65
AZ6102	SK-HEP-1	2.11563	1.64334	8.29477	5.17243	37.64	22.32	0.624
AZ6102	SK-MEL-30	1.68809	1.41464	5.40916	4.11501	23.93	16.2	0.761
AZ6102	SK-UT-1	2.1247	1.48641	8.37042	4.42117	47.18	30.04	0.528
AZ6102	SNU-423	2.26078	1.77045	9.59053	5.87347	38.76	21.69	0.612
AZ6102	SW948	1.7739	1.58213	5.89378	4.86533	17.45	10.81	0.826
AZ6102	CHP-126	2.20086	1.70111	9.03281	5.48004	39.33	22.71	0.607
AZ6102	CA46	1.70715	1.4568	5.51323	4.29221	22.15	14.66	0.779
AZ6102	AU565	1.8023	1.74334	6.06357	5.7164	5.73	3.27	0.943
AZ6102	A4-Fuk	1.9577	1.3746	7.08299	3.95349	44.18	29.78	0.558
AZ6102	COR-L279	2.07812	1.74879	7.98943	5.74762	28.06	15.85	0.719
AZ6102	CML-T1	1.14473	1.43425	3.1416	4.1965	33.58	25.29	1.336
AZ6102	CAL-54	1.07233	1.172	2.92217	3.22846	10.48	9.3	1.105
AZ6102	Caov-4	1.05318	1.58092	2.86675	4.85941	69.51	50.11	1.695
AZ6102	Jurkat	1.74539	1.47269	5.72816	4.36094	23.87	15.62	0.761
AZ6102	NCI-H211	2.26819	1.53788	9.66192	4.65469	51.82	32.2	0.482
AZ6102	NCI-H841	2.27176	1.6852	9.69642	5.39355	44.38	25.82	0.556
AZ6102	RERF-GC-1B	1.51629	1.5173	4.5553	4.5599	0.1	0.07	1.001
AZ6102	CAL-29	1.83672	1.54273	6.27592	4.67733	25.47	16.01	0.745
AZ6102	HDQ-P1	0.691238	1.48348	1.99619	4.40826	120.83	114.61	2.208
AZ6102	JEKO-1	1.94836	1.56243	7.01718	4.7704	32.02	19.81	0.68
AZ6102	KOPN-8	1.54876	1.42299	4.70564	4.1495	11.82	8.12	0.882
AZ6102	L-1236	2.08296	1.58552	8.02822	4.88184	39.19	23.88	0.608
AZ6102	RCH-ACV	2.0524	1.31894	7.78653	3.73947	51.98	35.74	0.48
AZ6102	SU-DHL-4	1.45533	1.67724	4.28591	5.35076	24.85	15.25	1.248
AZ6102	SU-DHL-8	1.82083	1.26665	6.17696	3.54895	42.55	30.44	0.575
AZ6102	WSU-DLCL2	1.4484	1.37817	4.25628	3.96763	6.78	4.85	0.932
AZ6102	MM1S	1.92225	1.50788	6.83635	4.51713	33.92	21.56	0.661
AZ960	42-MG-BA	1.06862	1.64391	2.91135	5.17537	77.77	53.84	1.778
AZ960	YKG-1	1.20363	1.01123	3.3322	2.74897	17.5	15.99	0.825
AZ960	COR-L311	1.6803	0.796016	5.36714	2.21669	58.7	52.63	0.413
AZ960	NCI-H209	1.43363	1.09223	4.19389	2.98093	28.92	23.81	0.711
AZ960	NCI-H2227	1.07071	1.0246	2.91746	2.78597	4.51	4.31	0.955
AZ960	NCI-H446	0.172718	-0.415624	1.18853	0.659928	44.48	340.64	0.555
AZ960	SK-N-DZ	1.08175	0.354828	2.94985	1.42594	51.66	67.2	0.483
AZ960	Calu-6	1.92213	0.832626	6.8355	2.29935	66.36	56.68	0.336
AZ960	LCLC-103H	0.701759	1.05104	2.0173	2.86061	41.8	49.77	1.418
AZ960	LXF-289	1.29041	0.794753	3.63427	2.21389	39.08	38.41	0.609
AZ960	TE-1	2.20965	1.09665	9.11252	2.99411	67.14	50.37	0.329
AZ960	K-562	2.26667	1.25337	9.64722	3.50213	63.7	44.7	0.363
AZ960	NCI-H522	1.46503	1.06279	4.32766	2.89445	33.12	27.46	0.669
AZ960	Hs-578-T	0.457759	0.52708	1.58053	1.69398	7.18	15.14	1.072
AZ960	RPMI-8226	0.154333	0.07152	1.16688	1.07414	7.95	53.66	0.921
AZ960	IGROV-1	1.06825	0.986654	2.91029	2.68224	7.84	7.64	0.922
AZ960	HOP-92	2.28208	1.28629	9.79707	3.61933	63.06	43.64	0.369
AZ960	LOXIMVI	0.14243	0.999315	1.15307	2.71642	135.58	601.62	2.356
AZ960	SF539	0.841848	0.939094	2.32065	2.55766	10.21	11.55	1.102
AZ960	Becker	1.60272	1.06732	4.96652	2.90759	41.46	33.41	0.585
AZ960	Daudi	0.233066	1.50635	1.26246	4.51023	257.26	546.32	3.573
AZ960	DB	1.47739	0.920721	4.38151	2.5111	42.69	37.68	0.573
AZ960	ECC10	-0.005456	0.801365	0.994559	2.22858	124.08	14787.8	2.241
AZ960	EM-2	-0.0399888	0.466921	0.9608	1.59508	66.02	1267.63	1.66
AZ960	FADU	1.87703	0.678873	6.53406	1.97165	69.82	63.83	0.302
AZ960	GDM-1	-0.67996	0.298924	0.506637	1.34841	166.15	143.96	2.661
AZ960	ESS-1	-0.11801	0.855782	0.888687	2.35321	164.8	825.18	2.648
AZ960	KALS-1	1.77292	1.31863	5.88805	3.7383	36.51	25.62	0.635
AZ960	KATOIII	1.55247	1.15924	4.72314	3.18749	32.51	25.33	0.675
AZ960	LAMA-84	-0.105024	0.0990152	0.900303	1.10408	22.63	194.28	1.226
AZ960	LP-1	1.70241	0.814859	5.48718	2.25886	58.83	52.14	0.412
AZ960	MOLT-16	-0.565208	-0.317559	0.568242	0.727924	28.1	43.82	1.281
AZ960	NOMO-1	1.57563	0.351598	4.83381	1.42134	70.6	77.69	0.294
AZ960	NCI-H1436	0.852116	0.361388	2.3446	1.43532	38.78	57.59	0.612
AZ960	ONS-76	2.25307	1.03448	9.51695	2.81365	70.44	54.09	0.296
AZ960	PF-382	1.77777	1.24651	5.91666	3.47817	41.21	29.88	0.588
AZ960	RKO	1.51418	0.9951	4.54568	2.70499	40.49	34.28	0.595
AZ960	SNU-423	1.96831	0.704214	7.15855	2.02226	71.75	64.22	0.282
AZ960	CA46	1.40239	0.978956	4.06492	2.66168	34.52	30.19	0.655
AZ960	BL-41	-0.497188	0.246853	0.608239	1.27999	110.44	149.65	2.104
AZ960	NCI-H146	2.23033	1.05807	9.30295	2.88081	69.03	52.56	0.31
AZ960	NCI-H1651	0.944074	1.10705	2.57043	3.02543	17.7	17.26	1.177
AZ960	SCC-4	1.09327	1.45626	2.98403	4.28989	43.76	33.2	1.438
AZ960	23132-87	1.50674	1.08075	4.51199	2.9469	34.69	28.27	0.653
AZ960	CAL-51	0.319958	1.08282	1.37707	2.95299	114.44	238.42	2.144
AZ960	MKN7	1.90001	1.44223	6.68597	4.23012	36.73	24.09	0.633
AZ960	BICR22	0.334304	1.03864	1.39697	2.82536	102.25	210.69	2.022
AZ960	Hs-683	-0.019058	0.91254	0.981122	2.49064	153.86	4888.23	2.539
AZ960	SNU-398	0.179742	0.889963	1.19691	2.43504	103.44	395.13	2.034
AZ960	TOV-21G	1.79898	0.584382	6.0435	1.79388	70.32	67.52	0.297
AZ960	DND-41	-0.06901	1.24028	0.933317	3.45658	270.35	1897.25	3.704
AZ960	EJM	0.775611	1.32378	2.17192	3.75758	73.01	70.68	1.73
AZ960	Hs-940-T	0.259136	1.53219	1.29581	4.62832	257.18	491.27	3.572
AZ960	OCI-M1	-1.04972	-0.190652	0.350036	0.82642	136.1	81.84	2.361
AZ960	JHOS-2	0.793041	1.76665	2.21011	5.85121	164.75	122.77	2.647
AZ960	OV-7	0.362672	1.01171	1.43716	2.75029	91.37	178.96	1.914
AZD1332	TE-8	1.86418	1.22497	6.45066	3.40407	47.23	34.29	0.528
AZD1332	LOXIMVI	1.72718	1.01381	5.62475	2.75609	51	41.3	0.49
AZD1332	CHP-212	1.53451	0.422635	4.63906	1.52598	67.11	72.46	0.329
AZD1332	EFO-27	2.14826	1.09257	8.56992	2.98192	65.2	49.14	0.348
AZD1332	NCI-H716	-1.70363	-0.47699	0.182021	0.620648	240.98	72	3.41
AZD1332	Saos-2	2.13739	1.30416	8.4773	3.6846	56.54	38.98	0.435
AZD1332	SW48	2.23545	1.00418	9.3507	2.72967	70.81	55.08	0.292
AZD1332	A4-Fuk	1.14887	0.36203	3.15464	1.43624	54.47	68.49	0.455
AZD1332	HCC-78	1.83972	0.860431	6.29478	2.36418	62.44	53.23	0.376
AZD2014	SK-ES-1	1.12793	1.16457	3.08924	3.20455	3.73	3.25	1.037
AZD2014	DMS-273	0.058217	0.28582	1.05994	1.33085	25.56	390.96	1.256
AZD2014	NCI-H929	-1.64534	0.275799	0.192947	1.31758	582.87	116.76	6.829
AZD2014	HPAF-II	1.49902	1.43932	4.47732	4.21781	5.8	3.98	0.942
AZD2014	KYSE-140	1.69881	0.483974	5.46743	1.62251	70.32	71.51	0.297
AZD2014	LCLC-103H	1.83873	1.29874	6.28857	3.66468	41.72	29.37	0.583
AZD2014	EKVX	2.21194	1.17869	9.13339	3.25012	64.41	46.71	0.356
AZD2014	LOXIMVI	0.249367	1.25496	1.28321	3.50769	173.35	403.26	2.734
AZD2014	SF539	0.637284	1.4682	1.89134	4.34143	129.54	130.38	2.295
AZD2014	AGS	1.82507	1.26935	6.20325	3.55855	42.63	30.45	0.574
AZD2014	A2058	0.930973	1.27	2.53698	3.56084	40.36	36.42	1.404
AZD2014	8305C	1.55662	0.968362	4.74276	2.63363	44.47	37.79	0.555
AZD2014	647-V	2.26259	1.89735	9.60799	6.66822	30.6	16.14	0.694
AZD2014	BT-20	0.541543	1.15025	1.71866	3.15897	83.8	112.4	1.838
AZD2014	COLO-679	2.02735	1.15088	7.59394	3.16097	58.38	43.23	0.416
AZD2014	CHP-212	1.55125	1.04172	4.71735	2.83408	39.92	32.85	0.601
AZD2014	Detroit562	0.771956	-0.220498	2.16399	0.802119	62.93	128.56	0.371
AZD2014	HGC-27	-0.264416	0.846355	0.767654	2.33113	203.67	420.08	3.037
AZD2014	HT-144	1.04276	1.48687	2.83704	4.42323	55.91	42.59	1.559
AZD2014	KARPAS-422	0.207316	1.16449	1.23037	3.20429	160.43	461.7	2.604
AZD2014	KMS-12-BM	1.11957	1.63988	3.06354	5.15456	68.26	46.47	1.683
AZD2014	LS-411N	0.20866	1.09915	1.23203	3.0016	143.63	426.76	2.436
AZD2014	NAMALWA	1.63155	1.43588	5.11178	4.20333	17.77	11.99	0.822
AZD2014	NOMO-1	2.05935	1.78725	7.8409	5.97299	23.82	13.21	0.762
AZD2014	NCI-N87	-0.015062	0.567381	0.985051	1.76364	79.04	3866.97	1.79
AZD2014	RS4-11	2.11199	1.12144	8.2647	3.06927	62.86	46.9	0.371
AZD2014	SW1088	1.87205	1.58988	6.5016	4.90316	24.59	15.07	0.754
AZD2014	OAW-42	1.10132	0.83792	3.00815	2.31155	23.16	23.92	0.768
AZD2014	BFTC-909	0.645205	1.08631	1.90638	2.96333	55.44	68.37	1.554
AZD2014	CAS-1	1.25572	1.64993	3.51035	5.20663	48.32	31.39	1.483
AZD2014	OCI-AML2	1.46844	1.31053	4.34245	3.70814	14.61	10.75	0.854
AZD2014	MDA-MB-415	1.62782	-0.409416	5.09277	0.664038	86.96	125.15	0.13
AZD2014	TE-6	1.37284	0.590652	3.94653	1.80516	54.26	56.98	0.457
AZD2014	NCI-H1944	0.737575	1.75917	2.09086	5.80761	177.76	138.51	2.778
AZD2014	OCI-AML3	1.60245	1.228	4.96518	3.41439	31.23	23.37	0.688
AZD2014	KMRC-20	2.20744	1.57117	9.09241	4.8123	47.07	28.82	0.529
AZD2014	TOV-112D	0.642286	1.96704	1.90082	7.14948	276.13	206.26	3.761
AZD2014	WM793B	1.71196	1.29519	5.53981	3.65167	34.08	24.34	0.659
AZD2014	HCC1500	1.16859	1.35272	3.21746	3.86792	20.22	15.76	1.202
AZD2014	MOLP-8	-0.804814	0.838668	0.447171	2.31328	417.32	204.21	5.173
AZD2014	NCI-H1876	-0.273243	1.69485	0.760908	5.44585	615.7	720.27	7.157
AZD2014	OCI-M1	0.941612	1.06325	2.56411	2.89578	12.93	12.92	1.129
AZD2014	SU-DHL-6	1.38017	0.320611	3.97559	1.37797	65.34	76.77	0.347
AZD2014	SNU-175	1.32	0.944752	3.74342	2.57218	31.29	28.43	0.687
AZD3759	SW48	-1.05394	-0.378875	0.348562	0.684631	96.42	64.05	1.964
AZD3759	HCC-827	-2.60284	-1.37922	0.0740632	0.251775	239.95	47.01	3.399
AZD4547	HCC1187	1.30757	0.811168	3.69718	2.25054	39.13	37.96	0.609
AZD4547	RPMI-8226	2.22567	1.16738	9.25972	3.21355	65.3	47.55	0.347
AZD4547	CHP-212	1.59975	1.23909	4.95179	3.45246	30.28	22.54	0.697
AZD4547	Daoy	1.78869	0.986773	5.98162	2.68256	55.15	44.83	0.448
AZD4547	Detroit562	2.20779	0.040374	9.09557	1.0412	88.55	98.17	0.114
AZD4547	EM-2	1.42627	1.05812	4.16312	2.88095	30.8	25.81	0.692
AZD4547	FADU	1.53969	0.665316	4.66313	1.94511	58.29	56.79	0.417
AZD4547	ESS-1	1.7191	1.13026	5.5795	3.09645	44.5	34.25	0.555
AZD4547	HCC1806	1.78139	1.1722	5.93809	3.2291	45.62	34.2	0.544
AZD4547	HSC-3	2.21364	0.981363	9.14898	2.66809	70.84	55.67	0.292
AZD4547	HuP-T3	2.0162	1.01064	7.50976	2.74736	63.42	49.87	0.366
AZD4547	LoVo	2.29618	0.802085	9.93611	2.23019	77.55	65.07	0.224
AZD4547	MES-SA	0.349263	1.06798	1.41802	2.90949	105.18	205.78	2.052
AZD4547	NCI-H1155	-0.231629	0.984714	0.79324	2.67705	237.48	525.13	3.375
AZD4547	RERF-LC-MS	2.28179	0.97894	9.79416	2.66163	72.82	57.1	0.272
AZD4547	MDA-MB-415	1.48911	-1.50831	4.43313	0.221283	95.01	201.29	0.05
AZD4547	TE-6	2.06004	0.643754	7.84625	1.90361	75.74	68.75	0.243
AZD4547	Caov-4	2.07399	1.29374	7.9565	3.64641	54.17	37.62	0.458
AZD4547	HCC-15	1.62473	1.14374	5.07705	3.13849	38.18	29.6	0.618
AZD4547	SNU-398	2.19193	0.510123	8.95249	1.6655	81.4	76.73	0.186
AZD4547	ALL-SIL	1.05028	0.653346	2.85846	1.92196	32.76	37.79	0.672
AZD4547	AMO-1	1.47591	1.13181	4.37502	3.10126	29.11	23.31	0.709
AZD4547	TOV-112D	1.60515	1.13561	4.97862	3.11308	37.47	29.25	0.625
AZD4547	MOLM-13	-1.22995	0.812518	0.292307	2.25358	670.96	166.06	7.71
AZD4547	NCI-H1341	0.8632	0.897696	2.37073	2.45394	3.51	4	1.035
AZD4547	SU-DHL-8	0.437532	0.841907	1.54888	2.32079	49.84	92.42	1.498
AZD4547	TE-4	1.54933	1.35885	4.70831	3.89172	17.34	12.29	0.827
AZD4547	SNU-175	2.21746	0.684273	9.18398	1.98233	78.42	69.14	0.216
AZD5153	A673	1.81348	0.862701	6.13176	2.36955	61.36	52.43	0.386
AZD5153	8-MG-BA	0.789046	0.75929	2.2013	2.13676	2.93	3.77	0.971
AZD5153	COR-L311	1.33899	-0.0274754	3.81517	0.972899	74.5	102.05	0.255
AZD5153	DMS-273	-0.52452	0.323923	0.591839	1.38254	133.6	161.76	2.336
AZD5153	NCI-H82	1.73372	-0.511432	5.66167	0.599636	89.41	129.5	0.106
AZD5153	HSC-2	0.298578	-0.541868	1.34794	0.581661	56.85	281.48	0.432
AZD5153	LXF-289	0.293968	0.978285	1.34174	2.65989	98.24	232.79	1.982
AZD5153	HCT-15	-1.2718	-1.16935	0.280327	0.310569	10.79	8.06	1.108
AZD5153	NCI-H23	1.86883	1.21914	6.4807	3.38426	47.78	34.76	0.522
AZD5153	T47D	2.2086	0.590255	9.10297	1.80445	80.18	73.27	0.198
AZD5153	RPMI-8226	-0.734632	-0.799727	0.479682	0.449452	6.3	8.86	0.937
AZD5153	IGROV-1	1.32478	0.816782	3.76134	2.26321	39.83	38.35	0.602
AZD5153	A2780	-1.23683	-1.06599	0.290303	0.344388	18.63	13.81	1.186
AZD5153	Detroit562	-0.141011	-0.673814	0.86848	0.509761	41.3	377.85	0.587
AZD5153	DK-MG	0.861694	0.593727	2.36717	1.81072	23.51	31.1	0.765
AZD5153	HOS	1.50158	1.49933	4.48876	4.4787	0.22	0.15	0.998
AZD5153	KU812	-2.67639	-2.31221	0.0688108	0.0990423	43.93	13.61	1.439
AZD5153	L-428	1.76802	1.51504	5.85922	4.54959	22.35	14.31	0.776
AZD5153	MHH-CALL-2	-1.51056	-0.639403	0.220786	0.527607	138.97	57.67	2.39
AZD5153	MKN1	-0.0401788	0.300008	0.960618	1.34987	40.52	846.68	1.405
AZD5153	NCI-H716	1.51859	1.30497	4.56577	3.68756	19.23	14.07	0.808
AZD5153	NCI-N87	0.386506	0.387516	1.47183	1.47332	0.1	0.26	1.001
AZD5153	NCI-H1155	-0.353087	0.95498	0.702516	2.59862	269.9	370.47	3.699
AZD5153	NCI-H28	1.30973	1.1396	3.70519	3.12553	15.64	12.99	0.844
AZD5153	RD	1.00589	-0.007376	2.73433	0.992651	63.7	100.73	0.363
AZD5153	REH	1.07372	0.795642	2.92624	2.21586	24.28	25.9	0.757
AZD5153	RS4-11	0.494711	-1.87109	1.64002	0.153956	90.61	478.22	0.094
AZD5153	Saos-2	1.46558	0.70125	4.33007	2.01627	53.44	52.15	0.466
AZD5153	SCC-9	1.3054	0.853482	3.68915	2.34781	36.36	34.62	0.636
AZD5153	SK-MEL-24	1.09202	1.43728	2.98028	4.20925	41.24	31.62	1.412
AZD5153	SK-UT-1	1.70625	1.86681	5.50827	6.46764	17.42	9.41	1.174
AZD5153	SNU-387	0.9091	0.378404	2.48209	1.45995	41.18	58.38	0.588
AZD5153	SW1417	1.06072	1.2287	2.88844	3.4168	18.29	15.84	1.183
AZD5153	OE33	1.49528	1.12953	4.4606	3.09421	30.63	24.46	0.694
AZD5153	COLO-684	0.615236	1.11012	1.85009	3.03472	64.03	80.44	1.64
AZD5153	CA46	-1.01581	0.62381	0.36211	1.86602	415.32	161.41	5.153
AZD5153	CAL-85-1	0.934096	0.91777	2.54491	2.5037	1.62	1.75	0.984
AZD5153	23132-87	0.629696	0.629468	1.87704	1.87661	0.02	0.04	1
AZD5153	CAS-1	1.61327	0.869932	5.01922	2.38675	52.45	46.08	0.476
AZD5153	CML-T1	1.70047	-0.535837	5.47654	0.585179	89.31	131.51	0.107
AZD5153	CAL-54	-1.20357	-0.911118	0.300122	0.402074	33.97	24.3	1.34
AZD5153	8505C	0.324229	0.944682	1.38296	2.572	85.98	191.36	1.86
AZD5153	BCPAP	1.40038	-0.0649816	4.05673	0.937085	76.9	104.64	0.231
AZD5153	CAMA-1	1.69678	-0.0853568	5.45634	0.918185	83.17	105.03	0.168
AZD5153	Jurkat	-0.936642	1.04898	0.391942	2.85475	628.36	211.99	7.284
AZD5153	OVISE	1.79545	0.271345	6.0222	1.31173	78.22	84.89	0.218
AZD5153	TT2609-C02	1.60102	0.899575	4.95807	2.45856	50.41	43.81	0.496
AZD5153	SUP-B15	-1.10088	-1.03886	0.332577	0.353858	6.4	5.63	1.064
AZD5153	OCI-AML3	-2.97196	-1.39059	0.0512026	0.248929	386.16	53.21	4.862
AZD5153	AMO-1	-2.7971	-3.38869	0.0609869	0.0337529	44.66	21.15	0.553
AZD5153	SW1271	1.56484	1.28959	4.78192	3.63129	24.06	17.59	0.759
AZD5153	KOPN-8	-1.53667	-1.9462	0.215095	0.142815	33.6	26.65	0.664
AZD5153	MOLM-13	-2.55007	-0.94444	0.0780759	0.388897	398.1	62.96	4.981
AZD5153	OCI-M1	-2.24574	-2.48878	0.10585	0.0830113	21.58	10.82	0.784
AZD5153	SU-DHL-5	-2.61548	-1.59763	0.0731324	0.202375	176.72	38.92	2.767
AZD5363	42-MG-BA	1.40268	1.25064	4.06607	3.49258	14.1	10.84	0.859
AZD5363	NCI-H446	1.66026	0.890341	5.26067	2.43596	53.69	46.37	0.463
AZD5363	NCI-H69	1.60629	1.6328	4.9843	5.1182	2.69	1.65	1.027
AZD5363	EC-GI-10	2.11613	1.48191	8.29898	4.40134	46.97	29.97	0.53
AZD5363	KNS-62	1.09203	1.33187	2.98032	3.78813	27.1	21.96	1.271
AZD5363	TE-8	1.65239	1.51647	5.21943	4.55611	12.71	8.23	0.873
AZD5363	HCT-15	2.20646	1.52056	9.08347	4.5748	49.64	31.09	0.504
AZD5363	T47D	1.95204	1.49062	7.04303	4.43986	36.96	23.64	0.63
AZD5363	A498	1.20068	0.954181	3.32237	2.59654	21.85	20.53	0.782
AZD5363	KM12	0.553328	0.662639	1.73903	1.93991	11.55	19.76	1.116
AZD5363	GDM-1	1.6635	1.24754	5.27775	3.48175	34.03	25.01	0.66
AZD5363	LS-411N	1.35165	1.44124	3.8638	4.22592	9.37	6.63	1.094
AZD5363	MEL-HO	1.78712	1.46406	5.97225	4.32347	27.61	18.08	0.724
AZD5363	NALM-6	0.536337	0.490805	1.70973	1.63363	4.45	8.49	0.955
AZD5363	OPM-2	0.826557	0.813819	2.28544	2.25651	1.27	1.54	0.987
AZD5363	P31-FUJ	1.64298	0.783287	5.17057	2.18865	57.67	52.33	0.423
AZD5363	SUP-T1	1.69906	1.29751	5.46882	3.66018	33.07	23.63	0.669
AZD5363	SW1088	1.30054	1.42492	3.67129	4.15753	13.24	9.56	1.132
AZD5363	THP-1	1.49328	1.16729	4.45166	3.21329	27.82	21.83	0.722
AZD5363	23132-87	0.994664	1.27866	2.70382	3.59182	32.84	28.55	1.328
AZD5363	COR-L279	2.25871	1.42932	9.57075	4.17586	56.37	36.72	0.436
AZD5363	CAS-1	2.13518	1.56585	8.45855	4.78675	43.41	26.66	0.566
AZD5363	RL95-2	0.171594	1.32878	1.1872	3.77644	218.1	674.38	3.181
AZD5363	EN	0.839157	1.60914	2.31442	4.99849	115.97	91.76	2.16
AZD5363	HARA	2.14082	1.42624	8.50637	4.16302	51.06	33.38	0.489
AZD5363	HCC-44	1.4024	1.39419	4.06495	4.0317	0.82	0.59	0.992
AZD5363	Hep3B2-1-7	1.0117	1.64328	2.75026	5.17208	88.06	62.43	1.881
AZD5363	NCI-H647	1.58973	1.55534	4.90244	4.73671	3.38	2.16	0.966
AZD5363	TOV-21G	0.959574	1.15131	2.61058	3.16235	21.14	19.98	1.211
AZD5363	NB4	1.97114	0.692763	7.17886	1.99923	72.15	64.85	0.278
AZD5363	JEKO-1	1.86258	0.740704	6.44036	2.09741	67.43	60.23	0.326
AZD5363	L-1236	1.57068	0.942812	4.80993	2.56719	46.63	39.97	0.534
AZD5363	PL-21	1.61444	1.56309	5.02506	4.77357	5	3.18	0.95
AZD5363	SU-DHL-5	-0.908047	-0.525989	0.403311	0.590971	46.53	42.07	1.465
AZD5363	OV-7	1.85332	1.47898	6.38095	4.38848	31.23	20.2	0.688
AZD5363	KMS-11	1.53463	1.02539	4.63959	2.78819	39.9	33.18	0.601
AZD5363	SNU-C5	2.06064	1.31777	7.85098	3.73509	52.43	36.05	0.476
AZD5438	DMS-273	1.59442	0.51117	4.92549	1.66724	66.15	67.94	0.338
AZD5438	NCI-H1963	1.08241	0.890864	2.95178	2.43723	17.43	17.7	0.826
AZD5438	HCC1954	0.9092	1.17673	2.48234	3.24376	30.67	29.42	1.307
AZD5438	HCC2157	1.01696	0.168961	2.76479	1.18407	57.17	83.39	0.428
AZD5438	TE-8	2.22534	1.31849	9.25667	3.73777	59.62	40.75	0.404
AZD5438	HCT-116	0.641806	1.625	1.89991	5.07843	167.3	153.19	2.673
AZD5438	HCT-15	0.97732	0.974867	2.65733	2.65082	0.24	0.25	0.998
AZD5438	SF539	1.38742	0.868564	4.00452	2.38349	40.48	37.4	0.595
AZD5438	A2058	1.61234	1.03423	5.01454	2.81293	43.9	35.86	0.561
AZD5438	BT-20	1.61628	1.0721	5.03434	2.92152	41.97	33.67	0.58
AZD5438	COLO-792	2.25807	1.14734	9.56457	3.14981	67.07	49.19	0.329
AZD5438	CHP-212	1.99235	0.61822	7.33273	1.85562	74.69	68.97	0.253
AZD5438	ECC10	0.767672	0.790653	2.15474	2.20484	2.32	2.99	1.023
AZD5438	GDM-1	1.15582	0.350342	3.17663	1.41955	55.31	69.69	0.447
AZD5438	GI-1	1.76973	0.669807	5.8693	1.95386	66.71	62.15	0.333
AZD5438	NUGC-3	2.28433	0.922701	9.81912	2.51608	74.38	59.61	0.256
AZD5438	OPM-2	0.506596	-0.074002	1.65963	0.92867	44.04	114.61	0.56
AZD5438	P12-ICHIKAWA	1.02136	0.369409	2.77696	1.44688	47.9	63.83	0.521
AZD5438	Raji	1.06959	0.55147	2.9142	1.7358	40.44	48.44	0.596
AZD5438	RKO	1.32564	1.36304	3.76459	3.90806	3.81	2.82	1.038
AZD5438	SNG-M	0.643038	1.21533	1.90225	3.3714	77.23	89	1.772
AZD5438	SNU-423	2.15075	1.3696	8.59128	3.93379	54.21	36.32	0.458
AZD5438	SUP-T1	1.52916	0.652614	4.61431	1.92055	58.38	57.32	0.416
AZD5438	AU565	1.95077	0.594207	7.03412	1.81159	74.25	69.54	0.258
AZD5438	BL-41	-0.550846	0.507658	0.576462	1.6614	188.21	192.16	2.882
AZD5438	NCI-H1651	2.29955	1.20667	9.96968	3.34234	66.47	47.53	0.335
AZD5438	RPMI-7951	0.698341	0.805495	2.01042	2.2378	11.31	15.34	1.113
AZD5438	CML-T1	1.09927	0.550394	3.00197	1.73394	42.24	49.93	0.578
AZD5438	NCI-H810	1.90465	1.10013	6.71706	3.00455	55.27	42.24	0.447
AZD5438	LCLC-97TM1	1.66547	1.47054	5.28814	4.35159	17.71	11.7	0.823
AZD5438	Jurkat	1.13956	0.467646	3.12539	1.59623	48.93	58.96	0.511
AZD5438	BICR22	0.596638	1.59927	1.816	4.9494	172.54	168.05	2.725
AZD5438	KYM-1	0.895688	0.288122	2.44902	1.33392	45.53	67.83	0.545
AZD5438	SNU-398	-0.0827432	1.09016	0.920588	2.97475	223.14	1417.52	3.231
AZD5438	EJM	1.78696	1.34475	5.97125	3.83723	35.74	24.75	0.643
AZD5438	RERF-LC-KJ	1.65943	1.39152	5.25632	4.02095	23.5	16.14	0.765
AZD5438	JURL-MK1	0.811854	-0.093046	2.25208	0.911152	59.54	111.46	0.405
AZD5438	ME-1	1.48696	1.73732	4.42364	5.68211	28.45	16.84	1.284
AZD5438	OVK-18	1.96276	1.13171	7.11897	3.10096	56.44	42.34	0.436
AZD5438	MM1S	0.400314	0.168588	1.49229	1.18363	20.68	57.89	0.793
AZD5991	NCI-H1623	-0.615367	-0.847752	0.540442	0.428377	20.74	37.76	0.793
AZD5991	NCI-H2122	1.39905	-2.56568	4.05134	0.076867	98.1	283.39	0.019
AZD5991	HCC1954	-3.01678	-0.277251	0.0489585	0.757864	1447.97	90.81	15.48
AZD5991	HL-60	-2.29291	0.83242	0.100973	2.29888	2176.73	136.3	22.767
AZD5991	SK-MEL-2	-0.209671	0.155256	0.810851	1.16796	44.04	174.05	1.44
AZD5991	BT-20	-2.40861	0.966259	0.0899398	2.62809	2822.06	140.12	29.221
AZD5991	CHP-212	-0.945803	0.477415	0.388368	1.6119	315.05	150.48	4.15
AZD5991	ECC10	1.76634	0.549835	5.84942	1.73297	70.37	68.87	0.296
AZD5991	EM-2	1.41107	-1.24958	4.10035	0.286624	93.01	188.56	0.07
AZD5991	KG-1	0.587431	0.538139	1.79936	1.71282	4.81	8.39	0.952
AZD5991	LOUCY	0.712123	0.123788	2.03831	1.13178	44.47	82.62	0.555
AZD5991	LP-1	-1.97671	0.356852	0.138524	1.42882	931.47	118.05	10.315
AZD5991	NOMO-1	-0.767614	0.651626	0.464119	1.91866	313.4	184.89	4.134
AZD5991	NCI-H524	2.10435	-0.162319	8.20179	0.85017	89.63	107.71	0.104
AZD5991	SKM-1	0.396934	0.303543	1.48726	1.35465	8.92	23.53	0.911
AZD5991	AU565	-1.79411	1.08621	0.166275	2.96303	1682.01	160.54	17.82
AZD5991	BL-41	-2.80781	-0.277368	0.060337	0.757776	1155.91	90.12	12.559
AZD5991	OCI-AML2	-1.01379	-2.58418	0.36284	0.0754581	79.2	154.9	0.208
AZD5991	RL95-2	1.01635	1.34109	2.7631	3.82319	38.37	31.95	1.384
AZD5991	SNU-398	-1.7563	-0.337358	0.172682	0.713654	313.28	80.79	4.133
AZD5991	L-1236	1.8622	-2.54449	6.43787	0.0785131	98.78	236.64	0.012
AZD5991	ME-1	-0.644253	0.926191	0.525055	2.52487	380.88	243.76	4.809
AZD5991	SU-DHL-6	-3.57532	-2.02231	0.0280064	0.132349	372.57	43.44	4.726
AZD6482	BT-20	1.27465	2.02013	3.57746	7.53932	110.75	58.48	2.107
AZD6482	COLO-800	2.21057	2.29055	9.12093	9.88033	8.33	3.62	1.083
AZD6482	THP-1	1.57149	1.88854	4.8138	6.60971	37.31	20.18	1.373
AZD6482	NU-DUL-1	0.937448	1.02197	2.55346	2.77866	8.82	9.02	1.088
AZD6482	PL-21	2.00352	1.65246	7.41511	5.2198	29.61	17.52	0.704
AZD6738	SK-ES-1	0.72882	0.530627	2.07263	1.7	17.98	27.19	0.82
AZD6738	COLO-829	1.65974	1.79977	5.25795	6.04827	15.03	8.44	1.15
AZD6738	5637	2.02712	1.21355	7.59217	3.3654	55.67	40.13	0.443
AZD6738	COR-L23	0.589148	1.01391	1.80245	2.75637	52.92	72.1	1.529
AZD6738	SBC-5	1.1083	0.510929	3.02921	1.66684	44.97	53.9	0.55
AZD6738	NCI-H2030	2.19854	1.38085	9.01188	3.97826	55.86	37.19	0.441
AZD6738	NCI-H2122	0.807202	0.329343	2.24163	1.39005	37.99	59.2	0.62
AZD6738	EPLC-272H	0.0729728	1.05959	1.0757	2.88518	168.21	1352.03	2.682
AZD6738	TE-1	1.5876	0.876751	4.89199	2.40308	50.88	44.78	0.491
AZD6738	TE-10	0.575075	1.23233	1.77726	3.42921	92.95	114.29	1.929
AZD6738	SK-OV-3	1.668	1.37095	5.30156	3.93909	25.7	17.81	0.743
AZD6738	SF295	1.56333	1.06405	4.77468	2.89808	39.3	31.94	0.607
AZD6738	COLO-679	1.72178	1.94129	5.59448	6.96772	24.55	12.75	1.245
AZD6738	D-283MED	-1.02554	0.472816	0.358603	1.60451	347.43	146.1	4.474
AZD6738	HGC-27	0.694116	0.565829	2.00194	1.76091	12.04	18.48	0.88
AZD6738	HSC-4	1.33278	1.54687	3.79158	4.69674	23.87	16.06	1.239
AZD6738	KMS-12-BM	0.665118	0.477089	1.94472	1.61138	17.14	28.27	0.829
AZD6738	L-428	1.53827	1.02375	4.65653	2.78362	40.22	33.45	0.598
AZD6738	MDA-MB-361	0.917814	1.65443	2.50381	5.2301	108.89	80.26	2.089
AZD6738	MDA-MB-453	1.68663	1.55526	5.40126	4.73631	12.31	7.79	0.877
AZD6738	MES-SA	1.90074	0.99814	6.69087	2.71323	59.45	47.49	0.406
AZD6738	NCI-H2196	1.04697	1.21991	2.84902	3.38689	18.88	16.52	1.189
AZD6738	P31-FUJ	0.838047	0.153681	2.31185	1.16612	49.56	81.66	0.504
AZD6738	Raji	0.587201	0.469306	1.79895	1.59888	11.12	20.08	0.889
AZD6738	RS4-11	0.870447	0.270522	2.38798	1.31065	45.11	68.92	0.549
AZD6738	SF126	1.49052	1.31876	4.4394	3.73876	15.78	11.52	0.842
AZD6738	SIG-M5	-0.647514	-0.0068754	0.523345	0.993148	89.77	98.94	1.898
AZD6738	SJSA-1	2.14428	0.925792	8.53586	2.52387	70.43	56.82	0.296
AZD6738	SK-MEL-30	1.48582	1.42967	4.41857	4.17731	5.46	3.78	0.945
AZD6738	SU-DHL-1	0.331299	0.008208	1.39278	1.00824	27.61	97.52	0.724
AZD6738	SW1088	2.05598	1.46186	7.8145	4.31397	44.8	28.9	0.552
AZD6738	TGBC11TKB	0.306289	1.21144	1.35838	3.35833	147.23	295.52	2.472
AZD6738	THP-1	0.943711	1.12142	2.5695	3.0692	19.45	18.83	1.194
AZD6738	A704	1.61539	1.30136	5.02986	3.67429	26.95	19.44	0.73
AZD6738	CAL-54	1.51308	1.0967	4.54069	2.99428	34.06	27.52	0.659
AZD6738	MKN45	1.31134	0.601691	3.71113	1.8252	50.82	54.12	0.492
AZD6738	TE-9	1.87731	1.46303	6.53589	4.31904	33.92	22.07	0.661
AZD6738	ES-2	1.59091	1.43784	4.9082	4.21161	14.19	9.62	0.858
AZD6738	HARA	0.251275	0.999416	1.28566	2.71669	111.31	297.74	2.113
AZD6738	IGR-37	1.5711	1.60932	4.81193	4.99943	3.9	2.43	1.039
AZD6738	NCI-H211	1.34101	0.526892	3.82291	1.69366	55.7	60.71	0.443
AZD6738	OVISE	0.845258	1.30425	2.32858	3.68492	58.25	54.3	1.582
AZD6738	CAL-29	0.970299	0.635442	2.63873	1.88786	28.46	34.51	0.715
AZD6738	CL-11	1.57349	1.46306	4.82347	4.31914	10.46	7.02	0.895
AZD6738	HCC-78	0.980184	0.616559	2.66495	1.85254	30.48	37.1	0.695
AZD6738	ALL-SIL	0.665263	0.392231	1.945	1.48028	23.89	41.04	0.761
AZD6738	NCI-H1568	2.28892	1.42777	9.86432	4.16937	57.73	37.62	0.423
AZD6738	OE21	1.15522	0.960125	3.17472	2.61202	17.72	16.89	0.823
AZD6738	NCI-H1341	1.10315	0.861012	3.01365	2.36555	21.51	21.95	0.785
AZD6738	OCI-M1	-0.327917	0.21533	0.720423	1.24027	72.16	165.67	1.722
AZD6738	PL-21	0.836099	0.967977	2.30735	2.63261	14.1	15.77	1.141
AZD6738	SU-DHL-10	0.96339	0.515623	2.62057	1.67468	36.09	46.48	0.639
AZD6738	OV-7	2.17762	1.02593	8.82527	2.78969	68.39	52.89	0.316
AZD7762	SK-ES-1	-0.667561	-1.69781	0.512958	0.183084	64.31	154.33	0.357
AZD7762	TCCSUP	0.037716	0.944247	1.03844	2.57088	147.57	2403.57	2.476
AZD7762	YKG-1	1.36989	-0.0995708	3.93491	0.905226	77	107.27	0.23
AZD7762	NCI-H2228	0.326371	-0.178905	1.38593	0.836186	39.67	154.82	0.603
AZD7762	NCI-H2342	1.76111	1.29684	5.81892	3.65772	37.14	26.36	0.629
AZD7762	COR-L311	0.788637	-1.43803	2.2004	0.237395	89.21	282.34	0.108
AZD7762	DMS-273	0.133393	-0.784099	1.1427	0.456531	60.05	687.81	0.4
AZD7762	NCI-H82	-0.600156	-0.396025	0.548726	0.67299	22.65	34.01	1.226
AZD7762	SK-N-FI	0.162705	-0.267276	1.17669	0.765462	34.95	264.27	0.651
AZD7762	SK-N-AS	-0.754132	-0.221781	0.470419	0.801091	70.29	70.59	1.703
AZD7762	NCI-H2087	1.39346	1.06334	4.02877	2.89602	28.12	23.69	0.719
AZD7762	Calu-6	-0.394644	0.507617	0.67392	1.66133	146.52	228.63	2.465
AZD7762	NCI-H2291	1.8757	0.498534	6.52539	1.64631	74.77	73.42	0.252
AZD7762	BEN	1.35194	0.670052	3.86493	1.95434	49.43	50.44	0.506
AZD7762	DMS-79	0.673192	1.00657	1.96049	2.73621	39.57	49.52	1.396
AZD7762	EC-GI-10	0.5657	-1.0895	1.76068	0.336385	80.89	292.59	0.191
AZD7762	HSC-2	0.332816	-1.34423	1.39489	0.260741	81.31	503.9	0.187
AZD7762	J82	1.66462	1.21715	5.28364	3.37754	36.08	26.88	0.639
AZD7762	TE-1	-0.411744	0.05847	0.662494	1.06021	60.03	114.2	1.6
AZD7762	TE-8	-0.492261	0.294734	0.611243	1.34277	119.68	159.87	2.197
AZD7762	HCT-15	0.213225	-0.0264656	1.23766	0.973882	21.31	112.41	0.787
AZD7762	A549	0.105684	-0.45329	1.11147	0.635534	42.82	528.91	0.572
AZD7762	MDA-MB-231	0.389524	0.405058	1.47628	1.49939	1.57	3.99	1.016
AZD7762	SW620	0.975337	0.19343	2.65206	1.2134	54.25	80.17	0.458
AZD7762	HOP-62	0.193912	0.619432	1.21399	1.85787	53.04	219.44	1.53
AZD7762	EM-2	-1.0682	-1.45238	0.343626	0.234012	31.9	35.97	0.681
AZD7762	GDM-1	-3.95409	0.0042486	0.0191762	1.00426	5137.01	100.11	52.37
AZD7762	H4	-0.785006	-1.74481	0.456117	0.174678	61.7	122.27	0.383
AZD7762	HH	0.602284	0.978344	1.82629	2.66005	45.65	62.44	1.457
AZD7762	HSC-4	-0.332731	0.571535	0.716963	1.77098	147.01	271.77	2.47
AZD7762	HT-144	1.11399	0.202698	3.04649	1.2247	59.8	81.8	0.402
AZD7762	KALS-1	-0.787122	1.15138	0.455153	3.16255	594.83	246.28	6.948
AZD7762	KARPAS-422	-1.03509	-0.266497	0.355194	0.766059	115.67	74.25	2.157
AZD7762	KMS-12-BM	-1.42968	-0.457242	0.239384	0.633027	164.44	68.02	2.644
AZD7762	L-428	-0.621076	-0.817969	0.537366	0.441327	17.87	31.7	0.821
AZD7762	L-540	-1.04372	-0.755839	0.352142	0.469616	33.36	27.58	1.334
AZD7762	LP-1	1.40246	1.24075	4.06518	3.4582	14.93	11.53	0.851
AZD7762	LS-513	0.715534	-0.354208	2.04528	0.701729	65.69	149.5	0.343
AZD7762	MDA-MB-361	-0.447694	-0.505302	0.6391	0.603323	5.6	12.87	0.944
AZD7762	MDA-MB-453	-0.551392	0.670366	0.576147	1.95495	239.31	221.58	3.393
AZD7762	MDA-MB-468	0.332571	0.129963	1.39455	1.13879	18.34	60.92	0.817
AZD7762	Mewo	1.38039	0.25609	3.97645	1.29187	67.51	81.45	0.325
AZD7762	NUGC-3	0.557386	-0.1557	1.7461	0.855816	50.99	127.93	0.49
AZD7762	NCI-H596	0.405333	0.727943	1.4998	2.07082	38.07	79.59	1.381
AZD7762	NCI-H1793	1.85171	0.939724	6.37068	2.55927	59.83	49.25	0.402
AZD7762	REH	-0.308213	-0.867331	0.734759	0.420071	42.83	181.41	0.572
AZD7762	RKO	-1.15941	-1.13985	0.313672	0.319867	1.97	1.69	1.02
AZD7762	Saos-2	0.602847	0.886129	1.82731	2.42572	32.75	46.99	1.327
AZD7762	SK-MEL-30	-1.24393	-0.589069	0.28825	0.554843	92.49	52.64	1.925
AZD7762	SK-MES-1	0.448179	0.252604	1.56546	1.28737	17.76	43.64	0.822
AZD7762	SNG-M	-0.239036	0.229381	0.787387	1.25782	59.75	195.96	1.597
AZD7762	SNU-423	0.405117	0.878525	1.49948	2.40735	60.55	116.86	1.605
AZD7762	SW837	0.426646	0.223878	1.53211	1.25092	18.35	47.53	0.816
AZD7762	THP-1	-1.23706	-0.035426	0.290236	0.965194	232.56	97.14	3.326
AZD7762	NCI-H838	-0.462569	-1.05146	0.629664	0.349428	44.51	127.31	0.555
AZD7762	PSN1	1.15084	-0.79806	3.16084	0.450202	85.76	169.35	0.142
AZD7762	OAW-42	0.829028	0.649875	2.29109	1.9153	16.4	21.61	0.836
AZD7762	COLO-684	-0.513376	-0.695043	0.598472	0.499053	16.61	35.39	0.834
AZD7762	RPMI-7951	-0.900405	-1.45832	0.406405	0.232626	42.76	61.96	0.572
AZD7762	23132-87	0.289922	-0.42485	1.33632	0.653868	51.07	246.54	0.489
AZD7762	AM-38	0.494948	0.097612	1.64041	1.10253	32.79	80.28	0.672
AZD7762	A4-Fuk	-2.51357	-1.28632	0.0809786	0.276286	241.18	48.83	3.412
AZD7762	TE-441-T	0.408013	0.356035	1.50383	1.42766	5.06	12.74	0.949
AZD7762	NCI-H810	-0.081299	-0.681581	0.921918	0.505816	45.13	738.36	0.549
AZD7762	PANC-03-27	-1.5725	-0.8621	0.207525	0.422275	103.48	45.18	2.035
AZD7762	RL95-2	0.456326	-0.412396	1.57826	0.662062	58.05	190.37	0.419
AZD7762	TE-9	-0.085696	1.034	0.917873	2.81229	206.39	1306.59	3.064
AZD7762	TE-6	0.674202	0.475904	1.96247	1.60947	17.99	29.41	0.82
AZD7762	BICR22	0.389181	-1.82193	1.47577	0.161713	89.04	568.15	0.11
AZD7762	CCK-81	-1.41804	-0.420675	0.242188	0.656603	171.11	70.33	2.711
AZD7762	EN	0.410941	1.19272	1.50824	3.29604	118.54	190.24	2.185
AZD7762	HCC-15	1.25219	-0.339717	3.49798	0.711972	79.65	127.13	0.204
AZD7762	HCC-366	1.96032	0.208421	7.1016	1.23173	82.66	89.37	0.173
AZD7762	LN-229	-0.528033	0.23337	0.589764	1.26285	114.13	144.2	2.141
AZD7762	ML-1	0.965893	1.06759	2.62713	2.90835	10.7	10.53	1.107
AZD7762	NCI-H196	1.77715	-0.049246	5.91298	0.951947	83.9	102.77	0.161
AZD7762	NCI-H647	-0.118021	0.038954	0.888678	1.03972	17	133.01	1.17
AZD7762	OVISE	-1.0648	1.32347	0.344797	3.75643	989.46	224.29	10.895
AZD7762	CAL-29	-0.202513	-1.16021	0.816676	0.31342	61.62	472.91	0.384
AZD7762	FU97	1.82843	0.861812	6.22413	2.36745	61.96	52.87	0.38
AZD7762	HCC-78	-0.22742	-1.21131	0.796586	0.297807	62.61	432.63	0.374
AZD7762	Hs-940-T	1.21369	0.0047148	3.3659	1.00473	70.15	99.61	0.299
AZD7762	KMRC-1	0.638036	-0.53361	1.89276	0.586484	69.01	183.63	0.31
AZD7762	KMRC-20	-0.144527	-0.540209	0.865432	0.582627	32.68	273.78	0.673
AZD7762	RKN	1.86356	0.647086	6.44665	1.90997	70.37	65.28	0.296
AZD7762	TOV-112D	0.059194	-0.950921	1.06098	0.386385	63.58	1706.45	0.364
AZD7762	JM1	-0.956984	-2.32604	0.384049	0.097682	74.57	143.06	0.254
AZD7762	KOPN-8	-1.6834	-1.85016	0.185742	0.157212	15.36	9.91	0.846
AZD7762	ME-1	0.329078	0.751696	1.38969	2.12059	52.6	128.42	1.526
AZD7762	MOLM-13	-5.89939	-2.24344	0.00274111	0.106093	3770.43	61.97	38.704
AZD7762	NCI-H1341	-0.795189	-0.698025	0.451496	0.497567	10.2	12.22	1.102
AZD7762	NU-DUL-1	-3.11269	-1.83346	0.0444811	0.159859	259.39	41.1	3.594
AZD7762	OCI-LY-19	-1.53277	-1.66654	0.215937	0.188899	12.52	8.73	0.875
AZD7762	SU-DHL-4	-1.03132	-0.548427	0.356534	0.577858	62.08	46.82	1.621
AZD7762	JHOS-2	1.53739	-0.206902	4.65245	0.813099	82.52	113.46	0.175
AZD7762	SNU-175	0.485364	-1.25869	1.62477	0.284025	82.52	359.33	0.175
AZD8055	NCI-H1623	0.048222	-0.704212	1.0494	0.494498	52.88	1560.35	0.471
AZD8055	DMS-114	-0.100746	0.283697	0.904163	1.32803	46.88	381.6	1.469
AZD8055	NCI-H446	-1.37054	-0.581822	0.253969	0.558879	120.06	57.55	2.201
AZD8055	NCI-H929	-4.16569	-1.51009	0.015519	0.22089	1323.35	63.75	14.233
AZD8055	SK-N-AS	0.54903	-0.282986	1.73157	0.753531	56.48	151.54	0.435
AZD8055	Calu-6	0.06267	-0.411174	1.06468	0.662872	37.74	756.09	0.623
AZD8055	KYSE-520	0.322183	-0.495668	1.38014	0.609164	55.86	253.85	0.441
AZD8055	A498	-1.39639	0.210966	0.247489	1.23487	398.96	115.11	4.99
AZD8055	BT-549	-0.652328	-0.494173	0.520832	0.610075	17.13	24.24	1.171
AZD8055	RPMI-8226	-1.78515	-0.385585	0.167772	0.680053	305.34	78.4	4.053
AZD8055	LOXIMVI	-1.12794	-0.682229	0.323698	0.505489	56.16	39.52	1.562
AZD8055	AGS	-1.45121	-1.01764	0.234287	0.361446	54.27	29.88	1.543
AZD8055	CFPAC-1	-1.1912	-1.53154	0.303855	0.216202	28.85	28.57	0.712
AZD8055	CAL-120	-1.87506	-0.759234	0.153346	0.468025	205.21	59.51	3.052
AZD8055	CAL-62	-0.364378	-0.982669	0.694629	0.374311	46.11	169.68	0.539
AZD8055	DB	-1.34476	-0.152953	0.260603	0.85817	229.3	88.63	3.293
AZD8055	DU-4475	-0.676289	-1.404	0.5085	0.245612	51.7	107.6	0.483
AZD8055	GI-1	-0.874443	-0.899796	0.417094	0.406653	2.5	2.9	0.975
AZD8055	HCC1419	0.417692	-0.293854	1.51845	0.745385	50.91	170.35	0.491
AZD8055	HCC1569	-0.710124	-0.201229	0.491583	0.817725	66.35	71.66	1.663
AZD8055	HCC70	-0.794972	-0.555929	0.451594	0.573539	27	30.07	1.27
AZD8055	L-428	-0.627684	-0.794383	0.533827	0.45186	15.35	26.56	0.846
AZD8055	LoVo	-2.43167	-1.02875	0.0878896	0.357452	306.71	57.69	4.067
AZD8055	MHH-CALL-2	-0.771671	-0.514235	0.46224	0.597958	29.36	33.36	1.294
AZD8055	NAMALWA	0.070494	-0.217858	1.07304	0.80424	25.05	409.04	0.749
AZD8055	NCI-H747	-0.914998	-0.579039	0.400517	0.560437	39.93	36.72	1.399
AZD8055	NCI-H716	-0.170133	-0.413808	0.843552	0.661128	21.63	143.23	0.784
AZD8055	NCI-H358	-0.788794	-0.954412	0.454392	0.385038	15.26	21	0.847
AZD8055	NCI-H1155	0.531474	-0.913677	1.70144	0.401047	76.43	271.91	0.236
AZD8055	P12-ICHIKAWA	0.402523	-0.096764	1.49559	0.90777	39.3	124.04	0.607
AZD8055	SJSA-1	-0.806165	-0.45665	0.446567	0.633402	41.84	43.36	1.418
AZD8055	SNU-423	-1.00567	-0.233896	0.365799	0.791444	116.36	76.74	2.164
AZD8055	SUP-T1	-0.71504	-0.838778	0.489173	0.432238	11.64	17.31	0.884
AZD8055	SW48	-1.22841	-1.30009	0.292757	0.272508	6.92	5.83	0.931
AZD8055	T84	0.623715	0.0070106	1.86585	1.00704	46.03	98.88	0.54
AZD8055	YH-13	-1.54112	-1.00656	0.214141	0.365476	70.67	34.69	1.707
AZD8055	KM-H2	-0.102202	-0.372261	0.902847	0.689174	23.67	264.24	0.763
AZD8055	OAW-42	-1.93434	-1.1877	0.144519	0.304922	110.99	38.6	2.11
AZD8055	COLO-684	-1.1731	-0.355242	0.309407	0.701003	126.56	69.72	2.266
AZD8055	C2BBe1	0.312687	0.194647	1.36709	1.21488	11.13	37.75	0.889
AZD8055	AU565	-0.618453	-0.622763	0.538777	0.53646	0.43	0.7	0.996
AZD8055	23132-87	0.264418	-1.31886	1.30267	0.267439	79.47	598.78	0.205
AZD8055	CAS-1	-0.747568	-0.129528	0.473517	0.87851	85.53	82.67	1.855
AZD8055	CAL-54	-1.47031	-1.11575	0.229854	0.327671	42.56	24.11	1.426
AZD8055	HDLM-2	-0.733922	-0.16169	0.480023	0.850705	77.22	77.97	1.772
AZD8055	PANC-08-13	0.455032	0.103754	1.57622	1.10933	29.62	77.2	0.704
AZD8055	TE-6	-1.58691	-0.711302	0.204557	0.491005	140.03	55.18	2.4
AZD8055	CAMA-1	-1.00924	-0.479063	0.364494	0.619364	69.92	52.53	1.699
AZD8055	LS-180	-0.42307	-0.542768	0.655033	0.581138	11.28	28.29	0.887
AZD8055	HCC-15	0.462563	-0.290852	1.58814	0.747627	52.92	162.88	0.471
AZD8055	NCI-H2023	-1.35328	-1.0256	0.258391	0.358582	38.78	24.21	1.388
AZD8055	OVISE	0.516335	-0.482641	1.67587	0.617151	63.17	193.47	0.368
AZD8055	SUP-B15	-0.311364	-0.261878	0.732447	0.769605	5.07	15.89	1.051
AZD8055	OVTOKO	-1.28634	0.127626	0.276281	1.13613	311.22	109.92	4.112
AZD8055	PANC-04-03	-0.284263	0.65441	0.752569	1.92401	155.66	330.21	2.557
AZD8055	PA-TU-8902	-0.356565	-0.687	0.700077	0.503083	28.14	92.67	0.719
AZD8055	JURL-MK1	-1.67156	-1.25986	0.187954	0.283693	50.94	24.63	1.509
AZD8055	KCL-22	-1.50155	-0.531451	0.222785	0.587752	163.82	64.61	2.638
AZD8055	L-1236	0.245182	-0.856862	1.27785	0.424492	66.78	449.48	0.332
AZD8055	SU-DHL-5	-2.09732	-1.52232	0.122786	0.218205	77.71	27.42	1.777
AZD8055	MM1S	-1.74918	-1.48638	0.173916	0.22619	30.06	15.02	1.301
AZD8186	42-MG-BA	1.91128	1.54191	6.76171	4.67352	30.88	19.33	0.691
AZD8186	NCI-H1648	1.37502	0.097796	3.95515	1.10274	72.12	92.89	0.279
AZD8186	NCI-H446	2.11732	1.27038	8.30884	3.56219	57.13	40	0.429
AZD8186	NCI-H2291	2.03318	1.21012	7.63832	3.35388	56.09	40.48	0.439
AZD8186	EBC-1	1.98046	1.32452	7.24606	3.76039	48.1	33.12	0.519
AZD8186	SNB75	2.19717	1.91932	8.99948	6.81629	24.26	12.65	0.757
AZD8186	Detroit562	2.25057	0.896245	9.49316	2.45039	74.19	60.18	0.258
AZD8186	DOHH-2	0.314234	0.059048	1.36921	1.06083	22.52	81.21	0.775
AZD8186	GAMG	1.75599	1.77916	5.7892	5.92486	2.34	1.32	1.023
AZD8186	MEL-HO	1.6737	1.15502	5.33185	3.1741	40.47	30.99	0.595
AZD8186	SK-CO-1	1.72461	0.964396	5.61034	2.6232	53.24	44.08	0.468
AZD8186	SW48	1.44786	0.950458	4.25402	2.58689	39.19	34.35	0.608
AZD8186	AU565	1.89522	1.4276	6.65401	4.16868	37.35	24.67	0.626
AZD8186	A704	1.47199	1.63047	4.3579	5.10628	17.17	10.77	1.172
AZD8186	A101D	1.90749	1.13629	6.73613	3.11518	53.75	40.43	0.462
AZD8186	NB1	2.27001	1.01684	9.6795	2.76445	71.44	55.21	0.286
AZD8186	FU97	2.05312	1.67686	7.79216	5.34873	31.36	18.33	0.686
AZD8186	OVTOKO	1.73164	1.58	5.64993	4.85493	14.07	8.76	0.859
AZD8186	NB4	1.09427	1.08951	2.987	2.97283	0.47	0.43	0.995
AZD8186	MOLM-16	2.21748	0.646332	9.18414	1.90853	79.22	70.85	0.208
AZD8186	MOLP-8	1.79934	1.16446	6.04568	3.2042	47	35.28	0.53
AZD8186	SU-DHL-5	-1.19568	-0.367024	0.302498	0.692793	129.02	69.3	2.29
BI-2536	42-MG-BA	-0.33469	-2.26731	0.71556	0.10359	85.52	577.44	0.145
BI-2536	U-118-MG	0.785807	-1.84768	2.19418	0.157602	92.82	335.13	0.072
BI-2536	YKG-1	-1.53216	-1.01618	0.216069	0.361974	67.53	33.68	1.675
BI-2536	DMS-114	-2.05837	0.827706	0.127662	2.28806	1692.28	140.21	17.923
BI-2536	NCI-H1048	-3.26565	-3.12681	0.0381723	0.0438576	14.89	4.25	1.149
BI-2536	NCI-H2087	-0.173218	1.07774	0.840954	2.93804	249.37	722.19	3.494
BI-2536	SHP-77	-3.76311	0.028214	0.0232115	1.02862	4331.49	100.75	44.315
BI-2536	SW1573	-0.477633	1.09208	0.62025	2.98046	380.53	328.64	4.805
BI-2536	TE-5	-0.903877	-0.0773692	0.404996	0.925548	128.53	91.44	2.285
BI-2536	HCC1395	0.775455	-1.87722	2.17158	0.153015	92.95	342.08	0.07
BI-2536	BHY	1.05876	0.629304	2.8828	1.8763	34.91	40.56	0.651
BI-2536	KYSE-140	0.729195	-1.01645	2.07341	0.361877	82.55	239.39	0.175
BI-2536	KYSE-520	0.956946	0.0310874	2.60373	1.03158	60.38	96.75	0.396
BI-2536	LXF-289	-2.4974	-2.28254	0.0822985	0.102025	23.97	8.6	1.24
BI-2536	TE-10	-3.84923	0.657827	0.0212961	1.93059	8965.46	117.09	90.655
BI-2536	HCT-15	-0.528329	-2.14384	0.589589	0.117203	80.12	305.78	0.199
BI-2536	NCI-H522	-2.7517	0.672446	0.063819	1.95902	2969.65	124.44	30.697
BI-2536	ACHN	0.637328	-1.97792	1.89142	0.138356	92.69	410.35	0.073
BI-2536	BT-549	-1.22272	1.25988	0.294429	3.52498	1097.23	203.04	11.972
BI-2536	SK-MEL-28	-0.577932	0.39805	0.561057	1.48892	165.38	168.87	2.654
BI-2536	IGROV-1	-2.39108	-0.313515	0.0915308	0.730873	698.5	86.89	7.985
BI-2536	LOXIMVI	-2.39946	-1.51186	0.0907666	0.220498	142.93	36.99	2.429
BI-2536	SF268	0.838098	-0.422393	2.31197	0.655476	71.65	150.4	0.284
BI-2536	KM12	-2.09081	-1.36809	0.123587	0.254592	106	34.57	2.06
BI-2536	AGS	-1.90548	-2.76464	0.148752	0.0629988	57.65	45.09	0.424
BI-2536	Daoy	-3.81766	-3.46419	0.0219792	0.0312982	42.4	9.26	1.424
BI-2536	D-283MED	-4.1104	-3.53388	0.0164013	0.0291914	77.98	14.03	1.78
BI-2536	Detroit562	-2.98643	-1.20576	0.0504672	0.299463	493.38	59.63	5.934
BI-2536	GAMG	-3.85863	-0.728191	0.0210969	0.482781	2188.4	81.13	22.884
BI-2536	ESS-1	-0.306901	-3.46908	0.735724	0.0311457	95.77	1030.36	0.042
BI-2536	H4	-3.01224	-3.90011	0.0491812	0.0202397	58.85	29.48	0.412
BI-2536	HSC-3	0.156839	-2.59749	1.16981	0.0744599	93.63	1756.16	0.064
BI-2536	HT-1080	-1.41683	-0.915539	0.242481	0.400301	65.09	35.38	1.651
BI-2536	HuCCT1	1.57635	-1.34716	4.83727	0.259977	94.63	185.46	0.054
BI-2536	IGR-1	-2.08473	-2.45545	0.124341	0.0858246	30.98	17.78	0.69
BI-2536	KATOIII	1.721	0.232256	5.59012	1.26144	77.43	86.5	0.226
BI-2536	KYSE-180	-2.24146	-1.70646	0.106303	0.181507	70.74	23.87	1.707
BI-2536	L-540	-3.09336	-3.7542	0.0453491	0.0234192	48.36	21.36	0.516
BI-2536	LP-1	-2.15944	-0.276093	0.11539	0.758742	557.55	87.21	6.575
BI-2536	LS-123	0.932509	0.20692	2.54088	1.22988	51.6	77.81	0.484
BI-2536	MES-SA	-3.29916	-1.46638	0.0369141	0.230758	525.12	55.55	6.251
BI-2536	MFE-296	-0.598473	1.42368	0.54965	4.15236	655.45	337.88	7.555
BI-2536	NCI-H747	0.812	0.267056	2.25241	1.30611	42.01	67.11	0.58
BI-2536	NCI-H358	0.844705	-0.581319	2.32729	0.55916	75.97	168.82	0.24
BI-2536	NCI-H1105	-1.21385	0.08026	0.297051	1.08357	264.78	106.61	3.648
BI-2536	OPM-2	-4.85385	-2.46307	0.00779832	0.0851735	992.2	49.26	10.922
BI-2536	RPMI-8402	-6.24784	-4.92452	0.00193463	0.0072662	275.59	21.18	3.756
BI-2536	RT-112	-3.13844	0.318483	0.0433505	1.37504	3071.91	110.15	31.719
BI-2536	SF126	-2.07339	-1.67577	0.125759	0.187163	48.83	19.18	1.488
BI-2536	SK-CO-1	0.914324	-1.04215	2.49509	0.352697	85.86	213.98	0.141
BI-2536	SK-MEL-31	1.50951	0.373405	4.52451	1.45267	67.89	75.26	0.321
BI-2536	SNU-387	0.0344468	0.229758	1.03505	1.2583	21.57	566.99	1.216
BI-2536	SW48	-1.27811	-2.53593	0.278563	0.079188	71.57	98.41	0.284
BI-2536	KM-H2	-3.67673	-2.9482	0.0253056	0.052434	107.2	19.81	2.072
BI-2536	PSN1	0.043332	-1.19483	1.04428	0.302755	71.01	2857.39	0.29
BI-2536	CW-2	-1.57154	0.496968	0.207725	1.64373	691.3	131.62	7.913
BI-2536	23132-87	-2.98243	-0.929706	0.0506697	0.39467	678.91	68.83	7.789
BI-2536	AM-38	-1.79335	0.0473988	0.166401	1.04854	530.13	102.64	6.301
BI-2536	OCI-AML2	-4.4825	-3.55667	0.0113051	0.0285338	152.4	20.65	2.524
BI-2536	8505C	1.71892	-1.14422	5.57848	0.318471	94.29	166.57	0.057
BI-2536	TE-441-T	-0.739429	-1.86839	0.477386	0.154373	67.66	152.68	0.323
BI-2536	TE-9	0.200268	-0.887512	1.22173	0.411679	66.3	543.16	0.337
BI-2536	TE-11	-3.02642	-2.87501	0.0484887	0.0564158	16.35	5	1.163
BI-2536	LCLC-97TM1	-2.95802	-0.955721	0.0519219	0.384535	640.6	67.69	7.406
BI-2536	Caov-4	2.21878	-0.887114	9.1961	0.411842	95.52	139.98	0.045
BI-2536	Jurkat	-4.01608	-3.53384	0.0180235	0.0291926	61.97	12.01	1.62
BI-2536	CCK-81	-2.59304	-1.19306	0.0747926	0.303292	305.51	53.99	4.055
BI-2536	HCC-366	0.216923	-2.29467	1.24225	0.100795	91.89	1157.83	0.081
BI-2536	HCC-44	-2.39808	-1.03797	0.090892	0.354173	289.66	56.72	3.897
BI-2536	HCC-827	-0.024598	0.23953	0.975702	1.27065	30.23	1073.78	1.302
BI-2536	NCI-H1915	-3.01343	0.0519908	0.049123	1.05337	2044.34	101.73	21.443
BI-2536	NCI-H1944	-1.58303	-1.08772	0.205351	0.336985	64.1	31.29	1.641
BI-2536	PA-TU-8988T	-0.519843	-3.67906	0.594614	0.0252468	95.75	607.72	0.042
BI-2536	DAN-G	-0.761888	-0.239652	0.466784	0.786901	68.58	68.54	1.686
BI-2536	EJM	-3.26476	0.229322	0.0382062	1.25775	3192	107.02	32.92
BI-2536	NCI-H2172	-0.605282	-0.404568	0.54592	0.667265	22.23	33.16	1.222
BI-2536	NUGC-4	0.49405	0.132297	1.63894	1.14145	30.35	73.22	0.696
BI-2536	OE21	-0.09936	-0.865491	0.905417	0.420845	53.52	771.07	0.465
BI-2536	PANC-02-03	-0.407834	-0.222741	0.665089	0.800322	20.33	45.38	1.203
BI-2536	VCaP	-1.07547	0.695599	0.341136	2.00491	487.72	164.68	5.877
BI-2536	NB4	-5.19225	-3.95943	0.00555947	0.0190741	243.09	23.74	3.431
BI-2536	JM1	-3.94131	-3.08472	0.0194228	0.0457428	135.51	21.73	2.355
BI-2536	KOPN-8	-3.31918	-4.33511	0.0361826	0.0131004	63.79	30.61	0.362
BI-2536	MOLM-16	-3.04283	-4.44539	0.0476998	0.0117326	75.4	46.09	0.246
BI-2536	NCI-H1341	-2.53721	-2.13256	0.0790866	0.118533	49.88	15.95	1.499
BI-2536	OCI-AML5	-3.89802	-3.29834	0.020282	0.0369444	82.15	15.38	1.822
BI-2536	OCI-M1	-3.66759	-4.53859	0.025538	0.0106885	58.15	23.75	0.419
BI-2536	PL-21	-4.81759	-0.80534	0.00808621	0.446936	5427.14	83.28	55.271
BI-2536	JHOS-2	-1.36841	-0.145617	0.254512	0.864489	239.66	89.36	3.397
BI-2536	SNU-407	-1.81412	-3.38729	0.162981	0.0338003	79.26	86.72	0.207
BMS-536924	RT4	2.04332	1.5345	7.71622	4.63898	39.88	24.9	0.601
BMS-536924	8-MG-BA	1.50759	1.04605	4.51583	2.84639	36.97	30.61	0.63
BMS-536924	NCI-H2228	0.126029	1.24861	1.13432	3.48551	207.28	890.73	3.073
BMS-536924	DMS-114	1.9278	1.14464	6.8744	3.14131	54.3	40.62	0.457
BMS-536924	NCI-H1963	1.98454	1.03101	7.27573	2.8039	61.46	48.05	0.385
BMS-536924	NCI-H2122	-1.45881	0.62421	0.232512	1.86677	702.87	142.79	8.029
BMS-536924	NCI-H929	-2.19777	0.225259	0.111051	1.25265	1027.99	110.25	11.28
BMS-536924	NCI-H727	1.11832	1.77399	3.05971	5.89431	92.64	58.63	1.926
BMS-536924	NCI-H1792	0.779044	1.31931	2.17939	3.74082	71.65	69.35	1.716
BMS-536924	HCC1143	0.773862	0.87368	2.16812	2.39571	10.5	12.9	1.105
BMS-536924	A498	1.27386	1.11018	3.57464	3.03489	15.1	12.85	0.849
BMS-536924	Hs-578-T	1.86946	1.13938	6.48477	3.12483	51.81	39.05	0.482
BMS-536924	EKVX	1.92081	1.7092	6.82645	5.52455	19.07	11.02	0.809
BMS-536924	A375	1.02309	0.407261	2.78178	1.5027	45.98	60.19	0.54
BMS-536924	COLO-792	1.025	0.91587	2.7871	2.49895	10.34	10.65	0.897
BMS-536924	CAL-62	2.04162	1.064	7.70309	2.89795	62.38	47.88	0.376
BMS-536924	DBTRG-05MG	2.27672	2.1741	9.74465	8.79425	9.75	4.51	0.902
BMS-536924	DOHH-2	1.60119	0.943778	4.95892	2.56967	48.18	41.06	0.518
BMS-536924	DU-4475	1.47117	0.015544	4.35434	1.01567	76.67	98.94	0.233
BMS-536924	ESS-1	1.34264	1.2501	3.82913	3.49069	8.84	6.89	0.912
BMS-536924	HOS	2.12221	1.63023	8.34959	5.10504	38.86	23.18	0.611
BMS-536924	HSC-4	1.81964	2.24024	6.16965	9.39557	52.29	23.11	1.523
BMS-536924	HT-1197	1.94707	0.757701	7.00811	2.13337	69.56	61.09	0.304
BMS-536924	JVM-3	0.27534	0.780992	1.31698	2.18364	65.81	183.65	1.658
BMS-536924	KATOIII	1.3998	-1.15318	4.05441	0.31563	92.22	182.38	0.078
BMS-536924	KG-1	1.80871	0.928795	6.10258	2.53146	58.52	48.65	0.415
BMS-536924	L-540	1.31865	1.16331	3.73839	3.2005	14.39	11.78	0.856
BMS-536924	MKN1	1.88642	1.50064	6.59573	4.48455	32.01	20.45	0.68
BMS-536924	NALM-6	1.17156	0.615418	3.22701	1.85043	42.66	47.47	0.573
BMS-536924	NCI-H747	1.00584	0.80965	2.73419	2.24712	17.81	19.5	0.822
BMS-536924	NCI-H596	0.702126	1.44549	2.01804	4.24393	110.3	105.87	2.103
BMS-536924	NCI-H28	2.10836	0.894033	8.2347	2.44497	70.31	57.6	0.297
BMS-536924	RPMI-8402	0.492489	0.608684	1.63638	1.83801	12.32	23.59	1.123
BMS-536924	SF126	2.13575	1.00863	8.4634	2.74185	67.6	52.77	0.324
BMS-536924	SIG-M5	2.01892	0.525905	7.53017	1.69199	77.53	73.95	0.225
BMS-536924	SK-MEL-3	1.56708	1.21928	4.79264	3.38476	29.38	22.19	0.706
BMS-536924	SNU-387	1.49066	1.266	4.44004	3.54665	20.12	15.07	0.799
BMS-536924	SNU-449	2.14499	1.87435	8.54191	6.51657	23.71	12.62	0.763
BMS-536924	SW48	-0.561273	0.42722	0.570482	1.53299	168.72	176.12	2.687
BMS-536924	COLO-668	1.03414	1.74798	2.81269	5.74302	104.18	69.03	2.042
BMS-536924	BFTC-909	2.04094	1.19565	7.69786	3.30569	57.06	41.42	0.429
BMS-536924	BL-41	1.82852	0.54669	6.22468	1.72753	72.25	70.1	0.278
BMS-536924	RPMI-7951	1.41899	1.06535	4.13295	2.90185	29.79	24.92	0.702
BMS-536924	RERF-LC-MS	0.672176	0.985492	1.95849	2.67913	36.8	46.61	1.368
BMS-536924	HDLM-2	-0.558682	1.3568	0.571962	3.88376	579.02	342.86	6.79
BMS-536924	HCC-15	1.6707	0.859501	5.31588	2.36198	55.57	48.55	0.444
BMS-536924	HCC-366	1.66433	1.36447	5.28215	3.91366	25.91	18.02	0.741
BMS-536924	NCI-H1944	2.29706	1.48512	9.9449	4.4155	55.6	35.35	0.444
BMS-536924	DND-41	1.88084	1.21475	6.55899	3.36944	48.63	35.41	0.514
BMS-536924	OCUM-1	1.05686	0.934683	2.87732	2.54641	11.5	11.56	0.885
BMS-536924	VCaP	1.98557	1.49207	7.28321	4.44628	38.95	24.85	0.61
BMS-536924	OV-7	1.06619	1.38537	2.90429	3.99629	37.6	29.94	1.376
BMS-536924	MM1S	-1.33359	0.744916	0.26353	2.10626	699.25	155.86	7.993
BMS-536924	SNU-407	1.23611	0.95672	3.44221	2.60314	24.38	22.6	0.756
BMS-754807	NCI-H1048	0.897662	0.856755	2.45386	2.3555	4.01	4.56	0.96
BMS-754807	NCI-H1963	-0.033344	0.884618	0.967206	2.42206	150.42	2753.01	2.504
BMS-754807	NCI-H2227	0.099016	-0.43726	1.10408	0.645804	41.51	541.6	0.585
BMS-754807	NCI-H69	1.6459	0.385916	5.1857	1.47096	71.63	76.55	0.284
BMS-754807	SBC-5	1.02528	0.679652	2.78788	1.97319	29.22	33.71	0.708
BMS-754807	NCI-H929	-4.67242	-0.24585	0.00934962	0.78204	8264.4	94.74	83.644
BMS-754807	NCI-H727	1.98875	1.40597	7.30638	4.07949	44.17	29.3	0.558
BMS-754807	NCI-H2009	0.874316	0.17328	2.39724	1.1892	50.39	80.18	0.496
BMS-754807	BEN	1.62642	1.65068	5.08566	5.21054	2.46	1.49	1.025
BMS-754807	LXF-289	0.097177	0.828276	1.10206	2.28937	107.74	752.34	2.077
BMS-754807	COLO-792	0.750427	0.527989	2.1179	1.69552	19.94	29.64	0.801
BMS-754807	Detroit562	-0.074668	0.210011	0.928052	1.23369	32.93	381.26	1.329
BMS-754807	DK-MG	1.65941	1.29943	5.25623	3.66719	30.23	21.69	0.698
BMS-754807	GAMG	2.21507	0.400945	9.16205	1.49324	83.7	81.9	0.163
BMS-754807	KMS-12-BM	-2.64215	-0.662586	0.0712083	0.515516	623.96	74.92	7.24
BMS-754807	MOLT-16	0.597063	0.293871	1.81678	1.34161	26.15	50.78	0.738
BMS-754807	NCI-H747	1.63739	1.02096	5.14172	2.77586	46.01	37.65	0.54
BMS-754807	P31-FUJ	0.24427	-0.0912594	1.27669	0.912781	28.5	137.36	0.715
BMS-754807	SW48	-2.17089	-0.28867	0.114075	0.749259	556.81	86.7	6.568
BMS-754807	T84	1.49175	1.02587	4.44486	2.78951	37.24	31.23	0.628
BMS-754807	YH-13	1.88629	0.559076	6.59486	1.74906	73.48	70.36	0.265
BMS-754807	CHP-126	1.50651	0.609809	4.51098	1.84008	59.21	59.52	0.408
BMS-754807	A704	1.63044	1.08024	5.10612	2.94539	42.32	33.75	0.577
BMS-754807	HCC-366	1.3224	1.02414	3.75242	2.78469	25.79	22.55	0.742
BMS-754807	NCI-H647	2.04053	0.586915	7.6947	1.79843	76.63	71.24	0.234
BMS-754807	TOV-21G	1.49534	1.49486	4.46087	4.45873	0.05	0.03	1
BMS-754807	DAN-G	1.0068	1.07227	2.73682	2.922	6.77	6.5	1.068
BMS-754807	AMO-1	-0.997734	-0.59168	0.368714	0.553397	50.09	40.7	1.501
BMS-754807	NCI-H1781	1.36208	0.595196	3.90429	1.81339	53.55	56.3	0.464
BMS-754807	VCaP	0.508045	1.02511	1.66204	2.78741	67.71	101.78	1.677
BMS-754807	NCI-H1876	-0.357854	0.051232	0.699175	1.05257	50.54	114.32	1.505
BMS-754807	PL-21	-0.294603	0.348918	0.744827	1.41753	90.32	218.44	1.903
BMS-754807	SU-DHL-4	0.65046	0.52629	1.91642	1.69264	11.68	19.09	0.883
BMS-754807	WSU-DLCL2	0.593216	0.202303	1.8098	1.22422	32.36	65.9	0.676
BMS-754807	SNU-1040	1.93232	0.132224	6.90551	1.14136	83.47	93.16	0.165
Bosutinib	DOHH-2	-0.791665	-1.20802	0.45309	0.298789	34.06	52.59	0.659
Bosutinib	P31-FUJ	0.396076	-1.11745	1.48598	0.327114	77.99	382.13	0.22
Bosutinib	PF-382	-0.268688	-0.614943	0.764382	0.540672	29.27	128.87	0.707
Bosutinib	BFTC-905	0.164293	-1.04074	1.17856	0.353193	70.03	733.47	0.3
Bosutinib	A4-Fuk	0.272869	-1.90562	1.31373	0.148731	88.68	798.36	0.113
Bosutinib	A3-KAW	-0.333418	-1.13844	0.716471	0.320319	55.29	241.44	0.447
Bosutinib	OCI-AML2	0.193608	-1.75514	1.21362	0.172884	85.75	1006.54	0.142
Bosutinib	CAL-54	-0.198133	-0.616468	0.820261	0.539848	34.19	211.14	0.658
Bosutinib	ALL-SIL	-3.80847	-1.12774	0.022182	0.323765	1359.58	70.39	14.596
Bosutinib	LOU-NH91	0.39609	-0.399973	1.486	0.670338	54.89	200.98	0.451
Bosutinib	KCL-22	-2.82307	-0.852717	0.0594234	0.426255	617.32	69.79	7.173
Bosutinib	NU-DUL-1	-0.0012648	-0.118334	0.998736	0.8884	11.05	9255.91	0.89
Bromosporine	HL-60	0.197511	-0.0002552	1.21837	0.999745	17.94	100.13	0.821
Bromosporine	Daudi	0.564735	0.751738	1.75898	2.12068	20.56	33.11	1.206
Bromosporine	KARPAS-422	0.564174	-0.0536328	1.758	0.94778	46.09	109.51	0.539
Bromosporine	KU812	0.680962	-0.107473	1.97578	0.898101	54.54	115.78	0.455
Bromosporine	MDA-MB-453	0.21914	-0.01781	1.24501	0.982348	21.1	108.13	0.789
Bromosporine	NAMALWA	-0.366017	0.163089	0.693491	1.17714	69.74	144.56	1.697
Bromosporine	A3-KAW	-0.270552	-0.340725	0.762958	0.711255	6.78	25.94	0.932
Bromosporine	KYM-1	0.440533	0.160274	1.55354	1.17383	24.44	63.62	0.756
Bromosporine	SU-DHL-5	0.138041	-0.184848	1.14802	0.83123	27.59	233.91	0.724
Buparlisib	8-MG-BA	0.007868	0.0314212	1.0079	1.03192	2.38	299.35	1.024
Buparlisib	NCI-H1648	-0.268744	0.961576	0.764339	2.61582	242.23	457.8	3.422
Buparlisib	HCC1599	0.783546	0.664098	2.18922	1.94274	11.26	15.24	0.887
Buparlisib	HCC1937	2.20762	1.87032	9.09404	6.49036	28.63	15.28	0.714
Buparlisib	TE-1	0.949571	0.479975	2.5846	1.61603	37.47	49.45	0.625
Buparlisib	NCI-H522	1.64774	1.0252	5.19523	2.78764	46.34	37.78	0.537
Buparlisib	ACHN	1.05565	1.19433	2.87384	3.30134	14.88	13.14	1.149
Buparlisib	BT-549	1.56518	1.17845	4.78356	3.24934	32.07	24.71	0.679
Buparlisib	Hs-578-T	0.431344	0.717442	1.53932	2.04918	33.12	66.33	1.331
Buparlisib	SK-OV-3	1.78318	0.782046	5.94876	2.18594	63.25	56.14	0.367
Buparlisib	SW620	1.49137	0.997999	4.44317	2.71285	38.94	33.08	0.611
Buparlisib	SF295	1.55064	0.486082	4.71448	1.62593	65.51	68.65	0.345
Buparlisib	SF268	1.4812	1.39538	4.39821	4.03651	8.22	5.79	0.918
Buparlisib	647-V	1.1196	1.0848	3.06363	2.95885	3.42	3.11	0.966
Buparlisib	CAL-120	1.39078	0.406174	4.01797	1.50106	62.64	70.8	0.374
Buparlisib	C32	1.90422	1.40601	6.71415	4.07963	39.24	26.16	0.608
Buparlisib	GAMG	1.0265	0.685978	2.79128	1.98571	28.86	33.17	0.711
Buparlisib	JVM-3	-0.516843	0.27328	0.5964	1.31427	120.37	152.87	2.204
Buparlisib	KARPAS-422	0.909776	0.502544	2.48377	1.65292	33.45	44.76	0.665
Buparlisib	LP-1	1.10466	1.35221	3.01819	3.86595	28.09	22.41	1.281
Buparlisib	LS-411N	1.56288	1.176	4.77256	3.24137	32.08	24.75	0.679
Buparlisib	MDA-MB-361	0.171592	1.04895	1.18719	2.85464	140.45	511.3	2.405
Buparlisib	MDA-MB-453	0.829493	0.800077	2.29216	2.22571	2.9	3.55	0.971
Buparlisib	MKN1	0.863082	0.818414	2.37046	2.2669	4.37	5.18	0.956
Buparlisib	MOLT-16	0.538488	-0.0454474	1.71341	0.95557	44.23	108.44	0.558
Buparlisib	NCI-H716	1.4993	0.937295	4.47855	2.55307	42.99	37.48	0.57
Buparlisib	ONS-76	2.09592	0.633018	8.1329	1.88329	76.84	69.8	0.232
Buparlisib	PF-382	0.659774	0.48314	1.93436	1.62116	16.19	26.77	0.838
Buparlisib	RMG-I	1.89492	1.33292	6.65203	3.79211	42.99	29.66	0.57
Buparlisib	RPMI-8402	-1.18533	-0.131387	0.305647	0.876879	186.89	88.92	2.869
Buparlisib	RT-112	0.974484	1.22889	2.6498	3.41743	28.97	26.11	1.29
Buparlisib	SK-HEP-1	1.4001	1.10839	4.0556	3.02949	25.3	20.83	0.747
Buparlisib	SK-MEL-3	1.54819	0.803224	4.70293	2.23273	52.52	48.12	0.475
Buparlisib	SK-MES-1	1.73438	1.14905	5.6654	3.15518	44.31	33.75	0.557
Buparlisib	TGBC11TKB	1.13761	1.20994	3.11931	3.35328	7.5	6.36	1.075
Buparlisib	U-2-OS	1.61634	1.10103	5.03462	3.00726	40.27	31.88	0.597
Buparlisib	UACC-893	1.22946	-0.33051	3.41937	0.718557	78.99	126.88	0.21
Buparlisib	WM-115	1.61416	0.719792	5.02368	2.05401	59.11	55.41	0.409
Buparlisib	COLO-684	1.09845	0.979087	2.99953	2.66203	11.25	10.87	0.887
Buparlisib	BFTC-909	-0.338213	0.155647	0.713044	1.16841	63.86	146.02	1.639
Buparlisib	CA46	0.673239	0.943284	1.96058	2.5684	31	40.11	1.31
Buparlisib	NCI-H146	1.76456	0.733169	5.83902	2.08167	64.35	58.45	0.357
Buparlisib	SCC-4	1.56682	1.1381	4.7914	3.12083	34.87	27.36	0.651
Buparlisib	AM-38	0.88658	0.667354	2.42682	1.94907	19.69	24.73	0.803
Buparlisib	BT-474	2.1682	1.44874	8.74252	4.25775	51.3	33.18	0.487
Buparlisib	LCLC-97TM1	1.20654	1.4209	3.34192	4.14083	23.91	17.77	1.239
Buparlisib	EN	1.13657	0.971444	3.11605	2.64176	15.22	14.53	0.848
Buparlisib	HCC-366	2.22399	1.44749	9.24414	4.25242	54	34.91	0.46
Buparlisib	HCC-44	0.444828	0.638624	1.56022	1.89387	21.38	43.57	1.214
Buparlisib	IGR-37	0.980089	1.02397	2.66469	2.78422	4.49	4.48	1.045
Buparlisib	KYM-1	-0.162805	0.3211	0.849757	1.37864	62.24	297.23	1.622
Buparlisib	NCI-H2023	0.627382	0.475677	1.8727	1.6091	14.08	24.18	0.859
Buparlisib	OVISE	0.935881	0.43312	2.54946	1.54206	39.51	53.72	0.605
Buparlisib	PA-TU-8988T	0.775683	0.663648	2.17208	1.94186	10.6	14.44	0.894
Buparlisib	PE-CA-PJ15	1.77871	0.799592	5.9222	2.22463	62.44	55.05	0.376
Buparlisib	OCI-AML3	0.133522	0.175024	1.14285	1.19127	4.24	31.08	1.042
Buparlisib	CL-11	1.82265	1.32079	6.18823	3.74638	39.46	27.53	0.605
Buparlisib	EFM-192A	0.509843	0.938461	1.66503	2.55604	53.51	84.07	1.535
Buparlisib	HDQ-P1	0.253531	0.396258	1.28857	1.48625	15.34	56.3	1.153
Buparlisib	EJM	1.7103	0.943844	5.53063	2.56984	53.53	44.81	0.465
Buparlisib	LOU-NH91	1.09512	0.283911	2.98953	1.32831	55.57	74.07	0.444
Buparlisib	JM1	1.25519	0.664516	3.50849	1.94355	44.6	47.06	0.554
Buparlisib	KCL-22	0.286183	0.504879	1.33134	1.65678	24.45	76.42	1.244
Buparlisib	MOLM-13	-0.393252	-1.04347	0.674859	0.352231	47.81	165.34	0.522
Buparlisib	MOLM-16	-0.433512	-0.0316704	0.648229	0.968826	49.46	92.69	1.495
Buparlisib	MOLP-8	0.405732	0.298635	1.5004	1.34802	10.16	26.4	0.898
Buparlisib	NCI-H1341	1.82767	0.584525	6.21935	1.79414	71.15	68.02	0.288
Buparlisib	PL-21	0.942832	0.41889	2.56724	1.52027	40.78	55.57	0.592
Buparlisib	WSU-DLCL2	0.103253	0.202736	1.10877	1.22475	10.46	96.35	1.105
Buparlisib	KMS-11	0.093364	0.104641	1.09786	1.11031	1.13	12.08	1.011
Buparlisib	SNU-61	2.0596	1.46592	7.84285	4.33153	44.77	28.83	0.552
Buparlisib	SNU-81	1.60735	1.13743	4.9896	3.11874	37.5	29.24	0.625
Buparlisib	SNU-C5	0.564466	0.549242	1.75851	1.73194	1.51	2.7	0.985
Camptothecin	SK-ES-1	-5.14302	-4.10486	0.00584004	0.0164923	182.4	20.19	2.824
Camptothecin	RT4	-2.96287	-3.23711	0.0516702	0.0392773	23.98	9.26	0.76
Camptothecin	TCCSUP	-2.3492	-1.77081	0.0954455	0.170195	78.32	24.62	1.783
Camptothecin	SK-N-DZ	-3.70315	-3.49607	0.0246458	0.0303163	23.01	5.59	1.23
Camptothecin	NCI-H650	-2.65868	-1.90234	0.0700403	0.149219	113.05	28.45	2.13
Camptothecin	NCI-H929	-3.51609	-3.233	0.0297154	0.0394391	32.72	8.05	1.327
Camptothecin	HCC1599	-3.24691	-3.29538	0.038894	0.0370538	4.73	1.49	0.953
Camptothecin	HSC-2	-4.33608	-3.2282	0.0130878	0.0396289	202.79	25.55	3.028
Camptothecin	J82	-3.04412	-2.66594	0.0476381	0.0695337	45.96	12.42	1.46
Camptothecin	RPMI-8226	-3.96344	-3.42922	0.0189976	0.0324121	70.61	13.48	1.706
Camptothecin	UACC-62	-3.45489	-1.93631	0.0315907	0.144235	356.57	43.95	4.566
Camptothecin	OVCAR-8	-3.18246	-2.98633	0.0414835	0.0504726	21.67	6.16	1.217
Camptothecin	ABC-1	-2.38742	-3.08565	0.0918661	0.0457004	50.25	29.25	0.497
Camptothecin	647-V	-4.578	-3.72	0.0102754	0.0242339	135.84	18.74	2.358
Camptothecin	CFPAC-1	-3.52121	-2.50711	0.0295635	0.0815035	175.69	28.8	2.757
Camptothecin	DU-4475	-4.32821	-4.05916	0.0131911	0.0172635	30.87	6.22	1.309
Camptothecin	ECC10	-3.05892	-2.32461	0.0469386	0.0978221	108.4	24.01	2.084
Camptothecin	FADU	-4.02616	-3.41364	0.0178427	0.032921	84.51	15.21	1.845
Camptothecin	GAMG	-2.39252	-2.90144	0.0913988	0.0549441	39.89	21.27	0.601
Camptothecin	GCT	-2.93363	-2.7451	0.0532038	0.0642417	20.75	6.43	1.207
Camptothecin	HOS	-2.75345	-3.45946	0.0637078	0.0314468	50.64	25.64	0.494
Camptothecin	KU-19-19	-3.41691	-2.77094	0.0328136	0.0626028	90.78	18.9	1.908
Camptothecin	KP-N-YN	-2.62222	-2.39452	0.0726412	0.0912163	25.57	8.68	1.256
Camptothecin	KYSE-510	-2.57385	-2.62465	0.0762418	0.0724653	4.95	1.97	0.95
Camptothecin	L-428	-3.45107	-3.31776	0.0317117	0.0362339	14.26	3.86	1.143
Camptothecin	L-540	-4.83086	-4.08842	0.00797969	0.0167657	110.1	15.37	2.101
Camptothecin	MDA-MB-468	-2.5123	-3.0536	0.0810815	0.0471886	41.8	21.55	0.582
Camptothecin	MES-SA	-2.92841	-2.38856	0.0534821	0.0917617	71.57	18.43	1.716
Camptothecin	MHH-CALL-2	-4.89601	-3.8022	0.00747638	0.0223216	198.56	22.34	2.986
Camptothecin	NCI-H1105	-4.79424	-1.61784	0.0082773	0.198326	2296.02	66.25	23.96
Camptothecin	P31-FUJ	-3.40397	-3.15495	0.0332412	0.0426406	28.28	7.32	1.283
Camptothecin	Saos-2	-2.90246	-2.9223	0.0548879	0.0538097	1.96	0.68	0.98
Camptothecin	SU-DHL-1	-4.21584	-4.34141	0.01476	0.0130181	11.8	2.98	0.882
Camptothecin	SW48	-3.64499	-3.55206	0.0261218	0.0286654	9.74	2.55	1.097
Camptothecin	TYK-nu	-3.6812	-3.66793	0.0251928	0.0255293	1.34	0.36	1.013
Camptothecin	CHP-126	-4.26927	-3.42031	0.013992	0.0327023	133.72	19.89	2.337
Camptothecin	CAL-27	-3.74086	-3.06781	0.0237336	0.046523	96.02	17.99	1.96
Camptothecin	A101D	-2.76217	-2.9772	0.0631547	0.0509353	19.35	7.78	0.807
Camptothecin	CAL-51	-3.28995	-3.19746	0.0372556	0.0408659	9.69	2.81	1.097
Camptothecin	RERF-LC-MS	-3.84748	-2.99125	0.0213335	0.0502245	135.43	22.25	2.354
Camptothecin	OCI-AML2	-4.90703	-4.5185	0.0073944	0.0109054	47.48	7.92	1.475
Camptothecin	Jurkat	-4.34643	-4.02669	0.012953	0.0178333	37.68	7.36	1.377
Camptothecin	Hs-683	-4.14516	-2.86675	0.0158409	0.0568832	259.09	30.84	3.591
Camptothecin	ML-1	-2.71578	-2.33077	0.0661533	0.0972212	46.96	14.18	1.47
Camptothecin	SUIT-2	-2.7666	-2.13015	0.0628755	0.11882	88.98	23	1.89
Camptothecin	SUP-B15	-5.02201	-4.9232	0.00659129	0.00727578	10.38	1.97	1.104
Camptothecin	HCC-78	-4.1673	-4.21877	0.0154941	0.0147167	5.02	1.24	0.95
Camptothecin	KMRC-20	-2.91559	-2.11661	0.0541723	0.12044	122.33	27.4	2.223
Camptothecin	GA-10	-3.21345	-3.94882	0.0402176	0.0192774	52.07	22.88	0.479
Camptothecin	JEKO-1	-4.22473	-3.90487	0.0146292	0.0201435	37.69	7.57	1.377
Camptothecin	MOLM-13	-4.89006	-4.86533	0.00752101	0.00770932	2.5	0.51	1.025
Camptothecin	NCI-H1876	-5.81512	-4.22431	0.00298212	0.0146355	390.77	27.36	4.908
Camptothecin	NU-DUL-1	-4.79434	-4.17818	0.00827642	0.0153264	85.18	12.85	1.852
Camptothecin	SNU-C5	-2.42072	-2.94804	0.0888577	0.0524425	40.98	21.78	0.59
CCT-018159	MOLM-16	0.96466	1.56579	2.6239	4.78647	82.42	62.32	1.824
CCT-018159	KMS-11	2.16417	1.4134	8.70738	4.10991	52.8	34.69	0.472
Cediranib	SW780	1.19395	1.82424	3.30008	6.19808	87.82	52.79	1.878
Cediranib	TCCSUP	2.03657	1.40163	7.66424	4.0618	47	31.18	0.53
Cediranib	U-118-MG	2.17542	1.50153	8.80586	4.48856	49.03	30.98	0.51
Cediranib	DMS-273	1.59329	0.990122	4.91992	2.69156	45.29	37.86	0.547
Cediranib	SK-N-SH	1.42159	1.46532	4.1437	4.32892	4.47	3.08	1.045
Cediranib	T47D	1.69534	1.41237	5.44852	4.10567	24.65	16.69	0.754
Cediranib	BT-549	1.76835	1.46918	5.86117	4.34566	25.86	16.92	0.741
Cediranib	OVCAR-8	2.21627	1.60301	9.17303	4.96798	45.84	27.67	0.542
Cediranib	A2058	1.7745	1.53974	5.89736	4.66337	20.92	13.23	0.791
Cediranib	COR-L105	0.45878	0.379716	1.58214	1.46187	7.6	17.23	0.924
Cediranib	DB	0.871312	1.52788	2.39004	4.60839	92.82	75.35	1.928
Cediranib	HCC1806	1.12233	1.52413	3.072	4.59113	49.45	35.8	1.495
Cediranib	HGC-27	1.55675	1.58439	4.74337	4.87633	2.8	1.78	1.028
Cediranib	HOS	1.78044	1.63724	5.93245	5.14098	13.34	8.04	0.867
Cediranib	HSC-4	1.95593	1.81449	7.07049	6.13797	13.19	7.23	0.868
Cediranib	HuH-7	1.74868	1.79935	5.74702	6.0457	5.2	2.9	1.052
Cediranib	KALS-1	2.03054	1.31474	7.61821	3.72378	51.12	35.25	0.489
Cediranib	MDA-MB-468	1.88939	1.45617	6.61531	4.28952	35.16	22.93	0.648
Cediranib	MOLT-16	1.77048	1.14298	5.8737	3.13611	46.61	35.44	0.534
Cediranib	MONO-MAC-6	0.72432	1.49259	2.06333	4.44862	115.6	106.07	2.156
Cediranib	NCI-H358	2.24607	1.69291	9.45051	5.4353	42.49	24.63	0.575
Cediranib	OS-RC-2	2.15564	1.65946	8.63337	5.25647	39.11	23.02	0.609
Cediranib	PF-382	1.86321	1.35214	6.4444	3.8657	40.01	27.43	0.6
Cediranib	SK-MEL-30	1.67768	1.93793	5.35312	6.94436	29.73	15.51	1.297
Cediranib	OE33	1.78692	1.5515	5.97106	4.71854	20.98	13.17	0.79
Cediranib	BFTC-905	1.58	1.42548	4.85493	4.15987	14.32	9.78	0.857
Cediranib	A4-Fuk	1.05593	1.23244	2.87464	3.42959	19.3	16.72	1.193
Cediranib	CML-T1	0.429045	1.17674	1.53579	3.24377	111.21	174.27	2.112
Cediranib	TE-441-T	1.96053	1.5625	7.1031	4.77075	32.84	20.3	0.672
Cediranib	TE-11	1.41615	1.26188	4.12121	3.53205	14.3	10.89	0.857
Cediranib	Caov-4	0.845488	1.69854	2.32911	5.46596	134.68	100.89	2.347
Cediranib	BICR22	2.06845	1.65389	7.91252	5.22729	33.94	20.04	0.661
Cediranib	CCK-81	0.986153	0.309867	2.6809	1.36324	49.15	68.58	0.509
Cediranib	Hep3B2-1-7	0.331613	1.73142	1.39321	5.64868	305.44	422.12	4.054
Cediranib	OVISE	1.93653	1.28366	6.93465	3.60981	47.95	33.71	0.521
Cediranib	PA-TU-8988T	2.24853	1.6651	9.4738	5.28618	44.2	25.95	0.558
Cediranib	HDQ-P1	1.71135	1.12773	5.53644	3.08865	44.21	34.1	0.558
Cediranib	PANC-02-03	1.89127	2.18375	6.62777	8.87952	33.97	15.46	1.34
Cediranib	RCH-ACV	1.76795	1.37173	5.85882	3.94216	32.71	22.41	0.673
Cediranib	SU-DHL-6	1.36011	1.0591	3.89662	2.88377	25.99	22.13	0.74
Cediranib	KMS-11	0.624406	1.31515	1.86714	3.7253	99.52	110.62	1.995
CHIR-99021	HT-115	1.76338	0.82325	5.83212	2.27789	60.94	53.31	0.391
CHIR-99021	SIG-M5	1.83647	0.464056	6.27433	1.59051	74.65	74.73	0.253
CHIR-99021	RL	2.16989	0.614473	8.75729	1.84868	78.89	71.68	0.211
CHIR-99021	JM1	1.8213	1.13592	6.17991	3.11402	49.61	37.63	0.504
CHIR-99021	RCH-ACV	1.04799	0.581554	2.85192	1.78882	37.28	44.51	0.627
Crizotinib	NCI-H2170	1.4719	0.964851	4.35751	2.6244	39.77	34.45	0.602
Crizotinib	NCI-H2030	2.23814	1.62959	9.37584	5.10179	45.59	27.19	0.544
Crizotinib	LU-65	1.62295	1.64973	5.06803	5.2056	2.71	1.65	1.027
Crizotinib	TE-10	2.19006	1.84111	8.93575	6.30353	29.46	15.93	0.705
Crizotinib	HCT-116	1.13213	1.51227	3.10225	4.537	46.25	33.58	1.462
Crizotinib	RPMI-8226	2.27425	1.33217	9.72061	3.78925	61.02	41.42	0.39
Crizotinib	Becker	2.07093	1.44962	7.93221	4.26149	46.28	30	0.537
Crizotinib	A2780	0.91078	1.15052	2.48626	3.15984	27.09	26.32	1.271
Crizotinib	EM-2	-0.217621	0.720321	0.80443	2.05509	155.47	431	2.555
Crizotinib	KP-N-YN	2.26105	1.2927	9.59314	3.64261	62.03	42.83	0.38
Crizotinib	LAMA-84	-0.559593	0.973236	0.571442	2.64649	363.13	273.92	4.631
Crizotinib	LS-411N	2.06372	1.39617	7.87523	4.03968	48.7	32.35	0.513
Crizotinib	LS-513	1.27769	0.887315	3.58832	2.4286	32.32	30.55	0.677
Crizotinib	NALM-6	-0.281366	1.02494	0.754752	2.78693	269.25	464.27	3.693
Crizotinib	P31-FUJ	0.162014	0.505634	1.17588	1.65804	41	212.09	1.41
Crizotinib	PF-382	1.07434	1.25066	2.92805	3.49264	19.28	16.41	1.193
Crizotinib	SKM-1	0.81715	1.1257	2.26404	3.08236	36.14	37.76	1.361
Crizotinib	SNU-C1	1.82656	1.48842	6.21248	4.4301	28.69	18.51	0.713
Crizotinib	BFTC-905	1.19708	1.09105	3.31045	2.9774	10.06	8.86	0.899
Crizotinib	RERF-LC-MS	0.32722	1.30734	1.38711	3.69633	166.48	299.53	2.665
Crizotinib	L-363	1.58676	0.679591	4.8879	1.97307	59.63	57.17	0.404
Crizotinib	Jurkat	1.95544	0.538119	7.06699	1.71278	75.76	72.48	0.242
Crizotinib	KCL-22	0.348171	0.910543	1.41647	2.48567	75.48	161.52	1.755
Crizotinib	NCI-H1876	1.72371	1.2793	5.60528	3.59411	35.88	25.78	0.641
Crizotinib	SU-DHL-4	1.85887	1.05259	6.41651	2.86507	55.35	43.37	0.447
Crizotinib	KMS-11	1.13434	0.231256	3.10912	1.26018	59.47	79.61	0.405
Crizotinib	SNU-1040	2.17961	1.05336	8.84282	2.86727	67.58	51.67	0.324
Cytarabine	8-MG-BA	-0.455754	-1.04517	0.63397	0.351633	44.53	129.33	0.555
Cytarabine	NCI-H1623	-0.965326	-1.68361	0.380859	0.185703	51.24	74.41	0.488
Cytarabine	SBC-5	0.155014	-0.56278	1.16767	0.569623	51.22	463.05	0.488
Cytarabine	LXF-289	0.37791	-0.433387	1.45923	0.648309	55.57	214.68	0.444
Cytarabine	GDM-1	-1.93427	-0.132924	0.144529	0.875531	505.78	93.13	6.058
Cytarabine	LAMA-84	-2.65555	-2.85995	0.0702605	0.0572718	18.49	7.7	0.815
Cytarabine	MOLT-16	-3.69928	-2.90734	0.0247414	0.0546209	120.77	21.41	2.208
Cytarabine	NAMALWA	-3.07011	-1.92703	0.0464158	0.145579	213.64	37.23	3.136
Cytarabine	P12-ICHIKAWA	-4.27919	-2.42981	0.0138538	0.0880533	535.59	43.22	6.356
Cytarabine	Raji	-1.31393	-1.36918	0.268761	0.254316	5.37	4.2	0.946
Cytarabine	RKO	-0.617396	-0.609269	0.539347	0.543748	0.82	1.32	1.008
Cytarabine	SK-UT-1	-0.697808	-1.28303	0.497675	0.277196	44.3	83.87	0.557
Cytarabine	PSN1	-0.17674	-0.557323	0.837998	0.57274	31.65	215.33	0.683
Cytarabine	BL-41	-0.433832	-2.93711	0.648021	0.0530189	91.82	577.01	0.082
Cytarabine	ST486	-1.17081	-0.766915	0.310117	0.464444	49.76	34.5	1.498
Cytarabine	BFTC-905	-1.12127	-0.481851	0.325864	0.617639	89.54	57.03	1.895
Cytarabine	A3-KAW	-1.7203	-2.4187	0.179013	0.089037	50.26	40.6	0.497
Cytarabine	BICR22	0.668028	-2.20365	1.95039	0.1104	94.34	429.87	0.057
Cytarabine	PA-TU-8988T	0.600084	0.105333	1.82227	1.11108	39.03	82.45	0.61
Cytarabine	DAN-G	0.383685	-0.355284	1.46768	0.700974	52.24	192.6	0.478
Cytarabine	TOV-112D	-0.668768	-1.21397	0.512339	0.297016	42.03	81.52	0.58
Cytarabine	KOPN-8	-3.38658	-2.56398	0.0338243	0.0769974	127.64	24.29	2.276
Cytarabine	ME-1	0.418454	0.384383	1.51961	1.46871	3.35	8.14	0.967
Cytarabine	SU-DHL-6	-0.156346	-2.03015	0.855263	0.131316	84.65	1198.5	0.154
Dabrafenib	SK-MEL-5	1.92162	0.630791	6.832	1.8791	72.5	67.17	0.275
Dabrafenib	UACC-62	-3.07716	-3.69119	0.0460898	0.0249422	45.88	19.95	0.541
Dabrafenib	UACC-257	-0.036295	-1.72695	0.964356	0.177827	81.56	4658.08	0.184
Dabrafenib	DB	2.09555	1.23669	8.12989	3.44418	57.64	40.99	0.424
Dabrafenib	DBTRG-05MG	1.8046	1.09652	6.07756	2.99374	50.74	39.24	0.493
Dabrafenib	IGR-1	1.99691	1.30692	7.36624	3.69476	49.84	34.55	0.502
Dabrafenib	IPC-298	2.26456	-4.33589	9.62693	0.0130903	99.86	291.47	0.001
Dabrafenib	L-540	1.87414	1.14237	6.51524	3.13419	51.89	39.05	0.481
Dabrafenib	MEL-HO	-2.61838	-2.0425	0.0729206	0.129703	77.87	21.99	1.779
Dabrafenib	CML-T1	2.01293	1.53188	7.48523	4.62689	38.19	23.9	0.618
Dabrafenib	OV-90	-0.203333	0.642744	0.816006	1.90169	133.05	416.1	2.33
Dabrafenib	SU-DHL-6	1.19259	-1.90481	3.29561	0.148851	95.48	259.72	0.045
Dactolisib	RT4	-2.5635	-2.04229	0.0770346	0.129731	68.41	20.33	1.684
Dactolisib	8-MG-BA	-3.06556	-2.72521	0.0466275	0.0655324	40.54	11.1	1.405
Dactolisib	U-118-MG	-1.94243	-2.34483	0.143355	0.0958637	33.13	20.72	0.669
Dactolisib	Calu-6	-1.81731	-2.18597	0.162462	0.112369	30.83	20.29	0.692
Dactolisib	HCC1143	-2.69696	-2.24591	0.06741	0.105831	57	16.72	1.57
Dactolisib	BEN	-2.89637	-2.17021	0.0552234	0.114154	106.71	25.07	2.067
Dactolisib	TE-10	-2.01624	-2.56368	0.133155	0.0770207	42.16	27.15	0.578
Dactolisib	SK-MEL-28	-2.93679	-2.96041	0.0530357	0.0517975	2.33	0.8	0.977
Dactolisib	SW620	-1.48717	-2.16752	0.226012	0.114461	49.36	45.75	0.506
Dactolisib	HOP-62	-1.44355	-1.96323	0.236089	0.140405	40.53	36	0.595
Dactolisib	UACC-62	-1.98202	-2.26774	0.137791	0.103545	24.85	14.42	0.751
Dactolisib	SF295	-2.52835	-2.38384	0.0797902	0.0921954	15.55	5.72	1.155
Dactolisib	BxPC-3	-1.55356	-1.97878	0.211494	0.138238	34.64	27.37	0.654
Dactolisib	BT-20	-1.45936	-2.30717	0.232385	0.0995422	57.17	58.1	0.428
Dactolisib	FTC-133	-2.01837	-2.16774	0.132873	0.114436	13.88	7.4	0.861
Dactolisib	KARPAS-422	-2.64199	-2.47179	0.0712195	0.0844335	18.55	6.44	1.186
Dactolisib	MOLT-16	-2.63938	-2.79188	0.0714055	0.0613058	14.14	5.78	0.859
Dactolisib	MONO-MAC-6	-3.14532	-3.48121	0.0430531	0.0307702	28.53	10.68	0.715
Dactolisib	NAMALWA	-3.04472	-2.98302	0.0476097	0.0506398	6.36	2.03	1.064
Dactolisib	NCI-H2452	-3.4264	-3.28098	0.0325036	0.0375914	15.65	4.24	1.157
Dactolisib	NCI-H1793	-2.47344	-1.13588	0.0842943	0.321139	280.97	54.08	3.81
Dactolisib	P12-ICHIKAWA	-2.83342	-2.77117	0.0588111	0.0625886	6.42	2.2	1.064
Dactolisib	REH	-1.40242	-2.2521	0.246	0.105179	57.24	60.59	0.428
Dactolisib	SIG-M5	-2.13196	-2.52706	0.118605	0.0798938	32.64	18.53	0.674
Dactolisib	SJSA-1	-2.1098	-2.46002	0.121262	0.0854331	29.55	16.6	0.705
Dactolisib	SK-MEL-3	-1.41267	-1.80628	0.243492	0.164264	32.54	27.86	0.675
Dactolisib	SNU-423	-1.68546	-2.13399	0.185359	0.118364	36.14	26.61	0.639
Dactolisib	UACC-893	-2.40645	-2.25964	0.0901348	0.104388	15.81	6.1	1.158
Dactolisib	YH-13	-2.75459	-2.14857	0.063635	0.116651	83.31	22	1.833
Dactolisib	C2BBe1	-2.52962	-1.28136	0.0796891	0.277659	248.43	49.35	3.484
Dactolisib	CA46	-2.0742	-2.06997	0.125657	0.12619	0.42	0.2	1.004
Dactolisib	A101D	-3.34547	-2.28091	0.0352436	0.102191	189.96	31.82	2.9
Dactolisib	RERF-LC-MS	-2.64289	-2.13535	0.0711553	0.118203	66.12	19.2	1.661
Dactolisib	A4-Fuk	-3.43214	-2.79447	0.0323176	0.0611475	89.21	18.58	1.892
Dactolisib	OCI-AML2	-1.59617	-3.14345	0.202672	0.0431338	78.72	96.94	0.213
Dactolisib	CAL-54	-2.85581	-2.51386	0.0575093	0.0809551	40.77	11.97	1.408
Dactolisib	BCPAP	-1.75485	-2.63474	0.172934	0.0717376	58.52	50.14	0.415
Dactolisib	NCI-H1975	-2.77391	-2.41289	0.0624176	0.089556	43.48	13.01	1.435
Dactolisib	PANC-10-05	-1.62606	-1.38268	0.196703	0.250904	27.55	14.97	1.276
Dactolisib	TE-11	-1.75062	-2.72181	0.173665	0.0657556	62.14	55.48	0.379
Dactolisib	ES-2	-1.52192	-1.76606	0.218293	0.171005	21.66	16.04	0.783
Dactolisib	Hs-683	-2.04939	-2.89369	0.128813	0.0553716	57.01	41.2	0.43
Dactolisib	MDST8	-3.4315	-1.86984	0.0323385	0.154149	376.67	45.51	4.767
Dactolisib	NCI-H211	-2.23043	-2.89809	0.107482	0.0551285	48.71	29.93	0.513
Dactolisib	NCI-H647	-2.63689	-2.87053	0.0715834	0.0566686	20.84	8.86	0.792
Dactolisib	NCI-H841	-1.64126	-2.44667	0.193736	0.0865815	55.31	49.07	0.447
Dactolisib	PA-TU-8988T	-2.72747	-2.98419	0.0653845	0.0505802	22.64	9.41	0.774
Dactolisib	PE-CA-PJ15	-1.75012	-2.07701	0.173754	0.125304	27.88	18.68	0.721
Dactolisib	CAL-29	-2.63264	-2.72189	0.0718883	0.0657507	8.54	3.39	0.915
Dactolisib	EFM-192A	-1.9414	-2.38702	0.143502	0.091903	35.96	22.95	0.64
Dactolisib	KCL-22	-3.2022	-1.95536	0.0406728	0.141514	247.93	38.94	3.479
Dactolisib	NCI-H1876	-1.85034	-3.16829	0.157184	0.0420756	73.23	71.23	0.268
Dactolisib	SU-DHL-10	-3.93265	-2.7833	0.0195916	0.0618339	215.61	29.23	3.156
Dactolisib	OV-7	-2.35161	-2.72374	0.0952161	0.0656288	31.07	15.82	0.689
Daporinad	NCI-H2085	-4.27251	-3.91971	0.0139468	0.0198469	42.3	8.26	1.423
Daporinad	DMS-114	-6.63337	-4.71234	0.00131572	0.0089837	582.8	28.96	6.828
Daporinad	SK-N-FI	-4.61707	-4.53584	0.00988175	0.0107179	8.46	1.76	1.085
Daporinad	SK-N-SH	-5.07096	-5.37968	0.0062764	0.00460929	26.56	6.09	0.734
Daporinad	NCI-H2030	-4.35173	-2.57671	0.0128845	0.0760241	490.04	40.79	5.9
Daporinad	NCI-H2087	-1.90664	-3.45871	0.148579	0.0314702	78.82	81.4	0.212
Daporinad	NCI-H2009	-3.07816	-4.55912	0.0460441	0.0104712	77.26	48.11	0.227
Daporinad	UACC-62	-1.21035	-3.34865	0.298093	0.0351316	88.21	176.67	0.118
Daporinad	8305C	-3.94827	-3.69621	0.0192881	0.0248174	28.67	6.38	1.287
Daporinad	COR-L88	-3.37798	-3.53398	0.0341164	0.0291885	14.44	4.62	0.856
Daporinad	COLO-800	-3.54367	-3.9329	0.0289072	0.0195869	32.24	10.98	0.678
Daporinad	D-283MED	-7.55356	-5.10774	0.000524241	0.00604971	1053.99	32.38	11.54
Daporinad	GAMG	-4.77802	-4.64639	0.00841263	0.0095962	14.07	2.75	1.141
Daporinad	HH	-5.40016	-4.00586	0.00451585	0.0182087	303.22	25.82	4.032
Daporinad	JVM-3	-5.60278	-5.75354	0.0036876	0.00317155	13.99	2.69	0.86
Daporinad	KU812	-6.23026	-5.39517	0.00196895	0.00453845	130.5	13.4	2.305
Daporinad	LOUCY	-6.78182	-4.88853	0.00113421	0.00753245	564.12	27.92	6.641
Daporinad	NALM-6	-7.51915	-5.42643	0.000542592	0.00439875	710.69	27.83	8.107
Daporinad	NAMALWA	-7.05536	-5.16755	0.000862773	0.00569852	560.49	26.76	6.605
Daporinad	NOMO-1	-7.68989	-5.19832	0.000457426	0.00552583	1108.03	32.4	12.08
Daporinad	NCI-N87	-3.41558	-3.32091	0.0328574	0.0361201	9.93	2.77	1.099
Daporinad	P31-FUJ	-6.2905	-5.66856	0.00185383	0.00345283	86.25	9.89	1.863
Daporinad	SK-CO-1	-3.61875	-4.36803	0.0268162	0.0126762	52.73	20.71	0.473
Daporinad	SK-HEP-1	-5.18842	-4.23594	0.00558084	0.0144662	159.21	18.36	2.592
Daporinad	SK-MEL-3	-2.97444	-3.68767	0.051076	0.0250303	50.99	23.98	0.49
Daporinad	SK-MEL-24	-0.0766408	-4.73947	0.926222	0.00874328	99.06	6084	0.009
Daporinad	SNU-387	-2.42039	-3.87554	0.0888869	0.0207431	76.66	60.12	0.233
Daporinad	SW948	-4.55012	-5.11703	0.0105659	0.00599379	43.27	12.46	0.567
Daporinad	THP-1	-5.98146	-4.42698	0.00252513	0.0119505	373.26	25.99	4.733
Daporinad	PSN1	-4.61484	-5.09641	0.00990377	0.00611869	38.22	10.44	0.618
Daporinad	BL-41	-7.1729	-5.14488	0.000767098	0.00582915	659.9	28.27	7.599
Daporinad	RL	-4.90459	-5.35126	0.0074125	0.00474219	36.02	9.11	0.64
Daporinad	UACC-812	-0.149548	-4.18085	0.861097	0.0152855	98.22	2695.66	0.018
Daporinad	RERF-LC-MS	-3.62611	-5.22436	0.0266194	0.0053838	79.77	44.08	0.202
Daporinad	COR-L279	-6.45829	-4.09248	0.00156747	0.0166979	965.28	36.63	10.653
Daporinad	22RV1	-3.11278	-3.65458	0.044477	0.0258724	41.83	17.41	0.582
Daporinad	HDLM-2	-5.43533	-4.01807	0.00435981	0.0179877	312.58	26.07	4.126
Daporinad	Caov-4	-0.781059	-4.90547	0.457921	0.007406	98.38	528.05	0.016
Daporinad	HARA	-5.92003	-3.98357	0.00268512	0.0186191	593.42	32.71	6.934
Daporinad	NCI-H841	-3.54588	-2.84062	0.0288434	0.0583894	102.44	19.89	2.024
Daporinad	FU97	-2.12757	-4.33177	0.119126	0.0131443	88.97	103.6	0.11
Daporinad	HCC-78	-4.68384	-4.92494	0.0092434	0.00726313	21.42	5.15	0.786
Daporinad	OCUM-1	-4.72917	-4.51039	0.0088338	0.0109942	24.46	4.63	1.245
Daporinad	PANC-04-03	-2.00088	-1.63517	0.135216	0.194919	44.15	18.28	1.442
Daporinad	ME-1	-4.50873	-3.66942	0.0110124	0.0254913	131.48	18.62	2.315
Daporinad	SNU-81	-3.43095	-4.0403	0.0323563	0.0175922	45.63	17.76	0.544
Dasatinib	5637	-1.82902	-0.45352	0.160571	0.635388	295.71	75.2	3.957
Dasatinib	NCI-H1648	-1.44377	-0.553296	0.236035	0.575051	143.63	61.68	2.436
Dasatinib	NCI-H2052	0.338108	-0.55331	1.40229	0.575043	58.99	263.65	0.41
Dasatinib	EPLC-272H	-1.78139	-0.235561	0.168403	0.790128	369.19	86.78	4.692
Dasatinib	HSC-2	-1.65238	-0.507891	0.191593	0.601764	214.08	69.26	3.141
Dasatinib	KYSE-520	-1.13464	-0.453863	0.321539	0.63517	97.54	60	1.975
Dasatinib	TE-1	-1.02905	-0.442181	0.357347	0.642633	79.83	57.03	1.798
Dasatinib	TE-8	-1.71805	-2.27732	0.179415	0.102559	42.84	32.55	0.572
Dasatinib	Hs-578-T	-2.58598	-1.12969	0.0753219	0.323135	329.01	56.32	4.29
Dasatinib	IGROV-1	-3.34756	0.171544	0.03517	1.18714	3275.43	105.12	33.754
Dasatinib	HOP-62	-0.472576	-0.908194	0.623394	0.403252	35.31	92.18	0.647
Dasatinib	BHT-101	-0.286862	-0.0097066	0.750615	0.99034	31.94	96.62	1.319
Dasatinib	8305C	-0.57959	0.188845	0.560128	1.20785	115.64	132.58	2.156
Dasatinib	DK-MG	0.406563	-0.178164	1.50165	0.836806	44.27	143.82	0.557
Dasatinib	DOHH-2	-4.38056	-2.3085	0.0125184	0.0994098	694.11	47.3	7.941
Dasatinib	HuP-T3	-1.43123	-0.302217	0.239014	0.739178	209.26	78.88	3.093
Dasatinib	KYSE-180	-0.245181	0.203562	0.782563	1.22576	56.63	183.03	1.566
Dasatinib	MEG-01	-8.65838	-2.73927	0.000173665	0.0646173	37108	68.36	372.08
Dasatinib	MKN1	0.027163	0.0511528	1.02754	1.05248	2.43	88.32	1.024
Dasatinib	NCI-H2452	-1.34093	-0.808199	0.261603	0.44566	70.36	39.73	1.704
Dasatinib	NCI-H28	-0.45968	0.443434	0.631486	1.55805	146.73	196.47	2.467
Dasatinib	PF-382	-1.1617	-1.99575	0.312952	0.135911	56.57	71.8	0.434
Dasatinib	SNG-M	-1.28751	-1.41889	0.275958	0.241983	12.31	10.2	0.877
Dasatinib	OAW-42	0.0765228	-0.601757	1.07953	0.547848	49.25	886.38	0.507
Dasatinib	BV-173	-6.00165	-1.75118	0.00247467	0.173569	6913.84	70.82	70.138
Dasatinib	CAS-1	-0.043874	0.130459	0.957075	1.13935	19.05	397.35	1.19
Dasatinib	HARA	0.34585	-0.055118	1.41319	0.946373	33.03	115.94	0.67
Dasatinib	LOU-NH91	-0.32763	-0.0890446	0.72063	0.914805	26.95	72.82	1.269
Dasatinib	OE21	0.169398	-0.38258	1.18459	0.682099	42.42	325.85	0.576
Dasatinib	RCH-ACV	-3.49011	-0.288364	0.0304974	0.749489	2357.55	91.74	24.575
Dasatinib	JHOS-2	0.302502	0.13466	1.35324	1.14415	15.45	55.48	0.845
Dihydrorotenone	Calu-3	-1.38753	-0.583343	0.249692	0.55803	123.49	57.96	2.235
Dihydrorotenone	NCI-H209	-0.833553	-0.562292	0.434503	0.569901	31.16	32.54	1.312
Dihydrorotenone	HCC1187	-2.73709	-1.08738	0.0647582	0.337099	420.55	60.27	5.205
Dihydrorotenone	CAL-33	-1.28703	-0.653625	0.27609	0.520157	88.4	49.21	1.884
Dihydrorotenone	SK-MM-2	-2.98233	-1.30294	0.0506744	0.271733	436.23	56.31	5.362
Dihydrorotenone	K-562	-2.08574	-0.937195	0.124216	0.391725	215.36	55.07	3.154
Dihydrorotenone	SK-MEL-5	-0.805492	-1.04412	0.446868	0.352001	21.23	29.63	0.788
Dihydrorotenone	COLO-792	-0.271988	-0.667992	0.761863	0.512737	32.7	145.6	0.673
Dihydrorotenone	G-361	-0.305387	-0.623598	0.736838	0.536013	27.26	104.2	0.727
Dihydrorotenone	HT-1080	-2.96986	-1.00671	0.0513107	0.36542	612.17	66.1	7.122
Dihydrorotenone	KU812	-2.42498	-1.06444	0.0884798	0.344921	289.83	56.11	3.898
Dihydrorotenone	CW-2	-0.600376	-0.977316	0.548605	0.37632	31.4	62.78	0.686
Dihydrorotenone	COLO-668	-1.07711	-1.45505	0.340579	0.233389	31.47	35.09	0.685
Dihydrorotenone	NCI-H211	-1.00718	-0.595844	0.365248	0.551097	50.88	40.84	1.509
Dihydrorotenone	NCI-H841	-0.62891	-0.764094	0.533173	0.465756	12.64	21.49	0.874
Dihydrorotenone	TOV-112D	-0.573834	-0.828402	0.563361	0.436747	22.47	44.36	0.775
Dihydrorotenone	OV-56	-0.103609	-0.284574	0.901578	0.752335	16.55	174.66	0.834
Dihydrorotenone	SNU-81	-2.65117	-0.505658	0.0705684	0.603109	754.64	80.93	8.546
Dinaciclib	U-118-MG	-1.58547	-2.12084	0.204852	0.119931	41.45	33.77	0.585
Dinaciclib	NCI-H1092	-1.04938	-1.80454	0.350156	0.16455	53.01	71.96	0.47
Dinaciclib	NCI-H1963	-2.97372	-3.34825	0.0511127	0.0351457	31.24	12.59	0.688
Dinaciclib	NCI-H2029	-2.08789	-2.37617	0.123948	0.0929058	25.04	13.81	0.75
Dinaciclib	NCI-H2030	-2.66935	-1.43899	0.0692973	0.237167	242.25	46.09	3.422
Dinaciclib	SK-N-AS	-3.35124	-1.96919	0.0350409	0.13957	298.31	41.24	3.983
Dinaciclib	Calu-6	-1.47554	-3.00122	0.228656	0.0497264	78.25	103.4	0.217
Dinaciclib	NCI-H1792	-3.65506	-4.0366	0.0258599	0.0176573	31.72	10.44	0.683
Dinaciclib	HCC1143	-2.47971	-2.53636	0.0837671	0.0791544	5.51	2.28	0.945
Dinaciclib	CAL-12T	-1.75754	-2.29028	0.172468	0.101238	41.3	30.31	0.587
Dinaciclib	EBC-1	-1.82201	-3.66154	0.161701	0.025693	84.11	100.96	0.159
Dinaciclib	EPLC-272H	-4.0505	-3.14696	0.0174137	0.0429825	146.83	22.31	2.468
Dinaciclib	NCI-H522	-3.53672	-0.739186	0.0291086	0.477502	1540.42	79.1	16.404
Dinaciclib	T47D	-1.26997	-1.24024	0.28084	0.289315	3.02	2.34	1.03
Dinaciclib	SK-MEL-5	-2.50025	-2.54288	0.0820646	0.0786394	4.17	1.71	0.958
Dinaciclib	SW620	-3.5587	-3.48024	0.0284757	0.0308001	8.16	2.2	1.082
Dinaciclib	IGROV-1	-2.8891	-3.56073	0.055626	0.028418	48.91	23.25	0.511
Dinaciclib	KM12	-3.62122	-3.11051	0.02675	0.0445782	66.65	14.1	1.666
Dinaciclib	A2058	-2.92755	-2.63226	0.0535282	0.0719158	34.35	10.09	1.344
Dinaciclib	A375	-4.06989	-3.83571	0.0170793	0.0215859	26.39	5.75	1.264
Dinaciclib	COR-L105	-2.16625	-2.69868	0.114606	0.0672941	41.28	24.58	0.587
Dinaciclib	CHP-212	-1.6079	-4.72439	0.200308	0.00887611	95.57	193.82	0.044
Dinaciclib	Detroit562	-3.54553	-2.1068	0.0288532	0.121626	321.53	40.58	4.215
Dinaciclib	FADU	-2.30736	-3.76194	0.0995238	0.0232386	76.65	63.04	0.233
Dinaciclib	GAMG	-2.45306	-3.57685	0.0860302	0.0279637	67.5	45.81	0.325
Dinaciclib	GI-1	-2.98553	-2.56255	0.0505128	0.0771077	52.65	14.17	1.526
Dinaciclib	HCC1569	-2.17951	-2.85218	0.113097	0.0577183	48.97	30.86	0.51
Dinaciclib	KG-1	-3.35899	-2.01167	0.0347703	0.133765	284.71	40.11	3.847
Dinaciclib	KMS-12-BM	-4.17057	-3.81467	0.0154435	0.022045	42.75	8.53	1.427
Dinaciclib	HT-115	-1.83334	-2.62311	0.159879	0.0725767	54.61	43.08	0.454
Dinaciclib	KYSE-180	-3.75236	-1.80742	0.0234622	0.164077	599.32	51.83	6.993
Dinaciclib	LoVo	-2.16359	-3.59004	0.114911	0.0275971	75.98	65.93	0.24
Dinaciclib	MDA-MB-453	-2.95931	-3.67538	0.0518547	0.0253398	51.13	24.2	0.489
Dinaciclib	MFE-296	-0.366712	-1.1919	0.693009	0.303643	56.18	225.02	0.438
Dinaciclib	NCI-H747	-1.50597	-3.24858	0.221802	0.0388294	82.49	115.71	0.175
Dinaciclib	SKM-1	-4.43288	-4.29172	0.0118802	0.0136814	15.16	3.18	1.152
Dinaciclib	SK-MEL-24	-2.70438	-2.75891	0.0669115	0.0633608	5.31	2.02	0.947
Dinaciclib	SK-MEL-30	-3.97349	-2.42748	0.0188078	0.0882587	369.27	38.91	4.693
Dinaciclib	SW837	-0.581062	-1.82357	0.559304	0.161448	71.13	213.83	0.289
Dinaciclib	SW948	-0.679866	-3.03576	0.506685	0.0480379	90.52	346.52	0.095
Dinaciclib	SCC-25	-3.24242	-1.07915	0.0390692	0.339884	769.95	66.72	8.7
Dinaciclib	SCC-15	-2.99641	-2.71037	0.0499661	0.0665119	33.11	9.55	1.331
Dinaciclib	A704	-3.12701	-1.06243	0.0438489	0.345615	688.2	66.02	7.882
Dinaciclib	BFTC-905	-3.40925	-3.70327	0.033066	0.0246428	25.47	8.62	0.745
Dinaciclib	CML-T1	-3.82586	-3.20767	0.0217997	0.0404507	85.56	16.16	1.856
Dinaciclib	MDA-MB-415	-2.69066	-3.35542	0.067836	0.0348948	48.56	24.71	0.514
Dinaciclib	NCI-H1975	-2.23457	-2.09525	0.107038	0.123039	14.95	6.23	1.149
Dinaciclib	TE-441-T	-4.86081	-3.1949	0.00774425	0.0409707	429.05	34.27	5.29
Dinaciclib	PANC-10-05	-1.18368	-0.352824	0.30615	0.702701	129.53	70.19	2.295
Dinaciclib	TE-6	-3.43328	-2.7489	0.032281	0.063998	98.25	19.93	1.983
Dinaciclib	CCK-81	-3.5582	-2.48771	0.02849	0.0830999	191.68	30.09	2.917
Dinaciclib	HCC-366	-2.54855	-2.89519	0.0781951	0.0552884	29.29	13.6	0.707
Dinaciclib	MDA-MB-436	-0.229908	-2.66225	0.794607	0.0697909	91.22	1057.96	0.088
Dinaciclib	NCI-H1944	-3.03047	-1.96689	0.0482929	0.139891	189.67	35.1	2.897
Dinaciclib	NCI-H2023	-2.60218	-2.26971	0.0741116	0.103342	39.44	12.78	1.394
Dinaciclib	NCI-H211	-3.57536	-3.72421	0.0280054	0.0241321	13.83	4.16	0.862
Dinaciclib	OVISE	-1.96279	-1.34992	0.140465	0.259261	84.57	31.22	1.846
Dinaciclib	BICR31	-1.7647	-2.79361	0.171238	0.0611996	64.26	58.31	0.357
Dinaciclib	CL-11	-0.257309	-2.22947	0.773129	0.107585	86.08	766.46	0.139
Dinaciclib	EFM-192A	-3.04278	-1.91116	0.0477021	0.147909	210.07	37.19	3.101
Dinaciclib	AMO-1	-4.42807	-4.79777	0.0119375	0.00824809	30.91	8.35	0.691
Dinaciclib	OCUM-1	-2.42721	-3.89827	0.0882826	0.0202769	77.03	60.61	0.23
Dinaciclib	PA-TU-8902	-1.13699	-2.62466	0.320782	0.0724645	77.41	130.84	0.226
Dinaciclib	RERF-LC-KJ	-2.94582	-1.59457	0.0525588	0.202996	286.23	45.87	3.862
Dinaciclib	VCaP	-3.60096	-1.38917	0.0272976	0.249282	813.2	61.42	9.132
Dinaciclib	WM793B	-2.39058	-3.13155	0.0915767	0.04365	52.34	31	0.477
Dinaciclib	JM1	-4.37627	-4.06336	0.0125721	0.0171912	36.74	7.15	1.367
Dinaciclib	ME-1	-2.72449	-1.38241	0.0655799	0.250974	282.7	49.26	3.827
Dinaciclib	MOLM-16	-4.06822	-3.90302	0.0171078	0.0201808	17.96	4.06	1.18
Dinaciclib	NCI-H1876	-2.38303	-2.87319	0.0922707	0.0565181	38.75	20.57	0.613
Dinaciclib	OCI-LY-19	-4.369	-3.79755	0.0126639	0.0224257	77.08	13.08	1.771
Dinaciclib	PL-21	-4.81542	-4.16115	0.00810384	0.0155897	92.37	13.59	1.924
Dinaciclib	SU-DHL-6	-3.96721	-4.13304	0.0189262	0.016034	15.28	4.18	0.847
Dinaciclib	OVK-18	-4.12994	-1.27864	0.0160838	0.278415	1631.02	69.04	17.31
Doramapimod	JEKO-1	1.98202	1.72738	7.25742	5.62592	22.48	12.85	0.775
Doramapimod	KMS-11	1.89881	1.60879	6.67797	4.99677	25.18	15.27	0.748
Elephantin	COR-L311	2.98778	2.21262	19.8415	9.13963	53.94	25.94	0.461
Elephantin	SK-N-DZ	2.22268	1.80766	9.23199	6.09619	33.97	18.67	0.66
Elephantin	HCC2157	2.96827	2.21561	19.4582	9.16702	52.89	25.36	0.471
Elephantin	K-562	2.77492	2.24534	16.0373	9.44365	41.11	19.08	0.589
Elephantin	RPMI-8226	1.88916	2.3641	6.61384	10.6345	60.79	25.14	1.608
Elephantin	SF539	2.17998	2.24468	8.84609	9.43741	6.68	2.97	1.067
Elephantin	COLO-792	2.11231	2.27942	8.26728	9.77105	18.19	7.91	1.182
Elephantin	Daudi	1.22072	2.18516	3.38964	8.89208	162.33	79.01	2.623
Elephantin	ECC10	2.52001	2.65344	12.4287	14.2028	14.27	5.29	1.143
Elephantin	EM-2	2.40729	1.78328	11.1038	5.94932	46.42	25.92	0.536
Elephantin	ESS-1	2.48106	2.27584	11.9539	9.73613	18.55	8.27	0.814
Elephantin	H4	2.9061	1.65127	18.2853	5.21361	71.49	43.18	0.285
Elephantin	KMS-12-BM	1.88961	1.89861	6.61681	6.67663	0.9	0.48	1.009
Elephantin	L-540	2.60664	2.25182	13.5534	9.50501	29.87	13.61	0.701
Elephantin	LP-1	2.20466	2.50902	9.06713	12.2929	35.58	13.81	1.356
Elephantin	LS-513	1.96435	2.37744	7.13028	10.7773	51.15	21.03	1.511
Elephantin	MHH-CALL-2	2.08916	2.02077	8.07816	7.5441	6.61	3.27	0.934
Elephantin	REH	2.57765	2.19003	13.1662	8.93546	32.13	15.04	0.679
Elephantin	SKM-1	2.47267	1.95996	11.8541	7.09906	40.11	20.73	0.599
Elephantin	SNU-423	2.19175	2.10815	8.95083	8.23301	8.02	3.81	0.92
Elephantin	SUP-T1	1.74761	1.98618	5.74089	7.28767	26.94	13.65	1.269
Elephantin	A4-Fuk	1.22302	1.72439	3.39743	5.60911	65.1	40.99	1.651
Elephantin	OCI-AML2	2.26746	1.47899	9.65483	4.38851	54.55	34.77	0.455
Elephantin	IGR-37	2.52944	2.57402	12.5465	13.1184	4.56	1.76	1.046
Elephantin	SUP-B15	2.19582	1.96136	8.98733	7.109	20.9	10.68	0.791
Elephantin	ALL-SIL	1.81336	2.08636	6.131	8.05551	31.39	15.05	1.314
Elephantin	VCaP	2.58834	2.98314	13.3076	19.7498	48.41	15.25	1.484
Elephantin	WM793B	2.97235	2.55737	19.5378	12.9018	33.96	13.96	0.66
Elephantin	OCI-M1	2.12223	1.53812	8.34977	4.65583	44.24	27.52	0.558
Elephantin	SU-DHL-10	1.88426	1.70449	6.58147	5.4986	16.45	9.54	0.835
Elephantin	SU-DHL-5	0.549797	0.96798	1.7329	2.63262	51.92	76.06	1.519
Elephantin	OVK-18	2.0642	2.50939	7.87899	12.2974	56.08	21.57	1.561
Elesclomol	SW620	-1.89367	-2.84005	0.150519	0.0584226	61.19	49.98	0.388
Elesclomol	ABC-1	-5.14165	-2.07697	0.00584804	0.12531	2042.76	59.61	21.428
Elesclomol	ECC12	-3.25598	-2.04479	0.038543	0.129408	235.75	37.2	3.357
Elesclomol	SU-DHL-1	-4.13564	-3.41003	0.0159925	0.0330402	106.6	17.55	2.066
Elesclomol	NCI-H838	-3.02941	-3.72892	0.0483443	0.0240187	50.32	23.09	0.497
Elesclomol	CHP-126	-1.96108	-3.37718	0.140707	0.0341435	75.73	72.21	0.243
Elesclomol	RERF-LC-MS	-3.46204	-3.33799	0.0313656	0.0355081	13.21	3.58	1.132
Elesclomol	JM1	-2.75724	-3.98449	0.0634668	0.0186019	70.69	44.51	0.293
Elesclomol	KMS-11	-3.13712	-4.77838	0.0434078	0.00840964	80.63	52.32	0.194
Entinostat	SK-ES-1	1.40571	0.476434	4.07842	1.61032	60.52	66.11	0.395
Entinostat	DMS-273	2.18729	1.08399	8.91107	2.95646	66.82	50.44	0.332
Entinostat	NCI-H526	0.351748	0.776404	1.42155	2.17364	52.91	120.73	1.529
Entinostat	HCC1599	-0.329985	0.6656	0.718935	1.94566	170.63	301.71	2.706
Entinostat	EC-GI-10	1.55318	0.85852	4.72647	2.35967	50.08	44.72	0.499
Entinostat	EPLC-272H	1.84564	1.65181	6.33216	5.21642	17.62	10.5	0.824
Entinostat	HCT-116	1.2433	0.875361	3.46704	2.39974	30.78	29.59	0.692
Entinostat	HL-60	0.657198	0.452287	1.92938	1.5719	18.53	31.18	0.815
Entinostat	BT-549	1.73888	1.43476	5.69098	4.19866	26.22	17.49	0.738
Entinostat	SK-MEL-2	1.65547	1.03556	5.23553	2.81668	46.2	37.45	0.538
Entinostat	RPMI-8226	0.033166	0.669897	1.03372	1.95404	89.03	1919.83	1.89
Entinostat	LOXIMVI	0.458223	0.93079	1.58126	2.53651	60.41	103.13	1.604
Entinostat	A2058	1.61452	1.15701	5.02546	3.1804	36.71	28.34	0.633
Entinostat	COLO-800	0.585236	1.09195	1.79541	2.98009	65.98	86.58	1.66
Entinostat	DOHH-2	0.25489	0.466104	1.29032	1.59377	23.52	82.86	1.235
Entinostat	HCC70	0.410397	1.11031	1.50742	3.03529	101.36	170.54	2.014
Entinostat	KYSE-510	1.37141	1.48942	3.94091	4.43454	12.53	8.61	1.125
Entinostat	L-428	1.00128	1.22657	2.72177	3.40951	25.27	22.5	1.253
Entinostat	LAMA-84	0.710211	0.907306	2.03442	2.47764	21.79	27.75	1.218
Entinostat	LOUCY	-0.095749	0.464605	0.908692	1.59139	75.13	585.23	1.751
Entinostat	MDA-MB-361	-0.186396	0.775453	0.829945	2.17158	161.65	516.02	2.617
Entinostat	MDA-MB-453	0.920784	0.888089	2.51126	2.43048	3.22	3.55	0.968
Entinostat	MEL-JUSO	2.07874	1.59195	7.99439	4.91334	38.54	23.42	0.615
Entinostat	MEG-01	1.03143	0.460485	2.80508	1.58484	43.5	55.35	0.565
Entinostat	NCI-H1155	1.53091	1.01926	4.62238	2.77114	40.05	33.42	0.6
Entinostat	RD	0.983218	1.23959	2.67304	3.45419	29.22	26.07	1.292
Entinostat	REH	2.16952	1.05728	8.75406	2.87854	67.12	51.27	0.329
Entinostat	RS4-11	2.10115	0.343452	8.17553	1.40981	82.76	83.65	0.172
Entinostat	SIG-M5	-1.7488	-0.0178754	0.173982	0.982283	464.59	98.98	5.646
Entinostat	SKM-1	-0.185664	0.712774	0.830553	2.03964	145.58	483.91	2.456
Entinostat	NCI-H838	0.678038	1.16211	1.97001	3.19666	62.27	71.39	1.623
Entinostat	OE33	1.02223	1.12388	2.77938	3.07677	10.7	9.94	1.107
Entinostat	CHP-126	-0.755083	0.711884	0.469972	2.03783	333.61	194.28	4.336
Entinostat	COLO-668	1.95501	1.24489	7.06399	3.47255	50.84	36.32	0.492
Entinostat	CA46	0.897021	0.935994	2.45229	2.54975	3.97	4.34	1.04
Entinostat	22RV1	1.98739	0.796784	7.29644	2.2184	69.6	59.91	0.304
Entinostat	TE-441-T	0.27391	0.726252	1.3151	2.06732	57.2	165.14	1.572
Entinostat	MKN7	0.668822	1.52281	1.95194	4.58509	134.9	127.69	2.349
Entinostat	Jurkat	0.061704	0.44639	1.06365	1.56266	46.92	623.44	1.469
Entinostat	ES-2	1.32497	0.941568	3.76208	2.564	31.85	28.94	0.682
Entinostat	EFM-192A	1.05076	1.27488	2.85982	3.57829	25.12	21.33	1.251
Entinostat	NUGC-4	1.15946	1.40363	3.18822	4.06996	27.66	21.06	1.277
Entinostat	GA-10	-0.0080312	0.19968	0.992001	1.22101	23.09	2586.3	1.231
Entinostat	KOPN-8	-0.214763	-0.130278	0.806732	0.877851	8.82	39.34	1.088
Entinostat	MOLM-13	-0.776872	-0.0173068	0.459842	0.982842	113.73	97.77	2.137
Entinostat	NCI-H1876	0.736257	0.702169	2.0881	2.01813	3.35	4.63	0.966
Entinostat	NU-DUL-1	-0.854657	0.141088	0.425429	1.15153	170.67	116.51	2.707
Entinostat	TE-4	1.3569	1.58535	3.88412	4.88102	25.67	16.84	1.257
Entinostat	SNU-61	1.05942	2.09844	2.88469	8.15345	182.65	98.08	2.826
Entinostat	SNU-C5	1.81409	0.943878	6.13547	2.56993	58.11	47.97	0.419
Entospletinib	RPMI-8226	2.19939	1.42454	9.01947	4.15593	53.92	35.23	0.461
Entospletinib	IGROV-1	2.28339	1.18853	9.80984	3.28224	66.54	47.95	0.335
Entospletinib	KM12	0.920019	1.04367	2.50934	2.83963	13.16	13.44	1.132
Entospletinib	A2780	2.038	1.22267	7.67527	3.39624	55.75	40.01	0.442
Entospletinib	ESS-1	1.60003	1.33865	4.95317	3.81391	23	16.34	0.77
Entospletinib	NALM-6	1.52641	0.95139	4.60163	2.58931	43.73	37.67	0.563
Entospletinib	RL	1.29983	1.46279	3.66867	4.31799	17.7	12.54	1.177
Entospletinib	A3-KAW	1.73548	0.801028	5.67168	2.22783	60.72	53.84	0.393
Entospletinib	NCI-H1975	2.04905	1.1775	7.76055	3.24624	58.17	42.53	0.418
Entospletinib	KOPN-8	1.96707	1.28697	7.14968	3.62178	49.34	34.57	0.507
Entospletinib	RCH-ACV	2.20566	1.07327	9.07623	2.92493	67.77	51.34	0.322
Epirubicin	TCCSUP	0.0895452	0.264323	1.09368	1.30255	19.1	195.18	1.191
Epirubicin	U-118-MG	-0.49787	-0.921155	0.607824	0.398059	34.51	85.02	0.655
Epirubicin	NCI-H1650	-0.754336	0.690034	0.470323	1.99378	323.92	191.48	4.239
Epirubicin	NCI-H2405	1.34359	0.470263	3.83279	1.60041	58.24	65	0.418
Epirubicin	NCI-H2087	0.261736	0.105747	1.29918	1.11154	14.44	59.6	0.856
Epirubicin	UM-UC-3	-1.06978	-0.62897	0.343086	0.533141	55.4	41.21	1.554
Epirubicin	SHP-77	-0.220526	0.0437034	0.802097	1.04467	30.24	119.82	1.302
Epirubicin	HCC1599	-1.08692	-1.77033	0.337254	0.170276	49.51	62.88	0.505
Epirubicin	HCC2218	0.13734	-0.47124	1.14722	0.624228	45.59	443.12	0.544
Epirubicin	BHY	0.49236	-0.548602	1.63617	0.577757	64.69	211.42	0.353
Epirubicin	DMS-79	-2.20569	-2.26366	0.110175	0.103969	5.63	2.63	0.944
Epirubicin	EC-GI-10	-1.6137	-1.44753	0.199149	0.235149	18.08	10.3	1.181
Epirubicin	EPLC-272H	-1.05008	-2.89849	0.349908	0.0551061	84.25	176.02	0.157
Epirubicin	LCLC-103H	0.053469	-0.336382	1.05492	0.71435	32.28	729.12	0.677
Epirubicin	PC-3	0.853422	0.402155	2.34767	1.49504	36.32	52.88	0.637
Epirubicin	K-562	-0.419449	-0.719254	0.657409	0.487116	25.9	71.48	0.741
Epirubicin	BT-549	-0.670156	-0.182577	0.511629	0.83312	62.84	72.76	1.628
Epirubicin	SK-MEL-2	-0.541553	-0.427337	0.581844	0.652244	12.1	21.09	1.121
Epirubicin	MDA-MB-231	-1.80951	-0.427108	0.163735	0.652393	298.44	76.4	3.984
Epirubicin	HOP-92	-0.374273	0.684825	0.687789	1.98343	188.38	282.97	2.884
Epirubicin	KM12	-2.46289	-0.849003	0.0851881	0.427841	402.23	65.53	5.022
Epirubicin	BxPC-3	0.009456	0.191336	1.0095	1.21087	19.95	1923.43	1.199
Epirubicin	ABC-1	-1.65004	-1.48685	0.192043	0.226084	17.73	9.89	1.177
Epirubicin	8305C	-0.246083	0.35853	0.781857	1.43122	83.05	245.69	1.831
Epirubicin	BT-20	0.472971	0.362179	1.60476	1.43646	10.49	23.42	0.895
Epirubicin	A2780	-3.25189	-3.27696	0.038701	0.0377429	2.48	0.77	0.975
Epirubicin	DOHH-2	-4.53247	-4.75361	0.0107541	0.00862054	19.84	4.88	0.802
Epirubicin	ECC10	-1.97773	-0.039004	0.138383	0.961747	594.99	98.03	6.95
Epirubicin	FADU	-1.73657	-2.42201	0.176124	0.0887434	49.61	39.47	0.504
Epirubicin	HT-1080	-1.30256	-0.553606	0.271836	0.574873	111.48	57.5	2.115
Epirubicin	IGR-1	-1.49268	-1.10949	0.224769	0.329728	46.7	25.67	1.467
Epirubicin	IPC-298	-1.36865	-2.15597	0.25445	0.11579	54.49	57.53	0.455
Epirubicin	JVM-3	-4.05326	-4.16517	0.0173657	0.015527	10.59	2.76	0.894
Epirubicin	KMS-12-BM	-2.09251	-1.93387	0.123377	0.144588	17.19	7.58	1.172
Epirubicin	KP-N-YN	-1.48769	-0.0205928	0.225893	0.979618	333.66	98.62	4.337
Epirubicin	MDA-MB-361	1.4996	-1.58676	4.47991	0.204587	95.43	205.81	0.046
Epirubicin	MEG-01	-1.52263	-2.15946	0.218138	0.115387	47.1	41.82	0.529
Epirubicin	MHH-CALL-2	-2.71785	-2.92532	0.0660167	0.0536474	18.74	7.63	0.813
Epirubicin	NCI-H716	1.5857	0.544748	4.88271	1.72417	64.69	65.65	0.353
Epirubicin	NCI-H1105	-0.063687	-0.59194	0.938299	0.553253	41.04	829.45	0.59
Epirubicin	P31-FUJ	-1.37869	-1.48275	0.251909	0.227012	9.88	7.55	0.901
Epirubicin	RCM-1	1.33159	0.239019	3.78707	1.27	66.46	82.05	0.335
Epirubicin	REH	-2.87569	-3.06644	0.0563772	0.0465867	17.37	6.63	0.826
Epirubicin	SIG-M5	-0.633646	-3.16855	0.530654	0.0420646	92.07	400.05	0.079
Epirubicin	SK-CO-1	-1.27734	-0.97732	0.278778	0.376318	34.99	23.49	1.35
Epirubicin	SK-MEL-30	-1.53826	0.015602	0.214753	1.01572	372.97	101.01	4.73
Epirubicin	SNG-M	-1.69782	0.229576	0.183083	1.25807	587.16	113.52	6.872
Epirubicin	SNU-423	-1.04484	-0.483323	0.351747	0.61673	75.33	53.74	1.753
Epirubicin	UACC-893	0.447025	-0.889617	1.56365	0.410813	73.73	299.01	0.263
Epirubicin	COLO-678	0.783996	0.639563	2.19021	1.89565	13.45	18.42	0.866
Epirubicin	CA46	-1.93547	-0.516373	0.144356	0.596681	313.34	73.32	4.133
Epirubicin	BV-173	-3.68163	-3.75235	0.025182	0.0234626	6.83	1.92	0.932
Epirubicin	A204	-2.2977	0.337349	0.10049	1.40123	1294.4	114.68	13.944
Epirubicin	NCI-H146	-0.147009	-0.415741	0.863286	0.659851	23.57	182.8	0.764
Epirubicin	ST486	-1.29901	-2.50592	0.272802	0.0816005	70.09	92.91	0.299
Epirubicin	UACC-812	-0.295789	0.225932	0.743944	1.25349	68.49	176.38	1.685
Epirubicin	A704	1.95305	0.849124	7.05019	2.3376	66.84	56.52	0.332
Epirubicin	CML-T1	-3.70649	-3.66553	0.0245635	0.0255905	4.18	1.11	1.042
Epirubicin	CAL-54	-0.939585	-2.2644	0.39079	0.103892	73.41	141	0.266
Epirubicin	HDLM-2	0.570694	-0.413281	1.76949	0.661476	62.62	172.42	0.374
Epirubicin	MDA-MB-415	0.076078	-0.785446	1.07905	0.455916	57.75	1132.42	0.423
Epirubicin	MKN45	-1.11172	-0.0843472	0.328994	0.919112	179.37	92.41	2.794
Epirubicin	TE-11	-1.16328	-1.31072	0.312461	0.269627	13.71	12.67	0.863
Epirubicin	COLO-783	-1.22505	-0.787503	0.293743	0.45498	54.89	35.72	1.549
Epirubicin	ES-2	-1.27263	-0.644034	0.280095	0.52517	87.5	49.39	1.875
Epirubicin	MDST8	-2.85501	-1.40991	0.0575551	0.244166	324.23	50.62	4.242
Epirubicin	OVISE	-0.630538	0.367311	0.532305	1.44385	171.24	158.25	2.712
Epirubicin	RERF-GC-1B	-1.38927	-0.546093	0.249258	0.579208	132.37	60.69	2.324
Epirubicin	BICR31	-0.014082	0.634436	0.986017	1.88596	91.27	4605.3	1.913
Epirubicin	EFM-192A	1.55271	0.133505	4.72426	1.14283	75.81	91.4	0.242
Epirubicin	FU97	-0.7907	-0.153888	0.453527	0.857368	89.04	80.54	1.89
Epirubicin	ALL-SIL	-2.64072	-3.58756	0.0713097	0.0276657	61.2	35.86	0.388
Epirubicin	AMO-1	-2.91263	-2.82609	0.0543326	0.059244	9.04	2.97	1.09
Epirubicin	DND-41	-2.03776	-2.79876	0.130321	0.0608858	53.28	37.34	0.467
Epirubicin	Hs-940-T	-0.672023	-1.15043	0.510674	0.316499	38.02	71.19	0.62
Epirubicin	NCI-H1781	-2.39184	-1.83019	0.0914614	0.160384	75.36	23.48	1.754
Epirubicin	OCUM-1	0.530019	-0.948079	1.69896	0.387485	77.19	278.88	0.228
Epirubicin	VCaP	-0.490976	0.399376	0.612029	1.49089	143.6	181.34	2.436
Epirubicin	PL-21	-1.58686	-2.78207	0.204567	0.06191	69.74	75.32	0.303
Epirubicin	SU-DHL-8	-2.61381	-3.27501	0.0732547	0.0378166	48.38	25.3	0.516
Epirubicin	WSU-DLCL2	-2.00778	-3.04361	0.134286	0.0476625	64.51	51.59	0.355
Epirubicin	MM1S	-2.57184	-2.70079	0.0763948	0.0671526	12.1	5.01	0.879
Erlotinib	NCI-H2170	0.600995	0.791006	1.82393	2.20561	20.93	31.62	1.209
Erlotinib	NCI-H2030	1.93632	1.30595	6.93318	3.69121	46.76	32.55	0.532
Erlotinib	NCI-H2122	0.570652	1.27111	1.76942	3.56481	101.47	122.75	2.015
Erlotinib	EC-GI-10	-0.294373	1.49246	0.744999	4.44802	497.05	607	5.971
Erlotinib	TE-1	0.37448	1.62993	1.45424	5.10351	250.94	335.25	3.509
Erlotinib	A549	2.12616	1.24827	8.38263	3.48431	58.43	41.29	0.416
Erlotinib	ACHN	0.122962	0.865927	1.13084	2.37721	110.22	604.22	2.102
Erlotinib	SK-MEL-28	1.84281	0.678878	6.31426	1.97166	68.77	63.16	0.312
Erlotinib	697	0.94029	0.971967	2.56072	2.64314	3.22	3.37	1.032
Erlotinib	ECC10	1.86039	1.32583	6.42623	3.7653	41.41	28.73	0.586
Erlotinib	EFO-27	1.69972	1.12902	5.4724	3.09263	43.49	33.58	0.565
Erlotinib	HGC-27	1.5818	1.24313	4.8637	3.46646	28.73	21.41	0.713
Erlotinib	HOS	1.79806	1.48915	6.03793	4.43333	26.58	17.18	0.734
Erlotinib	HuCCT1	1.66138	1.83352	5.26657	6.25587	18.78	10.36	1.188
Erlotinib	KU812	0.859294	1.54616	2.36149	4.69341	98.75	79.93	1.987
Erlotinib	KYSE-180	0.990813	1.32089	2.69342	3.74677	39.11	33.31	1.391
Erlotinib	MHH-CALL-2	1.33385	1.33504	3.79562	3.80014	0.12	0.09	1.001
Erlotinib	NAMALWA	2.18131	1.34711	8.8579	3.84628	56.58	38.24	0.434
Erlotinib	RMG-I	0.825472	-0.431705	2.28296	0.649401	71.55	152.3	0.284
Erlotinib	SCC-9	2.08356	0.660806	8.03298	1.93635	75.89	68.28	0.241
Erlotinib	SW1116	1.98118	1.74957	7.2513	5.75212	20.67	11.69	0.793
Erlotinib	SW1463	2.19451	0.708977	8.97564	2.03191	77.36	67.69	0.226
Erlotinib	CW-2	1.95605	0.413741	7.07133	1.51247	78.61	78.85	0.214
Erlotinib	A3-KAW	0.56646	1.20298	1.76202	3.33003	88.99	112.37	1.89
Erlotinib	CAL-54	0.080972	0.198457	1.08434	1.21952	12.47	145.09	1.125
Erlotinib	NCI-H1975	1.92341	0.348089	6.84424	1.41636	79.31	81.9	0.207
Erlotinib	TE-11	1.10072	0.71629	3.00632	2.04683	31.92	34.93	0.681
Erlotinib	Jurkat	1.32371	1.32668	3.75734	3.76851	0.3	0.22	1.003
Erlotinib	LN-229	1.75641	1.70765	5.79161	5.51598	4.76	2.78	0.952
Erlotinib	OVISE	1.76682	1.16924	5.85224	3.21954	44.99	33.82	0.55
Erlotinib	RERF-GC-1B	1.99535	1.22991	7.35474	3.42092	53.49	38.36	0.465
Erlotinib	SNU-398	2.17057	0.655171	8.76327	1.92547	78.03	69.82	0.22
Erlotinib	OVTOKO	2.15216	1.26112	8.6034	3.52938	58.98	41.4	0.41
Erlotinib	MOLM-13	0.196948	1.1501	1.21768	3.15852	159.39	483.96	2.594
Erlotinib	SU-DHL-10	1.69722	1.05896	5.45873	2.88337	47.18	37.61	0.528
Erlotinib	SNU-175	0.774098	1.02399	2.16864	2.78427	28.39	32.28	1.284
Fludarabine	SK-ES-1	2.64278	1.11513	14.0522	3.04996	78.3	57.8	0.217
Fludarabine	U-118-MG	-0.138672	2.12268	0.870514	8.35346	859.6	1630.72	9.596
Fludarabine	KG-1	2.24486	1.87517	9.43911	6.52195	30.9	16.47	0.691
Fludarabine	PF-382	2.02509	1.52184	7.57676	4.58065	39.54	24.85	0.605
Fludarabine	RPMI-7951	2.3142	1.51742	10.1168	4.56046	54.92	34.43	0.451
Fludarabine	OCI-AML2	0.983294	1.16382	2.67325	3.20213	19.78	18.36	1.198
Fludarabine	CAL-54	-2.74238	0.591755	0.0644168	1.80716	2705.41	121.58	28.054
Fludarabine	Jurkat	0.555808	0.97419	1.74335	2.64902	51.95	75.27	1.52
Fludarabine	BICR22	1.75407	1.37251	5.77807	3.94523	31.72	21.75	0.683
Fludarabine	SNU-398	0.0855792	1.43625	1.08935	4.20489	286	1578.27	3.86
Fludarabine	GA-10	1.32103	1.2793	3.74729	3.59413	4.09	3.16	0.959
Fludarabine	SU-DHL-5	-1.11268	1.09511	0.328678	2.98951	809.56	198.42	9.096
Foretinib	COLO-829	1.09193	1.18114	2.98003	3.25807	9.33	8.17	1.093
Foretinib	GB-1	1.19417	0.531063	3.3008	1.70074	48.47	55.53	0.515
Foretinib	ChaGo-K-1	1.53725	1.58217	4.65176	4.86548	4.59	2.92	1.046
Foretinib	NCI-H1648	0.284696	0.427688	1.32936	1.53371	15.37	50.23	1.154
Foretinib	NCI-H1048	-0.0481308	0.633444	0.953009	1.88409	97.7	1416.09	1.977
Foretinib	NCI-H209	1.10794	0.517306	3.02811	1.6775	44.6	53.31	0.554
Foretinib	NCI-H69	0.251864	0.168986	1.28642	1.1841	7.95	32.91	0.92
Foretinib	SK-N-SH	0.008592	0.113473	1.00863	1.12016	11.06	1220.68	1.111
Foretinib	NCI-H650	1.41083	1.67345	4.09938	5.33055	30.03	18.61	1.3
Foretinib	NCI-H2087	1.8143	0.939566	6.13679	2.55887	58.3	48.21	0.417
Foretinib	HPAF-II	1.15747	1.15858	3.18189	3.18542	0.11	0.1	1.001
Foretinib	HCC1143	1.2913	0.187114	3.63751	1.20576	66.85	85.51	0.331
Foretinib	CAL-12T	0.597636	0.7163	1.81782	2.04685	12.6	19.86	1.126
Foretinib	CAL-33	-0.131013	0.443935	0.877207	1.55883	77.7	438.85	1.777
Foretinib	EC-GI-10	1.22182	0.280507	3.39335	1.3238	60.99	77.04	0.39
Foretinib	TE-15	1.74277	0.0734972	5.71316	1.07627	81.16	95.78	0.188
Foretinib	HCT-116	0.574815	0.637876	1.7768	1.89246	6.51	10.97	1.065
Foretinib	HCT-15	0.858681	0.653658	2.36005	1.92256	18.54	23.88	0.815
Foretinib	A549	0.4073	-0.104938	1.50275	0.900381	40.08	125.76	0.599
Foretinib	SK-MEL-2	1.92045	0.96417	6.82406	2.62261	61.57	49.79	0.384
Foretinib	LOXIMVI	0.287635	0.330359	1.33327	1.39147	4.36	14.85	1.044
Foretinib	UACC-257	1.40378	1.32222	4.07054	3.75174	7.83	5.81	0.922
Foretinib	ABC-1	0.550446	0.699179	1.73403	2.0121	16.04	27.02	1.16
Foretinib	A2780	-0.699535	0.280331	0.496816	1.32357	166.41	140.07	2.664
Foretinib	Detroit562	-0.267836	0.8471	0.765033	2.33287	204.94	416.28	3.049
Foretinib	DU-4475	0.13803	0.76913	1.14801	2.15789	87.97	457.22	1.88
Foretinib	EFO-27	2.12377	0.72911	8.36261	2.07323	75.21	65.67	0.248
Foretinib	GAMG	1.31467	0.24733	3.72353	1.2806	65.61	81.19	0.344
Foretinib	GCT	0.988495	1.85063	2.68719	6.36383	136.82	87.22	2.368
Foretinib	HCC1806	1.14141	0.39568	3.13119	1.48539	52.56	65.33	0.474
Foretinib	HGC-27	-0.187741	0.263821	0.828829	1.30189	57.08	240.52	1.571
Foretinib	HuCCT1	1.1763	1.26324	3.24234	3.53685	9.08	7.39	1.091
Foretinib	IGR-1	1.64259	1.05043	5.16856	2.85889	44.69	36.05	0.553
Foretinib	IPC-298	0.946418	0.911278	2.57646	2.4875	3.45	3.71	0.965
Foretinib	HuP-T3	1.98374	0.699884	7.2699	2.01352	72.3	64.72	0.277
Foretinib	KU812	-2.60731	0.522965	0.0737325	1.68702	2188.03	120.06	22.88
Foretinib	L-540	1.06509	-0.34183	2.90109	0.710469	75.51	132.09	0.245
Foretinib	LOUCY	-0.891175	0.126708	0.410173	1.13509	176.73	114.22	2.767
Foretinib	MEL-HO	0.861594	0.681106	2.36693	1.97606	16.51	20.95	0.835
Foretinib	MEG-01	-2.01484	0.317757	0.133342	1.37404	930.46	115.77	10.305
Foretinib	MES-SA	0.369144	0.662689	1.4465	1.94	34.12	79.52	1.341
Foretinib	NCI-H747	1.53481	0.992312	4.64043	2.69746	41.87	35.35	0.581
Foretinib	NCI-H1436	0.044246	0.892773	1.04524	2.44189	133.62	1917.75	2.336
Foretinib	NCI-H28	1.62739	0.92113	5.09058	2.51213	50.65	43.4	0.493
Foretinib	RT-112	-0.33284	1.28814	0.716885	3.62605	405.81	487.02	5.058
Foretinib	SJSA-1	1.3598	0.711664	3.89543	2.03738	47.7	47.66	0.523
Foretinib	SK-MEL-24	1.12577	0.309564	3.08258	1.36283	55.79	72.5	0.442
Foretinib	SK-MEL-31	1.26273	1.54037	3.53507	4.66633	32	21.99	1.32
Foretinib	SK-MES-1	1.54682	1.42469	4.69651	4.15658	11.5	7.9	0.885
Foretinib	SK-UT-1	1.84637	0.311298	6.33679	1.3652	78.46	83.14	0.215
Foretinib	SNU-387	0.194826	1.20754	1.2151	3.34525	175.31	519.8	2.753
Foretinib	SU-DHL-1	-1.97475	-0.460578	0.138795	0.630919	354.57	76.68	4.546
Foretinib	SW1088	-0.292207	0.900526	0.746614	2.4609	229.61	408.18	3.296
Foretinib	SW1116	1.31973	1.47217	3.74241	4.35869	16.47	11.55	1.165
Foretinib	SW1417	2.12394	1.28567	8.36399	3.6171	56.75	39.47	0.432
Foretinib	SW837	1.38301	1.28235	3.98689	3.60511	9.58	7.28	0.904
Foretinib	SW948	0.0502	0.142244	1.05148	1.15286	9.64	183.35	1.096
Foretinib	T84	0.367592	1.32297	1.44425	3.75456	159.97	259.9	2.6
Foretinib	TGBC11TKB	1.41712	0.591575	4.12521	1.80683	56.2	58.26	0.438
Foretinib	THP-1	1.00235	1.15701	2.72467	3.18042	16.73	15.43	1.167
Foretinib	OE33	-0.553611	0.577706	0.57487	1.78195	209.97	204.35	3.1
Foretinib	COLO-678	1.7102	1.56792	5.53005	4.79668	13.26	8.32	0.867
Foretinib	BFTC-909	0.86047	0.720014	2.36427	2.05446	13.1	16.32	0.869
Foretinib	AU565	1.07587	0.814263	2.93255	2.25751	23.02	24.32	0.77
Foretinib	BL-41	0.345601	-1.0979	1.41284	0.333573	76.39	417.68	0.236
Foretinib	SCC-15	1.04872	0.537735	2.854	1.71212	40.01	48.72	0.6
Foretinib	A101D	0.441549	0.286695	1.55511	1.33202	14.35	35.07	0.857
Foretinib	RERF-LC-MS	-1.01256	0.351414	0.363288	1.42108	291.17	134.71	3.912
Foretinib	AM-38	1.20037	0.453807	3.32133	1.57429	52.6	62.19	0.474
[truncated: 3,022 more rows]

## Sheet: DeepCDR_NCC5
DeepCDR_NCC5: Unknown Cell line split 5 prediction results
drug/compound	cell_line	Ln(IC50_expt)	Ln(IC50_pred)	IC50_expt (uM)	IC50_pred (uM)	% error IC50	% error LnIC50	Difference factor (for EVAPA)
50869	SBC-5	0.563604	1.49042	1.75699	4.43896	152.64	164.44	2.526
50869	HCC1954	0.695004	0.956236	2.00372	2.60188	29.85	37.59	1.299
50869	SK-MM-2	1.09772	1.11231	2.99732	3.04136	1.47	1.33	1.015
50869	D-283MED	0.613714	0.771797	1.84728	2.16365	17.13	25.76	1.171
50869	KYSE-180	1.00291	1.3555	2.72621	3.87868	42.27	35.16	1.423
50869	KYSE-510	0.669181	0.856339	1.95264	2.35452	20.58	27.97	1.206
50869	MDA-MB-468	0.987936	0.845865	2.68569	2.32999	13.24	14.38	0.868
50869	RS4-11	-0.093274	0.725936	0.910944	2.06666	126.87	878.28	2.269
50869	YH-13	0.924556	0.974944	2.52075	2.65102	5.17	5.45	1.052
50869	ST486	0.733264	0.588653	2.08186	1.80156	13.46	19.72	0.865
50869	A3-KAW	0.885131	0.696078	2.4233	2.00587	17.23	21.36	0.828
50869	MKN45	0.906338	0.948606	2.47524	2.58211	4.32	4.66	1.043
50869	SNU-398	1.02789	1.02617	2.79515	2.79036	0.17	0.17	0.998
50869	AMO-1	0.437547	0.763156	1.5489	2.14504	38.49	74.42	1.385
630600	SK-N-DZ	0.224427	0.38983	1.25161	1.47673	17.99	73.7	1.18
630600	Calu-6	0.625167	0.921342	1.86856	2.51266	34.47	47.38	1.345
630600	SHP-77	0.788226	0.81178	2.19949	2.25191	2.38	2.99	1.024
630600	EC-GI-10	0.334535	0.572594	1.39729	1.77286	26.88	71.16	1.269
630600	HCT-116	-0.029982	0.489202	0.970463	1.63101	68.07	1731.65	1.681
630600	SW620	0.318064	0.809859	1.37446	2.24759	63.52	154.62	1.635
630600	Daoy	0.84143	0.446624	2.31968	1.56303	32.62	46.92	0.674
630600	D-283MED	1.026	0.305359	2.78987	1.35711	51.36	70.24	0.486
630600	HSC-3	0.210781	0.605104	1.23464	1.83144	48.34	187.08	1.483
630600	L-428	0.715417	0.573149	2.04504	1.77384	13.26	19.89	0.867
630600	MDA-MB-468	0.558971	0.603514	1.74887	1.82853	4.55	7.97	1.046
630600	OPM-2	-0.724803	0.728388	0.48442	2.07174	327.67	200.49	4.277
630600	Raji	0.160295	0.719422	1.17386	2.05325	74.91	348.81	1.749
630600	RS4-11	0.822198	0.550406	2.2755	1.73396	23.8	33.06	0.762
630600	CA46	-0.156393	0.484053	0.855223	1.62264	89.73	409.51	1.897
630600	RPMI-7951	0.29946	0.835639	1.34913	2.30629	70.95	179.05	1.709
630600	ST486	-0.248146	0.342833	0.780246	1.40893	80.58	238.16	1.806
630600	BFTC-905	0.550776	0.525255	1.7346	1.69089	2.52	4.63	0.975
630600	A3-KAW	-0.84444	0.557275	0.429798	1.74591	306.22	165.99	4.062
630600	AMO-1	-1.51308	0.639905	0.22023	1.8963	761.05	142.29	8.611
630600	EJM	0.78722	0.865046	2.19728	2.37512	8.09	9.89	1.081
630600	WM793B	1.02181	0.500492	2.77821	1.64953	40.63	51.02	0.594
741909	SK-N-DZ	-0.223127	-0.648834	0.800013	0.522655	34.67	190.79	0.653
741909	SBC-5	-2.10508	-0.434166	0.121835	0.647805	431.7	79.38	5.317
741909	HCC1954	-1.6641	-0.165214	0.18936	0.847712	347.67	90.07	4.477
741909	A498	-1.94215	-0.930016	0.143395	0.394547	175.15	52.11	2.751
741909	IGROV-1	-0.327381	-0.877951	0.720809	0.415634	42.34	168.17	0.577
741909	COR-L105	-1.45591	-1.21142	0.233188	0.297773	27.7	16.79	1.277
741909	MDA-MB-468	-1.36554	-0.6525	0.255242	0.520742	104.02	52.22	2.04
741909	NCI-H28	-0.39496	0.392594	0.673707	1.48082	119.8	199.4	2.198
741909	RS4-11	-1.56196	-1.09399	0.209725	0.334879	59.68	29.96	1.597
741909	CCK-81	-0.481256	-1.0091	0.618007	0.364546	41.01	109.68	0.59
741909	AMO-1	-0.450955	-1.24576	0.63702	0.287723	54.83	176.25	0.452
741909	huH-1	-0.620766	-0.790383	0.537533	0.453671	15.6	27.32	0.844
741909	NUGC-4	-0.70069	-1.11634	0.496243	0.327477	34.01	59.32	0.66
743380	SK-N-DZ	-0.600567	-0.768728	0.548501	0.463602	15.48	28	0.845
743380	SBC-5	-1.86593	0.551103	0.154752	1.73517	1021.26	129.53	11.213
743380	HCC1954	-1.30099	-1.25534	0.272263	0.284978	4.67	3.51	1.047
743380	A498	-1.52098	-0.271302	0.218498	0.762386	248.92	82.16	3.489
743380	IGROV-1	-0.779879	-1.10751	0.458461	0.330382	27.94	42.01	0.721
743380	COR-L105	-1.31137	-0.619424	0.26945	0.538254	99.76	52.77	1.998
743380	D-283MED	-0.865047	-0.7605	0.421032	0.467432	11.02	12.09	1.11
743380	MDA-MB-468	-1.94712	-0.48006	0.142685	0.618746	333.64	75.35	4.336
743380	NCI-H28	-0.362833	0.065552	0.695702	1.06775	53.48	118.07	1.535
743380	RS4-11	-2.028	-1.28829	0.131598	0.275742	109.53	36.47	2.095
743380	CCK-81	-0.775527	-0.886903	0.460461	0.411929	10.54	14.36	0.895
743380	AMO-1	-1.13789	-1.20497	0.320495	0.2997	6.49	5.9	0.935
743380	huH-1	-0.536174	-0.792094	0.584982	0.452895	22.58	47.73	0.774
743380	NUGC-4	-1.03387	-0.48851	0.355627	0.61354	72.52	52.75	1.725
765771	HL-60	0.755518	2.69778	2.12871	14.8467	597.45	257.08	6.974
765771	K-562	1.00093	2.55697	2.72082	12.8967	374	155.46	4.74
765771	KYSE-510	0.554879	2.53033	1.74173	12.5576	620.99	356.01	7.21
776928	NCI-H1092	3.00078	3.02484	20.1011	20.5908	2.44	0.8	1.024
776928	SK-N-DZ	2.7563	2.97975	15.7415	19.683	25.04	8.11	1.25
776928	SBC-5	3.05436	3.13474	21.2076	22.9827	8.37	2.63	1.084
776928	NCI-H1792	3.04798	3.04197	21.0728	20.9465	0.6	0.2	0.994
776928	SHP-77	2.78978	3.19042	16.2775	24.2986	49.28	14.36	1.493
776928	HCC1143	3.03616	3.18206	20.8252	24.0962	15.71	4.81	1.157
776928	EC-GI-10	3.02039	3.1604	20.4993	23.5801	15.03	4.64	1.15
776928	SK-MM-2	3.2407	3.01263	25.5517	20.3408	20.39	7.04	0.796
776928	HCT-116	2.75415	3.0756	15.7077	21.663	37.91	11.67	1.379
776928	HL-60	2.99182	3.16426	19.922	23.6712	18.82	5.76	1.188
776928	SK-MEL-2	3.04654	3.15889	21.0424	23.5445	11.89	3.69	1.119
776928	OVCAR-4	3.24494	3.2766	25.6601	26.4855	3.22	0.98	1.032
776928	OVCAR-8	2.90765	3.16275	18.3137	23.6356	29.06	8.77	1.291
776928	647-V	3.10816	3.13132	22.3798	22.9043	2.34	0.75	1.023
776928	COLO-680N	2.99039	3.09141	19.8934	22.0081	10.63	3.38	1.106
776928	D-283MED	2.92671	3.16898	18.6662	23.7833	27.41	8.28	1.274
776928	Detroit562	2.85956	3.31598	17.4539	27.5493	57.84	15.96	1.578
776928	HGC-27	2.73517	3.22268	15.4124	25.0952	62.82	17.82	1.628
776928	HSC-3	2.96288	3.10517	19.3537	22.313	15.29	4.8	1.153
776928	HuCCT1	3.24704	3.13924	25.7141	23.0863	10.22	3.32	0.898
776928	KYSE-180	2.9185	3.12286	18.5134	22.7112	22.67	7	1.227
776928	KYSE-510	2.53744	3.21564	12.6473	24.9193	97.03	26.73	1.97
776928	L-428	2.93924	2.85484	18.9015	17.3716	8.09	2.87	0.919
776928	MDA-MB-468	2.72715	3.21634	15.2893	24.9368	63.1	17.94	1.631
776928	MKN1	3.14931	3.27994	23.3199	26.5742	13.96	4.15	1.14
776928	NCI-H716	2.87298	3.1942	17.6896	24.3907	37.88	11.18	1.379
776928	OPM-2	2.7189	3.29964	15.1636	27.103	78.74	21.36	1.787
776928	Raji	2.90906	2.88668	18.3396	17.9337	2.21	0.77	0.978
776928	RS4-11	2.78287	2.93696	16.1653	18.8584	16.66	5.54	1.167
776928	SW48	2.98149	3.08759	19.7171	21.9242	11.19	3.56	1.112
776928	KM-H2	2.89882	3.02074	18.1528	20.5064	12.97	4.21	1.13
776928	PSN1	2.7509	3.28656	15.6567	26.7507	70.86	19.47	1.709
776928	COLO-668	3.28069	3.40372	26.5942	30.0758	13.09	3.75	1.131
776928	BFTC-909	2.96556	3.51645	19.4056	33.6646	73.48	18.58	1.735
776928	CA46	3.27402	3.11749	26.4174	22.5897	14.49	4.78	0.855
776928	CAL-85-1	2.83426	3.33238	17.0178	28.0048	64.56	17.57	1.646
776928	RPMI-7951	2.76423	3.25365	15.8668	25.8846	63.14	17.71	1.631
776928	ST486	2.09326	3.01064	8.1113	20.3003	150.27	43.83	2.503
776928	23132-87	2.75759	3.11628	15.7617	22.5623	43.15	13.01	1.431
776928	BFTC-905	3.00743	3.21122	20.2352	24.8093	22.6	6.78	1.226
776928	A3-KAW	2.1559	2.98686	8.63562	19.8233	129.55	38.54	2.296
776928	HDLM-2	3.18388	3.20438	24.1402	24.6402	2.07	0.64	1.021
776928	LCLC-97TM1	2.85563	3.36909	17.3854	29.0521	67.11	17.98	1.671
776928	KYM-1	2.60864	3.17768	13.5806	23.9909	76.66	21.81	1.767
776928	SNU-398	2.60058	3.15347	13.4715	23.4171	73.83	21.26	1.738
776928	SUP-B15	2.92561	3.15263	18.6456	23.3975	25.49	7.76	1.255
776928	AMO-1	2.19666	3.01978	8.99488	20.4868	127.76	37.47	2.278
776928	EJM	3.05437	2.99811	21.2079	20.0477	5.47	1.84	0.945
776928	NUGC-4	3.04065	3.15561	20.9188	23.4673	12.18	3.78	1.122
776928	WM793B	2.88358	3.19666	17.8781	24.4507	36.76	10.86	1.368
776928	OCI-AML5	2.74245	3.18885	15.5249	24.2605	56.27	16.28	1.563
776928	SNU-C5	3.20444	3.191	24.6418	24.3127	1.34	0.42	0.987
5-azacytidine	SK-N-DZ	1.76575	1.76548	5.84594	5.84435	0.03	0.02	1
5-azacytidine	SBC-5	1.95429	2.77122	7.05891	15.9781	126.35	41.8	2.264
5-azacytidine	Calu-6	2.39203	2.59243	10.9357	13.3623	22.19	8.38	1.222
5-azacytidine	NCI-H1792	1.45845	2.26314	4.29928	9.61323	123.6	55.17	2.236
5-azacytidine	EC-GI-10	1.85928	2.06259	6.41912	7.86628	22.54	10.93	1.225
5-azacytidine	HCT-116	1.06893	2.01531	2.91225	7.50307	157.64	88.54	2.576
5-azacytidine	HL-60	0.917132	2.33205	2.5021	10.2991	311.62	154.28	4.116
5-azacytidine	K-562	1.5997	2.65202	4.95155	14.1826	186.43	65.78	2.864
5-azacytidine	A498	2.58368	2.31603	13.2458	10.1354	23.48	10.36	0.765
5-azacytidine	SK-MEL-2	2.66298	2.33835	14.339	10.3641	27.72	12.19	0.723
5-azacytidine	SW620	2.06274	2.82947	7.86747	16.9364	115.27	37.17	2.153
5-azacytidine	OVCAR-8	2.81827	2.87109	16.7478	17.6563	5.42	1.87	1.054
5-azacytidine	Daoy	2.13674	2.18773	8.47175	8.91496	5.23	2.39	1.052
5-azacytidine	D-283MED	0.71652	2.47011	2.0473	11.8238	477.53	244.74	5.775
5-azacytidine	Detroit562	1.91604	2.72779	6.79401	15.2991	125.19	42.37	2.252
5-azacytidine	G-361	2.2187	2.09889	9.19533	8.15714	11.29	5.4	0.887
5-azacytidine	HGC-27	1.41425	2.27369	4.11338	9.71514	136.18	60.77	2.362
5-azacytidine	HSC-3	2.18024	2.07893	8.84844	7.99595	9.63	4.65	0.904
5-azacytidine	KG-1	1.63231	1.89571	5.11566	6.65729	30.14	16.14	1.301
5-azacytidine	MDA-MB-468	0.887536	2.47904	2.42914	11.9298	391.11	179.32	4.911
5-azacytidine	OPM-2	1.4124	2.60115	4.10582	13.4793	228.3	84.16	3.283
5-azacytidine	P31-FUJ	1.63897	1.81337	5.14985	6.13109	19.05	10.64	1.191
5-azacytidine	Raji	2.6519	1.85708	14.1809	6.40499	54.83	29.97	0.452
5-azacytidine	RS4-11	1.85642	1.98998	6.40076	7.31536	14.29	7.19	1.143
5-azacytidine	SW48	1.2554	2.03251	3.50925	7.63322	117.52	61.9	2.175
5-azacytidine	TGBC11TKB	2.8796	1.98243	17.8071	7.26035	59.23	31.16	0.408
5-azacytidine	YH-13	2.65556	2.61521	14.2329	13.6701	3.95	1.52	0.96
5-azacytidine	KM-H2	2.52093	2.11255	12.4401	8.26931	33.53	16.2	0.665
5-azacytidine	PSN1	1.88434	2.56789	6.58204	13.0383	98.09	36.28	1.981
5-azacytidine	BFTC-909	2.70223	3.36764	14.9129	29.0099	94.53	24.62	1.945
5-azacytidine	CA46	1.78225	2.09537	5.94321	8.12842	36.77	17.57	1.368
5-azacytidine	RPMI-7951	1.60529	2.59367	4.9793	13.3788	168.69	61.57	2.687
5-azacytidine	ST486	1.02707	2.04125	2.79288	7.70024	175.71	98.74	2.757
5-azacytidine	23132-87	2.03221	2.1059	7.63095	8.21449	7.65	3.63	1.076
5-azacytidine	BFTC-905	1.61033	2.10548	5.00446	8.21108	64.08	30.75	1.641
5-azacytidine	A3-KAW	0.771779	1.81035	2.16361	6.11261	182.52	134.57	2.825
5-azacytidine	COR-L279	2.29614	2.33409	9.93577	10.3201	3.87	1.65	1.039
5-azacytidine	HDLM-2	2.28881	2.19367	9.86315	8.9681	9.07	4.16	0.909
5-azacytidine	MKN45	2.36892	1.98036	10.6859	7.24533	32.2	16.4	0.678
5-azacytidine	NCI-H810	2.08707	2.06876	8.06129	7.91499	1.81	0.88	0.982
5-azacytidine	LCLC-97TM1	1.23801	2.98511	3.44874	19.7888	473.8	141.12	5.738
5-azacytidine	CCK-81	1.84971	2.10245	6.35798	8.18621	28.75	13.66	1.288
5-azacytidine	KYM-1	1.61594	2.09891	5.03264	8.15726	62.09	29.89	1.621
5-azacytidine	PA-TU-8988T	2.9126	2.83605	18.4046	17.0482	7.37	2.63	0.926
5-azacytidine	SUP-B15	1.51477	2.39312	4.54837	10.9476	140.69	57.99	2.407
5-azacytidine	EJM	2.73585	2.19999	15.4229	9.0249	41.48	19.59	0.585
5-azacytidine	huH-1	2.37657	2.38518	10.7679	10.861	0.86	0.36	1.009
5-azacytidine	WM793B	2.28783	2.10245	9.85355	8.18619	16.92	8.1	0.831
5-azacytidine	OCI-AML5	2.04628	2.80941	7.73909	16.6001	114.5	37.29	2.145
5-azacytidine	SNU-C5	2.64379	2.03934	14.0664	7.68554	45.36	22.86	0.546
5-Fluorouracil	NCI-H1792	2.59581	2.69152	13.4074	14.754	10.04	3.69	1.1
5-Fluorouracil	HCT-116	2.71119	2.61376	15.0471	13.6503	9.28	3.59	0.907
5-Fluorouracil	HL-60	2.55893	2.81528	12.9219	16.6979	29.22	10.02	1.292
5-Fluorouracil	IGROV-1	3.37277	2.90893	29.1593	18.3371	37.11	13.75	0.629
5-Fluorouracil	D-283MED	1.9538	2.6764	7.05547	14.5326	105.98	36.98	2.06
5-Fluorouracil	HGC-27	3.29298	2.80625	26.923	16.5477	38.54	14.78	0.615
5-Fluorouracil	HuCCT1	3.14453	2.47271	23.2088	11.8545	48.92	21.36	0.511
5-Fluorouracil	IPC-298	2.53412	2.85217	12.6053	17.3253	37.44	12.55	1.374
5-Fluorouracil	KYSE-180	2.319	2.68043	10.1655	14.5914	43.54	15.59	1.435
5-Fluorouracil	OPM-2	3.4542	3.10416	31.6331	22.2904	29.53	10.13	0.705
5-Fluorouracil	RPMI-8402	3.0635	2.52823	21.4024	12.5314	41.45	17.47	0.586
5-Fluorouracil	RS4-11	2.22595	2.28742	9.26228	9.8495	6.34	2.76	1.063
5-Fluorouracil	THP-1	1.4979	2.3224	4.4723	10.2001	128.07	55.04	2.281
5-Fluorouracil	PSN1	1.35496	2.84651	3.87661	17.2275	344.4	110.08	4.444
5-Fluorouracil	CHP-126	1.31823	2.35342	3.73682	10.5215	181.56	78.53	2.816
5-Fluorouracil	RL	3.17601	2.16771	23.951	8.73822	63.52	31.75	0.365
5-Fluorouracil	23132-87	1.80734	2.60201	6.09422	13.4908	121.37	43.97	2.214
5-Fluorouracil	A3-KAW	-0.628819	2.4928	0.533221	12.095	2168.3	496.43	22.683
5-Fluorouracil	TE-11	2.98224	2.51654	19.732	12.3856	37.23	15.62	0.628
5-Fluorouracil	CCK-81	2.53669	2.69719	12.6378	14.838	17.41	6.33	1.174
5-Fluorouracil	KYM-1	3.46508	2.6639	31.979	14.3521	55.12	23.12	0.449
5-Fluorouracil	SUP-B15	2.1633	2.49442	8.69982	12.1147	39.25	15.31	1.393
5-Fluorouracil	AMO-1	1.91376	2.32017	6.77851	10.1774	50.14	21.24	1.501
5-Fluorouracil	WM793B	3.24748	2.59807	25.7254	13.4378	47.76	20	0.522
5-Fluorouracil	OCI-AML5	1.61952	2.57965	5.05069	13.1925	161.2	59.28	2.612
5-Fluorouracil	SNU-C5	3.12046	2.74455	22.6568	15.5577	31.33	12.05	0.687
Acetalax	HPAF-II	3.38422	2.02074	29.495	7.54389	74.42	40.29	0.256
Acetalax	HCC1954	-1.15608	1.86653	0.314717	6.46583	1954.49	261.45	20.545
Acetalax	HCC1143	3.25684	1.53813	25.9674	4.65586	82.07	52.77	0.179
Acetalax	EC-GI-10	-0.871045	1.81989	0.418514	6.17117	1374.54	308.93	14.745
Acetalax	TE-1	0.595856	1.78558	1.81458	5.96305	228.62	199.67	3.286
Acetalax	OVCAR-4	-0.41049	1.86459	0.663325	6.45332	872.87	554.24	9.729
Acetalax	HGC-27	2.66809	1.94471	14.4125	6.99164	51.49	27.11	0.485
Acetalax	KYSE-180	3.24592	2.08681	25.6853	8.05913	68.62	35.71	0.314
Acetalax	KYSE-510	3.11311	1.96823	22.4909	7.15796	68.17	36.78	0.318
Acetalax	MDA-MB-468	-0.218577	1.59829	0.803662	4.94458	515.26	831.23	6.153
Acetalax	MFE-296	-0.171384	1.54984	0.842498	4.71071	459.14	1004.31	5.591
Acetalax	NCI-N87	1.23146	1.43276	3.42624	4.19023	22.3	16.35	1.223
Acetalax	T84	2.22022	2.08251	9.20938	8.02459	12.87	6.2	0.871
Acetalax	YH-13	2.32884	1.37715	10.2661	3.96358	61.39	40.87	0.386
Acetalax	ZR-75-30	0.863553	1.96229	2.37157	7.11561	200.04	127.23	3
Acetalax	A204	-0.381648	1.55256	0.682735	4.72355	591.86	506.8	6.919
Acetalax	23132-87	0.647716	1.63747	1.91117	5.14216	169.06	152.81	2.691
Acetalax	MKN45	2.41768	1.57782	11.2199	4.8444	56.82	34.74	0.432
Acetalax	TE-9	0.282347	1.84821	1.32624	6.34845	378.68	554.59	4.787
Acetalax	CCK-81	3.21943	1.75635	25.0138	5.79127	76.85	45.45	0.232
Acetalax	KYM-1	-1.54343	1.76458	0.213647	5.83914	2633.08	214.33	27.331
Acetalax	NCI-H1568	1.22293	1.88539	3.39714	6.5889	93.95	54.17	1.94
Afatinib	NCI-H1650	1.79806	1.45782	6.03792	4.29659	28.84	18.92	0.712
Afatinib	NCI-H2052	1.5845	1.57916	4.87687	4.8509	0.53	0.34	0.995
Afatinib	SK-N-DZ	1.46638	1.8045	4.3335	6.07692	40.23	23.06	1.402
Afatinib	SBC-5	1.77928	1.52786	5.92561	4.6083	22.23	14.13	0.778
Afatinib	Calu-6	2.26569	1.95551	9.63774	7.06754	26.67	13.69	0.733
Afatinib	NCI-H1792	1.72948	1.81047	5.63771	6.11334	8.44	4.68	1.084
Afatinib	HPAF-II	2.15523	1.80385	8.62983	6.07301	29.63	16.3	0.704
Afatinib	SHP-77	1.19667	0.832032	3.30907	2.29798	30.56	30.47	0.694
Afatinib	HCC1954	1.89889	0.315329	6.67845	1.37071	79.48	83.39	0.205
Afatinib	HCC1143	1.77575	0.174477	5.90473	1.19062	79.84	90.17	0.202
Afatinib	EC-GI-10	-2.5249	1.88924	0.0800665	6.61436	8161.09	174.82	82.611
Afatinib	TE-1	0.913738	1.59111	2.49363	4.90918	96.87	74.13	1.969
Afatinib	HCT-116	1.49754	0.903883	4.47068	2.46917	44.77	39.64	0.552
Afatinib	HL-60	1.51857	1.41512	4.56568	4.11699	9.83	6.81	0.902
Afatinib	K-562	2.04016	1.21179	7.69182	3.35951	56.32	40.6	0.437
Afatinib	A498	1.40772	1.51183	4.08662	4.53503	10.97	7.4	1.11
Afatinib	SK-MEL-2	1.51397	0.887232	4.54472	2.4284	46.57	41.4	0.534
Afatinib	SW620	2.07825	2.12487	7.99047	8.37182	4.77	2.24	1.048
Afatinib	IGROV-1	-1.12535	1.24861	0.32454	3.48549	973.98	210.95	10.74
Afatinib	OVCAR-4	2.16386	1.48797	8.70467	4.42808	49.13	31.24	0.509
Afatinib	OVCAR-8	1.60766	1.74013	4.99114	5.69808	14.16	8.24	1.142
Afatinib	647-V	1.50028	1.85193	4.48294	6.37209	42.14	23.44	1.421
Afatinib	COR-L105	-3.13065	1.78228	0.0436893	5.9434	13503.8	156.93	136.038
Afatinib	Daoy	1.77665	0.885949	5.91	2.42529	58.96	50.13	0.41
Afatinib	D-283MED	1.27092	0.679582	3.56414	1.97305	44.64	46.53	0.554
Afatinib	Detroit562	0.361668	-1.26378	1.43572	0.282584	80.32	449.43	0.197
Afatinib	G-361	2.02173	1.43103	7.55138	4.18301	44.61	29.22	0.554
Afatinib	GCT	2.12414	1.65028	8.36567	5.20845	37.74	22.31	0.623
Afatinib	HGC-27	1.54493	1.23255	4.68766	3.42996	26.83	20.22	0.732
Afatinib	HSC-3	0.586564	-1.2655	1.7978	0.282099	84.31	315.75	0.157
Afatinib	HuCCT1	0.867996	1.88851	2.38213	6.60952	177.46	117.57	2.775
Afatinib	IPC-298	1.55393	1.35349	4.73004	3.87091	18.16	12.9	0.818
Afatinib	KG-1	1.66246	1.25185	5.27229	3.4968	33.68	24.7	0.663
Afatinib	KYSE-180	0.877176	2.18555	2.4041	8.89556	270.02	149.16	3.7
Afatinib	KYSE-510	1.73787	1.88591	5.68523	6.59232	15.96	8.52	1.16
Afatinib	L-428	1.06451	0.786798	2.89942	2.19635	24.25	26.09	0.758
Afatinib	MDA-MB-468	0.174724	1.34241	1.19092	3.82828	221.46	668.31	3.215
Afatinib	MKN1	0.870111	1.45742	2.38718	4.29488	79.91	67.5	1.799
Afatinib	NCI-N87	-5.75717	-0.494106	0.00316004	0.610116	19207.2	91.42	193.072
Afatinib	NCI-H358	-0.549402	2.27498	0.577295	9.72775	1585.06	514.08	16.851
Afatinib	NCI-H28	1.76689	2.09059	5.85264	8.08965	38.22	18.32	1.382
Afatinib	OPM-2	1.77814	0.319408	5.91887	1.37631	76.75	82.04	0.233
Afatinib	P31-FUJ	0.344067	1.24098	1.41067	3.45899	145.2	260.68	2.452
Afatinib	Raji	1.37071	0.911352	3.93815	2.48768	36.83	33.51	0.632
Afatinib	RPMI-8402	0.360576	1.37005	1.43416	3.93554	174.42	279.96	2.744
Afatinib	RS4-11	1.05498	1.45663	2.87191	4.29146	49.43	38.07	1.494
Afatinib	SJSA-1	1.74711	1.6589	5.738	5.25355	8.44	5.05	0.916
Afatinib	SW48	0.266556	1.35389	1.30546	3.87244	196.63	407.92	2.966
Afatinib	TGBC11TKB	1.42594	1.01217	4.16178	2.75158	33.88	29.02	0.661
Afatinib	THP-1	0.641912	0.07622	1.90011	1.0792	43.2	88.13	0.568
Afatinib	YH-13	1.90525	-1.46501	6.72106	0.231076	96.56	176.89	0.034
Afatinib	ZR-75-30	-1.75956	1.70201	0.172121	5.48498	3086.7	196.73	31.867
Afatinib	RCC10RGB	1.20721	1.18932	3.34413	3.28483	1.77	1.48	0.982
Afatinib	KM-H2	1.52364	1.77497	4.58891	5.90012	28.57	16.5	1.286
Afatinib	CHP-126	1.63779	1.4931	5.14379	4.45089	13.47	8.83	0.865
Afatinib	BFTC-909	1.41795	1.19687	4.12863	3.30974	19.83	15.59	0.802
Afatinib	CA46	1.34323	1.47282	3.83138	4.36151	13.84	9.65	1.138
Afatinib	A204	1.79442	1.35371	6.016	3.87175	35.64	24.56	0.644
Afatinib	RL	1.24176	0.968069	3.46169	2.63285	23.94	22.04	0.761
Afatinib	RPMI-7951	1.76259	0.777563	5.82752	2.17616	62.66	55.89	0.373
Afatinib	ST486	0.482309	1.22001	1.61981	3.38721	109.11	152.95	2.091
Afatinib	23132-87	1.16022	1.31031	3.19063	3.70731	16.19	12.94	1.162
Afatinib	BFTC-905	1.22481	1.23574	3.40351	3.44092	1.1	0.89	1.011
Afatinib	A3-KAW	0.505442	1.62426	1.65772	5.07467	206.12	221.35	3.061
Afatinib	COR-L279	0.9995	1.93267	2.71692	6.9079	154.25	93.36	2.543
Afatinib	HDLM-2	1.26001	1.53985	3.52544	4.66391	32.29	22.21	1.323
Afatinib	NCI-H810	2.22683	1.77525	9.27046	5.90177	36.34	20.28	0.637
Afatinib	PANC-10-05	2.2898	1.64063	9.87299	5.15844	47.75	28.35	0.522
Afatinib	TE-11	0.60721	0.73788	1.8353	2.0915	13.96	21.52	1.14
Afatinib	LCLC-97TM1	1.16037	1.9466	3.19111	7.00481	119.51	67.76	2.195
Afatinib	CCK-81	-2.49883	1.63932	0.0821813	5.15164	6168.63	165.6	62.686
Afatinib	KYM-1	1.49354	1.37861	4.45285	3.96936	10.86	7.7	0.891
Afatinib	PA-TU-8988T	1.91472	1.95937	6.78504	7.09483	4.57	2.33	1.046
Afatinib	SNU-398	1.25644	1.30717	3.51291	3.69569	5.2	4.04	1.052
Afatinib	SUP-B15	1.79688	1.26169	6.03081	3.5314	41.44	29.78	0.586
Afatinib	AMO-1	0.765995	1.59742	2.15113	4.94029	129.66	108.54	2.297
Afatinib	EJM	1.7741	1.57513	5.895	4.83138	18.04	11.22	0.82
Afatinib	NCI-H1568	0.400136	1.57447	1.49203	4.8282	223.6	293.48	3.236
Afatinib	NUGC-4	0.514003	1.54095	1.67197	4.66901	179.25	199.79	2.793
Afatinib	WM793B	1.51227	1.59333	4.53704	4.92011	8.44	5.36	1.084
Afatinib	OCI-AML5	1.05191	0.923316	2.86311	2.51763	12.07	12.22	0.879
Afatinib	SNU-C5	2.0618	1.2883	7.86013	3.62662	53.86	37.52	0.461
Afuresertib	ChaGo-K-1	2.21376	1.46329	9.15008	4.32017	52.79	33.9	0.472
Afuresertib	SBC-5	1.91386	1.42169	6.7792	4.14411	38.87	25.72	0.611
Afuresertib	HCC1954	1.62842	1.12495	5.09583	3.08007	39.56	30.92	0.604
Afuresertib	HCC1599	1.76286	1.30734	5.82907	3.69632	36.59	25.84	0.634
Afuresertib	EC-GI-10	1.61937	1.47612	5.0499	4.37595	13.35	8.85	0.867
Afuresertib	SK-MM-2	2.14193	1.68505	8.51586	5.39272	36.67	21.33	0.633
Afuresertib	HCT-116	2.151	1.33894	8.59347	3.81499	55.61	37.75	0.444
Afuresertib	A498	0.201604	1.66656	1.22336	5.29391	332.73	726.65	4.327
Afuresertib	SK-MEL-5	1.84167	1.2208	6.30709	3.38991	46.25	33.71	0.537
Afuresertib	IGROV-1	-1.56712	1.4832	0.208645	4.40703	2012.21	194.64	21.122
Afuresertib	SF295	0.71041	1.77808	2.03483	5.9185	190.86	150.29	2.909
Afuresertib	COR-L105	2.12893	1.84962	8.40583	6.35742	24.37	13.12	0.756
Afuresertib	D-283MED	2.20108	1.30391	9.03478	3.68368	59.23	40.76	0.408
Afuresertib	Detroit562	1.52562	1.55583	4.59798	4.739	3.07	1.98	1.031
Afuresertib	HGC-27	-1.6283	1.38549	0.196262	3.9968	1936.46	185.09	20.365
Afuresertib	HSC-3	1.25372	1.07911	3.50336	2.94205	16.02	13.93	0.84
Afuresertib	KYSE-180	1.92032	2.10585	6.82313	8.21407	20.39	9.66	1.204
Afuresertib	L-428	2.26368	0.751525	9.61845	2.12023	77.96	66.8	0.22
Afuresertib	MDA-MB-468	1.4359	1.31382	4.20344	3.72037	11.49	8.5	0.885
Afuresertib	MEL-HO	0.944746	1.46048	2.57216	4.30804	67.49	54.59	1.675
Afuresertib	MFE-296	1.48519	1.15349	4.41579	3.16923	28.23	22.33	0.718
Afuresertib	MKN1	2.13585	1.76876	8.46422	5.86359	30.72	17.19	0.693
Afuresertib	NCI-H716	2.22589	1.37382	9.26177	3.95041	57.35	38.28	0.427
Afuresertib	NCI-N87	2.05602	0.783984	7.81479	2.19018	71.97	61.87	0.28
Afuresertib	OPM-2	-0.042964	1.37184	0.957946	3.94259	311.57	3292.99	4.116
Afuresertib	P31-FUJ	0.069608	0.994544	1.07209	2.70349	152.17	1328.78	2.522
Afuresertib	RPMI-8402	-0.699707	1.50119	0.496731	4.48703	803.31	314.55	9.033
Afuresertib	RS4-11	1.54801	1.18986	4.70211	3.28662	30.1	23.14	0.699
Afuresertib	SW1088	1.80837	1.45468	6.10048	4.28311	29.79	19.56	0.702
Afuresertib	SW48	1.33243	1.3517	3.79025	3.86399	1.95	1.45	1.019
Afuresertib	T84	1.76059	1.81235	5.81586	6.12484	5.31	2.94	1.053
Afuresertib	THP-1	1.13072	0.99471	3.09789	2.70394	12.72	12.03	0.873
Afuresertib	COLO-668	1.89267	1.88606	6.63704	6.59332	0.66	0.35	0.993
Afuresertib	BFTC-909	1.1116	1.98354	3.03921	7.26841	139.16	78.44	2.392
Afuresertib	CA46	1.60669	1.28449	4.98629	3.61282	27.54	20.05	0.725
Afuresertib	A204	1.79673	1.84071	6.0299	6.30101	4.5	2.45	1.045
Afuresertib	RL	1.98608	0.235414	7.28693	1.26543	82.63	88.15	0.174
Afuresertib	RPMI-7951	1.72281	1.23185	5.60024	3.42755	38.8	28.5	0.612
Afuresertib	ST486	2.26143	1.16259	9.59676	3.19822	66.67	48.59	0.333
Afuresertib	23132-87	0.889532	1.21345	2.43399	3.36506	38.25	36.41	1.383
Afuresertib	COR-L279	1.52189	1.60965	4.5809	5.00108	9.17	5.77	1.092
Afuresertib	HDLM-2	2.03721	1.21045	7.6692	3.35499	56.25	40.58	0.437
Afuresertib	MKN45	1.42518	1.68446	4.15862	5.38953	29.6	18.19	1.296
Afuresertib	TE-11	1.78579	1.11528	5.96429	3.05041	48.86	37.55	0.511
Afuresertib	CCK-81	2.21762	1.32617	9.18543	3.76657	58.99	40.2	0.41
Afuresertib	EN	0.59918	1.21482	1.82063	3.3697	85.08	102.75	1.851
Afuresertib	AMO-1	0.795538	1.33754	2.21563	3.80967	71.94	68.13	1.719
Afuresertib	WM793B	2.20862	1.38528	9.10315	3.99593	56.1	37.28	0.439
Afuresertib	SNU-C5	1.88691	1.39713	6.59898	4.04358	38.72	25.96	0.613
AGI-6780	SNU-398	1.77908	2.44048	5.92438	11.4786	93.75	37.18	1.938
AGI-6780	AMO-1	1.71719	2.45483	5.56884	11.6444	109.1	42.96	2.091
AGK2	Detroit562	0.999052	2.01032	2.71571	7.46574	174.91	101.22	2.749
AGK2	A3-KAW	0.930342	1.65632	2.53538	5.24002	106.68	78.03	2.067
Alisertib	NCI-H1650	2.17545	0.357072	8.80611	1.42914	83.77	83.59	0.162
Alisertib	NCI-H1092	1.75815	-0.419861	5.80171	0.657138	88.67	123.88	0.113
Alisertib	SK-N-DZ	-3.1671	-1.16662	0.0421257	0.311417	639.26	63.16	7.393
Alisertib	SBC-5	1.2604	1.56869	3.52682	4.80035	36.11	24.46	1.361
Alisertib	Calu-6	1.74394	1.25584	5.71986	3.51079	38.62	27.99	0.614
Alisertib	NCI-H1792	0.904998	1.67403	2.47193	5.33364	115.77	84.98	2.158
Alisertib	EC-GI-10	1.97194	0.387175	7.18463	1.47281	79.5	80.37	0.205
Alisertib	SK-MM-2	-0.010548	0.547397	0.989507	1.72875	74.71	5289.58	1.747
Alisertib	TE-1	1.74715	0.557532	5.73824	1.74636	69.57	68.09	0.304
Alisertib	HCT-116	0.522886	0.283779	1.68689	1.32814	21.27	45.73	0.787
Alisertib	HL-60	-1.11491	1.64943	0.327944	5.20401	1486.86	247.94	15.869
Alisertib	K-562	2.04994	-0.217651	7.76741	0.804406	89.64	110.62	0.104
Alisertib	SW620	1.86756	1.08322	6.4725	2.95419	54.36	42	0.456
Alisertib	IGROV-1	1.3062	0.836203	3.69212	2.30759	37.5	35.98	0.625
Alisertib	SF295	0.446286	1.84781	1.5625	6.34592	306.14	314.04	4.061
Alisertib	OVCAR-8	1.22002	0.16901	3.38725	1.18413	65.04	86.15	0.35
Alisertib	D-283MED	0.116545	0.447896	1.12361	1.56502	39.28	284.31	1.393
Alisertib	Detroit562	-1.25025	1.79113	0.286433	5.99622	1993.41	243.26	20.934
Alisertib	HGC-27	-1.6742	1.26002	0.187458	3.52551	1780.69	175.26	18.807
Alisertib	HSC-3	0.925284	0.291116	2.52258	1.33792	46.96	68.54	0.53
Alisertib	HuCCT1	2.06977	0.383844	7.92301	1.46792	81.47	81.45	0.185
Alisertib	IPC-298	2.1668	0.264894	8.73028	1.30329	85.07	87.77	0.149
Alisertib	KG-1	0.570172	-1.05915	1.76857	0.346749	80.39	285.76	0.196
Alisertib	MDA-MB-468	-1.82391	0.513024	0.161393	1.67033	934.95	128.13	10.349
Alisertib	MKN1	0.628304	0.547978	1.87443	1.72975	7.72	12.78	0.923
Alisertib	NCI-H716	0.318605	1.52966	1.37521	4.61659	235.7	380.11	3.357
Alisertib	OPM-2	-0.404305	-0.780787	0.667441	0.458045	31.37	93.12	0.686
Alisertib	P31-FUJ	-1.83261	-0.441965	0.159995	0.642772	301.75	75.88	4.017
Alisertib	RPMI-8402	-2.23593	-1.18468	0.106893	0.305845	186.12	47.02	2.861
Alisertib	RS4-11	-3.33934	-1.08458	0.0354605	0.338043	853.3	67.52	9.533
Alisertib	SW1088	0.474095	1.31077	1.60656	3.70902	130.87	176.48	2.309
Alisertib	SW48	-2.99433	0.047652	0.0500701	1.04881	1994.68	101.59	20.947
Alisertib	T84	1.39398	2.05907	4.03085	7.83868	94.47	47.71	1.945
Alisertib	YH-13	-0.098944	0.605049	0.905793	1.83134	102.18	711.51	2.022
Alisertib	KM-H2	0.763283	-0.531281	2.14531	0.587851	72.6	169.6	0.274
Alisertib	CHP-126	-2.28284	-1.61077	0.101994	0.199733	95.83	29.44	1.958
Alisertib	BFTC-909	2.12135	1.51472	8.34237	4.54816	45.48	28.6	0.545
Alisertib	RL	-2.62943	0.684694	0.0721197	1.98316	2649.82	126.04	27.498
Alisertib	RPMI-7951	0.8439	1.32182	2.32542	3.75023	61.27	56.63	1.613
Alisertib	ST486	-2.17536	-0.841252	0.113567	0.431171	279.66	61.33	3.797
Alisertib	BFTC-905	0.260749	0.908275	1.2979	2.48004	91.08	248.33	1.911
Alisertib	A3-KAW	-1.94104	0.435766	0.143554	1.54615	977.05	122.45	10.771
Alisertib	COR-L279	-2.61754	1.2061	0.0729822	3.34042	4477.03	146.08	45.77
Alisertib	NCI-H810	0.21561	-0.903621	1.24062	0.4051	67.35	519.1	0.327
Alisertib	TE-11	-2.886	-0.560039	0.0557987	0.571187	923.66	80.59	10.237
Alisertib	LCLC-97TM1	0.537305	1.7328	1.71139	5.6565	230.52	222.5	3.305
Alisertib	EN	0.589235	0.032406	1.80261	1.03294	42.7	94.5	0.573
Alisertib	KYM-1	-0.356443	1.39846	0.700162	4.04895	478.29	492.34	5.783
Alisertib	SNU-398	0.080326	-0.390744	1.08364	0.676553	37.57	586.45	0.624
Alisertib	SUP-B15	-3.35153	-2.04215	0.0350309	0.12975	270.39	39.07	3.704
Alisertib	AMO-1	-2.86636	-1.0266	0.0569056	0.358221	529.5	64.18	6.295
Alisertib	huH-1	2.23161	0.943707	9.31487	2.56949	72.42	57.71	0.276
Alisertib	WM793B	1.35964	-0.10901	3.89479	0.896721	76.98	108.02	0.23
Alisertib	OCI-AML5	-0.454013	-2.14988	0.635075	0.116498	81.66	373.53	0.183
Alisertib	SNU-C5	1.92417	0.553196	6.84945	1.7388	74.61	71.25	0.254
Alpelisib	HCC1954	1.47943	1.44636	4.39045	4.24762	3.25	2.24	0.967
Alpelisib	HCC1599	1.94026	1.58752	6.96053	4.89162	29.72	18.18	0.703
Alpelisib	HL-60	2.21634	1.74927	9.17369	5.7504	37.32	21.07	0.627
Alpelisib	IGROV-1	-0.682052	1.7767	0.505578	5.91031	1069.02	360.49	11.69
Alpelisib	Detroit562	2.20694	1.755	9.08787	5.78347	36.36	20.48	0.636
Alpelisib	HGC-27	0.38556	1.58103	1.47044	4.85996	230.51	310.06	3.305
Alpelisib	MKN1	1.55835	1.91209	4.75097	6.7672	42.44	22.7	1.424
Alpelisib	NCI-N87	0.361294	1.4025	1.43519	4.06534	183.26	288.19	2.833
Alpelisib	RPMI-8402	1.4097	1.77717	4.09471	5.91311	44.41	26.07	1.444
Alpelisib	RS4-11	2.1559	1.51874	8.63569	4.56647	47.12	29.55	0.529
Alpelisib	SW48	1.96969	1.61989	7.16849	5.05255	29.52	17.76	0.705
Alpelisib	T84	1.97114	1.52175	7.17884	4.58024	36.2	22.8	0.638
Alpelisib	THP-1	1.44122	1.42298	4.22583	4.14948	1.81	1.27	0.982
Alpelisib	BFTC-909	1.79572	1.99161	6.02382	7.32734	21.64	10.91	1.216
Alpelisib	23132-87	1.93901	1.62695	6.95184	5.08833	26.81	16.09	0.732
Alpelisib	TE-11	0.68051	1.56435	1.97488	4.77955	142.02	129.88	2.42
Alpelisib	CCK-81	2.19997	1.75658	9.02474	5.7926	35.81	20.15	0.642
Alpelisib	AMO-1	1.37326	1.49924	3.9482	4.47828	13.43	9.17	1.134
AMG-319	RPMI-8402	2.13618	1.4578	8.46706	4.29651	49.26	31.76	0.507
AMG-319	THP-1	2.00335	1.365	7.41388	3.9157	47.18	31.86	0.528
ascorbate (vitamin C)	L-428	7.22509	7.5912	1373.46	1980.7	44.21	5.07	1.442
ascorbate (vitamin C)	RPMI-7951	7.54563	7.23726	1892.45	1390.28	26.54	4.09	0.735
ascorbate (vitamin C)	A3-KAW	6.95656	7.16383	1050.02	1291.85	23.03	2.98	1.23
AT13148	HCC1954	2.15711	1.61943	8.64612	5.05019	41.59	24.93	0.584
AT13148	HCT-116	2.25977	1.57231	9.58087	4.81777	49.71	30.42	0.503
AT13148	IGROV-1	0.746257	1.78309	2.10909	5.94821	182.03	138.94	2.82
AT13148	D-283MED	1.47277	1.62446	4.36132	5.07569	16.38	10.3	1.164
AT13148	Detroit562	1.01347	1.80887	2.75515	6.10357	121.53	78.48	2.215
AT13148	GCT	0.825925	1.92551	2.28399	6.85861	200.29	133.13	3.003
AT13148	HGC-27	1.36022	1.88082	3.89705	6.55891	68.3	38.27	1.683
AT13148	HSC-3	1.05531	1.50061	2.87287	4.4844	56.09	42.2	1.561
AT13148	NCI-N87	1.23032	1.47089	3.42233	4.35313	27.2	19.55	1.272
AT13148	OPM-2	2.14775	1.83411	8.56555	6.25956	26.92	14.6	0.731
AT13148	P31-FUJ	-0.553594	1.3496	0.57488	3.85587	570.73	343.79	6.707
AT13148	RPMI-8402	1.32096	1.57106	3.74702	4.81173	28.41	18.93	1.284
AT13148	SW1088	1.84817	1.69017	6.34817	5.4204	14.61	8.55	0.854
AT13148	THP-1	1.87649	1.56871	6.53057	4.80046	26.49	16.4	0.735
AT13148	BFTC-909	1.45337	1.90583	4.27748	6.72499	57.22	31.13	1.572
AT13148	RPMI-7951	0.885648	1.78258	2.42455	5.94519	145.21	101.27	2.452
AT13148	ST486	0.856254	1.54756	2.35432	4.69998	99.63	80.74	1.996
AT13148	23132-87	1.36364	1.64069	3.91042	5.15874	31.92	20.32	1.319
AT13148	A3-KAW	1.76841	1.62237	5.8615	5.06509	13.59	8.26	0.864
AT13148	NCI-H810	2.1837	1.59353	8.8791	4.92109	44.58	27.03	0.554
AT13148	TE-11	1.31889	1.66219	3.73926	5.27085	40.96	26.03	1.41
AT13148	SUP-B15	1.82202	1.69004	6.18436	5.4197	12.36	7.24	0.876
AT13148	AMO-1	0.862373	1.77637	2.36878	5.90839	149.43	105.99	2.494
AT13148	WM793B	1.74023	1.54467	5.69867	4.68644	17.76	11.24	0.822
Avagacestat	RPMI-8402	1.73084	2.4859	5.64537	12.0119	112.77	43.62	2.128
Axitinib	SK-N-DZ	0.803027	1.65575	2.23229	5.23702	134.6	106.19	2.346
Axitinib	SBC-5	2.04323	2.15035	7.71551	8.58783	11.31	5.24	1.113
Axitinib	SHP-77	2.2496	1.99946	9.48398	7.38504	22.13	11.12	0.779
Axitinib	HL-60	1.34691	2.22709	3.84554	9.27286	141.13	65.35	2.411
Axitinib	K-562	-0.146775	2.00626	0.863488	7.43549	761.1	1466.9	8.611
Axitinib	D-283MED	1.27005	1.65661	3.56104	5.24153	47.19	30.44	1.472
Axitinib	Detroit562	1.44837	1.96954	4.25619	7.16739	68.4	35.98	1.684
Axitinib	HGC-27	1.39827	2.20829	4.04818	9.10018	124.8	57.93	2.248
Axitinib	KG-1	0.104522	1.52336	1.11018	4.58762	313.23	1357.46	4.132
Axitinib	L-428	2.2148	1.62604	9.1596	5.08371	44.5	26.58	0.555
Axitinib	MDA-MB-468	0.869783	1.77861	2.38639	5.9216	148.14	104.49	2.481
Axitinib	NCI-H716	0.108462	2.03253	1.11456	7.63337	584.88	1773.96	6.849
Axitinib	OPM-2	1.24873	1.81851	3.4859	6.16268	76.79	45.63	1.768
Axitinib	P31-FUJ	-0.53924	1.45042	0.583191	4.26491	631.3	368.97	7.313
Axitinib	RPMI-8402	0.553349	1.51732	1.73907	4.55998	162.21	174.21	2.622
Axitinib	RS4-11	0.407998	1.60803	1.5038	4.99295	232.02	294.13	3.32
Axitinib	SW1088	1.70464	2.11873	5.49942	8.32055	51.3	24.29	1.513
Axitinib	SW48	0.524563	1.7884	1.68972	5.97989	253.9	240.93	3.539
Axitinib	THP-1	2.18866	1.52329	8.92321	4.58729	48.59	30.4	0.514
Axitinib	KM-H2	1.99368	1.65831	7.34248	5.25043	28.49	16.82	0.715
Axitinib	CHP-126	1.45625	1.86179	4.28986	6.43524	50.01	27.85	1.5
Axitinib	A204	-0.793968	1.38749	0.452048	4.00479	785.92	274.75	8.859
Axitinib	RL	1.85962	1.3268	6.42132	3.76896	41.31	28.65	0.587
Axitinib	ST486	0.0899	1.69621	1.09406	5.45325	398.44	1786.78	4.984
Axitinib	A3-KAW	1.04856	1.72728	2.85353	5.62534	97.14	64.73	1.971
Axitinib	COR-L279	1.13862	1.97738	3.12245	7.22379	131.35	73.66	2.313
Axitinib	NCI-H810	2.17143	1.69511	8.77085	5.44725	37.89	21.94	0.621
Axitinib	TE-11	0.808029	1.45747	2.24348	4.29507	91.45	80.37	1.914
Axitinib	EN	2.06299	1.67557	7.86947	5.34183	32.12	18.78	0.679
Axitinib	SNU-398	2.05058	1.92917	7.77239	6.88383	11.43	5.92	0.886
Axitinib	SUP-B15	-0.215838	0.836758	0.805866	2.30887	186.51	487.68	2.865
Axitinib	OCI-AML5	1.36172	1.19076	3.90289	3.28957	15.71	12.55	0.843
AZ6102	NCI-H2052	2.04606	1.6248	7.73736	5.0774	34.38	20.59	0.656
AZ6102	SK-N-DZ	2.00914	1.39261	7.45689	4.02533	46.02	30.69	0.54
AZ6102	SBC-5	2.09206	1.51163	8.10157	4.53412	44.03	27.74	0.56
AZ6102	EC-GI-10	2.18358	1.45798	8.878	4.29726	51.6	33.23	0.484
AZ6102	A498	2.25695	1.45309	9.55386	4.2763	55.24	35.62	0.448
AZ6102	IGROV-1	0.476138	1.38906	1.60985	4.01109	149.16	191.74	2.492
AZ6102	OVCAR-8	2.16628	1.5425	8.72575	4.67625	46.41	28.8	0.536
AZ6102	647-V	1.90907	1.81816	6.74682	6.16052	8.69	4.76	0.913
AZ6102	Daoy	1.76599	1.24065	5.84736	3.45787	40.86	29.75	0.591
AZ6102	Detroit562	1.12347	1.344	3.07551	3.83434	24.67	19.63	1.247
AZ6102	G-361	1.69778	1.41975	5.46178	4.13609	24.27	16.38	0.757
AZ6102	HGC-27	1.4969	1.67614	4.46781	5.34491	19.63	11.97	1.196
AZ6102	HuH-7	2.28966	1.33051	9.87159	3.78297	61.68	41.89	0.383
AZ6102	KG-1	1.69332	1.16646	5.43748	3.21059	40.95	31.11	0.59
AZ6102	KYSE-180	2.10988	1.53196	8.24728	4.62723	43.89	27.39	0.561
AZ6102	KYSE-510	2.10862	1.51796	8.23685	4.56289	44.6	28.01	0.554
AZ6102	MDA-MB-468	1.35749	1.37643	3.88642	3.96072	1.91	1.39	1.019
AZ6102	NCI-H716	2.03449	1.65222	7.64837	5.21854	31.77	18.79	0.682
AZ6102	NCI-N87	2.08366	0.972906	8.03384	2.64562	67.07	53.31	0.329
AZ6102	OPM-2	1.98413	1.35627	7.27272	3.88169	46.63	31.64	0.534
AZ6102	Raji	1.7023	1.30155	5.48653	3.675	33.02	23.54	0.67
AZ6102	RPMI-8402	1.85237	1.37019	6.37491	3.93609	38.26	26.03	0.617
AZ6102	RS4-11	1.68769	1.30464	5.407	3.68635	31.82	22.7	0.682
AZ6102	CHP-126	2.20086	1.66832	9.03281	5.30327	41.29	24.2	0.587
AZ6102	BFTC-909	1.33195	1.47904	3.78843	4.38874	15.85	11.04	1.158
AZ6102	CA46	1.70715	1.21348	5.51323	3.36518	38.96	28.92	0.61
AZ6102	RL	1.94681	1.24497	7.00629	3.47282	50.43	36.05	0.496
AZ6102	RPMI-7951	1.71461	1.41929	5.55451	4.13419	25.57	17.22	0.744
AZ6102	ST486	1.80168	1.30349	6.05984	3.68211	39.24	27.65	0.608
AZ6102	23132-87	1.98376	1.32016	7.27	3.74403	48.5	33.45	0.515
AZ6102	BFTC-905	1.49433	1.20673	4.45637	3.34252	24.99	19.25	0.75
AZ6102	A3-KAW	1.01964	1.59221	2.77219	4.91462	77.28	56.15	1.773
AZ6102	COR-L279	2.07812	1.44458	7.98943	4.24006	46.93	30.49	0.531
AZ6102	MKN45	2.29907	1.42705	9.96495	4.16641	58.19	37.93	0.418
AZ6102	TE-11	1.33102	1.22589	3.78489	3.4072	9.98	7.9	0.9
AZ6102	KYM-1	1.19112	1.6557	3.29078	5.23672	59.13	39	1.591
AZ6102	SUP-B15	1.87256	1.30736	6.50491	3.69639	43.18	30.18	0.568
AZ6102	AMO-1	1.35067	1.50424	3.86003	4.50075	16.6	11.37	1.166
AZ6102	OCUM-1	1.84918	1.83767	6.35462	6.28186	1.14	0.62	0.989
AZ6102	WM793B	1.88267	1.3168	6.57104	3.73147	43.21	30.06	0.568
AZ6102	OCI-AML5	1.62663	1.34981	5.08669	3.85669	24.18	17.02	0.758
AZ6102	OV-56	2.08792	1.37708	8.06815	3.96333	50.88	34.05	0.491
AZ960	SK-N-DZ	1.08175	0.315173	2.94985	1.3705	53.54	70.86	0.465
AZ960	SBC-5	0.378978	1.61652	1.46079	5.03552	244.71	326.55	3.447
AZ960	Calu-6	1.92213	1.62844	6.8355	5.09594	25.45	15.28	0.746
AZ960	NCI-H1792	0.141028	1.76806	1.15146	5.85947	408.87	1153.69	5.089
AZ960	SHP-77	1.48472	1.43026	4.41372	4.1798	5.3	3.67	0.947
AZ960	HCC1599	1.49611	1.07334	4.46431	2.92514	34.48	28.26	0.655
AZ960	EC-GI-10	1.60364	0.890518	4.97112	2.43639	50.99	44.47	0.49
AZ960	SK-MM-2	0.106447	1.14167	1.11232	3.13201	181.57	972.53	2.816
AZ960	TE-1	2.20965	1.52457	9.11252	4.59317	49.59	31	0.504
AZ960	HCT-116	0.273473	1.17691	1.31452	3.24433	146.81	330.36	2.468
AZ960	HL-60	0.054884	1.82949	1.05642	6.23071	489.8	3233.38	5.898
AZ960	K-562	2.26667	0.97493	9.64722	2.65098	72.52	56.99	0.275
AZ960	SW620	1.08583	1.66425	2.96189	5.28172	78.32	53.27	1.783
AZ960	IGROV-1	1.06825	1.44738	2.91029	4.25198	46.1	35.49	1.461
AZ960	SF295	1.88539	1.55202	6.5889	4.72101	28.35	17.68	0.717
AZ960	Daoy	0.71724	1.56056	2.04877	4.76151	132.41	117.58	2.324
AZ960	D-283MED	-0.01052	1.44518	0.989535	4.2426	328.75	13837.4	4.287
AZ960	Detroit562	0.471084	1.9244	1.60173	6.85106	327.73	308.51	4.277
AZ960	GCT	1.48682	1.78229	4.42303	5.94345	34.38	19.87	1.344
AZ960	HSC-3	0.775859	1.28118	2.17246	3.60087	65.75	65.13	1.658
AZ960	IPC-298	1.77958	1.24706	5.92737	3.48008	41.29	29.92	0.587
AZ960	KG-1	0.418451	0.678864	1.51961	1.97164	29.75	62.23	1.297
AZ960	MDA-MB-468	1.24914	1.13333	3.48736	3.10598	10.94	9.27	0.891
AZ960	NCI-H716	-0.141055	1.5724	0.868442	4.81821	454.81	1214.74	5.548
AZ960	NCI-H358	1.48635	1.2115	4.42092	3.35853	24.03	18.49	0.76
AZ960	NCI-H28	2.28345	1.81273	9.81049	6.12713	37.55	20.61	0.625
AZ960	OPM-2	-0.00282	1.25619	0.997184	3.51203	252.19	44645.9	3.522
AZ960	RS4-11	0.05318	0.59033	1.05462	1.80458	71.11	1010.06	1.711
AZ960	SW1088	1.36524	1.4785	3.91668	4.38634	11.99	8.3	1.12
AZ960	SW48	0.287184	1.01368	1.33267	2.75572	106.78	252.97	2.068
AZ960	T84	1.2239	1.84407	3.40043	6.32219	85.92	50.67	1.859
AZ960	TGBC11TKB	1.67623	1.22012	5.34538	3.38759	36.63	27.21	0.634
AZ960	THP-1	1.50858	0.805574	4.52029	2.23798	50.49	46.6	0.495
AZ960	U-2-OS	1.85745	1.66517	6.40736	5.28658	17.49	10.35	0.825
AZ960	YH-13	0.470517	1.5368	1.60082	4.64969	190.46	226.62	2.905
AZ960	KM-H2	0.145973	0.633857	1.15716	1.88487	62.89	334.23	1.629
AZ960	CHP-126	0.10544	0.977432	1.1112	2.65762	139.17	827	2.392
AZ960	BFTC-909	1.25322	1.97506	3.50161	7.20708	105.82	57.6	2.058
AZ960	CA46	1.40239	0.96944	4.06492	2.63647	35.14	30.87	0.649
AZ960	RL	-0.335804	0.54209	0.714763	1.7196	140.58	261.43	2.406
AZ960	RPMI-7951	1.10512	1.87485	3.01958	6.51983	115.92	69.65	2.159
AZ960	ST486	-0.385766	0.836593	0.67993	2.30849	239.52	316.87	3.395
AZ960	23132-87	1.50674	1.01022	4.51199	2.74621	39.14	32.95	0.609
AZ960	BFTC-905	1.28551	0.94839	3.61651	2.58155	28.62	26.22	0.714
AZ960	A3-KAW	-0.592042	0.950477	0.553197	2.58694	367.64	260.54	4.676
AZ960	HDLM-2	0.479338	1.29193	1.615	3.63981	125.37	169.52	2.254
AZ960	TE-9	1.67807	1.84024	5.35522	6.29807	17.61	9.66	1.176
AZ960	TE-11	-0.0772	0.982724	0.925705	2.67172	188.62	1372.96	2.886
AZ960	LCLC-97TM1	1.60179	1.75642	4.96189	5.79169	16.72	9.65	1.167
AZ960	KYM-1	1.48771	1.44731	4.42695	4.25165	3.96	2.72	0.96
AZ960	SNU-398	0.179742	1.11297	1.19691	3.04338	154.27	519.2	2.543
AZ960	SUP-B15	2.21024	0.45977	9.11787	1.58371	82.63	79.2	0.174
AZ960	AMO-1	-1.28351	0.812972	0.277063	2.2546	713.75	163.34	8.138
AZ960	EJM	0.775611	1.06861	2.17192	2.91133	34.04	37.78	1.34
AZ960	huH-1	1.0236	1.42316	2.78321	4.15022	49.12	39.03	1.491
AZ960	WM793B	2.26569	0.907444	9.6378	2.47798	74.29	59.95	0.257
AZ960	OCI-AML5	1.02634	0.888252	2.79083	2.43088	12.9	13.45	0.871
AZ960	SNU-C5	2.18629	1.15778	8.90212	3.18287	64.25	47.04	0.358
AZD1332	IGROV-1	1.30139	1.57844	3.67439	4.84737	31.92	21.29	1.319
AZD1332	D-283MED	1.04338	1.35627	2.8388	3.88168	36.74	29.99	1.367
AZD1332	HuH-7	1.31099	1.55874	3.70984	4.75284	28.11	18.9	1.281
AZD1332	KG-1	2.03796	1.2601	7.67492	3.52577	54.06	38.17	0.459
AZD1332	NCI-H716	-1.70363	1.64819	0.182021	5.19756	2755.48	196.75	28.555
AZD1332	OPM-2	0.953965	1.30548	2.59598	3.68947	42.12	36.85	1.421
AZD1332	SW48	2.23545	1.44219	9.3507	4.22996	54.76	35.49	0.452
AZD1332	YH-13	2.17654	1.09751	8.81571	2.99671	66.01	49.58	0.34
AZD1332	23132-87	1.93437	1.51386	6.91966	4.54423	34.33	21.74	0.657
AZD1332	huH-1	2.1515	1.37488	8.59779	3.95461	54	36.1	0.46
AZD2014	SK-N-DZ	1.15836	1.25763	3.18471	3.51707	10.44	8.57	1.104
AZD2014	SBC-5	0.700118	1.29005	2.01399	3.63296	80.39	84.26	1.804
AZD2014	HPAF-II	1.49902	1.79191	4.47732	6.00092	34.03	19.54	1.34
AZD2014	HCC1143	2.22781	1.18688	9.27952	3.27684	64.69	46.72	0.353
AZD2014	EC-GI-10	1.0431	1.5585	2.838	4.75171	67.43	49.41	1.674
AZD2014	HCT-116	1.87299	1.15116	6.50771	3.16186	51.41	38.54	0.486
AZD2014	A498	1.82033	1.50785	6.1739	4.51702	26.84	17.17	0.732
AZD2014	SK-MEL-5	1.18748	1.39521	3.27881	4.03583	23.09	17.49	1.231
AZD2014	IGROV-1	0.420717	1.25206	1.52305	3.49754	129.64	197.6	2.296
AZD2014	OVCAR-8	1.7528	1.67424	5.77076	5.33474	7.56	4.48	0.924
AZD2014	647-V	2.26259	1.70265	9.60799	5.48849	42.88	24.75	0.571
AZD2014	COR-L105	0.637897	1.54347	1.8925	4.6808	147.33	141.96	2.473
AZD2014	Daoy	2.17638	1.00162	8.81434	2.72268	69.11	53.98	0.309
AZD2014	D-283MED	-0.929187	0.728438	0.394875	2.07184	424.68	178.4	5.247
AZD2014	Detroit562	0.771956	1.27484	2.16399	3.57814	65.35	65.14	1.653
AZD2014	HGC-27	-0.264416	1.72104	0.767654	5.59035	628.24	750.88	7.282
AZD2014	HSC-3	1.65869	1.01873	5.2524	2.76967	47.27	38.58	0.527
AZD2014	HuCCT1	1.87478	1.31476	6.51937	3.72387	42.88	29.87	0.571
AZD2014	KYSE-180	1.68739	1.76656	5.40537	5.85072	8.24	4.69	1.082
AZD2014	L-428	2.21227	0.739962	9.13641	2.09586	77.06	66.55	0.229
AZD2014	MDA-MB-468	0.860404	1.09035	2.36412	2.97532	25.85	26.73	1.259
AZD2014	MKN1	1.26141	1.53286	3.5304	4.63142	31.19	21.52	1.312
AZD2014	NCI-H716	2.21468	1.40917	9.15851	4.09256	55.31	36.37	0.447
AZD2014	NCI-N87	-0.015062	0.312056	0.985051	1.36623	38.7	2171.81	1.387
AZD2014	OPM-2	-0.372368	0.947981	0.689101	2.58049	274.47	354.58	3.745
AZD2014	Raji	-0.210787	1.28112	0.809947	3.60068	344.56	707.78	4.446
AZD2014	RS4-11	2.11199	1.04226	8.2647	2.83563	65.69	50.65	0.343
AZD2014	SW1088	1.87205	1.5906	6.5016	4.9067	24.53	15.03	0.755
AZD2014	YH-13	0.574015	1.36685	1.77538	3.92297	120.96	138.12	2.21
AZD2014	KM-H2	2.09985	1.15025	8.16496	3.15899	61.31	45.22	0.387
AZD2014	BFTC-909	0.645205	1.78133	1.90638	5.93775	211.47	176.09	3.115
AZD2014	CA46	1.28712	0.751399	3.62232	2.11996	41.48	41.62	0.585
AZD2014	CAL-85-1	0.770728	1.06032	2.16134	2.88729	33.59	37.57	1.336
AZD2014	RPMI-7951	1.15692	1.38623	3.18013	3.99976	25.77	19.82	1.258
AZD2014	ST486	1.70398	1.0276	5.49577	2.79436	49.15	39.69	0.508
AZD2014	23132-87	-0.379516	1.18909	0.684192	3.28408	379.99	413.32	4.8
AZD2014	A3-KAW	-0.114194	1.31495	0.892085	3.72458	317.51	1251.51	4.175
AZD2014	MKN45	0.92686	1.35777	2.52656	3.88751	53.87	46.49	1.539
AZD2014	TE-9	1.87845	1.59753	6.54333	4.94082	24.49	14.95	0.755
AZD2014	KYM-1	0.58609	1.58086	1.79695	4.85911	170.41	169.73	2.704
AZD2014	PA-TU-8988T	2.15919	1.51099	8.66411	4.53122	47.7	30.02	0.523
AZD2014	SNU-398	1.89444	1.57295	6.6488	4.82083	27.49	16.97	0.725
AZD2014	SUP-B15	1.40323	1.18914	4.06832	3.28426	19.27	15.26	0.807
AZD2014	AMO-1	0.472183	1.11076	1.60349	3.03666	89.38	135.24	1.894
AZD2014	EJM	1.702	1.48454	5.48493	4.41295	19.54	12.78	0.805
AZD2014	huH-1	0.63039	1.07221	1.87834	2.92183	55.55	70.09	1.556
AZD2014	OCUM-1	1.74523	1.6405	5.72723	5.15776	9.94	6	0.901
AZD2014	WM793B	1.71196	1.29804	5.53981	3.66213	33.89	24.18	0.661
AZD3759	EC-GI-10	-0.191034	1.46794	0.826105	4.3403	425.39	868.42	5.254
AZD3759	COR-L105	-0.310398	1.77412	0.733155	5.89507	704.07	671.56	8.041
AZD3759	SW48	-1.05394	1.268	0.348562	3.55375	919.54	220.31	10.195
AZD3759	CCK-81	-0.349642	1.33148	0.70494	3.78664	437.16	480.81	5.372
AZD4547	NCI-H2052	1.66479	1.3979	5.28458	4.04669	23.42	16.03	0.766
AZD4547	SK-N-DZ	1.28721	1.10706	3.62265	3.02544	16.49	14	0.835
AZD4547	SBC-5	2.04744	1.27207	7.748	3.56824	53.95	37.87	0.461
AZD4547	EC-GI-10	2.09064	1.25352	8.09005	3.50266	56.7	40.04	0.433
AZD4547	J82	1.09987	0.606133	3.00377	1.83333	38.97	44.89	0.61
AZD4547	A498	1.84936	1.29591	6.35578	3.65432	42.5	29.93	0.575
AZD4547	OVCAR-8	1.51741	1.28895	4.56042	3.62898	20.42	15.06	0.796
AZD4547	Daoy	1.78869	1.18025	5.98162	3.25519	45.58	34.02	0.544
AZD4547	D-283MED	0.908516	1.05858	2.48064	2.88226	16.19	16.52	1.162
AZD4547	Detroit562	2.20779	1.12091	9.09557	3.06765	66.27	49.23	0.337
AZD4547	G-361	2.18129	1.10752	8.85769	3.02683	65.83	49.23	0.342
AZD4547	HGC-27	2.16076	1.50369	8.67775	4.49824	48.16	30.41	0.518
AZD4547	HSC-3	2.21364	0.785964	9.14898	2.19452	76.01	64.49	0.24
AZD4547	HuH-7	0.055422	1.08507	1.05699	2.95964	180.01	1857.83	2.8
AZD4547	KG-1	-1.23905	0.983609	0.28966	2.67409	823.18	179.38	9.232
AZD4547	KYSE-180	2.28954	1.2855	9.8704	3.61647	63.36	43.85	0.366
AZD4547	L-428	0.954904	1.20396	2.59842	3.3333	28.28	26.08	1.283
AZD4547	MFE-296	1.82843	1.07722	6.22413	2.9365	52.82	41.09	0.472
AZD4547	NCI-H716	-5.24727	1.45161	0.00526185	4.26997	81049.6	127.66	811.495
AZD4547	OPM-2	-1.25179	1.06563	0.285992	2.90267	914.95	185.13	10.149
AZD4547	P31-FUJ	1.65175	0.82049	5.2161	2.27161	56.45	50.33	0.436
AZD4547	Raji	2.01292	1.09958	7.48516	3.0029	59.88	45.37	0.401
AZD4547	RPMI-8402	1.50649	1.03679	4.51089	2.82016	37.48	31.18	0.625
AZD4547	RS4-11	0.277593	1.03805	1.31995	2.8237	113.92	273.95	2.139
AZD4547	SW1088	2.25158	1.29724	9.50275	3.6592	61.49	42.39	0.385
AZD4547	U-2-OS	1.50622	1.58046	4.50963	4.85717	7.71	4.93	1.077
AZD4547	KM-H2	1.67377	1.04683	5.33224	2.84861	46.58	37.46	0.534
AZD4547	BFTC-909	0.390993	1.29795	1.47845	3.66179	147.68	231.96	2.477
AZD4547	CA46	1.53685	0.983026	4.64994	2.67253	42.53	36.04	0.575
AZD4547	A204	0.339746	1.10828	1.40459	3.02913	115.66	226.21	2.157
AZD4547	RPMI-7951	2.12062	1.20546	8.33634	3.33829	59.95	43.16	0.4
AZD4547	ST486	1.93624	1.01094	6.93261	2.74819	60.36	47.79	0.396
AZD4547	23132-87	1.2738	1.12895	3.5744	3.09241	13.48	11.37	0.865
AZD4547	A3-KAW	1.39458	1.31677	4.0333	3.73136	7.49	5.58	0.925
AZD4547	HDLM-2	0.454489	1.24023	1.57537	3.45642	119.4	172.89	2.194
AZD4547	SNU-398	2.19193	1.23169	8.95249	3.42702	61.72	43.81	0.383
AZD4547	SUP-B15	0.32214	1.05206	1.38008	2.86354	107.49	226.58	2.075
AZD4547	AMO-1	1.47591	1.32087	4.37502	3.74669	14.36	10.5	0.856
AZD5153	SK-N-DZ	1.90513	-0.969884	6.72028	0.379127	94.36	150.91	0.056
AZD5153	SBC-5	1.37868	1.75662	3.96964	5.79284	45.93	27.41	1.459
AZD5153	NCI-H1792	0.733146	1.8301	2.08162	6.23451	199.5	149.62	2.995
AZD5153	SHP-77	1.80938	0.221612	6.10667	1.24809	79.56	87.75	0.204
AZD5153	SK-MM-2	1.93986	1.07818	6.95776	2.93933	57.75	44.42	0.422
AZD5153	HCT-116	0.088442	0.229139	1.09247	1.25752	15.11	159.08	1.151
AZD5153	HL-60	-0.760805	1.71329	0.46729	5.54718	1087.09	325.19	11.871
AZD5153	K-562	1.03903	-1.3627	2.82648	0.255969	90.94	231.15	0.091
AZD5153	A498	1.63006	1.48507	5.10419	4.41529	13.5	8.89	0.865
AZD5153	SK-MEL-5	1.66879	1.09781	5.30572	2.99761	43.5	34.21	0.565
AZD5153	SW620	2.19644	1.51546	8.99292	4.55153	49.39	31	0.506
AZD5153	IGROV-1	1.32478	0.884113	3.76134	2.42084	35.64	33.26	0.644
AZD5153	OVCAR-8	1.49212	1.0824	4.44651	2.95175	33.62	27.46	0.664
AZD5153	COR-L105	0.274062	0.301876	1.3153	1.35239	2.82	10.15	1.028
AZD5153	Daoy	1.55326	1.79036	4.72687	5.99159	26.76	15.26	1.268
AZD5153	D-283MED	-1.27566	-1.11184	0.279246	0.328952	17.8	12.84	1.178
AZD5153	Detroit562	-0.141011	0.963242	0.86848	2.62018	201.7	783.1	3.017
AZD5153	G-361	-0.361399	0.925778	0.696701	2.52383	262.25	356.17	3.623
AZD5153	GCT	2.19534	1.56693	8.98307	4.79191	46.66	28.62	0.533
AZD5153	HGC-27	2.24984	1.0432	9.48622	2.83829	70.08	53.63	0.299
AZD5153	HSC-3	1.49047	0.890238	4.43916	2.43571	45.13	40.27	0.549
AZD5153	KG-1	1.30083	-0.567566	3.67236	0.566904	84.56	143.63	0.154
AZD5153	L-428	1.76802	-1.62048	5.85922	0.197804	96.62	191.66	0.034
AZD5153	MDA-MB-468	0.995794	-0.603818	2.70687	0.54672	79.8	160.64	0.202
AZD5153	MKN1	-0.0401788	1.4235	0.960618	4.15164	332.18	3642.92	4.322
AZD5153	NCI-H716	1.51859	1.45489	4.56577	4.28403	6.17	4.19	0.938
AZD5153	NCI-N87	0.386506	-1.63937	1.47183	0.194102	86.81	524.15	0.132
AZD5153	NCI-H28	1.30973	1.52914	3.70519	4.61423	24.53	16.75	1.245
AZD5153	OPM-2	-3.17004	0.331608	0.0420021	1.39321	3216.99	110.46	33.17
AZD5153	Raji	-2.38924	-0.561822	0.0916991	0.570169	521.78	76.49	6.218
AZD5153	RS4-11	0.494711	-1.0291	1.64002	0.357329	78.21	308.02	0.218
AZD5153	SW48	1.22932	0.488669	3.41889	1.63014	52.32	60.25	0.477
AZD5153	TGBC11TKB	-0.602976	0.556958	0.547181	1.74536	218.97	192.37	3.19
AZD5153	U-2-OS	2.00822	0.579344	7.45004	1.78487	76.04	71.15	0.24
AZD5153	YH-13	0.0950194	0.445206	1.09968	1.56081	41.93	368.54	1.419
AZD5153	KM-H2	1.79295	-0.0684386	6.00717	0.933851	84.45	103.82	0.155
AZD5153	CA46	-1.01581	0.403356	0.36211	1.49684	313.37	139.71	4.134
AZD5153	CAL-85-1	0.934096	0.200063	2.54491	1.22148	52	78.58	0.48
AZD5153	RPMI-7951	1.09202	0.476786	2.9803	1.61089	45.95	56.34	0.541
AZD5153	ST486	-2.93563	-0.920657	0.0530971	0.398257	650.05	68.64	7.501
AZD5153	23132-87	0.629696	-0.000186	1.87704	0.999814	46.73	100.03	0.533
AZD5153	BFTC-905	0.615816	0.060722	1.85117	1.0626	42.6	90.14	0.574
AZD5153	A3-KAW	-3.54491	0.12209	0.0288713	1.12986	3813.42	103.44	39.134
AZD5153	MKN45	0.473305	1.35002	1.60529	3.85749	140.3	185.23	2.403
AZD5153	NCI-H810	0.10539	0.369662	1.11114	1.44725	30.25	250.76	1.302
AZD5153	PANC-10-05	1.5584	1.68835	4.75123	5.41056	13.88	8.34	1.139
AZD5153	LCLC-97TM1	0.57133	1.81246	1.77062	6.12549	245.95	217.24	3.46
AZD5153	CCK-81	-0.468329	0.298212	0.626047	1.34745	115.23	163.68	2.152
AZD5153	KYM-1	-1.42021	1.29192	0.241663	3.63977	1406.14	190.97	15.061
AZD5153	PA-TU-8988T	0.095828	1.20135	1.10057	3.32461	202.08	1153.66	3.021
AZD5153	SNU-398	1.39165	1.25703	4.02149	3.51495	12.6	9.67	0.874
AZD5153	SUP-B15	-1.10088	-0.937037	0.332577	0.391787	17.8	14.88	1.178
AZD5153	AMO-1	-2.7971	0.311185	0.0609869	1.36504	2138.26	111.13	22.383
AZD5153	EJM	1.31025	0.8263	3.70709	2.28485	38.37	36.94	0.616
AZD5153	huH-1	1.79829	-0.162596	6.03934	0.849934	85.93	109.04	0.141
AZD5153	NUGC-4	1.38019	1.46678	3.97566	4.33525	9.04	6.27	1.09
AZD5153	OCUM-1	1.39907	1.96253	4.05144	7.11733	75.67	40.27	1.757
AZD5153	WM793B	1.61444	0.669141	5.02509	1.95256	61.14	58.55	0.389
AZD5153	OCI-AML5	1.3763	0.686708	3.96024	1.98716	49.82	50.1	0.502
AZD5153	SNU-C5	2.12841	0.658277	8.40153	1.93146	77.01	69.07	0.23
AZD5363	HCC1954	1.53803	1.37	4.6554	3.93533	15.47	10.93	0.845
AZD5363	EC-GI-10	2.11613	1.65881	8.29898	5.25304	36.7	21.61	0.633
AZD5363	HL-60	1.93337	1.72709	6.91279	5.62424	18.64	10.67	0.814
AZD5363	A498	1.20068	1.51872	3.32237	4.56639	37.44	26.49	1.374
AZD5363	IGROV-1	-0.55622	1.75259	0.573372	5.7695	906.24	415.09	10.062
AZD5363	SF295	1.56524	1.78885	4.78383	5.98254	25.06	14.29	1.251
AZD5363	Detroit562	1.06823	1.70902	2.91021	5.52357	89.8	59.99	1.898
AZD5363	HGC-27	-0.649785	1.3434	0.522158	3.83204	633.89	306.75	7.339
AZD5363	HSC-3	1.66031	1.34783	5.26092	3.84906	26.84	18.82	0.732
AZD5363	MEL-HO	1.78712	1.71392	5.97225	5.55068	7.06	4.1	0.929
AZD5363	NCI-H716	1.985	1.46428	7.27904	4.32444	40.59	26.23	0.594
AZD5363	OPM-2	0.826557	1.85046	2.28544	6.36275	178.4	123.88	2.784
AZD5363	P31-FUJ	1.64298	1.40148	5.17057	4.06119	21.46	14.7	0.785
AZD5363	RPMI-8402	0.608358	1.75744	1.83741	5.79758	215.53	188.88	3.155
AZD5363	SW1088	1.30054	1.57016	3.67129	4.80744	30.95	20.73	1.309
AZD5363	SW48	1.40725	1.50743	4.08472	4.5151	10.54	7.12	1.105
AZD5363	THP-1	1.49328	1.34563	4.45166	3.84062	13.73	9.89	0.863
AZD5363	YH-13	1.98387	1.65246	7.27082	5.2198	28.21	16.71	0.718
AZD5363	BFTC-909	1.10186	1.98833	3.00975	7.30333	142.66	80.45	2.427
AZD5363	RL	1.64998	0.862379	5.20687	2.36879	54.51	47.73	0.455
AZD5363	RPMI-7951	1.75256	1.48551	5.76936	4.41722	23.44	15.24	0.766
AZD5363	23132-87	0.994664	1.56154	2.70382	4.76617	76.28	56.99	1.763
AZD5363	A3-KAW	2.26497	1.38098	9.63087	3.97881	58.69	39.03	0.413
AZD5363	COR-L279	2.25871	1.73699	9.57075	5.68023	40.65	23.1	0.593
AZD5363	MKN45	2.18728	1.59345	8.91094	4.92068	44.78	27.15	0.552
AZD5363	EN	0.839157	1.50243	2.31442	4.49258	94.11	79.04	1.941
AZD5363	OCUM-1	2.2694	1.71507	9.67359	5.55704	42.55	24.43	0.574
AZD5363	SNU-C5	2.06064	1.63047	7.85098	5.10628	34.96	20.88	0.65
AZD5438	SK-N-DZ	1.51979	1.22967	4.57128	3.42009	25.18	19.09	0.748
AZD5438	SBC-5	1.66621	1.67383	5.29208	5.33254	0.76	0.46	1.008
AZD5438	NCI-H1792	1.15704	2.04944	3.1805	7.76354	144.1	77.13	2.441
AZD5438	SHP-77	1.09039	1.55341	2.97545	4.72754	58.89	42.46	1.589
AZD5438	HCC1954	0.9092	1.6323	2.48234	5.11562	106.08	79.53	2.061
AZD5438	EC-GI-10	1.19085	1.38009	3.28989	3.97527	20.83	15.89	1.208
AZD5438	SK-MM-2	0.45965	1.4641	1.58352	4.32367	173.04	218.53	2.73
AZD5438	HCT-116	0.641806	1.23154	1.89991	3.42649	80.35	91.89	1.804
AZD5438	HL-60	1.92956	1.80763	6.88649	6.09595	11.48	6.32	0.885
AZD5438	SW620	1.53694	1.83083	4.65035	6.23906	34.16	19.12	1.342
AZD5438	IGROV-1	1.91389	1.48244	6.77939	4.40368	35.04	22.54	0.65
AZD5438	OVCAR-8	1.93701	1.59938	6.93798	4.94997	28.65	17.43	0.713
AZD5438	Daoy	1.6604	1.69933	5.26141	5.4703	3.97	2.34	1.04
AZD5438	D-283MED	0.399856	1.17921	1.49161	3.25181	118.01	194.91	2.18
AZD5438	Detroit562	0.215945	1.67456	1.24103	5.33644	330	675.46	4.3
AZD5438	G-361	1.84693	1.44546	6.34034	4.24379	33.07	21.74	0.669
AZD5438	HGC-27	0.759862	1.71525	2.13798	5.55804	159.97	125.73	2.6
AZD5438	HSC-3	1.17884	1.35297	3.25059	3.8689	19.02	14.77	1.19
AZD5438	HuCCT1	2.18641	1.20383	8.90316	3.33285	62.57	44.94	0.374
AZD5438	KG-1	1.41242	1.08874	4.10588	2.97053	27.65	22.92	0.723
AZD5438	KYSE-180	0.948518	1.73486	2.58188	5.66813	119.54	82.9	2.195
AZD5438	L-428	2.23222	1.09487	9.32055	2.98879	67.93	50.95	0.321
AZD5438	MDA-MB-468	0.840668	1.21912	2.31791	3.38421	46	45.02	1.46
AZD5438	MFE-296	2.20457	1.09987	9.06633	3.00376	66.87	50.11	0.331
AZD5438	MKN1	2.07205	1.68759	7.94107	5.40644	31.92	18.55	0.681
AZD5438	NCI-H716	2.23249	1.60135	9.32301	4.9597	46.8	28.27	0.532
AZD5438	NCI-H358	2.17841	1.52189	8.83222	4.58087	48.13	30.14	0.519
AZD5438	OPM-2	0.506596	1.33314	1.65963	3.79293	128.54	163.16	2.285
AZD5438	Raji	1.06959	1.45759	2.9142	4.29559	47.4	36.27	1.474
AZD5438	RS4-11	-1.15309	1.01742	0.315661	2.76605	776.27	188.23	8.763
AZD5438	TGBC11TKB	1.18299	1.21235	3.26411	3.36137	2.98	2.48	1.03
AZD5438	YH-13	0.679922	1.27519	1.97372	3.5794	81.35	87.55	1.814
AZD5438	KM-H2	2.17824	1.12428	8.83077	3.07799	65.14	48.39	0.349
AZD5438	PSN1	1.51543	1.67154	4.55136	5.32038	16.9	10.3	1.169
AZD5438	COLO-668	2.06706	1.73532	7.90156	5.67073	28.23	16.05	0.718
AZD5438	BFTC-909	1.97085	1.90551	7.17675	6.72285	6.32	3.31	0.937
AZD5438	CA46	2.27868	1.04246	9.76374	2.8362	70.95	54.25	0.29
AZD5438	CAL-85-1	1.76147	1.5094	5.82101	4.52402	22.28	14.31	0.777
AZD5438	RPMI-7951	0.698341	1.66127	2.01042	5.266	161.94	137.89	2.619
AZD5438	ST486	-0.624594	1.03016	0.535479	2.80151	423.18	264.93	5.232
AZD5438	23132-87	1.44527	1.19295	4.24301	3.29679	22.3	17.46	0.777
AZD5438	BFTC-905	1.42896	1.14118	4.17434	3.13046	25.01	20.14	0.75
AZD5438	A3-KAW	0.044601	1.24316	1.04561	3.46655	231.53	2687.29	3.315
AZD5438	HDLM-2	2.03352	1.38335	7.64097	3.98824	47.8	31.97	0.522
AZD5438	MKN45	2.15018	1.41289	8.58637	4.10779	52.16	34.29	0.478
AZD5438	NCI-H810	1.90465	1.36789	6.71706	3.92707	41.54	28.18	0.585
AZD5438	TE-9	1.83803	1.56324	6.28413	4.77428	24.03	14.95	0.76
AZD5438	LCLC-97TM1	1.66547	1.7429	5.28814	5.71387	8.05	4.65	1.081
AZD5438	CCK-81	1.30041	1.29323	3.67082	3.64453	0.72	0.55	0.993
AZD5438	EN	1.53642	1.13576	4.64793	3.11355	33.01	26.08	0.67
AZD5438	KYM-1	0.895688	1.57198	2.44902	4.81617	96.66	75.51	1.967
AZD5438	PA-TU-8988T	1.63325	1.75927	5.12047	5.80821	13.43	7.72	1.134
AZD5438	SNU-398	-0.0827432	1.44973	0.920588	4.26197	362.96	1852.09	4.63
AZD5438	SUP-B15	1.32987	1.23828	3.78055	3.44967	8.75	6.89	0.912
AZD5438	AMO-1	-0.103809	1.44489	0.901397	4.24139	370.53	1491.87	4.705
AZD5438	EJM	1.78696	1.36631	5.97125	3.92086	34.34	23.54	0.657
AZD5438	OCUM-1	2.09991	1.73365	8.16539	5.66126	30.67	17.44	0.693
AZD5438	WM793B	1.34795	1.19929	3.84953	3.31775	13.81	11.03	0.862
AZD5438	OCI-AML5	1.96886	1.65022	7.16252	5.20813	27.29	16.18	0.727
AZD5438	SNU-C5	1.13251	1.25175	3.10343	3.49645	12.66	10.53	1.127
AZD5991	SHP-77	1.47299	0.498414	4.36225	1.64611	62.26	66.16	0.377
AZD5991	HCC1954	-3.01678	1.33354	0.0489585	3.79444	7650.33	144.2	77.503
AZD5991	SK-MM-2	-1.0791	0.692471	0.339901	1.99865	488.01	164.17	5.88
AZD5991	HL-60	-2.29291	1.66674	0.100973	5.2949	5143.9	172.69	52.439
AZD5991	SK-MEL-2	-0.209671	1.23407	0.810851	3.43518	323.65	688.57	4.237
AZD5991	HGC-27	1.07602	0.939298	2.93299	2.55818	12.78	12.71	0.872
AZD5991	KG-1	0.587431	0.499844	1.79936	1.64846	8.39	14.91	0.916
AZD5991	KYSE-180	1.45273	0.987928	4.27476	2.68566	37.17	31.99	0.628
AZD5991	MDA-MB-468	1.63377	1.33889	5.12316	3.8148	25.54	18.05	0.745
AZD5991	OPM-2	-3.05112	0.387281	0.0473061	1.47297	3013.7	112.69	31.137
AZD5991	Raji	-2.68412	0.237538	0.068281	1.26812	1757.21	108.85	18.572
AZD5991	RS4-11	-1.5982	0.220696	0.20226	1.24694	516.5	113.81	6.165
AZD5991	TGBC11TKB	-0.333853	1.11592	0.716159	3.05238	326.22	434.26	4.262
AZD5991	ST486	-2.10746	0.509876	0.121547	1.66508	1269.91	124.19	13.699
AZD5991	A3-KAW	-3.13945	1.01449	0.0433064	2.75797	6268.5	132.31	63.685
AZD5991	HDLM-2	-0.599834	1.31186	0.548903	3.71307	576.45	318.7	6.765
AZD5991	CCK-81	0.315246	1.50811	1.3706	4.5182	229.65	378.39	3.297
AZD5991	EN	1.64005	0.903293	5.15545	2.46772	52.13	44.92	0.479
AZD5991	SNU-398	-1.7563	1.22625	0.172682	3.40843	1873.82	169.82	19.738
AZD5991	SUP-B15	-0.244464	-1.29094	0.783124	0.275013	64.88	428.07	0.351
AZD5991	AMO-1	-3.04321	1.06006	0.0476814	2.88654	5953.81	134.83	60.538
AZD6482	MDA-MB-468	2.11028	0.960196	8.25058	2.61221	68.34	54.5	0.317
AZD6482	THP-1	1.57149	0.969764	4.8138	2.63732	45.21	38.29	0.548
AZD6738	SK-N-DZ	0.539968	0.719424	1.71595	2.05325	19.66	33.23	1.197
AZD6738	SBC-5	1.1083	1.54032	3.02921	4.66606	54.04	38.98	1.54
AZD6738	Calu-6	1.79946	1.24976	6.04641	3.4895	42.29	30.55	0.577
AZD6738	NCI-H1792	1.73813	1.74036	5.68669	5.69942	0.22	0.13	1.002
AZD6738	HCC1143	0.802568	1.16508	2.23126	3.20617	43.69	45.17	1.437
AZD6738	HCC1599	0.678425	1.02839	1.97077	2.79655	41.9	51.58	1.419
AZD6738	EC-GI-10	1.71056	1.11783	5.53204	3.0582	44.72	34.65	0.553
AZD6738	TE-1	1.5876	1.33261	4.89199	3.79091	22.51	16.06	0.775
AZD6738	HL-60	2.04279	1.35774	7.71212	3.88742	49.59	33.53	0.504
AZD6738	K-562	1.06369	0.928419	2.89705	2.5305	12.65	12.72	0.873
AZD6738	A498	2.09035	1.39105	8.08771	4.01908	50.31	33.45	0.497
AZD6738	SK-MEL-2	1.03891	1.10417	2.82614	3.01673	6.74	6.28	1.067
AZD6738	IGROV-1	0.944873	0.746083	2.57249	2.10872	18.03	21.04	0.82
AZD6738	SF295	1.56333	1.49845	4.77468	4.47476	6.28	4.15	0.937
AZD6738	OVCAR-8	1.97244	0.663318	7.18819	1.94122	72.99	66.37	0.27
AZD6738	647-V	2.08351	1.97391	8.03265	7.19875	10.38	5.26	0.896
AZD6738	Daoy	1.41352	1.14593	4.11041	3.14538	23.48	18.93	0.765
AZD6738	D-283MED	-1.02554	0.902375	0.358603	2.46545	587.51	187.99	6.875
AZD6738	Detroit562	1.0692	1.17468	2.91305	3.23711	11.12	9.87	1.111
AZD6738	G-361	2.29076	1.21993	9.88247	3.38695	65.73	46.75	0.343
AZD6738	HGC-27	0.694116	1.02971	2.00194	2.80026	39.88	48.35	1.399
AZD6738	HSC-3	2.27825	1.10536	9.75958	3.02032	69.05	51.48	0.309
AZD6738	HuCCT1	1.45687	0.876205	4.29249	2.40177	44.05	39.86	0.56
AZD6738	IPC-298	1.44853	0.719312	4.25685	2.05302	51.77	50.34	0.482
AZD6738	KG-1	1.53199	0.529332	4.62737	1.6978	63.31	65.45	0.367
AZD6738	KYSE-180	1.06526	1.56367	2.9016	4.77633	64.61	46.79	1.646
AZD6738	KYSE-510	2.08794	1.05176	8.06831	2.86269	64.52	49.63	0.355
AZD6738	L-428	1.53827	0.893872	4.65653	2.44458	47.5	41.89	0.525
AZD6738	MDA-MB-468	1.66602	0.950345	5.29107	2.5866	51.11	42.96	0.489
AZD6738	MKN1	1.61412	1.06923	5.02345	2.91312	42.01	33.76	0.58
AZD6738	NCI-H716	2.1911	1.13746	8.94507	3.11883	65.13	48.09	0.349
AZD6738	OPM-2	1.13484	1.08009	3.11068	2.94495	5.33	4.82	0.947
AZD6738	P31-FUJ	0.838047	0.678079	2.31185	1.97009	14.78	19.09	0.852
AZD6738	Raji	0.587201	0.694716	1.79895	2.00314	11.35	18.31	1.114
AZD6738	RPMI-8402	-0.323378	0.659281	0.7237	1.9334	167.16	303.87	2.672
AZD6738	RS4-11	0.870447	0.757212	2.38798	2.13232	10.71	13.01	0.893
AZD6738	SJSA-1	2.14428	0.851748	8.53586	2.34374	72.54	60.28	0.275
AZD6738	SW1088	2.05598	1.15453	7.8145	3.17253	59.4	43.85	0.406
AZD6738	SW48	1.43369	0.856271	4.19413	2.35436	43.87	40.27	0.561
AZD6738	T84	0.519242	1.26089	1.68075	3.52857	109.94	142.83	2.099
AZD6738	TGBC11TKB	0.306289	0.865826	1.35838	2.37697	74.99	182.68	1.75
AZD6738	THP-1	0.943711	0.470287	2.5695	1.60045	37.71	50.17	0.623
AZD6738	YH-13	1.95713	1.30817	7.07898	3.69938	47.74	33.16	0.523
AZD6738	KM-H2	1.61499	0.805648	5.02785	2.23815	55.49	50.11	0.445
AZD6738	CHP-126	0.885472	0.612899	2.42413	1.84577	23.86	30.78	0.761
AZD6738	BFTC-909	0.20818	1.66118	1.23143	5.2655	327.59	697.95	4.276
AZD6738	CA46	1.84449	0.800212	6.32486	2.22601	64.81	56.62	0.352
AZD6738	CAL-85-1	2.02522	0.840049	7.57778	2.31648	69.43	58.52	0.306
AZD6738	RL	1.48805	0.875683	4.42843	2.40051	45.79	41.15	0.542
AZD6738	RPMI-7951	0.728272	1.19796	2.0715	3.31336	59.95	64.49	1.599
AZD6738	ST486	0.947382	0.621576	2.57895	1.86186	27.81	34.39	0.722
AZD6738	23132-87	1.48356	0.788813	4.4086	2.20078	50.08	46.83	0.499
AZD6738	BFTC-905	0.789004	0.710859	2.2012	2.03574	7.52	9.9	0.925
AZD6738	A3-KAW	-0.803435	0.793008	0.447788	2.21003	393.54	198.7	4.935
AZD6738	COR-L279	2.23803	1.27198	9.37481	3.56791	61.94	43.17	0.381
AZD6738	MKN45	1.31134	0.781536	3.71113	2.18483	41.13	40.4	0.589
AZD6738	NCI-H810	1.92309	0.724307	6.84208	2.0633	69.84	62.34	0.302
AZD6738	TE-9	1.87731	1.14903	6.53589	3.15513	51.73	38.79	0.483
AZD6738	TE-11	0.393558	0.768822	1.48225	2.15722	45.54	95.35	1.455
AZD6738	LCLC-97TM1	1.39906	1.59279	4.05139	4.91744	21.38	13.85	1.214
AZD6738	CCK-81	0.595611	0.839813	1.81414	2.31593	27.66	41	1.277
AZD6738	KYM-1	-0.804323	0.9564	0.447391	2.60231	481.66	218.91	5.817
AZD6738	SNU-398	1.06311	0.973667	2.89537	2.64764	8.56	8.41	0.914
AZD6738	SUP-B15	0.749023	0.626105	2.11493	1.87031	11.57	16.41	0.884
AZD6738	AMO-1	1.71867	0.859603	5.57712	2.36222	57.64	49.98	0.424
AZD6738	EJM	1.72085	1.03491	5.58927	2.81485	49.64	39.86	0.504
AZD6738	NCI-H1568	2.28892	1.21874	9.86432	3.38293	65.71	46.75	0.343
AZD6738	OCUM-1	1.49534	1.54354	4.46084	4.68111	4.94	3.22	1.049
AZD6738	WM793B	1.08354	0.862024	2.95512	2.36795	19.87	20.44	0.801
AZD6738	SNU-C5	0.947036	0.668714	2.57806	1.95173	24.29	29.39	0.757
AZD7762	ChaGo-K-1	0.727099	-0.18119	2.06907	0.834276	59.68	124.92	0.403
AZD7762	NCI-H1650	-0.175007	0.389837	0.839451	1.47674	75.92	322.76	1.759
AZD7762	NCI-H2052	1.38076	0.046076	3.97791	1.04715	73.68	96.66	0.263
AZD7762	SK-N-DZ	-0.905567	-1.86469	0.404313	0.154944	61.68	105.91	0.383
AZD7762	SBC-5	0.02825	0.567439	1.02865	1.76374	71.46	1908.63	1.715
AZD7762	Calu-6	-0.394644	0.475066	0.67392	1.60812	138.62	220.38	2.386
AZD7762	NCI-H1792	-0.416949	0.948516	0.659055	2.58188	291.75	327.49	3.918
AZD7762	HPAF-II	0.72591	0.840552	2.06661	2.31765	12.15	15.79	1.121
AZD7762	SHP-77	-0.296959	0.599073	0.743074	1.82043	144.99	301.74	2.45
AZD7762	HCC1954	-0.406538	0.598981	0.665952	1.82026	173.33	247.34	2.733
AZD7762	HCC1143	-1.58775	0.501258	0.204385	1.6508	707.69	131.57	8.077
AZD7762	HCC1599	-1.24806	0.452489	0.287061	1.57222	447.7	136.26	5.477
AZD7762	EC-GI-10	0.5657	-0.518758	1.76068	0.59526	66.19	191.7	0.338
AZD7762	J82	1.66462	-1.07578	5.28364	0.341032	93.55	164.63	0.065
AZD7762	SK-MM-2	2.09229	0.278909	8.10346	1.32169	83.69	86.67	0.163
AZD7762	TE-1	-0.411744	0.495763	0.662494	1.64175	147.81	220.41	2.478
AZD7762	HCT-116	0.780345	-0.875601	2.18223	0.416611	80.91	212.21	0.191
AZD7762	HL-60	0.296543	0.428294	1.3452	1.53464	14.08	44.43	1.141
AZD7762	K-562	-0.682076	-0.424132	0.505566	0.654337	29.43	37.82	1.294
AZD7762	A498	0.68741	0.112479	1.98856	1.11905	43.73	83.64	0.563
AZD7762	SK-MEL-2	-0.037465	0.009352	0.963228	1.0094	4.79	124.96	1.048
AZD7762	SK-MEL-5	2.13957	0.122379	8.49578	1.13018	86.7	94.28	0.133
AZD7762	SW620	0.975337	0.452594	2.65206	1.57239	40.71	53.6	0.593
AZD7762	IGROV-1	-1.12063	-1.00609	0.326075	0.365646	12.14	10.22	1.121
AZD7762	SF295	0.084248	0.42482	1.0879	1.52932	40.58	404.25	1.406
AZD7762	OVCAR-4	0.107293	0.237423	1.11326	1.26798	13.9	121.28	1.139
AZD7762	OVCAR-8	-1.10159	-0.767791	0.332342	0.464037	39.63	30.3	1.396
AZD7762	647-V	-0.100066	1.54634	0.904778	4.69427	418.83	1645.32	5.188
AZD7762	COR-L105	0.45221	0.0035452	1.57178	1.00355	36.15	99.22	0.638
AZD7762	Daoy	-0.357674	-0.318415	0.699301	0.727301	4	10.98	1.04
AZD7762	D-283MED	-2.37124	-1.50642	0.0933648	0.221702	137.46	36.47	2.375
AZD7762	Detroit562	-0.286448	0.157926	0.750926	1.17108	55.95	155.13	1.56
AZD7762	G-361	1.67411	-0.045934	5.33403	0.955105	82.09	102.74	0.179
AZD7762	GCT	0.641717	0.671954	1.89974	1.95806	3.07	4.71	1.031
AZD7762	HGC-27	-0.439969	0.681149	0.644057	1.97615	206.83	254.82	3.068
AZD7762	HSC-3	-0.374189	0.713303	0.687847	2.04072	196.68	290.63	2.967
AZD7762	HuCCT1	-0.790038	-0.535358	0.453828	0.58546	29	32.24	1.29
AZD7762	IPC-298	-0.771797	-1.36888	0.462182	0.254391	44.96	77.36	0.55
AZD7762	KG-1	-0.034951	-0.489834	0.965653	0.612728	36.55	1301.49	0.635
AZD7762	KYSE-180	-1.01408	-0.075419	0.362735	0.927355	155.66	92.56	2.557
AZD7762	KYSE-510	0.710562	-1.15871	2.03513	0.31389	84.58	263.07	0.154
AZD7762	L-428	-0.621076	-0.580329	0.537366	0.559714	4.16	6.56	1.042
AZD7762	MDA-MB-468	0.332571	-0.177647	1.39455	0.837238	39.96	153.42	0.6
AZD7762	MEL-HO	1.65889	-1.34312	5.25346	0.261031	95.03	180.96	0.05
AZD7762	MFE-296	1.17706	-1.34889	3.24481	0.259528	92	214.6	0.08
AZD7762	MKN1	-0.992558	-0.304914	0.370627	0.737187	98.9	69.28	1.989
AZD7762	NCI-H716	-0.835532	-0.861631	0.433644	0.422472	2.58	3.12	0.974
AZD7762	NCI-N87	0.838888	-1.73316	2.31379	0.176725	92.36	306.6	0.076
AZD7762	NCI-H358	-0.20651	-0.0116068	0.813418	0.98846	21.52	94.38	1.215
AZD7762	NCI-H28	0.978092	1.0155	2.65938	2.76075	3.81	3.82	1.038
AZD7762	OPM-2	-1.23078	0.111188	0.292066	1.1176	282.65	109.03	3.827
AZD7762	P31-FUJ	-2.21064	-1.68797	0.10963	0.184895	68.65	23.64	1.687
AZD7762	Raji	-1.51541	0.21725	0.219717	1.24265	465.57	114.34	5.656
AZD7762	RPMI-8402	-1.98704	-0.984375	0.1371	0.373673	172.55	50.46	2.726
AZD7762	RS4-11	-0.981519	-1.03629	0.374741	0.354769	5.33	5.58	0.947
AZD7762	SJSA-1	-0.231383	-1.22843	0.793436	0.292753	63.1	430.91	0.369
AZD7762	SW1088	-0.69166	0.072774	0.500744	1.07549	114.78	110.52	2.148
AZD7762	SW48	-0.547165	-0.944884	0.578588	0.388725	32.81	72.69	0.672
AZD7762	T84	-0.575215	0.67846	0.562584	1.97084	250.32	217.95	3.503
AZD7762	TGBC11TKB	-1.80381	-0.888634	0.164671	0.411217	149.72	50.74	2.497
AZD7762	THP-1	-1.23706	-1.59271	0.290236	0.203374	29.93	28.75	0.701
AZD7762	U-2-OS	-0.842334	-0.481958	0.430704	0.617573	43.39	42.78	1.434
AZD7762	YH-13	0.0887108	0.348561	1.09276	1.41703	29.67	292.92	1.297
AZD7762	KM-H2	0.160874	-2.04584	1.17454	0.129272	88.99	1371.7	0.11
AZD7762	PSN1	1.15084	-0.846191	3.16084	0.429046	86.43	173.53	0.136
AZD7762	CHP-126	-1.46422	0.238711	0.231259	1.26961	449	116.3	5.49
AZD7762	COLO-668	-0.201552	0.108957	0.817461	1.11511	36.41	154.06	1.364
AZD7762	BFTC-909	-0.650625	0.451039	0.521719	1.56994	200.92	169.32	3.009
AZD7762	CA46	0.403096	-0.523698	1.49645	0.592326	60.42	229.92	0.396
AZD7762	A204	-0.260915	-0.058729	0.770346	0.942962	22.41	77.49	1.224
AZD7762	CAL-85-1	0.055398	-0.934843	1.05696	0.392648	62.85	1787.5	0.371
AZD7762	RL	0.240556	-0.54554	1.27196	0.579529	54.44	326.78	0.456
AZD7762	RPMI-7951	-0.900405	0.281863	0.406405	1.3256	226.18	131.3	3.262
AZD7762	ST486	-1.40036	-1.14959	0.246509	0.316766	28.5	17.91	1.285
AZD7762	23132-87	0.289922	-1.20423	1.33632	0.299924	77.56	515.36	0.224
AZD7762	BFTC-905	-0.223763	-0.444054	0.799505	0.641431	19.77	98.45	0.802
AZD7762	A3-KAW	-1.89235	-1.39063	0.150717	0.248919	65.16	26.51	1.652
AZD7762	COR-L279	-0.025736	-0.367584	0.974592	0.692405	28.95	1328.29	0.71
AZD7762	HDLM-2	0.390357	0.338569	1.47751	1.40294	5.05	13.27	0.95
AZD7762	MKN45	-1.16638	-0.16964	0.311492	0.843969	170.94	85.46	2.709
AZD7762	NCI-H810	-0.081299	-0.815052	0.921918	0.442616	51.99	902.54	0.48
AZD7762	TE-9	-0.085696	0.463832	0.917873	1.59016	73.24	641.25	1.732
AZD7762	TE-11	-0.515577	-0.839648	0.597156	0.431863	27.68	62.86	0.723
AZD7762	LCLC-97TM1	0.069964	0.599576	1.07247	1.82135	69.83	756.98	1.698
AZD7762	CCK-81	-1.41804	-1.35546	0.242188	0.257829	6.46	4.41	1.065
AZD7762	EN	0.410941	-1.17404	1.50824	0.309116	79.5	385.7	0.205
AZD7762	KYM-1	-2.68516	-0.437196	0.0682101	0.645845	846.85	83.72	9.468
AZD7762	OV-90	1.58236	1.05	4.86645	2.85765	41.28	33.64	0.587
AZD7762	PA-TU-8988T	1.80006	0.400739	6.05003	1.49293	75.32	77.74	0.247
AZD7762	SNU-398	-0.205016	-0.992823	0.814634	0.370529	54.52	384.27	0.455
AZD7762	SUP-B15	-0.507614	-0.93661	0.60193	0.391954	34.88	84.51	0.651
AZD7762	AMO-1	-1.47988	-0.775064	0.227664	0.460674	102.35	47.63	2.023
AZD7762	EJM	-0.456658	0.51382	0.633397	1.67166	163.92	212.52	2.639
AZD7762	huH-1	1.13998	-0.959334	3.1267	0.383148	87.75	184.15	0.123
AZD7762	NCI-H1568	-0.036992	-0.045226	0.963684	0.955781	0.82	22.26	0.992
AZD7762	OCUM-1	-0.218359	0.173513	0.803837	1.18948	47.97	179.46	1.48
AZD7762	WM793B	-1.2496	-0.934588	0.28662	0.392747	37.03	25.21	1.37
AZD7762	SNU-C5	-1.25663	-1.17388	0.284611	0.309165	8.63	6.59	1.086
AZD8055	NCI-H2052	-0.643801	0.230486	0.525292	1.25921	139.72	135.8	2.397
AZD8055	SK-N-DZ	-0.392609	-0.717394	0.675293	0.488022	27.73	82.72	0.723
AZD8055	SBC-5	-1.10016	-0.569624	0.332818	0.565738	69.98	48.22	1.7
AZD8055	Calu-6	0.06267	-0.670052	1.06468	0.511682	51.94	1169.17	0.481
AZD8055	NCI-H1792	-2.1007	-0.645911	0.122371	0.524185	328.36	69.25	4.284
AZD8055	SHP-77	0.45529	-1.10052	1.57663	0.332699	78.9	341.72	0.211
AZD8055	HCC1954	-0.270258	-1.09421	0.763183	0.334806	56.13	304.87	0.439
AZD8055	HCC1599	0.421742	-0.592797	1.52462	0.552779	63.74	240.56	0.363
AZD8055	EC-GI-10	-0.557255	-0.89535	0.572779	0.408465	28.69	60.67	0.713
AZD8055	J82	-0.008646	-0.898614	0.991391	0.407134	58.93	10293.4	0.411
AZD8055	HCT-116	-0.69747	-0.917016	0.497843	0.39971	19.71	31.48	0.803
AZD8055	K-562	0.041706	-1.14981	1.04259	0.316696	69.62	2856.95	0.304
AZD8055	A498	-1.39639	-0.712861	0.247489	0.49024	98.09	48.95	1.981
AZD8055	SW620	0.658264	-0.582073	1.93144	0.558739	71.07	188.43	0.289
AZD8055	IGROV-1	-1.76507	-0.995029	0.171174	0.369713	115.99	43.63	2.16
AZD8055	OVCAR-4	0.412855	-1.13215	1.51113	0.322339	78.67	374.22	0.213
AZD8055	OVCAR-8	0.226657	-0.751233	1.2544	0.471784	62.39	431.44	0.376
AZD8055	647-V	0.426628	-0.277751	1.53208	0.757485	50.56	165.1	0.494
AZD8055	COR-L105	-0.871702	-0.801225	0.418239	0.448779	7.3	8.08	1.073
AZD8055	Daoy	-0.822945	-1.02108	0.439136	0.360207	17.97	24.08	0.82
AZD8055	D-283MED	-3.15311	-1.50353	0.042719	0.222344	420.48	52.32	5.205
AZD8055	Detroit562	-1.00543	-1.16192	0.365889	0.312884	14.49	15.57	0.855
AZD8055	GCT	0.230394	-0.975476	1.2591	0.377013	70.06	523.39	0.299
AZD8055	HGC-27	-1.92985	-0.445729	0.145169	0.640357	341.11	76.9	4.411
AZD8055	HSC-3	0.074094	-0.585386	1.07691	0.556891	48.29	890.06	0.517
AZD8055	HuCCT1	-1.0389	-0.799963	0.353845	0.449346	26.99	23	1.27
AZD8055	KYSE-180	-0.105144	-0.206656	0.900195	0.813299	9.65	96.55	0.903
AZD8055	L-428	-0.627684	-1.13853	0.533827	0.320291	40	81.39	0.6
AZD8055	MDA-MB-468	-1.23888	-1.11211	0.289709	0.328863	13.52	10.23	1.135
AZD8055	MKN1	-0.749371	-0.744904	0.472664	0.47478	0.45	0.6	1.004
AZD8055	NCI-H716	-0.170133	-1.38443	0.843552	0.250468	70.31	713.73	0.297
AZD8055	NCI-H358	-0.788794	-1.19346	0.454392	0.303171	33.28	51.3	0.667
AZD8055	OPM-2	-2.23354	-0.769973	0.107148	0.463026	332.14	65.53	4.321
AZD8055	P31-FUJ	-0.312621	-1.08978	0.731527	0.33629	54.03	248.59	0.46
AZD8055	Raji	0.013798	-0.691442	1.01389	0.500853	50.6	5111.18	0.494
AZD8055	RPMI-8402	-0.698205	-1.03459	0.497477	0.355373	28.57	48.18	0.714
AZD8055	RS4-11	-0.337069	-0.869889	0.71386	0.418998	41.31	158.07	0.587
AZD8055	SJSA-1	-0.806165	-0.928662	0.446567	0.395082	11.53	15.2	0.885
AZD8055	SW1088	-1.17625	-0.388694	0.308434	0.677941	119.8	66.95	2.198
AZD8055	SW48	-1.22841	-0.917447	0.292757	0.399538	36.47	25.31	1.365
AZD8055	T84	0.623715	-0.373919	1.86585	0.688033	63.12	159.95	0.369
AZD8055	TGBC11TKB	0.445022	-1.02232	1.56052	0.359758	76.95	329.72	0.231
AZD8055	YH-13	-1.54112	-1.04464	0.214141	0.351819	64.29	32.22	1.643
AZD8055	RCC10RGB	0.026616	-0.761572	1.02697	0.466932	54.53	2961.33	0.455
AZD8055	KM-H2	-0.102202	-0.84756	0.902847	0.428459	52.54	729.3	0.475
AZD8055	BFTC-909	-2.2506	-0.68576	0.105336	0.503707	378.19	69.53	4.782
AZD8055	CA46	-0.268996	-1.22645	0.764146	0.293333	61.61	355.93	0.384
AZD8055	A204	-0.61288	-0.754236	0.541788	0.47037	13.18	23.06	0.868
AZD8055	CAL-85-1	-0.287404	-1.22901	0.750209	0.292583	61	327.62	0.39
AZD8055	RPMI-7951	-1.85717	-1.01323	0.156114	0.363044	132.55	45.44	2.326
AZD8055	23132-87	0.264418	-0.973412	1.30267	0.377792	71	468.13	0.29
AZD8055	BFTC-905	-0.761208	-0.884476	0.467102	0.41293	11.6	16.19	0.884
AZD8055	A3-KAW	-2.18916	-0.718623	0.112011	0.487423	335.16	67.17	4.352
AZD8055	COR-L279	-1.04596	-0.622795	0.351355	0.536443	52.68	40.46	1.527
AZD8055	HDLM-2	-0.733922	-0.856519	0.480023	0.424638	11.54	16.7	0.885
AZD8055	NCI-H810	0.589341	-0.876526	1.8028	0.416227	76.91	248.73	0.231
AZD8055	PANC-10-05	0.155768	-0.0824464	1.16856	0.920861	21.2	152.93	0.788
AZD8055	CCK-81	0.532686	-0.629028	1.7035	0.53311	68.71	218.09	0.313
AZD8055	EN	0.393084	-0.934146	1.48154	0.392921	73.48	337.65	0.265
AZD8055	KYM-1	-1.30236	-0.929041	0.271888	0.394932	45.26	28.67	1.453
AZD8055	OV-90	0.642967	-0.731091	1.90212	0.481384	74.69	213.71	0.253
AZD8055	PA-TU-8988T	-0.00037	-0.308029	0.99963	0.734894	26.48	83151.1	0.735
AZD8055	SNU-398	-1.39049	-1.03228	0.248952	0.356194	43.08	25.76	1.431
AZD8055	SUP-B15	-0.311364	-0.948077	0.732447	0.387485	47.1	204.49	0.529
AZD8055	AMO-1	-1.59613	-0.872425	0.20268	0.417937	106.21	45.34	2.062
AZD8055	EJM	-0.351157	-0.865446	0.703873	0.420864	40.21	146.46	0.598
AZD8055	huH-1	-0.306546	-1.33001	0.735985	0.264476	64.07	333.87	0.359
AZD8055	OCUM-1	-0.03623	-0.594375	0.964418	0.551907	42.77	1540.56	0.572
AZD8055	WM793B	-1.00888	-0.880749	0.364628	0.414472	13.67	12.7	1.137
AZD8055	OCI-AML5	0.420227	-1.47254	1.52231	0.229342	84.93	450.42	0.151
AZD8055	OV-56	-1.13396	-1.04551	0.321758	0.351513	9.25	7.8	1.092
AZD8055	SNU-C5	0.614169	-0.982897	1.84812	0.374226	79.75	260.04	0.202
AZD8186	NCI-H1650	2.26283	1.09034	9.61027	2.97528	69.04	51.82	0.31
AZD8186	SBC-5	2.21518	1.40585	9.16304	4.07898	55.48	36.54	0.445
AZD8186	HCC1143	2.0879	1.15587	8.06793	3.1768	60.62	44.64	0.394
AZD8186	EC-GI-10	2.15041	1.23246	8.58838	3.42965	60.07	42.69	0.399
AZD8186	TE-1	2.15808	1.59754	8.65449	4.94087	42.91	25.97	0.571
AZD8186	HL-60	1.81685	1.3877	6.15247	4.00563	34.89	23.62	0.651
AZD8186	A498	-0.26426	1.30972	0.767774	3.70515	382.58	595.62	4.826
AZD8186	IGROV-1	0.031504	1.18774	1.03201	3.27965	217.79	3670.11	3.178
AZD8186	SF295	1.9315	1.66648	6.89987	5.29351	23.28	13.72	0.767
AZD8186	Detroit562	2.25057	1.05838	9.49316	2.88171	69.64	52.97	0.304
AZD8186	HGC-27	0.760815	1.32371	2.14002	3.75732	75.57	73.99	1.756
AZD8186	MDA-MB-468	2.09345	1.35715	8.11282	3.88509	52.11	35.17	0.479
AZD8186	MEL-HO	1.6737	0.983943	5.33185	2.67498	49.83	41.21	0.502
AZD8186	NCI-H716	1.78885	1.40364	5.98258	4.06999	31.97	21.53	0.68
AZD8186	NCI-N87	1.9517	0.713189	7.04065	2.04049	71.02	63.46	0.29
AZD8186	RPMI-8402	1.29966	1.1296	3.66804	3.09442	15.64	13.08	0.844
AZD8186	SW1088	1.11613	1.42474	3.05303	4.15679	36.15	27.65	1.362
AZD8186	SW48	1.44786	1.0142	4.25402	2.75715	35.19	29.95	0.648
AZD8186	THP-1	1.25659	0.897502	3.51343	2.45347	30.17	28.58	0.698
AZD8186	YH-13	0.406652	0.746529	1.50178	2.10967	40.48	83.58	1.405
AZD8186	RCC10RGB	2.00661	1.21499	7.43806	3.37025	54.69	39.45	0.453
AZD8186	BFTC-909	2.10111	1.70748	8.17521	5.51507	32.54	18.73	0.675
AZD8186	RL	0.582084	0.86333	1.78976	2.37104	32.48	48.32	1.325
AZD8186	RPMI-7951	1.78658	1.05592	5.96898	2.87462	51.84	40.9	0.482
AZD8186	23132-87	0.4954	1.01499	1.64115	2.75934	68.13	104.88	1.681
AZD8186	TE-11	2.08893	0.93733	8.07627	2.55316	68.39	55.13	0.316
BI-2536	ChaGo-K-1	1.86544	-1.94429	6.45878	0.143089	97.78	204.23	0.022
BI-2536	NCI-H1650	1.67377	-1.09984	5.33223	0.332923	93.76	165.71	0.062
BI-2536	NCI-H1092	-0.652785	-2.29022	0.520594	0.101244	80.55	250.84	0.194
BI-2536	NCI-H2052	0.313531	-0.149813	1.36825	0.860869	37.08	147.78	0.629
BI-2536	SK-N-DZ	-3.1711	-2.80458	0.0419576	0.0605324	44.27	11.56	1.443
BI-2536	SBC-5	-1.93351	0.416228	0.14464	1.51623	948.28	121.53	10.483
BI-2536	Calu-6	-2.05258	-0.88688	0.128403	0.411939	220.82	56.79	3.208
BI-2536	NCI-H1792	-3.64452	1.43708	0.0261341	4.20837	16003	139.43	161.03
BI-2536	SHP-77	-3.76311	0.664826	0.0232115	1.94415	8275.8	117.67	83.758
BI-2536	HCC1143	-0.536593	0.520008	0.584737	1.68204	187.66	196.91	2.877
BI-2536	HCC1599	-4.23935	-0.314909	0.014417	0.729855	4962.46	92.57	50.625
BI-2536	EC-GI-10	-3.34851	-2.4561	0.0351366	0.0857684	144.1	26.65	2.441
BI-2536	SK-MM-2	0.96891	-2.42828	2.63507	0.0881881	96.65	350.62	0.033
BI-2536	TE-1	-2.28133	0.320916	0.102148	1.37839	1249.41	114.07	13.494
BI-2536	HCT-116	-1.47229	-1.44551	0.2294	0.235626	2.71	1.82	1.027
BI-2536	HL-60	-3.86074	0.229205	0.0210524	1.2576	5873.67	105.94	59.737
BI-2536	K-562	-1.29092	-2.12245	0.275017	0.119738	56.46	64.41	0.435
BI-2536	A498	0.850421	-0.874779	2.34063	0.416954	82.19	202.86	0.178
BI-2536	SK-MEL-5	0.893492	-0.607601	2.44365	0.544656	77.71	168	0.223
BI-2536	SW620	-3.08397	-0.787221	0.0457772	0.455108	894.18	74.47	9.942
BI-2536	IGROV-1	-2.39108	-1.48315	0.0915308	0.226922	147.92	37.97	2.479
BI-2536	SF295	-0.747416	0.752216	0.473589	2.1217	348	200.64	4.48
BI-2536	OVCAR-4	0.462301	0.460372	1.58772	1.58466	0.19	0.42	0.998
BI-2536	OVCAR-8	-2.61771	-2.42626	0.0729698	0.0883666	21.1	7.31	1.211
BI-2536	647-V	-1.82112	1.14766	0.161844	3.15082	1846.83	163.02	19.468
BI-2536	COR-L105	1.22501	-1.68113	3.40422	0.186164	94.53	237.23	0.055
BI-2536	Daoy	-3.81766	0.155744	0.0219792	1.16853	5216.51	104.08	53.165
BI-2536	D-283MED	-4.1104	-2.33302	0.0164013	0.097002	491.43	43.24	5.914
BI-2536	Detroit562	-2.98643	-1.21964	0.0504672	0.295336	485.2	59.16	5.852
BI-2536	G-361	0.174954	-0.434917	1.19119	0.647318	45.66	348.59	0.543
BI-2536	GCT	-0.517559	-1.34898	0.595974	0.259504	56.46	160.64	0.435
BI-2536	HGC-27	-2.2879	0.994904	0.10148	2.70446	2565.03	143.49	26.65
BI-2536	HSC-3	0.156839	-0.351209	1.16981	0.703837	39.83	323.93	0.602
BI-2536	HuCCT1	1.57635	-1.87901	4.83727	0.152741	96.84	219.2	0.032
BI-2536	IPC-298	-0.46412	-0.948108	0.628688	0.387473	38.37	104.28	0.616
BI-2536	KG-1	-1.57921	-0.23842	0.206138	0.787871	282.2	84.9	3.822
BI-2536	KYSE-180	-2.24146	-1.20623	0.106303	0.299323	181.57	46.19	2.816
BI-2536	KYSE-510	-1.29716	-1.48409	0.273307	0.226708	17.05	14.41	0.829
BI-2536	L-428	-2.29619	-1.91439	0.100642	0.147432	46.49	16.63	1.465
BI-2536	MEL-HO	0.885203	-1.79013	2.42348	0.166939	93.11	302.23	0.069
BI-2536	MFE-296	-0.598473	-1.59128	0.54965	0.203665	62.95	165.89	0.371
BI-2536	MKN1	-1.02054	-0.180353	0.360402	0.834975	131.68	82.33	2.317
BI-2536	NCI-H716	-1.56163	-1.41376	0.209794	0.243227	15.94	9.47	1.159
BI-2536	NCI-H358	0.844705	-2.09574	2.32729	0.12298	94.72	348.1	0.053
BI-2536	OPM-2	-4.85385	-0.271507	0.00779832	0.76223	9674.28	94.41	97.743
BI-2536	Raji	-3.52216	-1.46737	0.0295355	0.230531	680.52	58.34	7.805
BI-2536	RPMI-8402	-6.24784	-2.50452	0.00193463	0.0817151	4123.81	59.91	42.238
BI-2536	RS4-11	-4.87624	-2.33382	0.0076256	0.0969246	1171.04	52.14	12.71
BI-2536	SJSA-1	-1.21976	-1.18659	0.295301	0.305261	3.37	2.72	1.034
BI-2536	SW1088	0.468844	-0.0215126	1.59815	0.978717	38.76	104.59	0.612
BI-2536	SW48	-1.27811	-1.6941	0.278563	0.183764	34.03	32.55	0.66
BI-2536	T84	-0.792878	0.557839	0.452541	1.74689	286.02	170.36	3.86
BI-2536	TGBC11TKB	-3.85844	-1.57237	0.021101	0.207553	883.62	59.25	9.836
BI-2536	THP-1	-0.670908	-2.22741	0.511244	0.107808	78.91	232	0.211
BI-2536	U-2-OS	-0.788448	-0.226883	0.45455	0.797014	75.34	71.22	1.753
BI-2536	YH-13	-2.58387	0.072453	0.0754816	1.07514	1324.38	102.8	14.244
BI-2536	RCC10RGB	1.03251	0.538142	2.8081	1.71282	39	47.88	0.61
BI-2536	KM-H2	-3.67673	-2.58139	0.0253056	0.0756686	199.02	29.79	2.99
BI-2536	PSN1	0.043332	-0.249952	1.04428	0.778838	25.42	676.83	0.746
BI-2536	CHP-126	-2.60132	-2.48548	0.0741755	0.0832858	12.28	4.45	1.123
BI-2536	COLO-668	2.11993	-2.18918	8.33054	0.112009	98.66	203.27	0.013
BI-2536	BFTC-909	-1.49831	-1.78765	0.223506	0.167353	25.12	19.31	0.749
BI-2536	CA46	-1.91767	-0.0388444	0.146948	0.9619	554.58	97.97	6.546
BI-2536	A204	0.0881886	-2.6634	1.09219	0.0697108	93.62	3120.12	0.064
BI-2536	CAL-85-1	-0.103663	-1.32041	0.901529	0.267026	70.38	1173.75	0.296
BI-2536	RL	-4.16029	-1.26156	0.015603	0.283211	1715.1	69.68	18.151
BI-2536	RPMI-7951	-3.49165	0.180152	0.0304505	1.1974	3832.28	105.16	39.323
BI-2536	23132-87	-2.98243	-1.33382	0.0506697	0.26347	419.97	55.28	5.2
BI-2536	BFTC-905	-5.25622	-0.0808596	0.00521497	0.922323	17586.1	98.46	176.861
BI-2536	A3-KAW	-3.49403	-2.29542	0.0303781	0.100719	231.55	34.3	3.316
BI-2536	MKN45	1.32185	-1.67049	3.75035	0.188155	94.98	226.38	0.05
BI-2536	NCI-H810	-2.24671	-1.30651	0.105747	0.270762	156.05	41.85	2.56
BI-2536	PANC-10-05	0.99946	-0.0710524	2.71681	0.931413	65.72	107.11	0.343
BI-2536	TE-9	0.200268	-1.29734	1.22173	0.273259	77.63	747.8	0.224
BI-2536	TE-11	-3.02642	-0.905638	0.0484887	0.404284	733.77	70.08	8.338
BI-2536	LCLC-97TM1	-2.95802	-0.988123	0.0519219	0.372275	616.99	66.6	7.17
BI-2536	CCK-81	-2.59304	-1.02981	0.0747926	0.357073	377.42	60.29	4.774
BI-2536	KYM-1	-3.95541	-1.38724	0.0191508	0.249763	1204.19	64.93	13.042
BI-2536	OV-90	1.78463	0.892111	5.9574	2.44028	59.04	50.01	0.41
BI-2536	PA-TU-8988T	-0.519843	-1.04116	0.594614	0.353045	40.63	100.28	0.594
BI-2536	SNU-398	-2.49169	-0.939066	0.0827701	0.390993	372.38	62.31	4.724
BI-2536	AMO-1	-4.91401	-1.06242	0.00734297	0.345619	4606.8	78.38	47.068
BI-2536	EJM	-3.26476	-1.6061	0.0382062	0.20067	425.23	50.81	5.252
BI-2536	huH-1	-1.78074	-1.9277	0.168514	0.145483	13.67	8.25	0.863
BI-2536	NCI-H2444	2.12522	0.463669	8.37471	1.5899	81.02	78.18	0.19
BI-2536	NUGC-4	0.49405	-0.398591	1.63894	0.671265	59.04	180.68	0.41
BI-2536	WM793B	-1.5114	-1.06221	0.220602	0.345692	56.7	29.72	1.567
BI-2536	OCI-AML5	-3.89802	-3.38879	0.020282	0.0337493	66.4	13.06	1.664
BI-2536	SNU-C5	-2.55899	-1.9279	0.0773831	0.145453	87.97	24.66	1.88
BMS-536924	NCI-H1650	1.9792	1.25496	7.23697	3.5077	51.53	36.59	0.485
BMS-536924	SK-N-DZ	0.931472	0.827504	2.53824	2.2876	9.87	11.16	0.901
BMS-536924	NCI-H1792	0.779044	1.69242	2.17939	5.43261	149.27	117.24	2.493
BMS-536924	HPAF-II	2.22623	1.58197	9.26489	4.86455	47.49	28.94	0.525
BMS-536924	HCC1143	0.773862	1.25195	2.16812	3.49716	61.3	61.78	1.613
BMS-536924	TE-1	0.411954	1.15412	1.50976	3.17125	110.05	180.16	2.1
BMS-536924	HCT-116	1.59454	1.01365	4.92607	2.75565	44.06	36.43	0.559
BMS-536924	HL-60	-0.15958	1.40829	0.852502	4.08896	379.64	982.5	4.796
BMS-536924	A498	1.27386	1.11262	3.57464	3.04233	14.89	12.66	0.851
BMS-536924	IGROV-1	0.343534	1.26116	1.40992	3.52951	150.33	267.11	2.503
BMS-536924	OVCAR-8	2.27308	1.43577	9.70923	4.20288	56.71	36.84	0.433
BMS-536924	COR-L105	0.571988	1.19725	1.77179	3.31098	86.87	109.31	1.869
BMS-536924	D-283MED	1.41179	1.0117	4.10328	2.75027	32.97	28.34	0.67
BMS-536924	Detroit562	1.11058	1.55766	3.03611	4.74768	56.37	40.26	1.564
BMS-536924	GCT	1.98485	1.2544	7.27795	3.50573	51.83	36.8	0.482
BMS-536924	HGC-27	1.47856	1.58407	4.38662	4.87474	11.13	7.14	1.111
BMS-536924	HSC-3	1.01691	1.43378	2.76464	4.19454	51.72	40.99	1.517
BMS-536924	HuCCT1	2.24216	1.33271	9.41364	3.79131	59.73	40.56	0.403
BMS-536924	KG-1	1.80871	1.0538	6.10258	2.86852	52.99	41.74	0.47
BMS-536924	KYSE-180	1.89713	1.69259	6.66673	5.43355	18.5	10.78	0.815
BMS-536924	L-428	1.32868	0.841159	3.77606	2.31905	38.59	36.69	0.614
BMS-536924	MKN1	1.88642	1.06648	6.59573	2.90514	55.95	43.47	0.44
BMS-536924	NCI-H716	-1.00329	1.11588	0.36667	3.05227	732.43	211.22	8.324
BMS-536924	NCI-H358	1.53021	1.5985	4.61917	4.94561	7.07	4.46	1.071
BMS-536924	NCI-H28	2.10836	1.65412	8.2347	5.22846	36.51	21.54	0.635
BMS-536924	OPM-2	-0.64021	0.799182	0.527182	2.22372	321.81	224.83	4.218
BMS-536924	RPMI-8402	0.492489	1.01587	1.63638	2.76177	68.77	106.27	1.688
BMS-536924	RS4-11	1.49389	1.04476	4.45441	2.84273	36.18	30.06	0.638
BMS-536924	SJSA-1	1.15708	1.14548	3.18063	3.14394	1.15	1	0.988
BMS-536924	SW1088	1.85635	1.42621	6.40036	4.16289	34.96	23.17	0.65
BMS-536924	SW48	-0.561273	1.22657	0.570482	3.40953	497.66	318.53	5.977
BMS-536924	T84	2.16334	1.63389	8.70014	5.12379	41.11	24.47	0.589
BMS-536924	U-2-OS	1.52861	0.84424	4.61178	2.32621	49.56	44.77	0.504
BMS-536924	PSN1	1.80159	0.900689	6.05925	2.4613	59.38	50.01	0.406
BMS-536924	COLO-668	1.03414	1.31327	2.81269	3.71833	32.2	26.99	1.322
BMS-536924	BFTC-909	2.04094	1.48163	7.69786	4.40009	42.84	27.4	0.572
BMS-536924	CA46	2.24846	1.1878	9.47315	3.27984	65.38	47.17	0.346
BMS-536924	CAL-85-1	1.25263	1.10755	3.49952	3.02694	13.5	11.58	0.865
BMS-536924	RPMI-7951	1.41899	0.961741	4.13295	2.61625	36.7	32.22	0.633
BMS-536924	23132-87	2.21559	1.14756	9.16681	3.15049	65.63	48.21	0.344
BMS-536924	BFTC-905	1.05479	1.14367	2.87138	3.13826	9.29	8.43	1.093
BMS-536924	A3-KAW	0.242529	1.04309	1.27447	2.83798	122.68	330.09	2.227
BMS-536924	HDLM-2	-0.558682	1.29462	0.571962	3.6496	538.08	331.73	6.381
BMS-536924	TE-9	1.50774	1.72189	4.51652	5.59512	23.88	14.2	1.239
BMS-536924	TE-11	0.067513	0.776317	1.06984	2.17345	103.16	1049.88	2.032
BMS-536924	LCLC-97TM1	1.32219	1.50958	3.75161	4.52482	20.61	14.17	1.206
BMS-536924	CCK-81	1.17682	1.18401	3.24405	3.26746	0.72	0.61	1.007
BMS-536924	OV-90	2.0453	1.2482	7.73151	3.48405	54.94	38.97	0.451
BMS-536924	PA-TU-8988T	1.73756	1.58184	5.68344	4.86391	14.42	8.96	0.856
BMS-536924	AMO-1	-0.38396	0.916197	0.681159	2.49977	266.99	338.62	3.67
BMS-536924	huH-1	1.3355	1.34402	3.8019	3.83444	0.86	0.64	1.009
BMS-536924	OCUM-1	1.05686	1.4291	2.87732	4.17495	45.1	35.22	1.451
BMS-536924	SNU-C5	2.27663	1.12073	9.74376	3.06709	68.52	50.77	0.315
BMS-754807	ChaGo-K-1	2.18103	0.644063	8.85542	1.9042	78.5	70.47	0.215
BMS-754807	NCI-H2052	2.10105	1.55384	8.17475	4.7296	42.14	26.04	0.579
BMS-754807	SK-N-DZ	1.27573	0.147785	3.5813	1.15926	67.63	88.42	0.324
BMS-754807	SBC-5	1.02528	1.67818	2.78788	5.35579	92.11	63.68	1.921
BMS-754807	Calu-6	1.54317	1.62588	4.67941	5.0829	8.62	5.36	1.086
BMS-754807	NCI-H1792	0.920238	1.72047	2.50989	5.58714	122.61	86.96	2.226
BMS-754807	HCC1599	1.80363	0.935819	6.07164	2.5493	58.01	48.11	0.42
BMS-754807	TE-1	0.584359	0.924418	1.79384	2.5204	40.5	58.19	1.405
BMS-754807	HCT-116	1.55519	0.662115	4.736	1.93889	59.06	57.43	0.409
BMS-754807	HL-60	-0.497059	1.57339	0.608317	4.82299	692.84	416.54	7.928
BMS-754807	SW620	1.30389	1.27431	3.68361	3.57624	2.91	2.27	0.971
BMS-754807	IGROV-1	0.816318	1.05957	2.26216	2.88513	27.54	29.8	1.275
BMS-754807	SF295	2.24019	1.48879	9.39515	4.43172	52.83	33.54	0.472
BMS-754807	Detroit562	-0.074668	1.31146	0.928052	3.71158	299.93	1856.39	3.999
BMS-754807	HGC-27	0.053788	1.77221	1.05526	5.88382	457.57	3194.8	5.576
BMS-754807	HSC-3	1.01944	0.772776	2.77164	2.16577	21.86	24.2	0.781
BMS-754807	KG-1	0.55278	0.02547	1.73808	1.0258	40.98	95.39	0.59
BMS-754807	MDA-MB-468	0.55621	0.256782	1.74405	1.29276	25.88	53.83	0.741
BMS-754807	NCI-H716	-2.31659	1.66166	0.0986095	5.26803	5242.32	171.73	53.423
BMS-754807	NCI-H358	0.916034	1.18824	2.49936	3.28129	31.29	29.72	1.313
BMS-754807	OPM-2	-0.849515	0.321207	0.427622	1.37879	222.43	137.81	3.224
BMS-754807	P31-FUJ	0.24427	0.351408	1.27669	1.42107	11.31	43.86	1.113
BMS-754807	RPMI-8402	0.0357246	0.358512	1.03637	1.4312	38.1	903.54	1.381
BMS-754807	RS4-11	-0.277353	0.327246	0.757787	1.38714	83.05	217.99	1.831
BMS-754807	SW1088	2.07851	1.36168	7.99257	3.90274	51.17	34.49	0.488
BMS-754807	SW48	-2.17089	0.828799	0.114075	2.29057	1907.94	138.18	20.079
BMS-754807	T84	1.49175	1.90681	4.44486	6.7316	51.45	27.82	1.514
BMS-754807	YH-13	1.88629	0.721132	6.59486	2.05676	68.81	61.77	0.312
BMS-754807	KM-H2	2.07006	0.455176	7.92528	1.57645	80.11	78.01	0.199
BMS-754807	CHP-126	1.50651	0.938526	4.51098	2.55621	43.33	37.7	0.567
BMS-754807	RL	2.02353	0.133835	7.56497	1.1432	84.89	93.39	0.151
BMS-754807	RPMI-7951	1.36244	1.12237	3.9057	3.07214	21.34	17.62	0.787
BMS-754807	BFTC-905	-0.319577	1.08881	0.726456	2.97074	308.94	440.7	4.089
BMS-754807	A3-KAW	0.014758	1.13803	1.01487	3.1206	207.49	7611.25	3.075
BMS-754807	COR-L279	0.743736	1.25522	2.10378	3.5086	66.78	68.77	1.668
BMS-754807	MKN45	1.23068	1.24694	3.42356	3.47967	1.64	1.32	1.016
BMS-754807	TE-11	-2.26843	0.386517	0.103475	1.47185	1322.42	117.04	14.224
BMS-754807	LCLC-97TM1	0.278474	1.77671	1.32111	5.91038	347.38	538.02	4.474
BMS-754807	CCK-81	1.07049	1.00212	2.91681	2.72405	6.61	6.39	0.934
BMS-754807	EN	2.22551	0.965344	9.25816	2.62569	71.64	56.62	0.284
BMS-754807	KYM-1	1.69043	1.62342	5.42182	5.07038	6.48	3.96	0.935
BMS-754807	SUP-B15	1.1787	0.157726	3.25014	1.17085	63.98	86.62	0.36
BMS-754807	AMO-1	-0.997734	0.322785	0.368714	1.38097	274.54	132.35	3.745
BMS-754807	EJM	2.15448	0.674527	8.6234	1.9631	77.24	68.69	0.228
BMS-754807	huH-1	0.0691592	0.924475	1.07161	2.52055	135.21	1236.73	2.352
BMS-754807	OCI-AML5	-1.31699	0.691885	0.267941	1.99748	645.49	152.54	7.455
Bosutinib	K-562	-1.89101	0.220214	0.15092	1.24634	725.83	111.65	8.258
Bosutinib	IGROV-1	0.167114	0.218191	1.18189	1.24382	5.24	30.56	1.052
Bosutinib	P31-FUJ	0.396076	-0.122263	1.48598	0.884915	40.45	130.87	0.596
Bosutinib	RPMI-8402	0.406499	-0.173671	1.50155	0.840573	44.02	142.72	0.56
Bosutinib	BFTC-905	0.164293	0.899552	1.17856	2.4585	108.6	447.53	2.086
Bosutinib	A3-KAW	-0.333418	-0.103111	0.716471	0.902027	25.9	69.07	1.259
Bosutinib	SUP-B15	-0.864093	-2.34373	0.421434	0.0959688	77.23	171.24	0.228
Bosutinib	OCI-AML5	0.582244	-2.5753	1.79005	0.076131	95.75	542.31	0.043
Bromosporine	HL-60	0.197511	1.25242	1.21837	3.49881	187.17	534.1	2.872
Bromosporine	OPM-2	-0.088631	0.648131	0.915183	1.91196	108.92	831.27	2.089
Bromosporine	ST486	-0.274805	0.431792	0.75972	1.54001	102.71	257.13	2.027
Bromosporine	A3-KAW	-0.270552	0.619711	0.762958	1.85839	143.58	329.05	2.436
Bromosporine	KYM-1	0.440533	0.70235	1.55354	2.01849	29.93	59.43	1.299
Bromosporine	SUP-B15	0.398955	0.810302	1.49027	2.24859	50.88	103.11	1.509
Bromosporine	AMO-1	0.404204	0.605867	1.49811	1.83284	22.34	49.89	1.223
Buparlisib	ChaGo-K-1	0.722968	0.334227	2.06054	1.39686	32.21	53.77	0.678
Buparlisib	NCI-H1650	1.75	1.01454	5.75459	2.75809	52.07	42.03	0.479
Buparlisib	NCI-H1092	1.50263	0.645566	4.49349	1.90707	57.56	57.04	0.424
Buparlisib	NCI-H2052	1.46592	1.23439	4.33153	3.43628	20.67	15.79	0.793
Buparlisib	SK-N-DZ	0.309932	0.403172	1.36333	1.49656	9.77	30.08	1.098
Buparlisib	SBC-5	0.0443208	0.983422	1.04532	2.67359	155.77	2118.87	2.558
Buparlisib	Calu-6	1.3242	1.23166	3.75919	3.42692	8.84	6.99	0.912
Buparlisib	NCI-H1792	0.401146	1.33561	1.49354	3.80233	154.59	232.95	2.546
Buparlisib	HPAF-II	1.39837	1.32773	4.04858	3.77249	6.82	5.05	0.932
Buparlisib	SHP-77	0.701568	0.657219	2.01691	1.92942	4.34	6.32	0.957
Buparlisib	HCC1954	0.673909	0.911376	1.96189	2.48774	26.8	35.24	1.268
Buparlisib	HCC1143	0.570814	0.468568	1.76971	1.5977	9.72	17.91	0.903
Buparlisib	HCC1599	0.783546	0.59216	2.18922	1.80789	17.42	24.43	0.826
Buparlisib	EC-GI-10	0.268021	0.790446	1.30737	2.20438	68.61	194.92	1.686
Buparlisib	SK-MM-2	2.28003	0.868269	9.77695	2.38278	75.63	61.92	0.244
Buparlisib	TE-1	0.949571	0.750924	2.5846	2.11896	18.02	20.92	0.82
Buparlisib	HCT-116	0.5718	0.569979	1.77145	1.76823	0.18	0.32	0.998
Buparlisib	HL-60	0.361896	1.39283	1.43605	4.02624	180.37	284.87	2.804
Buparlisib	K-562	0.866454	0.454898	2.37846	1.57601	33.74	47.5	0.663
Buparlisib	A498	1.05185	0.966517	2.86293	2.62877	8.18	8.11	0.918
Buparlisib	SK-MEL-2	1.57144	1.07658	4.81357	2.93461	39.03	31.49	0.61
Buparlisib	SK-MEL-5	1.28102	0.731889	3.60031	2.079	42.25	42.87	0.577
Buparlisib	SW620	1.49137	0.871223	4.44317	2.38983	46.21	41.58	0.538
Buparlisib	IGROV-1	-1.08003	0.452556	0.339586	1.57233	363.01	141.9	4.63
Buparlisib	SF295	1.55064	1.07473	4.71448	2.92921	37.87	30.69	0.621
Buparlisib	OVCAR-4	2.18845	1.14791	8.92133	3.15161	64.67	47.55	0.353
Buparlisib	OVCAR-8	0.773659	0.57916	2.16768	1.78454	17.68	25.14	0.823
Buparlisib	647-V	1.1196	1.54868	3.06363	4.70525	53.58	38.32	1.536
Buparlisib	COR-L105	0.629464	0.71826	1.8766	2.05086	9.29	14.11	1.093
Buparlisib	Daoy	0.593697	0.755411	1.81067	2.12849	17.55	27.24	1.176
Buparlisib	D-283MED	-0.395888	0.347809	0.673082	1.41596	110.37	187.86	2.104
Buparlisib	Detroit562	0.39634	0.740733	1.48637	2.09747	41.11	86.89	1.411
Buparlisib	G-361	0.800767	0.628968	2.22725	1.87567	15.79	21.45	0.842
Buparlisib	GCT	1.64458	1.18463	5.17881	3.26946	36.87	27.97	0.631
Buparlisib	HGC-27	-0.648184	1.43384	0.522995	4.19478	702.07	321.21	8.021
Buparlisib	HSC-3	0.587822	0.489497	1.80006	1.6315	9.36	16.73	0.906
Buparlisib	HuCCT1	0.768001	0.467749	2.15545	1.5964	25.94	39.1	0.741
Buparlisib	HuH-7	2.16322	0.968341	8.69911	2.63357	69.73	55.24	0.303
Buparlisib	IPC-298	1.80219	0.24214	6.06293	1.27397	78.99	86.56	0.21
Buparlisib	KG-1	0.711522	0.129168	2.03709	1.13788	44.14	81.85	0.559
Buparlisib	KYSE-180	1.04928	1.31454	2.85558	3.72304	30.38	25.28	1.304
Buparlisib	KYSE-510	0.93535	0.314447	2.54811	1.3695	46.25	66.38	0.537
Buparlisib	L-428	0.334681	0.256958	1.39749	1.29299	7.48	23.22	0.925
Buparlisib	MDA-MB-468	1.18335	0.269221	3.26531	1.30894	59.91	77.25	0.401
Buparlisib	MEL-HO	1.64992	0.290456	5.20658	1.33704	74.32	82.4	0.257
Buparlisib	MFE-296	1.90223	0.357002	6.70081	1.42904	78.67	81.23	0.213
Buparlisib	MKN1	0.863082	0.718424	2.37046	2.0512	13.47	16.76	0.865
Buparlisib	NCI-H716	1.4993	0.97827	4.47855	2.65985	40.61	34.75	0.594
Buparlisib	NCI-N87	1.03796	0.0391626	2.82345	1.03994	63.17	96.23	0.368
Buparlisib	NCI-H358	1.81277	0.982828	6.12741	2.672	56.39	45.78	0.436
Buparlisib	OPM-2	0.559263	0.561862	1.74938	1.75394	0.26	0.46	1.003
Buparlisib	P31-FUJ	0.497666	0.328314	1.64488	1.38862	15.58	34.03	0.844
Buparlisib	Raji	0.656018	0.935239	1.9271	2.54782	32.21	42.56	1.322
Buparlisib	RPMI-8402	-1.18533	0.363853	0.305647	1.43886	370.76	130.7	4.708
Buparlisib	RS4-11	0.287242	0.238876	1.33275	1.26982	4.72	16.84	0.953
Buparlisib	SJSA-1	0.895202	0.559238	2.44783	1.74934	28.54	37.53	0.715
Buparlisib	SW1088	0.764275	1.261	2.14744	3.52894	64.33	64.99	1.643
Buparlisib	SW48	0.420164	0.410298	1.52221	1.50727	0.98	2.35	0.99
Buparlisib	T84	1.2647	1.50717	3.54204	4.51394	27.44	19.17	1.274
Buparlisib	TGBC11TKB	1.13761	0.418049	3.11931	1.519	51.3	63.25	0.487
Buparlisib	THP-1	0.690424	0.09029	1.99456	1.09449	45.13	86.92	0.549
Buparlisib	U-2-OS	1.61634	1.00431	5.03462	2.73003	45.77	37.86	0.542
Buparlisib	YH-13	0.347634	0.487487	1.41571	1.62822	15.01	40.23	1.15
Buparlisib	RCC10RGB	2.19865	0.876358	9.01282	2.40214	73.35	60.14	0.267
Buparlisib	KM-H2	0.202412	0.57284	1.22435	1.7733	44.84	183.01	1.448
Buparlisib	PSN1	1.45359	0.667186	4.27843	1.94875	54.45	54.1	0.455
Buparlisib	COLO-668	1.89379	1.18505	6.64448	3.27084	50.77	37.42	0.492
Buparlisib	BFTC-909	-0.338213	1.06695	0.713044	2.90651	307.62	415.47	4.076
Buparlisib	CA46	0.673239	0.143804	1.96058	1.15466	41.11	78.64	0.589
Buparlisib	A204	0.867691	0.698023	2.38141	2.00978	15.61	19.55	0.844
Buparlisib	CAL-85-1	1.34674	0.219643	3.84487	1.24563	67.6	83.69	0.324
Buparlisib	RL	0.614593	0.36106	1.8489	1.43485	22.39	41.25	0.776
Buparlisib	RPMI-7951	0.490772	0.691286	1.63358	1.99628	22.2	40.86	1.222
Buparlisib	ST486	0.517176	0.141075	1.67728	1.15151	31.35	72.72	0.687
Buparlisib	23132-87	-0.051021	0.295288	0.950259	1.34351	41.38	678.76	1.414
Buparlisib	BFTC-905	0.343396	0.601065	1.40973	1.82406	29.39	75.04	1.294
Buparlisib	A3-KAW	0.0266146	0.721934	1.02697	2.05841	100.43	2612.55	2.004
Buparlisib	COR-L279	0.74024	0.889375	2.09644	2.43361	16.08	20.15	1.161
Buparlisib	HDLM-2	0.385312	0.975612	1.47007	2.65279	80.45	153.2	1.805
Buparlisib	MKN45	1.11042	0.804783	3.03562	2.23621	26.33	27.52	0.737
Buparlisib	NCI-H810	2.29436	0.395391	9.91811	1.48496	85.03	82.77	0.15
Buparlisib	PANC-10-05	2.29215	1.60371	9.89615	4.97146	49.76	30.03	0.502
Buparlisib	TE-9	1.08228	0.991317	2.95141	2.69478	8.7	8.41	0.913
Buparlisib	TE-11	0.253149	0.422101	1.28808	1.52516	18.41	66.74	1.184
Buparlisib	LCLC-97TM1	1.20654	0.765773	3.34192	2.15066	35.65	36.53	0.644
Buparlisib	CCK-81	0.675281	0.58942	1.96459	1.80294	8.23	12.71	0.918
Buparlisib	EN	1.13657	0.397678	3.11605	1.48836	52.24	65.01	0.478
Buparlisib	KYM-1	-0.162805	1.04996	0.849757	2.85753	236.28	744.92	3.363
Buparlisib	PA-TU-8988T	0.775683	1.12725	2.17208	3.08714	42.13	45.32	1.421
Buparlisib	SNU-398	0.861765	0.568224	2.36734	1.76513	25.44	34.06	0.746
Buparlisib	SUP-B15	1.02363	0.597424	2.78329	1.81743	34.7	41.64	0.653
Buparlisib	AMO-1	-0.755116	0.487816	0.469956	1.62876	246.58	164.6	3.466
Buparlisib	EJM	1.7103	0.750664	5.53063	2.11841	61.7	56.11	0.383
Buparlisib	huH-1	1.09866	0.434052	3.00013	1.5435	48.55	60.49	0.514
Buparlisib	NCI-H1568	1.94038	0.745149	6.96142	2.10675	69.74	61.6	0.303
Buparlisib	OCUM-1	2.05269	1.3253	7.78882	3.76331	51.68	35.44	0.483
Buparlisib	WM793B	0.835919	0.441316	2.30693	1.55475	32.61	47.21	0.674
Buparlisib	SNU-C5	0.564466	0.298152	1.75851	1.34737	23.38	47.18	0.766
Camptothecin	SK-N-DZ	-3.70315	-3.57089	0.0246458	0.0281308	14.14	3.57	1.141
Camptothecin	SBC-5	-3.46292	-2.4816	0.0313382	0.0836095	166.8	28.34	2.668
Camptothecin	NCI-H1792	-3.23191	-2.85777	0.039482	0.0573965	45.37	11.58	1.454
Camptothecin	HCC1599	-3.24691	-3.2606	0.038894	0.0383654	1.36	0.42	0.986
Camptothecin	EC-GI-10	-3.12566	-3.06334	0.0439078	0.0467316	6.43	1.99	1.064
Camptothecin	J82	-3.04412	-4.04634	0.0476381	0.0174863	63.29	32.92	0.367
Camptothecin	SK-MM-2	-2.35312	-4.92421	0.0950718	0.00726844	92.35	109.26	0.076
Camptothecin	HCT-116	-2.98543	-3.23826	0.050518	0.039232	22.34	8.47	0.777
Camptothecin	HL-60	-4.47261	-1.95114	0.0114175	0.142111	1144.68	56.38	12.447
Camptothecin	SW620	-3.18254	-3.84231	0.0414804	0.021444	48.3	20.73	0.517
Camptothecin	SF295	-4.14539	-3.49725	0.0158373	0.0302806	91.2	15.64	1.912
Camptothecin	OVCAR-8	-3.18246	-4.73117	0.0414835	0.00881612	78.75	48.66	0.213
Camptothecin	647-V	-4.578	-1.84597	0.0102754	0.157871	1436.4	59.68	15.364
Camptothecin	Daoy	-4.41361	-2.13408	0.0121113	0.118354	877.22	51.65	9.772
Camptothecin	D-283MED	-4.52823	-3.82847	0.0107998	0.0217429	101.33	15.45	2.013
Camptothecin	Detroit562	-2.82319	-3.5987	0.0594159	0.0273593	53.95	27.47	0.46
Camptothecin	GCT	-2.93363	-2.83197	0.0532038	0.0588965	10.7	3.47	1.107
Camptothecin	HGC-27	-2.88598	-3.28851	0.0557998	0.0373095	33.14	13.95	0.669
Camptothecin	HSC-3	-3.9532	-3.41669	0.0191932	0.0328208	71	13.57	1.71
Camptothecin	KG-1	-3.40149	-4.62461	0.0333236	0.00980749	70.57	35.96	0.294
Camptothecin	KYSE-510	-2.57385	-3.46602	0.0762418	0.0312411	59.02	34.66	0.41
Camptothecin	L-428	-3.45107	-4.55953	0.0317117	0.010467	66.99	32.12	0.33
Camptothecin	MDA-MB-468	-2.5123	-4.13873	0.0810815	0.0159432	80.34	64.74	0.197
Camptothecin	OPM-2	-2.50027	-3.72676	0.0820627	0.0240706	70.67	49.05	0.293
Camptothecin	P31-FUJ	-3.40397	-3.55084	0.0332412	0.0287006	13.66	4.31	0.863
Camptothecin	Raji	-4.48605	-3.73341	0.011265	0.0239111	112.26	16.78	2.123
Camptothecin	RPMI-8402	-5.17386	-4.6086	0.00566265	0.00996576	75.99	10.93	1.76
Camptothecin	RS4-11	-4.64661	-3.91817	0.00959405	0.0198773	107.18	15.68	2.072
Camptothecin	SW48	-3.64499	-4.01171	0.0261218	0.0181023	30.7	10.06	0.693
Camptothecin	THP-1	-2.70676	-4.92882	0.066753	0.00723504	89.16	82.09	0.108
Camptothecin	KM-H2	-3.29251	-3.65412	0.0371606	0.0258843	30.34	10.98	0.697
Camptothecin	PSN1	-2.61346	-3.2191	0.0732808	0.0399911	45.43	23.17	0.546
Camptothecin	CHP-126	-4.26927	-5.08791	0.013992	0.00617088	55.9	19.18	0.441
Camptothecin	COLO-668	-3.53566	-3.85751	0.0291396	0.0211206	27.52	9.1	0.725
Camptothecin	BFTC-909	-2.877	-3.38478	0.0563037	0.033885	39.82	17.65	0.602
Camptothecin	A204	-2.31068	-4.75093	0.099194	0.00864363	91.29	105.61	0.087
Camptothecin	RL	-3.56785	-4.33318	0.0282165	0.0131257	53.48	21.45	0.465
Camptothecin	RPMI-7951	-4.0443	-2.60108	0.017522	0.0741936	323.43	35.69	4.234
Camptothecin	ST486	-3.42767	-4.31854	0.0324623	0.0133193	58.97	25.99	0.41
Camptothecin	23132-87	-2.75699	-3.56153	0.0634824	0.0283954	55.27	29.18	0.447
Camptothecin	BFTC-905	-4.20811	-4.01016	0.0148745	0.0181305	21.89	4.7	1.219
Camptothecin	A3-KAW	-5.309	-3.48057	0.0049469	0.0307899	522.41	34.44	6.224
Camptothecin	COR-L279	-4.87791	-3.49948	0.00761294	0.030213	296.86	28.26	3.969
Camptothecin	HDLM-2	-2.58977	-3.07173	0.0750376	0.0463409	38.24	18.61	0.618
Camptothecin	TE-11	-3.1936	-3.56386	0.0410239	0.0283292	30.94	11.59	0.691
Camptothecin	CCK-81	-2.54915	-3.53367	0.0781481	0.0291976	62.64	38.62	0.374
Camptothecin	KYM-1	-4.6487	-3.66702	0.00957404	0.0255524	166.89	21.12	2.669
Camptothecin	SUP-B15	-5.02201	-4.57318	0.00659129	0.0103251	56.65	8.94	1.566
Camptothecin	AMO-1	-3.47628	-4.6325	0.0309221	0.00973042	68.53	33.26	0.315
Camptothecin	EJM	-2.62163	-3.60806	0.0726842	0.0271044	62.71	37.63	0.373
Camptothecin	OCUM-1	-2.44835	-2.39646	0.0864364	0.0910395	5.33	2.12	1.053
Camptothecin	WM793B	-3.15874	-3.83571	0.0424794	0.0215861	49.18	21.43	0.508
Camptothecin	OCI-AML5	-4.25333	-5.12884	0.0142168	0.0059234	58.34	20.58	0.417
Camptothecin	SNU-C5	-2.42072	-3.64822	0.0888577	0.0260374	70.7	50.71	0.293
Cediranib	NCI-H1650	0.906666	1.61281	2.47605	5.01686	102.62	77.88	2.026
Cediranib	SK-N-DZ	1.70507	1.57497	5.50177	4.83058	12.2	7.63	0.878
Cediranib	SBC-5	1.76228	1.74364	5.8257	5.7181	1.85	1.06	0.982
Cediranib	NCI-H1792	1.58881	1.84641	4.89792	6.337	29.38	16.21	1.294
Cediranib	SHP-77	1.43406	1.8796	4.19571	6.5509	56.13	31.07	1.561
Cediranib	HCC1599	2.26404	1.50641	9.62191	4.51052	53.12	33.46	0.469
Cediranib	EC-GI-10	1.68989	1.56343	5.41886	4.77519	11.88	7.48	0.881
Cediranib	TE-1	1.21814	1.7367	3.38088	5.67859	67.96	42.57	1.68
Cediranib	HCT-116	1.98593	1.65738	7.28583	5.24553	28	16.54	0.72
Cediranib	HL-60	1.93961	1.95246	6.95605	7.04601	1.29	0.66	1.013
Cediranib	K-562	1.75092	1.977	5.75991	7.22107	25.37	12.91	1.254
Cediranib	A498	0.931767	1.7723	2.53899	5.8844	131.76	90.21	2.318
Cediranib	SK-MEL-2	1.68323	1.61411	5.38293	5.02339	6.68	4.11	0.933
Cediranib	IGROV-1	0.0063252	1.7293	1.00635	5.63668	460.11	27239.8	5.601
Cediranib	OVCAR-8	2.21627	1.7947	9.17303	6.01766	34.4	19.02	0.656
Cediranib	647-V	1.90107	1.77599	6.69308	5.90611	11.76	6.58	0.882
Cediranib	COR-L105	0.45878	1.70192	1.58214	5.48448	246.65	270.97	3.466
Cediranib	Daoy	1.95256	1.38099	7.04669	3.97885	43.54	29.27	0.565
Cediranib	D-283MED	0.74166	1.50458	2.09942	4.50228	114.45	102.87	2.145
Cediranib	Detroit562	1.85451	1.60855	6.38857	4.99554	21.8	13.26	0.782
Cediranib	G-361	2.13086	1.76388	8.42207	5.83505	30.72	17.22	0.693
Cediranib	GCT	2.21162	1.929	9.13053	6.88264	24.62	12.78	0.754
Cediranib	HGC-27	1.55675	2.19322	4.74337	8.96407	88.98	40.88	1.89
Cediranib	HSC-3	1.5808	1.58763	4.85883	4.89215	0.69	0.43	1.007
Cediranib	HuCCT1	1.98953	1.8294	7.31211	6.23015	14.8	8.05	0.852
Cediranib	HuH-7	1.74868	1.88792	5.74702	6.60559	14.94	7.96	1.149
Cediranib	IPC-298	2.19104	1.6609	8.94455	5.26405	41.15	24.2	0.589
Cediranib	KG-1	1.60254	1.62567	4.96565	5.08184	2.34	1.44	1.023
Cediranib	KYSE-180	1.6396	1.87736	5.1531	6.53625	26.84	14.5	1.268
Cediranib	L-428	1.69516	1.67718	5.44752	5.35046	1.78	1.06	0.982
Cediranib	MDA-MB-468	1.88939	1.83956	6.61531	6.29376	4.86	2.64	0.951
Cediranib	MEL-HO	2.03521	1.47899	7.6539	4.38851	42.66	27.33	0.573
Cediranib	MKN1	1.47566	1.83604	4.37394	6.27162	43.39	24.42	1.434
Cediranib	NCI-H716	-1.78736	1.71527	0.167401	5.55816	3220.27	195.97	33.203
Cediranib	NCI-H358	2.24607	1.89004	9.45051	6.61965	29.95	15.85	0.7
Cediranib	OPM-2	-0.0187748	1.57491	0.9814	4.83031	392.19	8488.43	4.922
Cediranib	P31-FUJ	2.00471	1.44583	7.42396	4.24538	42.82	27.88	0.572
Cediranib	Raji	1.63949	1.58234	5.15255	4.86635	5.55	3.49	0.944
Cediranib	RPMI-8402	0.792516	1.45974	2.20895	4.30482	94.88	84.19	1.949
Cediranib	SJSA-1	1.73494	1.60473	5.66861	4.97654	12.21	7.51	0.878
Cediranib	SW1088	1.35446	1.97329	3.87467	7.19433	85.68	45.69	1.857
Cediranib	SW48	1.05822	1.64589	2.88124	5.18561	79.98	55.53	1.8
Cediranib	T84	1.63451	2.01046	5.12695	7.46678	45.64	23	1.456
Cediranib	THP-1	1.97135	1.36188	7.18035	3.90351	45.64	30.92	0.544
Cediranib	U-2-OS	1.42789	1.98444	4.16987	7.27496	74.46	38.98	1.745
Cediranib	YH-13	1.07462	1.45859	2.92889	4.29991	46.81	35.73	1.468
Cediranib	CHP-126	1.43184	1.66782	4.1864	5.30059	26.61	16.48	1.266
Cediranib	COLO-668	2.02696	1.90368	7.59096	6.71054	11.6	6.08	0.884
Cediranib	BFTC-909	1.67996	1.66501	5.36533	5.28574	1.48	0.89	0.985
Cediranib	CA46	2.02301	1.42079	7.56108	4.14041	45.24	29.77	0.548
Cediranib	A204	-0.598813	1.46853	0.549463	4.34286	690.38	345.24	7.904
Cediranib	CAL-85-1	2.27179	1.74687	9.69672	5.73663	40.84	23.11	0.592
Cediranib	RL	1.81811	1.52473	6.16019	4.59391	25.43	16.14	0.746
Cediranib	RPMI-7951	1.98743	1.77184	7.29679	5.88167	19.39	10.85	0.806
Cediranib	ST486	1.38948	1.60983	4.01278	5.00196	24.65	15.86	1.247
Cediranib	23132-87	1.63616	1.60978	5.13541	5.00172	2.6	1.61	0.974
Cediranib	BFTC-905	1.58	1.66829	4.85493	5.3031	9.23	5.59	1.092
Cediranib	A3-KAW	1.76587	1.73419	5.84666	5.66437	3.12	1.79	0.969
Cediranib	COR-L279	1.10697	1.72918	3.02519	5.63601	86.3	56.21	1.863
Cediranib	HDLM-2	2.18759	1.65312	8.91371	5.22323	41.4	24.43	0.586
Cediranib	NCI-H810	1.70537	1.58482	5.5034	4.87843	11.36	7.07	0.886
Cediranib	TE-11	1.41615	1.4447	4.12121	4.24059	2.9	2.02	1.029
Cediranib	CCK-81	0.986153	1.81592	2.6809	6.14676	129.28	84.14	2.293
Cediranib	KYM-1	1.34378	1.87974	3.83351	6.55182	70.91	39.88	1.709
Cediranib	PA-TU-8988T	2.24853	2.1122	9.4738	8.26643	12.74	6.06	0.873
Cediranib	AMO-1	1.78203	1.7448	5.94189	5.72478	3.65	2.09	0.963
Cediranib	NUGC-4	1.46203	1.85078	4.31469	6.36476	47.51	26.59	1.475
Cediranib	WM793B	2.17664	1.55042	8.81662	4.71344	46.54	28.77	0.535
CHIR-99021	RL	2.16989	1.04747	8.75729	2.85043	67.45	51.73	0.325
Crizotinib	SK-N-DZ	1.13855	1.61657	3.12223	5.03577	61.29	41.99	1.613
Crizotinib	SBC-5	1.6447	1.97438	5.17945	7.20215	39.05	20.05	1.391
Crizotinib	NCI-H1792	1.58075	2.26801	4.85859	9.66016	98.83	43.48	1.988
Crizotinib	HCC1599	2.13458	1.79489	8.45353	6.01884	28.8	15.91	0.712
Crizotinib	EC-GI-10	2.2009	1.73257	9.03313	5.6552	37.39	21.28	0.626
Crizotinib	HCT-116	1.13213	1.80936	3.10225	6.10654	96.84	59.82	1.968
Crizotinib	HL-60	2.02268	2.13107	7.55855	8.42389	11.45	5.36	1.114
Crizotinib	K-562	0.3727	2.02645	1.45165	7.58711	422.65	443.72	5.227
Crizotinib	D-283MED	0.692298	1.50089	1.9983	4.48567	124.47	116.8	2.245
Crizotinib	Detroit562	1.09203	1.99614	2.98033	7.36062	146.97	82.79	2.47
Crizotinib	G-361	1.96218	2.03408	7.11482	7.64518	7.45	3.66	1.075
Crizotinib	HGC-27	1.19567	2.33741	3.30576	10.3544	213.22	95.49	3.132
Crizotinib	HSC-3	1.97507	1.50991	7.20712	4.52631	37.2	23.55	0.628
Crizotinib	L-428	2.13127	1.46004	8.42553	4.30614	48.89	31.49	0.511
Crizotinib	MDA-MB-468	1.60186	1.82413	4.96224	6.19739	24.89	13.88	1.249
Crizotinib	NCI-H716	1.20222	1.94656	3.32751	7.00454	110.5	61.91	2.105
Crizotinib	OPM-2	0.992639	1.50107	2.69835	4.48649	66.27	51.22	1.663
Crizotinib	P31-FUJ	0.162014	1.45624	1.17588	4.28979	264.82	798.83	3.648
Crizotinib	RPMI-8402	0.159556	1.54791	1.17299	4.70161	300.82	870.13	4.008
Crizotinib	RS4-11	0.380712	1.70373	1.46333	5.49443	275.48	347.51	3.755
Crizotinib	SW1088	2.11726	2.25649	8.30836	9.54953	14.94	6.58	1.149
Crizotinib	SW48	0.592654	1.7979	1.80878	6.03693	233.76	203.36	3.338
Crizotinib	KM-H2	2.23226	1.46698	9.32092	4.33612	53.48	34.28	0.465
Crizotinib	CHP-126	1.72921	1.92262	5.6362	6.83885	21.34	11.18	1.213
Crizotinib	COLO-668	2.08128	2.09474	8.01471	8.1233	1.35	0.65	1.014
Crizotinib	CA46	2.13602	1.55181	8.46566	4.72	44.25	27.35	0.558
Crizotinib	CAL-85-1	2.24892	1.83256	9.47746	6.24986	34.06	18.51	0.659
Crizotinib	RPMI-7951	1.77196	1.91663	5.8824	6.79804	15.57	8.16	1.156
Crizotinib	ST486	0.441351	1.57303	1.55481	4.82123	210.09	256.41	3.101
Crizotinib	BFTC-905	1.19708	1.84573	3.31045	6.33272	91.29	54.19	1.913
Crizotinib	A3-KAW	1.00489	1.87124	2.7316	6.49632	137.82	86.21	2.378
Crizotinib	COR-L279	1.47258	2.05657	4.36047	7.81912	79.32	39.66	1.793
Crizotinib	MKN45	-2.03047	1.69138	0.131274	5.42696	4034.08	183.3	41.341
Crizotinib	TE-11	1.14074	1.54976	3.12908	4.71035	50.53	35.86	1.505
Crizotinib	LCLC-97TM1	1.79189	2.15078	6.00077	8.59159	43.17	20.03	1.432
Crizotinib	CCK-81	1.83387	1.93645	6.25803	6.93406	10.8	5.59	1.108
Crizotinib	KYM-1	1.27892	2.1172	3.59276	8.30784	131.24	65.55	2.312
Crizotinib	SUP-B15	0.44699	1.1946	1.5636	3.30223	111.19	167.25	2.112
Crizotinib	AMO-1	0.817564	1.88039	2.26498	6.55604	189.45	130	2.895
Crizotinib	EJM	2.21791	1.77484	9.18807	5.89935	35.79	19.98	0.642
Crizotinib	OCI-AML5	0.486921	0.352072	1.6273	1.42201	12.62	27.69	0.874
Cytarabine	SK-N-DZ	-0.925485	-0.553705	0.396339	0.574816	45.03	40.17	1.45
Cytarabine	SBC-5	0.155014	0.93482	1.16767	2.54676	118.1	503.06	2.181
Cytarabine	EC-GI-10	0.294296	-0.110547	1.34218	0.895344	33.29	137.56	0.667
Cytarabine	HCT-116	-1.80507	-0.0289244	0.164463	0.97149	490.7	98.4	5.907
Cytarabine	HL-60	0.250847	0.138347	1.28511	1.14837	10.64	44.85	0.894
Cytarabine	IGROV-1	0.166615	-0.248241	1.1813	0.780172	33.96	248.99	0.66
Cytarabine	OVCAR-8	-1.41312	-0.0365412	0.243383	0.964118	296.13	97.41	3.961
Cytarabine	Daoy	0.409102	0.509538	1.50547	1.66452	10.57	24.55	1.106
Cytarabine	D-283MED	-1.53057	-0.386955	0.216412	0.679122	213.81	74.72	3.138
Cytarabine	HSC-3	-1.67771	0.40043	0.186802	1.49247	698.96	123.87	7.99
Cytarabine	KG-1	-0.145275	-0.0450414	0.864784	0.955958	10.54	69	1.105
Cytarabine	L-428	-0.940161	-0.183077	0.390565	0.832704	113.21	80.53	2.132
Cytarabine	OPM-2	0.420702	0.02802	1.52303	1.02842	32.48	93.34	0.675
Cytarabine	Raji	-1.31393	-0.159032	0.268761	0.852969	217.37	87.9	3.174
Cytarabine	RPMI-8402	-3.93173	-0.249604	0.0196098	0.779109	3873.06	93.65	39.731
Cytarabine	RS4-11	-2.00898	-0.16763	0.134126	0.845666	530.5	91.66	6.305
Cytarabine	SJSA-1	0.27417	-0.0503684	1.31544	0.950879	27.71	118.37	0.723
Cytarabine	YH-13	0.56428	0.2997	1.75818	1.34945	23.25	46.89	0.768
Cytarabine	KM-H2	0.594866	-0.262941	1.81279	0.768787	57.59	144.2	0.424
Cytarabine	PSN1	-0.17674	0.079458	0.837998	1.0827	29.2	144.96	1.292
Cytarabine	COLO-668	-2.54843	0.094958	0.0782042	1.09961	1306.08	103.73	14.061
Cytarabine	BFTC-909	-0.234196	0.834279	0.791207	2.30315	191.09	456.23	2.911
Cytarabine	CA46	0.482842	0.0453186	1.62067	1.04636	35.44	90.61	0.646
Cytarabine	RPMI-7951	0.22312	0.495697	1.24997	1.64164	31.33	122.17	1.313
Cytarabine	ST486	-1.17081	-0.450315	0.310117	0.637427	105.54	61.54	2.055
Cytarabine	23132-87	0.064146	-0.135512	1.06625	0.873269	18.1	311.26	0.819
Cytarabine	BFTC-905	-1.12127	-0.020098	0.325864	0.980103	200.77	98.21	3.008
Cytarabine	A3-KAW	-1.7203	-0.51071	0.179013	0.600069	235.21	70.31	3.352
Cytarabine	KYM-1	0.041765	-0.276711	1.04265	0.758274	27.27	762.54	0.727
Cytarabine	PA-TU-8988T	0.600084	0.490099	1.82227	1.63248	10.42	18.33	0.896
Cytarabine	SNU-398	0.153426	-0.0455254	1.16582	0.955495	18.04	129.67	0.82
Cytarabine	SUP-B15	-3.11842	-0.228757	0.0442268	0.795522	1698.73	92.66	17.987
Cytarabine	AMO-1	-0.027324	-0.002675	0.973046	0.997329	2.5	90.21	1.025
Cytarabine	WM793B	-1.55015	-0.135784	0.212216	0.873032	311.39	91.24	4.114
Dabrafenib	HCT-116	2.29753	0.177127	9.94958	1.19378	88	92.29	0.12
Dabrafenib	SK-MEL-5	1.92162	-2.00913	6.832	0.134106	98.04	204.55	0.02
Dabrafenib	G-361	-0.65037	1.0365	0.521853	2.81932	440.25	259.37	5.403
Dabrafenib	IPC-298	2.26456	0.4943	9.62693	1.63935	82.97	78.17	0.17
Dabrafenib	MEL-HO	-2.61838	-0.520305	0.0729206	0.594339	715.05	80.13	8.15
Dabrafenib	ST486	1.28646	0.945228	3.61994	2.5734	28.91	26.52	0.711
Dabrafenib	HDLM-2	1.81861	0.947662	6.16326	2.57967	58.14	47.89	0.419
Dabrafenib	OV-90	-0.203333	-0.382798	0.816006	0.68195	16.43	88.26	0.836
Dabrafenib	AMO-1	0.482117	0.318327	1.6195	1.37483	15.11	33.97	0.849
Dabrafenib	OCI-AML5	2.1332	1.11073	8.44187	3.03656	64.03	47.93	0.36
Dactolisib	NCI-H2052	-1.53756	-2.00251	0.214905	0.134995	37.18	30.24	0.628
Dactolisib	SK-N-DZ	-1.58467	-2.52259	0.205015	0.0802515	60.86	59.19	0.391
Dactolisib	SBC-5	-2.89134	-2.42137	0.0555018	0.0887994	59.99	16.25	1.6
Dactolisib	Calu-6	-1.81731	-1.76793	0.162462	0.170686	5.06	2.72	1.051
Dactolisib	NCI-H1792	-2.92907	-2.14459	0.0534466	0.117116	119.13	26.78	2.191
Dactolisib	HPAF-II	-1.73866	-2.21192	0.175756	0.10949	37.7	27.22	0.623
Dactolisib	SHP-77	-2.19339	-2.29231	0.111538	0.101033	9.42	4.51	0.906
Dactolisib	HCC1143	-2.69696	-2.49838	0.06741	0.0822177	21.97	7.36	1.22
Dactolisib	EC-GI-10	-1.93873	-1.93851	0.143887	0.143918	0.02	0.01	1
Dactolisib	HCT-116	-1.78945	-2.59256	0.167053	0.0748281	55.21	44.88	0.448
Dactolisib	A498	-1.5438	-2.3772	0.213567	0.0928099	56.54	53.98	0.435
Dactolisib	SK-MEL-5	-1.49374	-2.30171	0.224532	0.100087	55.42	54.09	0.446
Dactolisib	SW620	-1.48717	-2.09206	0.226012	0.123433	45.39	40.67	0.546
Dactolisib	IGROV-1	-3.09304	-2.46672	0.045364	0.0848626	87.07	20.25	1.871
Dactolisib	SF295	-2.52835	-2.10446	0.0797902	0.121912	52.79	16.77	1.528
Dactolisib	OVCAR-8	-2.25922	-2.1334	0.104432	0.118434	13.41	5.57	1.134
Dactolisib	COR-L105	-3.13604	-2.65921	0.0434543	0.0700033	61.1	15.2	1.611
Dactolisib	Daoy	-2.95447	-2.47769	0.0521063	0.0839367	61.09	16.14	1.611
Dactolisib	D-283MED	-3.59876	-2.79319	0.0273576	0.0612254	123.8	22.38	2.238
Dactolisib	Detroit562	-2.90868	-2.66045	0.0545477	0.0699165	28.18	8.53	1.282
Dactolisib	HGC-27	-4.29133	-2.43453	0.0136868	0.0876386	540.32	43.27	6.403
Dactolisib	HSC-3	-3.13508	-2.71826	0.0434961	0.0659892	51.71	13.3	1.517
Dactolisib	HuCCT1	-2.85273	-2.42	0.0576867	0.0889215	54.15	15.17	1.541
Dactolisib	IPC-298	-2.84474	-2.54199	0.0581492	0.0787098	35.36	10.64	1.354
Dactolisib	KYSE-180	-2.07014	-1.52295	0.126168	0.218067	72.84	26.43	1.728
Dactolisib	L-428	-2.7901	-2.92362	0.0614152	0.0537388	12.5	4.79	0.875
Dactolisib	MDA-MB-468	-2.32034	-2.55031	0.0982401	0.0780575	20.54	9.91	0.795
Dactolisib	MEL-HO	-2.5088	-2.49549	0.0813655	0.0824557	1.34	0.53	1.013
Dactolisib	MKN1	-1.99777	-2.36952	0.135637	0.093526	31.05	18.61	0.69
Dactolisib	NCI-N87	-1.90921	-2.8873	0.148197	0.0557266	62.4	51.23	0.376
Dactolisib	NCI-H358	-1.71218	-2.35398	0.180472	0.0949906	47.37	37.48	0.526
Dactolisib	OPM-2	-3.59312	-2.43967	0.0275124	0.0871896	216.91	32.1	3.169
Dactolisib	Raji	-2.63654	-2.57098	0.0716089	0.0764607	6.78	2.49	1.068
Dactolisib	RPMI-8402	-3.14466	-2.64186	0.0430815	0.0712286	65.33	15.99	1.653
Dactolisib	RS4-11	-2.42693	-2.85281	0.0883072	0.0576819	34.68	17.55	0.653
Dactolisib	SJSA-1	-2.1098	-2.46093	0.121262	0.0853557	29.61	16.64	0.704
Dactolisib	SW1088	-3.23543	-2.16213	0.0393431	0.115079	192.5	33.17	2.925
Dactolisib	TGBC11TKB	-1.52557	-2.59964	0.217498	0.0743003	65.84	70.4	0.342
Dactolisib	YH-13	-2.75459	-2.53841	0.063635	0.0789919	24.13	7.85	1.241
Dactolisib	KM-H2	-1.96273	-2.51106	0.140474	0.0811824	42.21	27.94	0.578
Dactolisib	BFTC-909	-3.86714	-2.11979	0.0209181	0.120057	473.94	45.18	5.739
Dactolisib	CA46	-2.0742	-2.70793	0.125657	0.0666745	46.94	30.55	0.531
Dactolisib	CAL-85-1	-1.73108	-2.70482	0.177094	0.0668826	62.23	56.25	0.378
Dactolisib	RL	-3.2507	-2.96443	0.0387471	0.0515899	33.15	8.81	1.331
Dactolisib	RPMI-7951	-3.44351	-2.22905	0.0319522	0.10763	236.85	35.27	3.368
Dactolisib	ST486	-2.41341	-2.6024	0.0895095	0.0740953	17.22	7.83	0.828
Dactolisib	23132-87	-2.65225	-2.53378	0.0704922	0.0793584	12.58	4.47	1.126
Dactolisib	A3-KAW	-3.74836	-2.3149	0.0235563	0.0987764	319.32	38.24	4.193
Dactolisib	COR-L279	-2.11838	-1.92492	0.120226	0.145887	21.34	9.13	1.213
Dactolisib	MKN45	-2.01148	-2.48744	0.13379	0.0831222	37.87	23.66	0.621
Dactolisib	PANC-10-05	-1.62606	-1.89503	0.196703	0.150314	23.58	16.54	0.764
Dactolisib	TE-11	-1.75062	-2.70408	0.173665	0.0669321	61.46	54.46	0.385
Dactolisib	KYM-1	-2.77645	-2.53399	0.0622593	0.0793416	27.44	8.73	1.274
Dactolisib	PA-TU-8988T	-2.72747	-1.77504	0.0653845	0.169476	159.2	34.92	2.592
Dactolisib	SNU-398	-1.80382	-2.3063	0.164669	0.0996291	39.5	27.86	0.605
Dactolisib	SUP-B15	-2.11756	-2.59362	0.120325	0.074749	37.88	22.48	0.621
Dactolisib	AMO-1	-3.0372	-2.51749	0.0479688	0.0806621	68.16	17.11	1.682
Dactolisib	EJM	-1.65554	-2.42622	0.190989	0.0883702	53.73	46.55	0.463
Dactolisib	WM793B	-3.17424	-2.35808	0.0418259	0.0946012	126.18	25.71	2.262
Daporinad	ChaGo-K-1	-4.64699	-4.39325	0.00959043	0.0123605	28.88	5.46	1.289
Daporinad	NCI-H1792	-3.92637	-1.68566	0.0197151	0.185322	840	57.07	9.4
Daporinad	HPAF-II	-0.157294	-2.64198	0.854453	0.0712204	91.66	1579.64	0.083
Daporinad	SHP-77	-5.42499	-3.5237	0.00440512	0.0294901	569.45	35.05	6.694
Daporinad	HCC1599	-4.56322	-3.47857	0.0104284	0.0308516	195.84	23.77	2.958
Daporinad	SK-MM-2	-4.24883	-4.63886	0.014281	0.00966872	32.3	9.18	0.677
Daporinad	HCT-116	-6.00065	-4.50575	0.00247714	0.0110453	345.89	24.91	4.459
Daporinad	K-562	-4.95568	-4.33699	0.00704329	0.0130759	85.65	12.48	1.857
Daporinad	SK-MEL-2	-3.43375	-4.55014	0.0322657	0.0105657	67.25	32.51	0.327
Daporinad	SW620	-3.86902	-3.29328	0.0208789	0.0371317	77.84	14.88	1.778
Daporinad	SF295	-3.96897	-2.23679	0.0188929	0.106801	465.3	43.64	5.653
Daporinad	COLO-680N	-3.6535	-4.68046	0.0259003	0.00927475	64.19	28.11	0.358
Daporinad	D-283MED	-7.55356	-5.59891	0.000524241	0.0037019	606.14	25.88	7.061
Daporinad	HuCCT1	-1.23797	-3.32905	0.289972	0.0358271	87.64	168.91	0.124
Daporinad	IPC-298	-3.68164	-4.74204	0.0251816	0.0087208	65.37	28.8	0.346
Daporinad	KYSE-510	-3.69399	-4.11703	0.0248726	0.0162928	34.49	11.45	0.655
Daporinad	MDA-MB-468	-4.33329	-3.4087	0.0131243	0.0330841	152.08	21.34	2.521
Daporinad	MEL-HO	-2.52556	-4.96602	0.0800132	0.00697085	91.29	96.63	0.087
Daporinad	MKN1	-3.56472	-3.82895	0.0283048	0.0217324	23.22	7.41	0.768
Daporinad	NCI-N87	-3.41558	-5.40431	0.0328574	0.00449715	86.31	58.23	0.137
Daporinad	NCI-H358	-3.27786	-2.62284	0.0377087	0.0725966	92.52	19.98	1.925
Daporinad	NCI-H28	-2.58398	-3.8765	0.0754727	0.0207232	72.54	50.02	0.275
Daporinad	OPM-2	-5.12342	-4.281	0.00595564	0.0138289	132.2	16.44	2.322
Daporinad	P31-FUJ	-6.2905	-5.33499	0.00185383	0.00481996	160	15.19	2.6
Daporinad	RPMI-8402	-7.31236	-4.69254	0.000667242	0.00916342	1273.33	35.83	13.733
Daporinad	SJSA-1	-5.88405	-5.38268	0.00278348	0.00459549	65.1	8.52	1.651
Daporinad	SW1088	-1.472	-4.18196	0.229465	0.0152686	93.35	184.1	0.067
Daporinad	T84	-3.70107	-3.35308	0.0246971	0.0349766	41.62	9.4	1.416
Daporinad	TGBC11TKB	-4.7883	-4.50693	0.00832658	0.0110323	32.49	5.88	1.325
Daporinad	THP-1	-5.98146	-5.75568	0.00252513	0.00316474	25.33	3.77	1.253
Daporinad	U-2-OS	-4.97955	-4.98753	0.00687718	0.00682247	0.8	0.16	0.992
Daporinad	YH-13	-3.46902	-3.93935	0.0311475	0.0194609	37.52	13.56	0.625
Daporinad	PSN1	-4.61484	-4.39356	0.00990377	0.0123567	24.77	4.79	1.248
Daporinad	CHP-126	-4.96172	-3.48584	0.00700088	0.0306281	337.49	29.75	4.375
Daporinad	COLO-668	-2.94962	-5.08572	0.0523597	0.00618443	88.19	72.42	0.118
Daporinad	CAL-85-1	-4.54709	-5.42204	0.010598	0.00441812	58.31	19.24	0.417
Daporinad	RL	-4.90459	-4.36873	0.0074125	0.0126673	70.89	10.93	1.709
Daporinad	ST486	-7.4822	-5.31672	0.000563015	0.00490884	771.88	28.94	8.719
Daporinad	BFTC-905	-4.93244	-4.46186	0.00720888	0.0115409	60.09	9.54	1.601
Daporinad	COR-L279	-6.45829	-4.19476	0.00156747	0.0150743	861.7	35.05	9.617
Daporinad	HDLM-2	-5.43533	-4.88877	0.00435981	0.00753066	72.73	10.06	1.727
Daporinad	MKN45	-5.06101	-4.74866	0.00633917	0.00866327	36.66	6.17	1.367
Daporinad	NCI-H810	-6.25925	-3.65453	0.00191269	0.0258736	1252.74	41.61	13.527
Daporinad	PANC-10-05	-3.4615	-3.25625	0.0313827	0.0385326	22.78	5.93	1.228
Daporinad	TE-9	-4.47474	-4.35593	0.0113932	0.0128305	12.62	2.66	1.126
Daporinad	CCK-81	-3.27609	-5.06833	0.0377758	0.00629292	83.34	54.71	0.167
Daporinad	EN	-5.93553	-5.38217	0.00264382	0.00459782	73.91	9.32	1.739
Daporinad	KYM-1	-5.45831	-4.8088	0.00426075	0.00815763	91.46	11.9	1.915
Daporinad	OV-90	-4.18605	-2.65766	0.0152063	0.0701124	361.08	36.51	4.611
Daporinad	AMO-1	-6.95543	-4.17678	0.000953442	0.0153478	1509.73	39.95	16.097
Daporinad	OCUM-1	-4.72917	-4.85283	0.0088338	0.00780622	11.63	2.61	0.884
Dasatinib	NCI-H1650	0.4036	-1.17861	1.4972	0.307707	79.45	392.02	0.206
Dasatinib	NCI-H2052	0.338108	-1.04717	1.40229	0.350928	74.97	409.72	0.25
Dasatinib	NCI-H1792	0.111032	0.386264	1.11743	1.47147	31.68	247.89	1.317
Dasatinib	TE-1	-1.02905	-0.424384	0.357347	0.654172	83.06	58.76	1.831
Dasatinib	K-562	-5.70219	-0.928425	0.00333863	0.395176	11736.5	83.72	118.365
Dasatinib	A498	0.663619	-0.304083	1.94181	0.7378	62	145.82	0.38
Dasatinib	IGROV-1	-3.34756	-0.315597	0.03517	0.729353	1973.8	90.57	20.738
Dasatinib	OVCAR-8	0.582473	-0.0366456	1.79046	0.964018	46.16	106.29	0.538
Dasatinib	COR-L105	0.653142	-0.870093	1.92157	0.418913	78.2	233.22	0.218
Dasatinib	Detroit562	-2.3059	-0.472333	0.099669	0.623546	525.62	79.52	6.256
Dasatinib	GCT	-0.534348	-0.65376	0.586051	0.520087	11.26	22.35	0.887
Dasatinib	HGC-27	-1.36855	-0.280335	0.254476	0.755531	196.9	79.52	2.969
Dasatinib	HSC-3	-0.757893	-1.33503	0.468653	0.26315	43.85	76.15	0.562
Dasatinib	HuCCT1	-0.208593	-0.467314	0.811726	0.626684	22.8	124.03	0.772
Dasatinib	KYSE-180	-0.245181	0.350047	0.782563	1.41913	81.34	242.77	1.813
Dasatinib	MKN1	0.027163	0.155319	1.02754	1.16803	13.67	471.8	1.137
Dasatinib	NCI-H28	-0.45968	-0.86289	0.631486	0.421941	33.18	87.72	0.668
Dasatinib	SW1088	-1.86416	-0.372562	0.155026	0.688967	344.42	80.01	4.444
Dasatinib	YH-13	-0.787238	-0.468761	0.4551	0.625777	37.5	40.45	1.375
Dasatinib	RCC10RGB	-0.0799572	-0.310441	0.923156	0.733124	20.59	288.26	0.794
Dasatinib	PSN1	0.0930106	-0.0730144	1.09747	0.929587	15.3	178.5	0.847
Dasatinib	CA46	0.503402	0.000684	1.65434	1.00068	39.51	99.86	0.605
Dasatinib	A204	0.31353	-2.44384	1.36825	0.0868266	93.65	879.46	0.063
Dasatinib	RPMI-7951	-1.55269	-0.812966	0.211678	0.443541	109.54	47.64	2.095
Dasatinib	ST486	0.335028	-1.64329	1.39798	0.193342	86.17	590.49	0.138
Dasatinib	BFTC-905	-0.377171	-0.0774634	0.685799	0.925461	34.95	79.46	1.349
Dasatinib	PANC-10-05	0.080678	-0.313473	1.08402	0.730904	32.57	488.55	0.674
Dasatinib	TE-11	-0.853932	-1.73773	0.425738	0.17592	58.68	103.5	0.413
Dasatinib	PA-TU-8988T	0.0607	-0.03021	1.06258	0.970242	8.69	149.77	0.913
Dasatinib	SUP-B15	-4.01619	-4.58455	0.0180214	0.0102083	43.35	14.15	0.566
Dihydrorotenone	NCI-H1092	-0.173727	-2.35398	0.840526	0.0949901	88.7	1254.99	0.113
Dihydrorotenone	SBC-5	-0.163728	-1.02098	0.848973	0.360243	57.57	523.58	0.424
Dihydrorotenone	SHP-77	-1.37087	-1.14406	0.253885	0.318523	25.46	16.55	1.255
Dihydrorotenone	HCC1954	-4.52232	-1.15176	0.0108638	0.316079	2809.47	74.53	29.095
Dihydrorotenone	J82	-0.042963	-1.22793	0.957947	0.292897	69.42	2758.12	0.306
Dihydrorotenone	SK-MM-2	-2.98233	-2.46961	0.0506744	0.0846181	66.98	17.19	1.67
Dihydrorotenone	TE-1	-0.524248	-1.62603	0.592	0.196708	66.77	210.17	0.332
Dihydrorotenone	HL-60	-3.98092	-0.442996	0.0186684	0.64211	3339.56	88.87	34.396
Dihydrorotenone	K-562	-2.08574	-1.62729	0.124216	0.196461	58.16	21.98	1.582
Dihydrorotenone	SK-MEL-5	-0.805492	-1.16127	0.446868	0.313087	29.94	44.17	0.701
Dihydrorotenone	SW620	-0.707699	-2.19124	0.492777	0.111778	77.32	209.63	0.227
Dihydrorotenone	OVCAR-4	-0.555188	-1.4324	0.573964	0.238736	58.41	158	0.416
Dihydrorotenone	G-361	-0.305387	-1.28919	0.736838	0.275493	62.61	322.15	0.374
Dihydrorotenone	HuH-7	-3.88844	-1.63349	0.0204772	0.195247	853.48	57.99	9.535
Dihydrorotenone	MDA-MB-468	-2.69213	-1.46085	0.0677368	0.232038	242.56	45.74	3.426
Dihydrorotenone	MFE-296	-3.91584	-1.28672	0.0199237	0.276174	1286.15	67.14	13.862
Dihydrorotenone	RS4-11	-0.787268	-1.36928	0.455086	0.254289	44.12	73.93	0.559
Dihydrorotenone	ZR-75-30	-0.617324	-1.87432	0.539386	0.153459	71.55	203.62	0.285
Dihydrorotenone	KM-H2	-0.11873	-1.98983	0.888048	0.136719	84.6	1575.93	0.154
Dihydrorotenone	COLO-668	-1.07711	-1.8217	0.340579	0.16175	52.51	69.13	0.475
Dihydrorotenone	NCI-H810	-1.69422	-1.31714	0.183743	0.267901	45.8	22.26	1.458
Dihydrorotenone	CCK-81	-2.06831	-1.2602	0.1264	0.283598	124.37	39.07	2.244
Dihydrorotenone	OV-90	-1.79559	-1.13153	0.16603	0.322538	94.26	36.98	1.943
Dihydrorotenone	PA-TU-8988T	-1.03067	-1.13847	0.356769	0.320309	10.22	10.46	0.898
Dihydrorotenone	SNU-398	-0.739016	-1.22797	0.477584	0.292888	38.67	66.16	0.613
Dihydrorotenone	SUP-B15	-0.15169	-1.62257	0.859255	0.19739	77.03	969.66	0.23
Dihydrorotenone	EJM	-0.76787	-1.34933	0.464	0.259413	44.09	75.72	0.559
Dihydrorotenone	OV-56	-0.103609	-1.15707	0.901578	0.314407	65.13	1016.76	0.349
Dinaciclib	ChaGo-K-1	-3.18691	-3.31245	0.0412993	0.0364269	11.8	3.94	0.882
Dinaciclib	NCI-H1650	-0.184581	-3.41044	0.831452	0.0330267	96.03	1747.66	0.04
Dinaciclib	NCI-H1092	-1.04938	-3.21333	0.350156	0.0402226	88.51	206.21	0.115
Dinaciclib	SK-N-DZ	-2.41049	-3.63951	0.0897716	0.0262651	70.74	50.99	0.293
Dinaciclib	SBC-5	-3.75286	-2.85607	0.0234506	0.0574943	145.17	23.9	2.452
Dinaciclib	Calu-6	-1.47554	-2.52035	0.228656	0.0804311	64.82	70.81	0.352
Dinaciclib	NCI-H1792	-3.65506	-2.02304	0.0258599	0.132253	411.42	44.65	5.114
Dinaciclib	HPAF-II	-1.70411	-2.38536	0.181934	0.0920562	49.4	39.98	0.506
Dinaciclib	SHP-77	-3.47018	-2.64734	0.0311115	0.0708395	127.7	23.71	2.277
Dinaciclib	HCC1954	-4.38149	-2.11832	0.0125067	0.120233	861.35	51.65	9.614
Dinaciclib	HCC1143	-2.47971	-2.7196	0.0837671	0.0659012	21.33	9.67	0.787
Dinaciclib	HCC1599	-1.59928	-2.98858	0.202042	0.0503591	75.07	86.87	0.249
Dinaciclib	EC-GI-10	-4.00701	-2.73918	0.0181877	0.0646234	255.31	31.64	3.553
Dinaciclib	SK-MM-2	-3.33398	-3.81779	0.035651	0.0219763	38.36	14.51	0.616
Dinaciclib	TE-1	-1.66699	-2.65168	0.188814	0.0705324	62.64	59.07	0.374
Dinaciclib	HCT-116	-3.13066	-3.09269	0.0436887	0.0453795	3.87	1.21	1.039
Dinaciclib	HL-60	-3.86325	-2.52239	0.0209996	0.0802675	282.23	34.71	3.822
Dinaciclib	K-562	-2.30278	-3.48018	0.0999804	0.0308018	69.19	51.13	0.308
Dinaciclib	A498	-1.89637	-3.08605	0.150112	0.0456821	69.57	62.73	0.304
Dinaciclib	SK-MEL-2	-2.33243	-2.79572	0.09706	0.0610707	37.08	19.86	0.629
Dinaciclib	SK-MEL-5	-2.50025	-3.22993	0.0820646	0.0395601	51.79	29.18	0.482
Dinaciclib	SW620	-3.5587	-2.27684	0.0284757	0.102607	260.33	36.02	3.603
Dinaciclib	IGROV-1	-2.8891	-2.90074	0.055626	0.0549825	1.16	0.4	0.988
Dinaciclib	SF295	-3.04081	-2.20436	0.0477961	0.110321	130.82	27.51	2.308
Dinaciclib	OVCAR-4	-0.358353	-2.71066	0.698826	0.0664932	90.49	656.42	0.095
Dinaciclib	OVCAR-8	-2.69871	-2.6077	0.0672923	0.073704	9.53	3.37	1.095
Dinaciclib	647-V	-2.35726	-1.26133	0.0946791	0.283277	199.2	46.49	2.992
Dinaciclib	COR-L105	-2.16625	-3.04274	0.114606	0.047704	58.38	40.46	0.416
Dinaciclib	COLO-680N	-0.784481	-3.0227	0.456356	0.0486699	89.34	285.31	0.107
Dinaciclib	Daoy	-3.63248	-2.83813	0.0264506	0.0585353	121.3	21.87	2.213
Dinaciclib	D-283MED	-4.09934	-3.5037	0.0165836	0.0300857	81.42	14.53	1.814
Dinaciclib	Detroit562	-3.54553	-2.62193	0.0288532	0.0726622	151.83	26.05	2.518
Dinaciclib	G-361	-3.07557	-2.99588	0.0461632	0.0499926	8.3	2.59	1.083
Dinaciclib	GCT	-0.814679	-2.77568	0.442781	0.062307	85.93	240.71	0.141
Dinaciclib	HGC-27	-3.59155	-2.6097	0.0275556	0.073557	166.94	27.34	2.669
Dinaciclib	HSC-3	-3.65705	-2.45318	0.0258084	0.0860199	233.3	32.92	3.333
Dinaciclib	HuCCT1	-1.85792	-2.75409	0.155996	0.0636667	59.19	48.24	0.408
Dinaciclib	IPC-298	-4.22107	-2.85376	0.014683	0.0576272	292.48	32.39	3.925
Dinaciclib	KG-1	-3.35899	-3.26574	0.0347703	0.0381686	9.77	2.78	1.098
Dinaciclib	KYSE-180	-3.75236	-2.41659	0.0234622	0.089225	280.29	35.6	3.803
Dinaciclib	KYSE-510	-3.39086	-3.07221	0.0336798	0.0463186	37.53	9.4	1.375
Dinaciclib	L-428	-2.85089	-3.54536	0.0577929	0.0288581	50.07	24.36	0.499
Dinaciclib	MDA-MB-468	-4.29783	-2.76991	0.013598	0.0626674	360.86	35.55	4.609
Dinaciclib	MEL-HO	-3.51013	-3.11581	0.0298929	0.0443424	48.34	11.23	1.483
Dinaciclib	MFE-296	-0.366712	-3.10134	0.693009	0.044989	93.51	745.71	0.065
Dinaciclib	MKN1	-2.22128	-2.87197	0.10847	0.0565876	47.83	29.29	0.522
Dinaciclib	NCI-H716	-2.00443	-3.32495	0.134737	0.0359742	73.3	65.88	0.267
Dinaciclib	NCI-N87	-3.06426	-3.1429	0.0466884	0.0431576	7.56	2.57	0.924
Dinaciclib	NCI-H358	-2.37878	-3.08976	0.0926634	0.0455127	50.88	29.89	0.491
Dinaciclib	NCI-H28	-0.789157	-2.76982	0.454227	0.0626731	86.2	250.98	0.138
Dinaciclib	OPM-2	-3.76789	-2.66207	0.0231008	0.0698039	202.17	29.35	3.022
Dinaciclib	Raji	-3.68841	-3.40506	0.0250119	0.0332048	32.76	7.68	1.328
Dinaciclib	RS4-11	-3.97133	-3.54709	0.0188484	0.0288082	52.84	10.68	1.528
Dinaciclib	SW1088	-1.65141	-2.74364	0.19178	0.0643359	66.45	66.14	0.335
Dinaciclib	SW48	-2.01358	-3.08766	0.13351	0.0456086	65.84	53.34	0.342
Dinaciclib	T84	-2.17536	-1.42359	0.113567	0.240848	112.08	34.56	2.121
Dinaciclib	THP-1	-3.79781	-3.70587	0.0224198	0.0245788	9.63	2.42	1.096
Dinaciclib	U-2-OS	-3.45095	-3.02601	0.0317154	0.0485089	52.95	12.31	1.53
Dinaciclib	YH-13	-2.88747	-2.48245	0.0557168	0.083538	49.93	14.03	1.499
Dinaciclib	RCC10RGB	-1.10912	-2.69615	0.32985	0.0674649	79.55	143.09	0.205
Dinaciclib	KM-H2	-3.08186	-3.52597	0.0458739	0.0294231	35.86	14.41	0.641
Dinaciclib	PSN1	-2.09527	-2.89627	0.123038	0.0552291	55.11	38.23	0.449
Dinaciclib	COLO-668	-1.11085	-2.83491	0.329278	0.0587237	82.17	155.2	0.178
Dinaciclib	BFTC-909	-2.0968	-2.09073	0.122849	0.123597	0.61	0.29	1.006
Dinaciclib	CA46	-3.23384	-2.83039	0.039406	0.0589896	49.7	12.48	1.497
Dinaciclib	A204	-0.573813	-2.99124	0.563373	0.0502252	91.08	421.29	0.089
Dinaciclib	CAL-85-1	-3.16239	-2.99712	0.0423245	0.0499304	17.97	5.23	1.18
Dinaciclib	RL	-3.96889	-3.94673	0.0188944	0.0193177	2.24	0.56	1.022
Dinaciclib	RPMI-7951	-3.88808	-2.47363	0.0204846	0.0842781	311.42	36.38	4.114
Dinaciclib	ST486	-4.35055	-3.3243	0.0128998	0.0359976	179.06	23.59	2.791
Dinaciclib	23132-87	-3.01805	-2.98456	0.0488964	0.0505619	3.41	1.11	1.034
Dinaciclib	BFTC-905	-3.40925	-3.47706	0.033066	0.030898	6.56	1.99	0.934
Dinaciclib	A3-KAW	-3.77248	-3.33597	0.0229949	0.0355801	54.73	11.57	1.547
Dinaciclib	HDLM-2	-3.57168	-3.11379	0.0281086	0.0444322	58.07	12.82	1.581
Dinaciclib	MKN45	-3.43117	-3.19712	0.0323492	0.0408797	26.37	6.82	1.264
Dinaciclib	NCI-H810	-3.60557	-3.02535	0.0271718	0.0485407	78.64	16.09	1.786
Dinaciclib	PANC-10-05	-1.18368	-2.89158	0.30615	0.0554885	81.88	144.29	0.181
Dinaciclib	TE-9	-3.05269	-2.69716	0.0472318	0.0673966	42.69	11.65	1.427
Dinaciclib	TE-11	-3.92196	-3.27075	0.0198022	0.0379781	91.79	16.6	1.918
Dinaciclib	LCLC-97TM1	-3.04148	-1.96609	0.0477642	0.140002	193.11	35.36	2.931
Dinaciclib	CCK-81	-3.5582	-3.04138	0.02849	0.0477691	67.67	14.52	1.677
Dinaciclib	EN	-3.30774	-3.24797	0.0365988	0.038853	6.16	1.81	1.062
Dinaciclib	KYM-1	-3.50429	-3.10641	0.030068	0.0447615	48.87	11.35	1.489
Dinaciclib	OV-90	-0.08735	-1.4258	0.916356	0.240317	73.77	1532.28	0.262
Dinaciclib	PA-TU-8988T	-3.39204	-1.66149	0.03364	0.189855	464.37	51.02	5.644
Dinaciclib	SNU-398	-4.49151	-2.72197	0.0112037	0.065745	486.82	39.4	5.868
Dinaciclib	SUP-B15	-4.64302	-3.80178	0.0096286	0.0223309	131.92	18.12	2.319
Dinaciclib	AMO-1	-4.42807	-3.12833	0.0119375	0.0437909	266.83	29.35	3.668
Dinaciclib	EJM	-2.92868	-3.35651	0.0534678	0.0348568	34.81	14.61	0.652
Dinaciclib	huH-1	-2.15774	-3.07182	0.115585	0.0463367	59.91	42.36	0.401
Dinaciclib	NCI-H1568	-3.8409	-2.95872	0.0214742	0.0518852	141.62	22.97	2.416
Dinaciclib	NUGC-4	-0.233957	-2.81435	0.791396	0.0599439	92.43	1102.93	0.076
Dinaciclib	OCUM-1	-2.42721	-2.65355	0.0882826	0.0704008	20.26	9.33	0.797
Dinaciclib	WM793B	-2.39058	-3.0266	0.0915767	0.0484803	47.06	26.61	0.529
Dinaciclib	OCI-AML5	-4.04094	-3.96103	0.0175809	0.0190436	8.32	1.98	1.083
Dinaciclib	OV-56	-1.19737	-2.42758	0.301987	0.0882503	70.78	102.74	0.292
Dinaciclib	SNU-C5	-2.87194	-3.13205	0.056589	0.0436281	22.9	9.06	0.771
Elephantin	SK-N-DZ	2.22268	3.4586	9.23199	31.7724	244.16	55.61	3.442
Elephantin	SBC-5	1.84412	3.14646	6.32255	23.2537	267.79	70.62	3.678
Elephantin	SK-MM-2	2.88029	3.30473	17.8194	27.2412	52.87	14.74	1.529
Elephantin	HL-60	2.44179	3.21105	11.4935	24.805	115.82	31.5	2.158
Elephantin	K-562	2.77492	3.80844	16.0373	45.0799	181.09	37.24	2.811
Elephantin	SW620	2.6505	3.43009	14.1611	30.8796	118.06	29.41	2.181
Elephantin	OVCAR-8	2.41306	3.26064	11.1681	26.0662	133.4	35.12	2.334
Elephantin	647-V	2.71861	3.01934	15.1593	20.4778	35.08	11.06	1.351
Elephantin	Daoy	2.54629	2.82696	12.7597	16.8939	32.4	11.02	1.324
Elephantin	D-283MED	1.18271	3.74963	3.2632	42.5052	1202.56	217.04	13.026
Elephantin	HSC-3	1.9759	3.37094	7.21308	29.1058	303.51	70.6	4.035
Elephantin	MDA-MB-468	1.77804	3.69308	5.91823	40.1685	578.73	107.71	6.787
Elephantin	OPM-2	1.80665	3.64035	6.09004	38.1054	525.7	101.5	6.257
Elephantin	RS4-11	2.0695	3.63894	7.92087	38.0515	380.4	75.84	4.804
Elephantin	PSN1	2.92138	3.21529	18.5669	24.9104	34.17	10.06	1.342
Elephantin	CA46	2.43769	3.36844	11.4466	29.0331	153.64	38.18	2.536
Elephantin	RPMI-7951	1.74958	3.7898	5.75218	44.2474	669.23	116.61	7.692
Elephantin	ST486	0.986899	3.53634	2.6829	34.341	1180	258.33	12.8
Elephantin	BFTC-905	1.87299	3.68832	6.50774	39.9775	514.31	96.92	6.143
Elephantin	A3-KAW	1.13646	3.42991	3.11573	30.8739	890.9	201.81	9.909
Elephantin	NCI-H810	2.68629	3.46794	14.6771	32.0705	118.51	29.1	2.185
Elephantin	KYM-1	2.15482	3.09015	8.62637	21.9803	154.8	43.41	2.548
Elephantin	SUP-B15	2.19582	3.53688	8.98733	34.3594	282.31	61.07	3.823
Elephantin	AMO-1	1.57192	3.3723	4.81591	29.1455	505.19	114.53	6.052
Elephantin	WM793B	2.97235	3.33188	19.5378	27.9909	43.27	12.1	1.433
Elephantin	SNU-C5	2.49892	3.37298	12.1694	29.1654	139.66	34.98	2.397
Elesclomol	HCC1599	-2.15134	-2.55553	0.116328	0.0776509	33.25	18.79	0.668
Elesclomol	SW620	-1.89367	-2.75579	0.150519	0.0635588	57.77	45.53	0.422
Elesclomol	SF295	-1.97096	-2.62529	0.139323	0.0724191	48.02	33.2	0.52
Elesclomol	IPC-298	-2.75301	-2.8855	0.0637355	0.055827	12.41	4.81	0.876
Elesclomol	CHP-126	-1.96108	-3.11116	0.140707	0.0445492	68.34	58.65	0.317
Elesclomol	RL	-3.01566	-2.9695	0.0490136	0.0513289	4.72	1.53	1.047
Elesclomol	TE-11	-2.79688	-3.29214	0.0610004	0.0371741	39.06	17.71	0.609
Entinostat	NCI-H1092	1.4945	1.03807	4.4571	2.82375	36.65	30.54	0.634
Entinostat	SK-N-DZ	0.363406	0.671023	1.43822	1.95624	36.02	84.65	1.36
Entinostat	NCI-H1792	1.39848	1.65802	4.04905	5.24891	29.63	18.56	1.296
Entinostat	SHP-77	1.18997	1.2543	3.28699	3.50538	6.64	5.41	1.066
Entinostat	HCC1954	1.99413	1.28704	7.34584	3.62205	50.69	35.46	0.493
Entinostat	HCC1143	1.59019	1.13309	4.9047	3.10522	36.69	28.75	0.633
Entinostat	HCC1599	-0.329985	1.3336	0.718935	3.79469	427.82	504.14	5.278
Entinostat	EC-GI-10	1.55318	1.00125	4.72647	2.72167	42.42	35.54	0.576
Entinostat	SK-MM-2	0.573948	1.25621	1.77526	3.5121	97.84	118.87	1.978
Entinostat	TE-1	1.7735	1.42013	5.89144	4.13767	29.77	19.92	0.702
Entinostat	HCT-116	1.2433	1.06136	3.46704	2.8903	16.63	14.63	0.834
Entinostat	HL-60	0.657198	1.7366	1.92938	5.67799	194.29	164.24	2.943
Entinostat	SK-MEL-2	1.65547	1.25421	5.23553	3.50506	33.05	24.24	0.669
Entinostat	SK-MEL-5	0.93189	1.31456	2.5393	3.72313	46.62	41.06	1.466
Entinostat	SW620	2.09112	1.48512	8.09394	4.41551	45.45	28.98	0.546
Entinostat	IGROV-1	1.50821	1.14917	4.51862	3.15557	30.17	23.81	0.698
Entinostat	SF295	1.90188	1.39122	6.69847	4.01976	39.99	26.85	0.6
Entinostat	OVCAR-8	1.01998	1.13098	2.77315	3.09869	11.74	10.88	1.117
Entinostat	Daoy	1.09262	1.33375	2.98208	3.79523	27.27	22.07	1.273
Entinostat	D-283MED	1.68733	0.957633	5.40506	2.60552	51.79	43.25	0.482
Entinostat	Detroit562	1.6236	1.35534	5.07133	3.87806	23.53	16.52	0.765
Entinostat	G-361	0.04354	1.22375	1.0445	3.39993	225.51	2710.64	3.255
Entinostat	GCT	2.12885	1.64174	8.40523	5.16414	38.56	22.88	0.614
Entinostat	IPC-298	0.180164	0.9694	1.19741	2.63636	120.17	438.07	2.202
Entinostat	KG-1	1.17198	0.85648	3.22837	2.35486	27.06	26.92	0.729
Entinostat	KYSE-510	1.37141	1.20055	3.94091	3.32193	15.71	12.46	0.843
Entinostat	L-428	1.00128	0.734681	2.72177	2.08482	23.4	26.63	0.766
Entinostat	MDA-MB-468	2.14465	0.931431	8.53907	2.53814	70.28	56.57	0.297
Entinostat	MEL-HO	0.283719	0.802156	1.32806	2.23034	67.94	182.73	1.679
Entinostat	NCI-H716	1.55665	1.40326	4.74292	4.06846	14.22	9.85	0.858
Entinostat	OPM-2	0.525158	1.05265	1.69073	2.86523	69.47	100.44	1.695
Entinostat	Raji	1.52868	0.894945	4.6121	2.4472	46.94	41.46	0.531
Entinostat	RS4-11	2.10115	0.723121	8.17553	2.06086	74.79	65.58	0.252
Entinostat	THP-1	1.27495	0.670264	3.57852	1.95475	45.38	47.43	0.546
Entinostat	U-2-OS	1.30813	1.38133	3.69927	3.98021	7.59	5.6	1.076
Entinostat	KM-H2	1.91615	0.886353	6.79475	2.42627	64.29	53.74	0.357
Entinostat	CHP-126	-0.755083	1.17213	0.469972	3.22885	587.03	255.23	6.87
Entinostat	COLO-668	1.95501	1.27279	7.06399	3.57079	49.45	34.9	0.505
Entinostat	CA46	0.897021	0.973829	2.45229	2.64806	7.98	8.56	1.08
Entinostat	CAL-85-1	2.02614	1.01235	7.58474	2.75206	63.72	50.04	0.363
Entinostat	RL	-0.302959	0.744941	0.738629	2.10632	185.17	345.89	2.852
Entinostat	RPMI-7951	1.6545	1.37673	5.23046	3.96193	24.25	16.79	0.757
Entinostat	ST486	0.134355	0.746816	1.1438	2.11027	84.5	455.85	1.845
Entinostat	23132-87	2.20564	0.967364	9.07608	2.631	71.01	56.14	0.29
Entinostat	A3-KAW	-0.597936	0.891302	0.549946	2.4383	343.37	249.06	4.434
Entinostat	HDLM-2	2.19077	1.3186	8.9421	3.73818	58.2	39.81	0.418
Entinostat	NCI-H810	1.33037	0.879035	3.78245	2.40857	36.32	33.93	0.637
Entinostat	LCLC-97TM1	1.59748	1.65074	4.94058	5.21086	5.47	3.33	1.055
Entinostat	CCK-81	1.02913	1.07028	2.79862	2.91621	4.2	4	1.042
Entinostat	KYM-1	1.97341	1.26884	7.19518	3.55673	50.57	35.7	0.494
Entinostat	SUP-B15	1.44994	0.963956	4.26286	2.62205	38.49	33.52	0.615
Entinostat	AMO-1	0.333693	0.88076	1.39611	2.41273	72.82	163.94	1.728
Entinostat	EJM	0.610131	0.982864	1.84067	2.6721	45.17	61.09	1.452
Entinostat	NUGC-4	1.15946	1.48767	3.18822	4.42675	38.85	28.31	1.388
Entinostat	WM793B	2.16285	1.06737	8.69592	2.90773	66.56	50.65	0.334
Entinostat	OCI-AML5	0.818883	0.923505	2.26797	2.5181	11.03	12.78	1.11
Entinostat	SNU-C5	1.81409	1.07537	6.13547	2.93109	52.23	40.72	0.478
Entospletinib	IGROV-1	2.28339	1.65828	9.80984	5.25027	46.48	27.38	0.535
Entospletinib	RL	1.29983	1.41479	3.66867	4.11562	12.18	8.84	1.122
Entospletinib	ST486	2.12461	1.41991	8.36967	4.13675	50.57	33.17	0.494
Entospletinib	A3-KAW	1.73548	1.56742	5.67168	4.79424	15.47	9.68	0.845
Entospletinib	TE-11	2.27092	1.38399	9.68827	3.9908	58.81	39.06	0.412
Entospletinib	SNU-398	1.31851	1.49378	3.73786	4.45389	19.16	13.29	1.192
Entospletinib	AMO-1	1.7631	1.48168	5.83046	4.40034	24.53	15.96	0.755
Entospletinib	huH-1	2.19659	1.44877	8.9943	4.25789	52.66	34.04	0.473
Epirubicin	ChaGo-K-1	-0.478148	-0.335091	0.61993	0.715273	15.38	29.92	1.154
Epirubicin	NCI-H1650	-0.754336	-0.510134	0.470323	0.600415	27.66	32.37	1.277
Epirubicin	NCI-H1092	1.67999	-0.735335	5.36549	0.479345	91.07	143.77	0.089
[truncated: 3,544 more rows]

## Sheet: DeepCDR_NCD1
DeepCDR_NCD1: Unknown Drugs/Compounds split 1 prediction results
drug/compound	cell_line	Ln(IC50_expt)	Ln(IC50_pred)	IC50_expt (uM)	IC50_pred (uM)	% error IC50	% error LnIC50	Difference factor (for EVAPA)
150412	NCI-H2122	0.980843	1.47812	2.6667	4.38471	64.42	50.7	1.644
150412	CAL-33	0.0621772	1.69784	1.06415	5.46211	413.28	2630.64	5.133
150412	AGS	0.861639	1.37522	2.36704	3.95595	67.13	59.61	1.671
150412	LAMA-84	0.699902	0.892186	2.01356	2.44046	21.2	27.47	1.212
150412	MDA-MB-415	0.840615	1.02426	2.31779	2.78504	20.16	21.85	1.202
150412	RL95-2	-0.282307	1.1514	0.754042	3.1626	319.42	507.85	4.194
150412	TE-6	-1.80213	1.29957	0.164948	3.66771	2123.56	172.11	22.236
150412	Hep3B2-1-7	0.109684	1.00589	1.11593	2.73435	145.03	817.08	2.45
150412	ALL-SIL	0.402904	1.56136	1.49616	4.76531	218.5	287.53	3.185
150412	NCI-H1781	0.309918	1.9998	1.36331	7.38758	441.88	545.27	5.419
150412	MOLM-13	0.364842	1.31223	1.44029	3.71444	157.9	259.67	2.579
630600	A673	-0.44554	1.5221	0.640478	4.58185	615.38	441.63	7.154
630600	8-MG-BA	0.185871	1.66877	1.20427	5.30565	340.57	797.81	4.406
630600	NCI-H82	0.562098	1.60828	1.75435	4.99419	184.68	186.12	2.847
630600	SK-N-DZ	0.224427	1.55715	1.25161	4.74528	279.14	593.83	3.791
630600	NCI-H929	-0.908307	1.55176	0.403206	4.71978	1070.56	270.84	11.706
630600	Calu-6	0.625167	2.04876	1.86856	7.75829	315.2	227.71	4.152
630600	SHP-77	0.788226	1.78078	2.19949	5.93447	169.81	125.92	2.698
630600	EC-GI-10	0.334535	1.40461	1.39729	4.07393	191.56	319.87	2.916
630600	HSC-2	-0.709145	1.92893	0.492065	6.88211	1298.62	372.01	13.986
630600	KYSE-140	0.131527	1.42323	1.14057	4.1505	263.9	982.08	3.639
630600	TE-15	0.301134	1.4549	1.35139	4.28406	217.01	383.14	3.17
630600	HCT-116	-0.029982	2.10725	0.970463	8.22561	747.6	7128.39	8.476
630600	HCT-15	0.495123	2.08724	1.6407	8.06265	391.42	321.56	4.914
630600	Hs-578-T	-0.170806	1.44658	0.842985	4.24854	403.99	946.91	5.04
630600	MDA-MB-231	0.696528	1.99188	2.00677	7.32927	265.23	185.97	3.652
630600	SW620	0.318064	1.89569	1.37446	6.65711	384.34	496.01	4.843
630600	RPMI-8226	-1.46578	1.63581	0.230897	5.1336	2123.33	211.6	22.233
630600	LOXIMVI	0.37345	1.90713	1.45274	6.73375	363.52	410.68	4.635
630600	KM12	-0.188029	1.0971	0.828591	2.99548	261.51	683.48	3.615
630600	Becker	0.288049	1.53363	1.33382	4.63498	247.5	432.42	3.475
630600	AGS	0.519222	2.00433	1.68072	7.42115	341.55	286.03	4.415
630600	A375	-0.198487	1.87618	0.81997	6.52849	696.19	1045.24	7.962
630600	639-V	0.64622	2.24844	1.90831	9.47296	396.4	247.94	4.964
630600	697	0.480866	1.85995	1.61747	6.4234	297.13	286.79	3.971
630600	A2780	1.0921	2.08403	2.98054	8.03682	169.64	90.83	2.696
630600	CAL-120	0.507997	1.86799	1.66196	6.47529	289.62	267.72	3.896
630600	CAL-62	1.05567	1.99201	2.8739	7.33026	155.06	88.7	2.551
630600	Daudi	-0.216054	1.78538	0.805692	5.96182	639.96	926.36	7.4
630600	DB	0.927482	1.44052	2.52814	4.22289	67.04	55.32	1.67
630600	Daoy	0.84143	1.97884	2.31968	7.23432	211.87	135.18	3.119
630600	D-283MED	1.026	1.34788	2.78987	3.84925	37.97	31.37	1.38
630600	DOHH-2	-0.493635	1.13062	0.610404	3.09757	407.46	329.04	5.075
630600	FADU	0.378986	1.60071	1.4608	4.95653	239.3	322.37	3.393
630600	GI-1	0.146835	1.83394	1.15816	6.25852	440.38	1148.98	5.404
630600	ESS-1	-0.215197	1.78475	0.806382	5.95807	638.86	929.35	7.389
630600	HCC1569	-0.614032	1.72584	0.541164	5.61724	937.99	381.07	10.38
630600	HOS	0.228986	1.70456	1.25732	5.49895	337.35	644.39	4.374
630600	HSC-3	0.210781	1.7001	1.23464	5.47449	343.41	706.57	4.434
630600	JVM-3	-0.923468	1.23822	0.397139	3.44947	768.58	234.08	8.686
630600	KALS-1	0.798925	2.27006	2.22315	9.67998	335.42	184.14	4.354
630600	KU812	0.43974	1.64087	1.5523	5.15967	232.39	273.15	3.324
630600	KU-19-19	0.75633	1.86212	2.13044	6.4374	202.16	146.21	3.022
630600	L-428	0.715417	1.88878	2.04504	6.61128	223.28	164.01	3.233
630600	L-540	0.378372	1.12329	1.45991	3.07497	110.63	196.88	2.106
630600	LAMA-84	-0.150998	2.60106	0.859849	13.478	1467.49	1822.58	15.675
630600	LOUCY	-0.299291	1.77776	0.741344	5.91661	698.09	693.99	7.981
630600	LP-1	1.04456	2.40864	2.84215	11.1188	291.21	130.59	3.912
630600	LS-411N	0.452106	1.65283	1.57162	5.22172	232.25	265.58	3.323
630600	LS-513	0.799268	2.13209	2.22391	8.43246	279.17	166.76	3.792
630600	MDA-MB-468	0.558971	1.94141	1.74887	6.96859	298.46	247.32	3.985
630600	MEG-01	0.339187	1.93944	1.40381	6.95486	395.43	471.79	4.954
630600	MES-SA	0.804764	1.57686	2.23617	4.83974	116.43	95.94	2.164
630600	MOLT-16	-0.429082	1.7048	0.651107	5.50031	744.76	497.31	8.448
630600	NALM-6	-0.106602	1.31944	0.898883	3.74134	316.22	1337.73	4.162
630600	NAMALWA	-0.974934	1.33046	0.377217	3.78277	902.81	236.47	10.028
630600	NOMO-1	0.651396	1.95179	1.91822	7.04128	267.07	199.63	3.671
630600	NCI-H524	1.06076	1.26163	2.88855	3.53118	22.25	18.94	1.222
630600	OPM-2	-0.724803	1.69601	0.48442	5.45214	1025.5	334	11.255
630600	P12-ICHIKAWA	-0.101523	1.16773	0.903461	3.21467	255.82	1250.21	3.558
630600	PF-382	0.451	1.83674	1.56988	6.27601	299.78	307.26	3.998
630600	Raji	0.160295	1.57423	1.17386	4.827	311.21	882.08	4.112
630600	RKO	0.370748	1.37272	1.44882	3.94609	172.37	270.26	2.724
630600	RS4-11	0.822198	1.50418	2.2755	4.50044	97.78	82.95	1.978
630600	RT-112	0.657364	1.55502	1.9297	4.73519	145.38	136.55	2.454
630600	SK-HEP-1	0.844746	2.41493	2.32739	11.189	380.75	185.88	4.808
630600	SKM-1	0.7422	1.96736	2.10055	7.15174	240.47	165.07	3.405
630600	WM-115	1.00772	2.02313	2.73935	7.56193	176.05	100.76	2.76
630600	CA46	-0.156393	1.81676	0.855223	6.15191	619.33	1261.66	7.193
630600	AU565	-0.037904	2.08264	0.962805	8.02563	733.57	5594.51	8.336
630600	BL-41	-0.624927	1.15222	0.5353	3.16522	491.3	284.38	5.913
630600	RPMI-7951	0.29946	1.88725	1.34913	6.60116	389.29	530.22	4.893
630600	ST486	-0.248146	1.61046	0.780246	5.00512	541.48	749	6.415
630600	A101D	-0.172687	1.91815	0.841401	6.80832	709.17	1210.76	8.092
630600	BFTC-905	0.550776	1.60492	1.7346	4.97745	186.95	191.39	2.87
630600	CAL-51	0.617725	1.72492	1.8547	5.61207	202.59	179.24	3.026
630600	A4-Fuk	-0.372891	1.10331	0.68874	3.01412	337.63	395.88	4.376
630600	A3-KAW	-0.84444	0.683416	0.429798	1.98063	360.83	180.93	4.608
630600	OCI-AML2	0.071144	1.91484	1.07374	6.78582	531.98	2591.49	6.32
630600	CML-T1	-0.205405	1.37986	0.814318	3.97434	388.06	771.77	4.881
630600	L-363	-0.521132	1.83972	0.593848	6.29481	960	453.02	10.6
630600	MDA-MB-415	0.716478	1.49122	2.04721	4.44253	117	108.13	2.17
630600	Jurkat	1.07214	1.53327	2.92161	4.63331	58.59	43.01	1.586
630600	BICR22	0.43413	1.60571	1.54362	4.9814	222.71	269.87	3.227
630600	HARA	-0.0115568	1.39597	0.98851	4.0389	308.58	12179.2	4.086
630600	Hep3B2-1-7	0.886667	1.85177	2.42703	6.37109	162.51	108.85	2.625
630600	TOV-21G	-0.300257	1.51898	0.740628	4.56755	516.71	605.89	6.167
630600	OCI-AML3	0.991489	1.93422	2.69524	6.91865	156.7	95.08	2.567
630600	CAL-29	0.825261	1.74403	2.28248	5.72035	150.62	111.33	2.506
630600	ALL-SIL	0.919712	1.92386	2.50857	6.84732	172.96	109.18	2.73
630600	AMO-1	-1.51308	1.24803	0.22023	3.48346	1481.74	182.48	15.817
630600	DND-41	0.728742	1.1585	2.07247	3.18516	53.69	58.97	1.537
630600	EJM	0.78722	1.79459	2.19728	6.01698	173.84	127.96	2.738
630600	WM793B	1.02181	2.18346	2.77821	8.877	219.52	113.69	3.195
630600	GA-10	-0.601547	1.53426	0.547963	4.63788	746.38	355.05	8.464
630600	JURL-MK1	0.712748	1.8516	2.03959	6.37003	212.32	159.78	3.123
630600	KCL-22	0.362004	1.63595	1.4362	5.13433	257.49	351.91	3.575
630600	KOPN-8	-0.620378	1.34919	0.537741	3.85429	616.76	317.48	7.168
630600	MOLM-13	-0.428273	0.672003	0.651633	1.95816	200.5	256.91	3.005
630600	OCI-M1	-0.032745	1.46032	0.967785	4.30732	345.07	4559.66	4.451
630600	SU-DHL-10	-0.231648	1.32839	0.793225	3.77497	375.9	673.45	4.759
630600	SU-DHL-5	-1.02942	0.8638	0.357215	2.37216	564.07	183.91	6.641
630600	SU-DHL-6	-1.59833	1.32094	0.202234	3.74696	1752.78	182.65	18.528
630600	SU-DHL-8	-0.658896	1.01366	0.517422	2.75568	432.58	253.84	5.326
630600	TE-4	1.06309	1.57649	2.8953	4.83796	67.1	48.29	1.671
743380	A673	-0.387123	1.92994	0.679007	6.8891	914.58	598.53	10.146
743380	SK-N-DZ	-0.600567	1.5419	0.548501	4.67346	752.04	356.74	8.52
743380	SBC-5	-1.86593	2.53625	0.154752	12.6322	8062.89	235.92	81.629
743380	HCC1954	-1.30099	1.97452	0.272263	7.20315	2545.66	251.77	26.457
743380	A498	-1.52098	2.4466	0.218498	11.5491	5185.67	260.86	52.857
743380	IGROV-1	-0.779879	1.83943	0.458461	6.29295	1272.62	335.86	13.726
743380	UACC-62	-0.98496	2.50241	0.373454	12.2119	3169.98	354.06	32.7
743380	BT-20	-0.930543	2.48198	0.39434	11.9649	2934.16	366.72	30.342
743380	COR-L105	-1.31137	1.65617	0.26945	5.23921	1844.41	226.29	19.444
743380	D-283MED	-0.865047	1.50693	0.421032	4.51287	971.86	274.2	10.719
743380	HCC70	-0.467138	2.54867	0.626794	12.7901	1940.56	645.59	20.406
743380	KMS-12-BM	-0.36311	2.22917	0.69551	9.29213	1236.02	713.91	13.36
743380	KU812	-1.32037	2.05576	0.267035	7.81277	2825.74	255.7	29.257
743380	LAMA-84	-2.7045	2.07244	0.066904	7.94418	11774	176.63	118.74
743380	MDA-MB-361	-1.24144	1.76308	0.288968	5.83035	1917.64	242.02	20.176
743380	MDA-MB-468	-1.94712	2.07265	0.142685	7.94585	5468.81	206.45	55.688
743380	MEG-01	-2.76801	2.2927	0.0627868	9.90164	15670.2	182.83	157.702
743380	MES-SA	-1.94806	2.09386	0.14255	8.11617	5593.54	207.48	56.935
743380	NCI-H28	-0.362833	2.51698	0.695702	12.3911	1681.09	793.7	17.811
743380	OS-RC-2	-0.654517	2.75051	0.519693	15.6505	2911.5	520.23	30.115
743380	RS4-11	-2.028	1.81022	0.131598	6.11178	4544.26	189.26	46.443
743380	OAW-42	-1.38159	2.80136	0.251179	16.467	6455.91	302.76	65.559
743380	CW-2	-0.487124	1.94264	0.614391	6.97717	1035.62	498.8	11.356
743380	AU565	-1.56591	2.34597	0.208897	10.4434	4899.31	249.81	49.993
743380	A4-Fuk	-1.66084	1.68593	0.18998	5.39748	2741.08	201.51	28.411
743380	MDA-MB-415	-0.75682	2.11198	0.469156	8.26462	1661.59	379.06	17.616
743380	MDA-MB-157	-1.35104	2.23736	0.25897	9.36859	3517.63	265.6	36.176
743380	LS-180	-0.485134	1.78876	0.615615	5.98203	871.72	468.71	9.717
743380	CCK-81	-0.775527	2.3468	0.460461	10.4521	2169.91	402.61	22.699
743380	Hep3B2-1-7	-0.811102	2.18537	0.444368	8.89394	1901.48	369.43	20.015
743380	IGR-37	-2.3473	2.6037	0.095627	13.5137	14031.6	210.92	141.316
743380	EFM-192A	-0.739631	2.15788	0.47729	8.65273	1712.89	391.75	18.129
743380	AMO-1	-1.13789	1.60203	0.320495	4.96307	1448.57	240.79	15.486
743380	huH-1	-0.536174	2.31636	0.584982	10.1387	1633.17	532.02	17.332
743380	NCI-H1781	-0.15606	2.5462	0.855508	12.7585	1391.34	1731.55	14.913
743380	NUGC-4	-1.03387	2.58972	0.355627	13.326	3647.19	350.49	37.472
743380	JURL-MK1	-1.40227	1.68564	0.246037	5.3959	2093.13	220.21	21.931
743380	TE-4	-0.290933	2.01645	0.747566	7.51158	904.81	793.1	10.048
Afuresertib	42-MG-BA	0.559865	1.56545	1.75044	4.78485	173.35	179.61	2.734
Afuresertib	8-MG-BA	0.937156	1.60717	2.55271	4.98865	95.43	71.49	1.954
Afuresertib	GB-1	2.23848	1.72196	9.37902	5.59548	40.34	23.07	0.597
Afuresertib	U-118-MG	1.35823	1.96099	3.8893	7.10638	82.72	44.38	1.827
Afuresertib	ChaGo-K-1	2.21376	1.83579	9.15008	6.27005	31.48	17.07	0.685
Afuresertib	Calu-3	2.21983	1.32307	9.20575	3.75493	59.21	40.4	0.408
Afuresertib	COR-L23	1.32321	1.47904	3.75545	4.38873	16.86	11.78	1.169
Afuresertib	NCI-H1648	0.0484312	0.92612	1.04962	2.52469	140.53	1812.24	2.405
Afuresertib	NCI-H2170	1.68779	1.64382	5.40751	5.17492	4.3	2.6	0.957
Afuresertib	NCI-H2228	2.30068	1.46651	9.98094	4.33407	56.58	36.26	0.434
Afuresertib	DMS-114	2.12895	1.90526	8.406	6.72116	20.04	10.51	0.8
Afuresertib	DMS-273	-0.59438	1.44558	0.551905	4.24433	669.03	343.21	7.69
Afuresertib	NCI-H1048	2.03213	2.06861	7.63031	7.91381	3.72	1.8	1.037
Afuresertib	NCI-H446	1.35447	1.71205	3.87471	5.54032	42.99	26.4	1.43
Afuresertib	NCI-H69	1.25404	1.79989	3.50447	6.04901	72.61	43.53	1.726
Afuresertib	SK-N-FI	2.11557	1.36735	8.29431	3.92492	52.68	35.37	0.473
Afuresertib	SBC-5	1.91386	1.55424	6.7792	4.7315	30.21	18.79	0.698
Afuresertib	SK-N-SH	1.7681	1.92686	5.85971	6.86792	17.21	8.98	1.172
Afuresertib	NCI-H2122	0.927341	1.00126	2.52778	2.72171	7.67	7.97	1.077
Afuresertib	NCI-H929	-2.57539	-2.53209	0.0761244	0.0794929	4.43	1.68	1.044
Afuresertib	NCI-H727	2.10254	1.66728	8.18697	5.29773	35.29	20.7	0.647
Afuresertib	LU-65	2.2434	1.54509	9.42533	4.68841	50.26	31.13	0.497
Afuresertib	TE-5	1.77237	1.42182	5.88476	4.14464	29.57	19.78	0.704
Afuresertib	HCC1954	1.62842	2.16206	5.09583	8.68899	70.51	32.77	1.705
Afuresertib	HCC1395	0.712868	1.47175	2.03983	4.35684	113.59	106.45	2.136
Afuresertib	HCC1599	1.76286	1.62424	5.82907	5.07455	12.94	7.86	0.871
Afuresertib	HCC2157	-1.14968	-0.869801	0.316738	0.419035	32.3	24.34	1.323
Afuresertib	CAL-33	2.29241	1.95182	9.89878	7.0415	28.86	14.86	0.711
Afuresertib	EBC-1	2.2848	1.74631	9.82368	5.73343	41.64	23.57	0.584
Afuresertib	EC-GI-10	1.61937	1.44624	5.0499	4.24709	15.9	10.69	0.841
Afuresertib	EPLC-272H	1.08664	0.0029028	2.96429	1.00291	66.17	99.73	0.338
Afuresertib	HSC-2	2.21115	1.14751	9.12625	3.15033	65.48	48.1	0.345
Afuresertib	KNS-62	0.55015	1.17032	1.73351	3.22302	85.92	112.73	1.859
Afuresertib	KYSE-140	0.163726	0.376698	1.17789	1.45746	23.74	130.08	1.237
Afuresertib	SK-MM-2	2.14193	1.91188	8.51586	6.7658	20.55	10.74	0.794
Afuresertib	TE-8	1.65938	1.51427	5.25605	4.5461	13.51	8.74	0.865
Afuresertib	HCT-116	2.151	1.37455	8.59347	3.9533	54	36.1	0.46
Afuresertib	HCT-15	1.81086	1.36425	6.11572	3.9128	36.02	24.66	0.64
Afuresertib	T47D	1.04711	1.93992	2.84941	6.95822	144.2	85.26	2.442
Afuresertib	A498	0.201604	1.49043	1.22336	4.43902	262.85	639.29	3.629
Afuresertib	BT-549	2.0354	1.38615	7.65532	3.99941	47.76	31.9	0.522
Afuresertib	SK-MEL-28	1.45504	1.56753	4.28465	4.79478	11.91	7.73	1.119
Afuresertib	SK-MEL-5	1.84167	1.7091	6.30709	5.52399	12.42	7.2	0.876
Afuresertib	Hs-578-T	1.60926	1.06261	4.9991	2.89393	42.11	33.97	0.579
Afuresertib	SK-OV-3	2.28107	1.81723	9.78713	6.15476	37.11	20.33	0.629
Afuresertib	IGROV-1	-1.56712	-0.506203	0.208645	0.60278	188.9	67.7	2.889
Afuresertib	SF539	0.73494	1.3394	2.08536	3.81676	83.03	82.25	1.83
Afuresertib	SF295	0.71041	1.89847	2.03483	6.67569	228.07	167.24	3.281
Afuresertib	KM12	-0.429049	0.266217	0.651128	1.30502	100.42	162.05	2.004
Afuresertib	AGS	0.896573	1.28226	2.45119	3.60477	47.06	43.02	1.471
Afuresertib	A2058	1.46746	1.77539	4.33821	5.90259	36.06	20.98	1.361
Afuresertib	697	1.07094	1.76166	2.91812	5.82211	99.52	64.5	1.995
Afuresertib	BT-20	1.82655	2.04266	6.21243	7.71112	24.12	11.83	1.241
Afuresertib	A2780	0.346652	-0.0030488	1.41432	0.996956	29.51	100.88	0.705
Afuresertib	COR-L105	2.12893	1.67526	8.40583	5.34021	36.47	21.31	0.635
Afuresertib	CHP-212	2.21326	1.18285	9.14549	3.26367	64.31	46.56	0.357
Afuresertib	Daudi	2.08185	1.1487	8.01927	3.15408	60.67	44.82	0.393
Afuresertib	DB	1.58137	1.6275	4.86163	5.09116	4.72	2.92	1.047
Afuresertib	D-283MED	2.20108	1.08701	9.03478	2.9654	67.18	50.61	0.328
Afuresertib	Detroit562	1.52562	0.524244	4.59798	1.68918	63.26	65.64	0.367
Afuresertib	DOHH-2	-1.11187	0.111306	0.328943	1.11774	239.8	110.01	3.398
Afuresertib	EFM-19	1.3396	1.24606	3.81752	3.47662	8.93	6.98	0.911
Afuresertib	EFO-27	-0.186214	1.00996	0.830096	2.7455	230.74	642.37	3.307
Afuresertib	FTC-133	0.911172	1.77302	2.48724	5.88861	136.75	94.59	2.368
Afuresertib	GAMG	2.04068	1.64642	7.69582	5.18835	32.58	19.32	0.674
Afuresertib	GDM-1	2.12274	1.67913	8.35403	5.36089	35.83	20.9	0.642
Afuresertib	GI-1	1.91867	1.30241	6.8119	3.67814	46	32.12	0.54
Afuresertib	H4	1.86141	1.71239	6.43277	5.5422	13.84	8.01	0.862
Afuresertib	HCC1569	-0.384524	0.905441	0.680775	2.47302	263.27	335.47	3.633
Afuresertib	HCC70	0.382934	1.14578	1.46658	3.1449	114.44	199.21	2.144
Afuresertib	HGC-27	-1.6283	-0.695408	0.196262	0.498871	154.19	57.29	2.542
Afuresertib	HH	1.71224	1.33775	5.54136	3.81048	31.24	21.87	0.688
Afuresertib	HOS	1.81293	1.32853	6.12835	3.7755	38.39	26.72	0.616
Afuresertib	HSC-3	1.25372	1.76369	3.50336	5.83395	66.52	40.68	1.665
Afuresertib	HSC-4	1.38832	1.87088	4.00809	6.49398	62.02	34.76	1.62
Afuresertib	HT-1197	1.17393	1.96279	3.2347	7.11916	120.09	67.2	2.201
Afuresertib	HT-144	2.11381	1.62036	8.27976	5.05492	38.95	23.34	0.611
Afuresertib	IGR-1	1.53553	1.54285	4.64377	4.67789	0.73	0.48	1.007
Afuresertib	JVM-3	0.445152	1.54066	1.56073	4.66767	199.07	246.1	2.991
Afuresertib	KALS-1	2.23032	1.7175	9.30284	5.57058	40.12	22.99	0.599
Afuresertib	KARPAS-422	0.194453	1.04117	1.21465	2.83253	133.2	435.43	2.332
Afuresertib	KMS-12-BM	1.12628	1.00042	3.08416	2.71941	11.83	11.18	0.882
Afuresertib	KU812	1.73629	1.15979	5.67625	3.18925	43.81	33.2	0.562
Afuresertib	KU-19-19	2.16618	1.66115	8.72493	5.26534	39.65	23.31	0.603
Afuresertib	KYSE-180	1.92032	1.4986	6.82313	4.47542	34.41	21.96	0.656
Afuresertib	L-428	2.26368	1.83195	9.61845	6.24602	35.06	19.07	0.649
Afuresertib	LAMA-84	2.15224	1.87604	8.60408	6.52761	24.13	12.83	0.759
Afuresertib	LOUCY	-1.30651	0.394362	0.270764	1.48344	447.87	130.18	5.479
Afuresertib	LoVo	0.95969	0.209787	2.61089	1.23342	52.76	78.14	0.472
Afuresertib	LS-411N	0.881086	1.27948	2.41352	3.59476	48.94	45.22	1.489
Afuresertib	MDA-MB-361	1.36776	0.351292	3.92654	1.4209	63.81	74.32	0.362
Afuresertib	MDA-MB-453	0.511997	1.50744	1.66862	4.51514	170.59	194.42	2.706
Afuresertib	MDA-MB-468	1.4359	1.92824	4.20344	6.87736	63.61	34.29	1.636
Afuresertib	MEL-HO	0.944746	1.56044	2.57216	4.76093	85.09	65.17	1.851
Afuresertib	MES-SA	0.682875	1.68725	1.97956	5.40459	173.02	147.08	2.73
Afuresertib	MFE-296	1.48519	1.58289	4.41579	4.86901	10.26	6.58	1.103
Afuresertib	MHH-CALL-2	2.08513	1.55701	8.04561	4.74461	41.03	25.33	0.59
Afuresertib	MKN1	2.13585	1.5344	8.46422	4.63855	45.2	28.16	0.548
Afuresertib	MOLT-16	0.582143	1.39966	1.78987	4.05381	126.49	140.43	2.265
Afuresertib	MONO-MAC-6	-0.969202	0.734079	0.379386	2.08356	449.19	175.74	5.492
Afuresertib	NALM-6	-1.0452	-0.156198	0.351621	0.85539	143.27	85.06	2.433
Afuresertib	NAMALWA	0.498885	0.500672	1.64688	1.64983	0.18	0.36	1.002
Afuresertib	NCI-H747	1.32828	1.82294	3.77455	6.19	63.99	37.24	1.64
Afuresertib	NCI-H716	2.22589	1.80469	9.26177	6.07811	34.37	18.92	0.656
Afuresertib	NCI-N87	2.05602	0.883201	7.81479	2.41863	69.05	57.04	0.309
Afuresertib	NCI-H1155	2.10341	1.92821	8.19404	6.87719	16.07	8.33	0.839
Afuresertib	NCI-H1436	2.16342	1.48894	8.70088	4.43241	49.06	31.18	0.509
Afuresertib	NCI-H2196	2.15361	1.93881	8.61587	6.95046	19.33	9.97	0.807
Afuresertib	OPM-2	-0.042964	1.2378	0.957946	3.44803	259.94	2981.02	3.599
Afuresertib	OS-RC-2	2.14734	1.82164	8.56202	6.18199	27.8	15.17	0.722
Afuresertib	P12-ICHIKAWA	0.742976	1.37864	2.10218	3.96952	88.83	85.56	1.888
Afuresertib	P31-FUJ	0.069608	1.72869	1.07209	5.63325	425.45	2383.46	5.254
Afuresertib	PF-382	1.47255	1.36738	4.36033	3.92504	9.98	7.14	0.9
Afuresertib	REH	0.814062	1.71225	2.25706	5.54144	145.52	110.33	2.455
Afuresertib	RKO	2.10658	1.28503	8.2201	3.61478	56.03	39	0.44
Afuresertib	RPMI-8402	-0.699707	0.996548	0.496731	2.70891	445.35	242.42	5.453
Afuresertib	RS4-11	1.54801	2.06864	4.70211	7.91409	68.31	33.63	1.683
Afuresertib	RVH-421	1.69628	1.39807	5.45362	4.04736	25.79	17.58	0.742
Afuresertib	SF126	1.10696	1.80286	3.02514	6.06699	100.55	62.87	2.006
Afuresertib	SIG-M5	-0.65443	1.57508	0.519738	4.83113	829.53	340.68	9.295
Afuresertib	SKM-1	1.52228	0.804642	4.58264	2.2359	51.21	47.14	0.488
Afuresertib	SK-MEL-3	1.1541	1.52229	3.17115	4.58269	44.51	31.9	1.445
Afuresertib	SK-MEL-24	1.92394	1.98149	6.84786	7.25356	5.92	2.99	1.059
Afuresertib	SK-MEL-31	1.55186	1.67968	4.72025	5.36385	13.63	8.24	1.136
Afuresertib	SNU-387	1.84474	1.92342	6.32642	6.84433	8.19	4.27	1.082
Afuresertib	SU-DHL-1	1.77195	1.39667	5.88231	4.04172	31.29	21.18	0.687
Afuresertib	SUP-T1	0.853364	1.71592	2.34753	5.56177	136.92	101.08	2.369
Afuresertib	SW1088	1.80837	1.68224	6.10048	5.37758	11.85	6.97	0.882
Afuresertib	SW48	1.33243	1.43515	3.79025	4.20027	10.82	7.71	1.108
Afuresertib	SW948	1.26267	1.40533	3.53485	4.07688	15.33	11.3	1.153
Afuresertib	T84	1.76059	1.96283	5.81586	7.11941	22.41	11.49	1.224
Afuresertib	THP-1	1.13072	1.63944	3.09789	5.15231	66.32	44.99	1.663
Afuresertib	UACC-893	-0.608775	-0.005628	0.544017	0.994388	82.79	99.08	1.828
Afuresertib	OE19	1.72721	1.5417	5.62492	4.67251	16.93	10.74	0.831
Afuresertib	NCI-H838	2.18084	1.32207	8.85372	3.75118	57.63	39.38	0.424
Afuresertib	OAW-42	2.08014	1.55826	8.00559	4.75057	40.66	25.09	0.593
Afuresertib	CW-2	2.17986	1.63886	8.84508	5.14928	41.78	24.82	0.582
Afuresertib	COLO-684	0.568489	1.43725	1.7656	4.20912	138.4	152.82	2.384
Afuresertib	COLO-668	1.89267	1.88267	6.63704	6.57106	0.99	0.53	0.99
Afuresertib	BFTC-909	1.1116	0.662984	3.03921	1.94057	36.15	40.36	0.639
Afuresertib	CA46	1.60669	1.27785	4.98629	3.58892	28.02	20.47	0.72
Afuresertib	AU565	1.35212	1.99381	3.86563	7.34347	89.97	47.46	1.9
Afuresertib	BL-41	1.6382	1.02881	5.14592	2.79772	45.63	37.2	0.544
Afuresertib	A204	1.79673	1.76752	6.0299	5.85634	2.88	1.63	0.971
Afuresertib	RL	1.98608	1.61598	7.28693	5.03281	30.93	18.63	0.691
Afuresertib	RPMI-7951	1.72281	1.90778	5.60024	6.73808	20.32	10.74	1.203
Afuresertib	SNU-C1	0.567877	1.54002	1.76452	4.66466	164.36	171.19	2.644
Afuresertib	ST486	2.26143	1.00983	9.59676	2.74513	71.4	55.35	0.286
Afuresertib	UACC-812	2.09131	1.72633	8.09548	5.62001	30.58	17.45	0.694
Afuresertib	23132-87	0.889532	0.860528	2.43399	2.36441	2.86	3.26	0.971
Afuresertib	CAL-51	0.561353	0.895354	1.75304	2.4482	39.65	59.5	1.397
Afuresertib	RERF-LC-MS	1.90821	0.664011	6.74103	1.94257	71.18	65.2	0.288
Afuresertib	A4-Fuk	0.3645	-0.34831	1.43979	0.70588	50.97	195.56	0.49
Afuresertib	COR-L279	1.52189	1.30995	4.5809	3.70597	19.1	13.93	0.809
Afuresertib	CAS-1	2.07591	1.74709	7.97179	5.7379	28.02	15.84	0.72
Afuresertib	CAL-54	0.253395	1.00059	1.28839	2.71988	111.11	294.87	2.111
Afuresertib	22RV1	1.55344	2.058	4.72772	7.83028	65.62	32.48	1.656
Afuresertib	BCPAP	1.88705	1.76159	6.59988	5.82169	11.79	6.65	0.882
Afuresertib	HDLM-2	2.03721	1.56731	7.6692	4.79375	37.49	23.07	0.625
Afuresertib	L-363	0.347563	0.998142	1.41561	2.71324	91.67	187.18	1.917
Afuresertib	MDA-MB-415	-0.857367	-0.051798	0.424278	0.949521	123.8	93.96	2.238
Afuresertib	NCI-H1975	1.05042	1.61941	2.85885	5.05012	76.65	54.17	1.766
Afuresertib	TE-441-T	2.12605	1.46576	8.38171	4.33082	48.33	31.06	0.517
Afuresertib	MKN45	1.42518	1.33375	4.15862	3.79524	8.74	6.42	0.913
Afuresertib	RL95-2	0.0581074	1.78318	1.05983	5.94873	461.29	2968.76	5.613
Afuresertib	TE-11	1.78579	1.90143	5.96429	6.69544	12.26	6.48	1.123
Afuresertib	TE-6	0.710937	1.21609	2.0359	3.37396	65.72	71.05	1.657
Afuresertib	BT-474	2.05086	1.64144	7.77458	5.16258	33.6	19.96	0.664
Afuresertib	CAMA-1	-1.04922	1.12768	0.350209	3.0885	781.9	207.48	8.819
Afuresertib	NB1	0.432964	1.14653	1.54182	3.14725	104.13	164.81	2.041
Afuresertib	Jurkat	-2.40116	-0.240259	0.0906126	0.786424	767.9	89.99	8.679
Afuresertib	LS-180	2.05686	1.58318	7.8214	4.87041	37.73	23.03	0.623
Afuresertib	BICR22	2.00786	1.91166	7.44736	6.76429	9.17	4.79	0.908
Afuresertib	CCK-81	2.21762	0.453925	9.18543	1.57448	82.86	79.53	0.171
Afuresertib	COLO-783	1.97227	1.8855	7.18698	6.58966	8.31	4.4	0.917
Afuresertib	EN	0.59918	1.7776	1.82063	5.91565	224.92	196.67	3.249
Afuresertib	HARA	0.967765	1.42449	2.63205	4.15572	57.89	47.19	1.579
Afuresertib	HCC-44	1.91717	1.6472	6.8017	5.19242	23.66	14.08	0.763
Afuresertib	Hep3B2-1-7	0.280524	0.972554	1.32382	2.64469	99.78	246.69	1.998
Afuresertib	Hs-683	1.83503	2.22509	6.26531	9.25432	47.71	21.26	1.477
Afuresertib	IGR-37	2.10547	2.11284	8.21093	8.27172	0.74	0.35	1.007
Afuresertib	MDST8	1.19802	1.48952	3.31355	4.43497	33.84	24.33	1.338
Afuresertib	NCI-H2023	2.11971	1.53206	8.32872	4.62771	44.44	27.72	0.556
Afuresertib	NCI-H647	1.51113	1.21452	4.53183	3.36869	25.67	19.63	0.743
Afuresertib	TOV-21G	0.188998	1.51416	1.20804	4.54562	276.28	701.15	3.763
Afuresertib	OCI-AML3	1.313	0.746864	3.71732	2.11037	43.23	43.12	0.568
Afuresertib	BICR31	1.8257	2.1134	6.20715	8.27637	33.34	15.76	1.333
Afuresertib	CAL-29	1.83551	1.15758	6.26834	3.18224	49.23	36.93	0.508
Afuresertib	EFM-192A	2.21884	1.72701	9.19666	5.6238	38.85	22.17	0.612
Afuresertib	FU97	1.12802	2.05692	3.08952	7.82186	153.17	82.35	2.532
Afuresertib	HCC-78	2.14889	1.84451	8.57536	6.32497	26.24	14.16	0.738
Afuresertib	HDQ-P1	1.50654	1.58261	4.51108	4.86762	7.9	5.05	1.079
Afuresertib	ALL-SIL	1.38891	2.02052	4.01049	7.54221	88.06	45.47	1.881
Afuresertib	AMO-1	0.795538	0.515438	2.21563	1.67437	24.43	35.21	0.756
Afuresertib	DND-41	2.11184	1.76487	8.26343	5.84081	29.32	16.43	0.707
Afuresertib	KMRC-1	1.98323	1.64726	7.26614	5.19274	28.54	16.94	0.715
Afuresertib	NCI-H1781	1.54155	1.77881	4.67184	5.92283	26.78	15.39	1.268
Afuresertib	NCI-H2110	1.95621	1.87761	7.07244	6.53784	7.56	4.02	0.924
Afuresertib	OE21	0.721534	1.4059	2.05759	4.07921	98.25	94.85	1.983
Afuresertib	RERF-LC-KJ	1.24184	1.86351	3.46196	6.4463	86.2	50.06	1.862
Afuresertib	T-T	1.9262	1.50394	6.86337	4.4994	34.44	21.92	0.656
Afuresertib	VCaP	1.10504	1.71568	3.01935	5.56043	84.16	55.26	1.842
Afuresertib	WM793B	2.20862	1.79693	9.10315	6.03112	33.75	18.64	0.663
Afuresertib	GA-10	1.1544	0.605986	3.17212	1.83306	42.21	47.51	0.578
Afuresertib	NB4	1.6939	-1.1629	5.44065	0.31258	94.25	168.65	0.057
Afuresertib	JEKO-1	0.991733	0.734286	2.6959	2.08399	22.7	25.96	0.773
Afuresertib	KOPN-8	2.08851	1.27396	8.07286	3.57497	55.72	39	0.443
Afuresertib	L-1236	1.55604	0.705308	4.74002	2.02447	57.29	54.67	0.427
Afuresertib	MOLM-13	1.04969	1.3387	2.85677	3.81407	33.51	27.53	1.335
Afuresertib	MOLM-16	0.930605	1.77897	2.53604	5.92376	133.58	91.16	2.336
Afuresertib	MOLP-8	2.115	0.157922	8.28959	1.17107	85.87	92.53	0.141
Afuresertib	NU-DUL-1	-0.49977	0.656094	0.60667	1.92725	217.68	231.28	3.177
Afuresertib	PL-21	1.58291	1.21554	4.86912	3.37212	30.74	23.21	0.693
Afuresertib	RCH-ACV	0.282436	-0.23745	1.32636	0.788636	40.54	184.07	0.595
Afuresertib	SU-DHL-10	-1.33477	-0.545238	0.263219	0.579704	120.24	59.15	2.202
Afuresertib	SU-DHL-4	-0.808983	0.487063	0.445311	1.62753	265.48	160.21	3.655
Afuresertib	SU-DHL-5	-1.52291	0.377902	0.218075	1.45922	569.14	124.81	6.691
Afuresertib	SU-DHL-6	-1.63973	-1.22053	0.194033	0.295074	52.07	25.57	1.521
Afuresertib	WSU-DLCL2	-2.77983	-2.43336	0.0620493	0.0877416	41.41	12.46	1.414
Afuresertib	OVK-18	0.805708	1.53278	2.23828	4.63101	106.9	90.24	2.069
Afuresertib	TE-4	1.99814	1.40361	7.37534	4.06985	44.82	29.75	0.552
Afuresertib	KMS-11	0.529292	0.965271	1.69773	2.6255	54.65	82.37	1.546
Afuresertib	MM1S	-1.5047	0.782484	0.222084	2.1869	884.72	152	9.847
Afuresertib	SNU-407	2.28323	1.3237	9.80836	3.75729	61.69	42.03	0.383
Afuresertib	SNU-81	1.4105	1.68064	4.09802	5.36897	31.01	19.15	1.31
Afuresertib	SNU-C5	1.88691	1.85666	6.59898	6.40229	2.98	1.6	0.97
AGI-6780	NCI-H1963	1.94702	1.80669	7.00775	6.09027	13.09	7.21	0.869
AGI-6780	NCI-H526	2.07185	1.33676	7.93947	3.80671	52.05	35.48	0.479
AGI-6780	DOHH-2	2.15405	1.60795	8.61973	4.99258	42.08	25.35	0.579
AGI-6780	DU-4475	2.16293	0.330361	8.69655	1.39147	84	84.73	0.16
AGI-6780	JVM-3	2.11995	1.4552	8.33069	4.28534	48.56	31.36	0.514
AGI-6780	L-540	2.19315	1.56311	8.96342	4.77366	46.74	28.73	0.533
AGI-6780	SNU-398	1.77908	1.57972	5.92438	4.85361	18.07	11.21	0.819
AGI-6780	AMO-1	1.71719	1.62842	5.56884	5.0958	8.49	5.17	0.915
AGI-6780	KCL-22	2.25251	2.00801	9.51158	7.44847	21.69	10.85	0.783
AGI-6780	SU-DHL-6	2.0047	1.34445	7.42384	3.83608	48.33	32.93	0.517
alpha-lipoic acid	HCC2157	4.48827	1.62573	88.9674	5.08215	94.29	63.78	0.057
alpha-lipoic acid	EM-2	4.18081	1.8831	65.4191	6.57383	89.95	54.96	0.1
AZ6102	A673	1.13841	1.8163	3.1218	6.14907	96.97	59.55	1.97
AZ6102	SK-ES-1	1.8183	1.19418	6.16138	3.30086	46.43	34.32	0.536
AZ6102	5637	2.26455	0.71516	9.62679	2.04451	78.76	68.42	0.212
AZ6102	RT4	1.91575	1.14186	6.79203	3.13258	53.88	40.4	0.461
AZ6102	8-MG-BA	1.54032	1.45228	4.66609	4.27285	8.43	5.72	0.916
AZ6102	COR-L23	1.90121	1.25693	6.69398	3.5146	47.5	33.89	0.525
AZ6102	NCI-H2170	1.87695	0.915088	6.53355	2.49699	61.78	51.25	0.382
AZ6102	COR-L311	1.73867	1.28415	5.68979	3.6116	36.52	26.14	0.635
AZ6102	DMS-114	1.9038	1.03277	6.71136	2.80885	58.15	45.75	0.419
AZ6102	DMS-273	2.10107	0.85564	8.17495	2.35288	71.22	59.28	0.288
AZ6102	NCI-H1048	1.93703	1.33417	6.9381	3.79685	45.28	31.12	0.547
AZ6102	NCI-H209	1.81939	1.42767	6.16807	4.16896	32.41	21.53	0.676
AZ6102	NCI-H446	1.10711	0.57427	3.02561	1.77583	41.31	48.13	0.587
AZ6102	NCI-H526	1.81542	1.84043	6.14368	6.29926	2.53	1.38	1.025
AZ6102	NCI-H69	1.8801	0.827813	6.55417	2.28831	65.09	55.97	0.349
AZ6102	NCI-H2052	2.04606	1.18909	7.73736	3.28408	57.56	41.88	0.424
AZ6102	SK-N-DZ	2.00914	1.38799	7.45689	4.00679	46.27	30.92	0.537
AZ6102	SBC-5	2.09206	1.68937	8.10157	5.41608	33.15	19.25	0.669
AZ6102	SK-N-SH	1.99368	1.49693	7.34249	4.46797	39.15	24.92	0.609
AZ6102	NCI-H2030	2.24493	0.355985	9.43972	1.42759	84.88	84.14	0.151
AZ6102	NCI-H2122	1.98936	1.20737	7.31086	3.34467	54.25	39.31	0.457
AZ6102	NCI-H929	2.08601	-0.336718	8.05276	0.71411	91.13	116.14	0.089
AZ6102	LU-65	2.04588	0.729208	7.73599	2.07344	73.2	64.36	0.268
AZ6102	NCI-H2009	1.98004	1.63082	7.243	5.10806	29.48	17.64	0.705
AZ6102	CAL-33	2.08231	1.5811	8.02301	4.86031	39.42	24.07	0.606
AZ6102	EC-GI-10	2.18358	1.13499	8.878	3.11113	64.96	48.02	0.35
AZ6102	KYSE-140	1.95193	0.3116	7.04225	1.36561	80.61	84.04	0.194
AZ6102	LXF-289	1.32356	1.49274	3.75676	4.44927	18.43	12.78	1.184
AZ6102	TE-10	2.00626	1.28738	7.43543	3.62329	51.27	35.83	0.487
AZ6102	HCT-15	1.76447	0.829252	5.83845	2.2916	60.75	53	0.393
AZ6102	A498	2.25695	0.920701	9.55386	2.51105	73.72	59.21	0.263
AZ6102	A549	1.24451	1.25355	3.47123	3.50275	0.91	0.73	1.009
AZ6102	ACHN	1.93653	1.03614	6.93468	2.8183	59.36	46.5	0.406
AZ6102	SK-MEL-28	1.70966	0.921261	5.52706	2.51246	54.54	46.11	0.455
AZ6102	Hs-578-T	2.05854	1.03977	7.83452	2.82856	63.9	49.49	0.361
AZ6102	CAKI-1	1.98473	0.844939	7.27707	2.32784	68.01	57.43	0.32
AZ6102	IGROV-1	0.476138	0.401369	1.60985	1.49387	7.2	15.7	0.928
AZ6102	LOXIMVI	1.62837	0.906737	5.09555	2.47623	51.4	44.32	0.486
AZ6102	SF539	1.7359	0.13557	5.67405	1.14519	79.82	92.19	0.202
AZ6102	OVCAR-8	2.16628	0.541954	8.72575	1.71936	80.3	74.98	0.197
AZ6102	BHT-101	1.87245	1.63877	6.50419	5.14884	20.84	12.48	0.792
AZ6102	AGS	0.933727	1.14878	2.54397	3.15434	23.99	23.03	1.24
AZ6102	ABC-1	1.17702	0.857092	3.2447	2.3563	27.38	27.18	0.726
AZ6102	A2058	1.19548	0.983646	3.30516	2.67419	19.09	17.72	0.809
AZ6102	A375	2.04973	1.38331	7.76581	3.98806	48.65	32.51	0.514
AZ6102	647-V	1.90907	1.71769	6.74682	5.57162	17.42	10.03	0.826
AZ6102	697	1.15696	0.0671208	3.18026	1.06942	66.37	94.2	0.336
AZ6102	A2780	1.45867	1.05018	4.30022	2.85817	33.53	28	0.665
AZ6102	COLO-792	0.530712	0.467148	1.70014	1.59544	6.16	11.98	0.938
AZ6102	COLO-679	1.24116	1.12803	3.45961	3.08957	10.7	9.11	0.893
AZ6102	CHP-212	1.40105	1.5106	4.05948	4.52943	11.58	7.82	1.116
AZ6102	CFPAC-1	1.61637	1.7819	5.03476	5.94112	18	10.24	1.18
AZ6102	Daudi	1.92824	1.62543	6.87737	5.08059	26.13	15.7	0.739
AZ6102	DB	1.70087	1.17653	5.4787	3.24309	40.81	30.83	0.592
AZ6102	Daoy	1.76599	1.70192	5.84736	5.48446	6.21	3.63	0.938
AZ6102	Detroit562	1.12347	0.680499	3.07551	1.97486	35.79	39.43	0.642
AZ6102	DU-4475	1.32107	0.67302	3.74743	1.96015	47.69	49.05	0.523
AZ6102	ECC10	2.09169	0.89555	8.09861	2.44868	69.76	57.19	0.302
AZ6102	EM-2	1.66173	0.9055	5.26842	2.47317	53.06	45.51	0.469
AZ6102	G-361	1.69778	1.60063	5.46178	4.95614	9.26	5.72	0.907
AZ6102	GAMG	1.62562	1.32119	5.08158	3.74789	26.25	18.73	0.738
AZ6102	GDM-1	1.76037	1.22971	5.81461	3.42025	41.18	30.14	0.588
AZ6102	GI-1	1.81236	0.70839	6.12489	2.03072	66.84	60.91	0.332
AZ6102	ESS-1	1.61849	1.30659	5.04545	3.69356	26.79	19.27	0.732
AZ6102	H4	0.5708	0.687456	1.76968	1.98865	12.37	20.44	1.124
AZ6102	HCC1569	1.75989	0.705508	5.81181	2.02488	65.16	59.91	0.348
AZ6102	HCC1806	1.35482	1.08312	3.87606	2.95389	23.79	20.05	0.762
AZ6102	HGC-27	1.4969	0.398142	4.46781	1.48906	66.67	73.4	0.333
AZ6102	HOS	2.18423	1.22487	8.88379	3.40373	61.69	43.92	0.383
AZ6102	HT-1197	2.20412	1.53577	9.06224	4.6449	48.74	30.32	0.513
AZ6102	HT-144	0.698017	1.23829	2.00976	3.44972	71.65	77.4	1.716
AZ6102	HuH-7	2.28966	0.64208	9.87159	1.90043	80.75	71.96	0.193
AZ6102	IGR-1	1.71262	1.48978	5.54349	4.43613	19.98	13.01	0.8
AZ6102	JVM-3	1.28084	1.70516	3.59968	5.50228	52.85	33.13	1.529
AZ6102	KATOIII	2.25446	-0.06476	9.53013	0.937292	90.16	102.87	0.098
AZ6102	KG-1	1.69332	1.26822	5.43748	3.55451	34.63	25.1	0.654
AZ6102	KMS-12-BM	2.07645	1.12911	7.97608	3.09292	61.22	45.62	0.388
AZ6102	KYSE-150	1.71043	0.919148	5.53132	2.50715	54.67	46.26	0.453
AZ6102	KYSE-180	2.10988	1.40696	8.24728	4.08354	50.49	33.32	0.495
AZ6102	KYSE-510	2.10862	2.28922	8.23685	9.86725	19.79	8.57	1.198
AZ6102	LAMA-84	1.2374	-1.09454	3.44665	0.334695	90.29	188.45	0.097
AZ6102	LOUCY	1.93922	1.18865	6.9533	3.28266	52.79	38.7	0.472
AZ6102	LoVo	2.04049	0.65759	7.69436	1.93014	74.91	67.77	0.251
AZ6102	LS-123	1.93218	0.22621	6.90457	1.25384	81.84	88.29	0.182
AZ6102	LS-513	0.798365	1.36698	2.2219	3.92347	76.58	71.22	1.766
AZ6102	MDA-MB-468	1.35749	0.688027	3.88642	1.98979	48.8	49.32	0.512
AZ6102	MEG-01	2.04308	1.0088	7.71435	2.74231	64.45	50.62	0.355
AZ6102	MES-SA	2.04706	1.10457	7.74508	3.01792	61.03	46.04	0.39
AZ6102	MOLT-16	1.21093	1.71783	3.35662	5.57245	66.01	41.86	1.66
AZ6102	MONO-MAC-6	1.09649	0.555312	2.99365	1.74248	41.79	49.36	0.582
AZ6102	NALM-6	1.67163	1.55656	5.32083	4.74247	10.87	6.88	0.891
AZ6102	NAMALWA	1.88938	1.29775	6.61528	3.66105	44.66	31.31	0.553
AZ6102	NOMO-1	1.91319	1.53957	6.77465	4.66259	31.18	19.53	0.688
AZ6102	NCI-H716	2.03449	-0.683323	7.64837	0.504937	93.4	133.59	0.066
AZ6102	NCI-N87	2.08366	-0.125641	8.03384	0.881931	89.02	106.03	0.11
AZ6102	NCI-H524	2.21316	1.21794	9.1446	3.38021	63.04	44.97	0.37
AZ6102	ONS-76	2.07629	1.19393	7.97486	3.30003	58.62	42.5	0.414
AZ6102	OPM-2	1.98413	-0.221233	7.27272	0.80153	88.98	111.15	0.11
AZ6102	P12-ICHIKAWA	1.51943	1.6734	4.56964	5.33024	16.64	10.13	1.166
AZ6102	PF-382	2.06787	1.51312	7.90799	4.54087	42.58	26.83	0.574
AZ6102	Raji	1.7023	2.12317	5.48653	8.3576	52.33	24.72	1.523
AZ6102	RCM-1	1.59264	1.25914	4.91672	3.52239	28.36	20.94	0.716
AZ6102	REH	1.72318	1.22753	5.60233	3.4128	39.08	28.76	0.609
AZ6102	RKO	2.00373	0.957463	7.41666	2.60508	64.88	52.22	0.351
AZ6102	RPMI-8402	1.85237	-0.382619	6.37491	0.682073	89.3	120.66	0.107
AZ6102	RS4-11	1.68769	1.92348	5.407	6.84475	26.59	13.97	1.266
AZ6102	SH-4	1.33624	1.03017	3.80472	2.80154	26.37	22.91	0.736
AZ6102	SIG-M5	1.03048	1.5688	2.8024	4.8009	71.31	52.24	1.713
AZ6102	SK-HEP-1	2.11563	1.85104	8.29477	6.36642	23.25	12.51	0.768
AZ6102	SKM-1	1.13007	1.05094	3.09586	2.86033	7.61	7	0.924
AZ6102	SK-MEL-24	2.04875	1.71626	7.75823	5.56367	28.29	16.23	0.717
AZ6102	SK-MEL-30	1.68809	0.992916	5.40916	2.69909	50.1	41.18	0.499
AZ6102	SK-UT-1	2.1247	1.30736	8.37042	3.69639	55.84	38.47	0.442
AZ6102	SNG-M	1.17877	0.824622	3.25039	2.28102	29.82	30.04	0.702
AZ6102	SNU-423	2.26078	1.52472	9.59053	4.59387	52.1	32.56	0.479
AZ6102	SUP-T1	1.7627	1.48565	5.82818	4.41785	24.2	15.72	0.758
AZ6102	SW948	1.7739	0.844787	5.89378	2.32748	60.51	52.38	0.395
AZ6102	OE19	2.18521	1.36577	8.89252	3.91873	55.93	37.5	0.441
AZ6102	NCI-H838	0.740348	1.22751	2.09667	3.4127	62.77	65.8	1.628
AZ6102	OE33	2.14064	0.913519	8.5049	2.49308	70.69	57.33	0.293
AZ6102	CHP-126	2.20086	2.24436	9.03281	9.43439	4.45	1.98	1.044
AZ6102	BFTC-909	1.33195	0.780856	3.78843	2.18334	42.37	41.38	0.576
AZ6102	CA46	1.70715	1.43211	5.51323	4.18754	24.05	16.11	0.76
AZ6102	AU565	1.8023	1.72821	6.06357	5.63058	7.14	4.11	0.929
AZ6102	BL-41	1.62292	0.757764	5.06785	2.1335	57.9	53.31	0.421
AZ6102	BV-173	2.03348	0.482066	7.6406	1.61942	78.81	76.29	0.212
AZ6102	RL	1.94681	1.55252	7.00629	4.72337	32.58	20.25	0.674
AZ6102	RPMI-7951	1.71461	1.83892	5.55451	6.28974	13.24	7.25	1.132
AZ6102	ST486	1.80168	1.15237	6.05984	3.16569	47.76	36.04	0.522
AZ6102	A704	1.43233	0.847218	4.18844	2.33315	44.3	40.85	0.557
AZ6102	A101D	1.30137	1.29586	3.67434	3.65413	0.55	0.42	0.994
AZ6102	23132-87	1.98376	0.77929	7.27	2.17992	70.01	60.72	0.3
AZ6102	BFTC-905	1.49433	0.413927	4.45637	1.51275	66.05	72.3	0.339
AZ6102	CAL-51	1.91181	1.0786	6.76534	2.94057	56.53	43.58	0.435
AZ6102	A4-Fuk	1.9577	-0.754941	7.08299	0.470039	93.36	138.56	0.066
AZ6102	A3-KAW	1.01964	-0.697325	2.77219	0.497916	82.04	168.39	0.18
AZ6102	COR-L279	2.07812	1.0537	7.98943	2.86825	64.1	49.3	0.359
AZ6102	CAS-1	2.20906	0.620416	9.10715	1.8597	79.58	71.91	0.204
AZ6102	OCI-AML2	1.92478	-0.072522	6.85365	0.930045	86.43	103.77	0.136
AZ6102	CML-T1	1.14473	2.15472	3.1416	8.62549	174.56	88.23	2.746
AZ6102	CAL-54	1.07233	0.932076	2.92217	2.53978	13.09	13.08	0.869
AZ6102	8505C	2.27159	1.50351	9.69476	4.49744	53.61	33.81	0.464
AZ6102	BCPAP	1.90982	0.792097	6.75187	2.20802	67.3	58.53	0.327
AZ6102	L-363	2.14077	1.15496	8.506	3.17389	62.69	46.05	0.373
AZ6102	MDA-MB-415	2.24954	0.898979	9.48339	2.45709	74.09	60.04	0.259
AZ6102	MKN45	2.29907	0.190304	9.96495	1.20962	87.86	91.72	0.121
AZ6102	RL95-2	1.52153	0.984019	4.57921	2.67519	41.58	35.33	0.584
AZ6102	TE-11	1.33102	0.0439548	3.78489	1.04494	72.39	96.7	0.276
AZ6102	Caov-4	1.05318	1.08846	2.86675	2.96969	3.59	3.35	1.036
AZ6102	Jurkat	1.74539	0.99046	5.72816	2.69247	53	43.25	0.47
AZ6102	LS-180	2.11006	0.924726	8.24873	2.52118	69.44	56.18	0.306
AZ6102	COLO-783	2.03392	1.53434	7.64397	4.63826	39.32	24.56	0.607
AZ6102	ES-2	1.88418	1.67375	6.58094	5.33215	18.98	11.17	0.81
AZ6102	HARA	1.72108	1.0301	5.59058	2.80134	49.89	40.15	0.501
AZ6102	Hs-683	2.23689	1.35066	9.36414	3.85996	58.78	39.62	0.412
AZ6102	KYM-1	1.19112	1.24171	3.29078	3.46152	5.19	4.25	1.052
AZ6102	MDST8	2.115	0.781355	8.28961	2.18443	73.65	63.06	0.264
AZ6102	ML-1	2.25984	0.977228	9.58159	2.65708	72.27	56.76	0.277
AZ6102	NCI-H1944	2.11986	1.07051	8.32997	2.91686	64.98	49.5	0.35
AZ6102	NCI-H211	2.26819	1.67295	9.66192	5.32786	44.86	26.24	0.551
AZ6102	NCI-H841	2.27176	1.04935	9.69642	2.85579	70.55	53.81	0.295
AZ6102	OVISE	2.24523	1.25694	9.44259	3.51464	62.78	44.02	0.372
AZ6102	RERF-GC-1B	1.51629	0.23307	4.5553	1.26247	72.29	84.63	0.277
AZ6102	TOV-21G	1.57355	0.312208	4.82375	1.36644	71.67	80.16	0.283
AZ6102	SUP-B15	1.87256	1.75198	6.50491	5.76601	11.36	6.44	0.886
AZ6102	OCI-AML3	1.93869	1.4332	6.94963	4.1921	39.68	26.07	0.603
AZ6102	BICR31	1.63049	1.94036	5.1064	6.96127	36.32	19	1.363
AZ6102	CAL-29	1.83672	1.21736	6.27592	3.37825	46.17	33.72	0.538
AZ6102	CL-11	1.1104	1.1167	3.03557	3.05475	0.63	0.57	1.006
AZ6102	DAN-G	2.21323	1.28562	9.14517	3.61691	60.45	41.91	0.395
AZ6102	FU97	2.16731	1.00955	8.73473	2.74437	68.58	53.42	0.314
AZ6102	HDQ-P1	0.691238	1.06435	1.99619	2.89895	45.22	53.98	1.452
AZ6102	ALL-SIL	1.80104	1.20775	6.05595	3.34596	44.75	32.94	0.553
AZ6102	AMO-1	1.35067	1.12954	3.86003	3.09422	19.84	16.37	0.802
AZ6102	DND-41	1.92127	1.33673	6.82959	3.80658	44.26	30.42	0.557
AZ6102	KMRC-1	1.14696	1.34025	3.14861	3.82001	21.32	16.85	1.213
AZ6102	KMRC-20	1.55635	1.95209	4.74146	7.04339	48.55	25.43	1.485
AZ6102	NCI-H1781	2.2898	1.65012	9.87296	5.2076	47.25	27.94	0.527
AZ6102	OCUM-1	1.84918	0.871155	6.35462	2.38967	62.39	52.89	0.376
AZ6102	RERF-LC-KJ	2.29335	1.59248	9.90811	4.91592	50.38	30.56	0.496
AZ6102	WM793B	1.88267	1.34341	6.57104	3.83207	41.68	28.64	0.583
AZ6102	GA-10	1.70366	1.17218	5.49402	3.22904	41.23	31.2	0.588
AZ6102	HCC1500	1.1814	1.16076	3.25893	3.19235	2.04	1.75	0.98
AZ6102	JEKO-1	1.94836	0.85293	7.01718	2.34651	66.56	56.22	0.334
AZ6102	JURL-MK1	1.2667	-0.33275	3.54914	0.716949	79.8	126.27	0.202
AZ6102	KCL-22	1.91378	0.772244	6.77866	2.16462	68.07	59.65	0.319
AZ6102	KOPN-8	1.54876	1.09856	4.70564	2.99985	36.25	29.07	0.638
AZ6102	L-1236	2.08296	0.875735	8.02822	2.40064	70.1	57.96	0.299
AZ6102	MOLM-13	1.37435	-0.80784	3.95251	0.44582	88.72	158.78	0.113
AZ6102	MOLM-16	1.2518	1.36974	3.49664	3.93434	12.52	9.42	1.125
AZ6102	MOLP-8	1.91332	0.911926	6.77557	2.48911	63.26	52.34	0.367
AZ6102	NCI-H1876	2.04936	1.26329	7.76295	3.53705	54.44	38.36	0.456
AZ6102	NU-DUL-1	1.56715	1.57314	4.79295	4.82175	0.6	0.38	1.006
AZ6102	OCI-AML5	1.62663	1.05681	5.08669	2.87718	43.44	35.03	0.566
AZ6102	OCI-LY-19	1.6213	1.74548	5.05964	5.72863	13.22	7.66	1.132
AZ6102	OCI-M1	1.68029	1.38464	5.36712	3.9934	25.6	17.6	0.744
AZ6102	PL-21	1.52164	1.57145	4.57975	4.81364	5.11	3.27	1.051
AZ6102	RCH-ACV	2.0524	0.839194	7.78653	2.3145	70.28	59.11	0.297
AZ6102	SU-DHL-10	1.51796	0.846585	4.56292	2.33167	48.9	44.23	0.511
AZ6102	SU-DHL-4	1.45533	0.864156	4.28591	2.373	44.63	40.62	0.554
AZ6102	SU-DHL-5	1.20006	0.980282	3.32032	2.66521	19.73	18.31	0.803
AZ6102	SU-DHL-6	1.7046	0.394782	5.49917	1.48406	73.01	76.84	0.27
AZ6102	SU-DHL-8	1.82083	1.44301	6.17696	4.23344	31.46	20.75	0.685
AZ6102	WSU-DLCL2	1.4484	1.54966	4.25628	4.70985	10.66	6.99	1.107
AZ6102	JHOS-2	2.03744	1.13749	7.67097	3.11892	59.34	44.17	0.407
AZ6102	OV-7	1.68144	1.30477	5.37329	3.68686	31.39	22.4	0.686
AZ6102	OV-56	2.08792	1.28508	8.06815	3.61497	55.19	38.45	0.448
AZ6102	MM1S	1.92225	0.612362	6.83635	1.84478	73.02	68.14	0.27
AZ6102	SNU-175	1.6098	0.795408	5.0018	2.21534	55.71	50.59	0.443
AZD1208	NCI-H1876	1.26521	1.7938	3.54384	6.01224	69.65	41.78	1.697
AZD1332	RT4	1.75753	1.68482	5.79807	5.39146	7.01	4.14	0.93
AZD1332	42-MG-BA	2.00195	1.55643	7.40348	4.74186	35.95	22.25	0.64
AZD1332	NCI-H2085	2.01043	1.59542	7.4665	4.93041	33.97	20.64	0.66
AZD1332	NCI-H2228	1.56056	1.07715	4.76149	2.9363	38.33	30.98	0.617
AZD1332	NCI-H446	1.92623	1.15822	6.86356	3.18426	53.61	39.87	0.464
AZD1332	NCI-H526	2.2212	0.762022	9.2184	2.1426	76.76	65.69	0.232
AZD1332	HSC-2	1.86465	1.21022	6.45369	3.35421	48.03	35.1	0.52
AZD1332	TE-8	1.86418	1.19593	6.45066	3.30662	48.74	35.85	0.513
AZD1332	A549	2.16762	1.52337	8.73749	4.58765	47.49	29.72	0.525
AZD1332	Hs-578-T	1.39218	1.0543	4.0236	2.86998	28.67	24.27	0.713
AZD1332	IGROV-1	1.30139	0.825709	3.67439	2.2835	37.85	36.55	0.621
AZD1332	LOXIMVI	1.72718	0.85681	5.62475	2.35563	58.12	50.39	0.419
AZD1332	SF539	1.40084	1.2455	4.05863	3.47468	14.39	11.09	0.856
AZD1332	AGS	2.06602	1.46504	7.89331	4.32773	45.17	29.09	0.548
AZD1332	639-V	1.71627	1.87737	5.56373	6.53628	17.48	9.39	1.175
AZD1332	A2780	0.673066	0.464487	1.96024	1.5912	18.83	30.99	0.812
AZD1332	CHP-212	1.53451	1.29483	4.63906	3.65037	21.31	15.62	0.787
AZD1332	D-283MED	1.04338	0.354212	2.8388	1.42506	49.8	66.05	0.502
AZD1332	DOHH-2	2.06411	-0.39919	7.87827	0.670863	91.48	119.34	0.085
AZD1332	DU-4475	1.92301	0.838797	6.84152	2.31358	66.18	56.38	0.338
AZD1332	ECC10	0.732656	1.14058	2.0806	3.12858	50.37	55.68	1.504
AZD1332	EFO-27	2.14826	1.45613	8.56992	4.28934	49.95	32.22	0.501
AZD1332	ESS-1	1.14235	1.04367	3.13412	2.83962	9.4	8.64	0.906
AZD1332	HuH-7	1.31099	1.3038	3.70984	3.68327	0.72	0.55	0.993
AZD1332	KATOIII	-0.418033	-0.675177	0.658341	0.509066	22.67	61.51	0.773
AZD1332	KG-1	2.03796	1.34248	7.67492	3.82852	50.12	34.13	0.499
AZD1332	L-540	2.21337	0.777604	9.14652	2.17625	76.21	64.87	0.238
AZD1332	LAMA-84	2.15597	0.670009	8.63629	1.95425	77.37	68.92	0.226
AZD1332	LOUCY	1.84556	0.59772	6.33164	1.81797	71.29	67.61	0.287
AZD1332	NCI-H716	-1.70363	-0.312164	0.182021	0.731861	302.08	81.68	4.021
AZD1332	NCI-H596	2.29121	1.60884	9.88693	4.99702	49.46	29.78	0.505
AZD1332	NCI-H524	1.28117	0.788886	3.60084	2.20094	38.88	38.42	0.611
AZD1332	OPM-2	0.953965	0.445323	2.59598	1.56099	39.87	53.32	0.601
AZD1332	RT-112	1.1302	0.88811	3.09628	2.43053	21.5	21.42	0.785
AZD1332	Saos-2	2.13739	1.34985	8.4773	3.85684	54.5	36.85	0.455
AZD1332	SW48	2.23545	1.20202	9.3507	3.32684	64.42	46.23	0.356
AZD1332	YH-13	2.17654	1.12377	8.81571	3.07644	65.1	48.37	0.349
AZD1332	A704	0.519977	1.46467	1.68199	4.32609	157.2	181.68	2.572
AZD1332	23132-87	1.93437	1.33641	6.91966	3.80535	45.01	30.91	0.55
AZD1332	A4-Fuk	1.14887	0.868903	3.15464	2.38429	24.42	24.37	0.756
AZD1332	CAS-1	1.54059	1.63058	4.66735	5.10683	9.42	5.84	1.094
AZD1332	CAL-54	0.35721	0.610839	1.42934	1.84198	28.87	71	1.289
AZD1332	Hep3B2-1-7	1.33383	1.36769	3.79555	3.92628	3.44	2.54	1.034
AZD1332	RERF-GC-1B	1.67378	1.63044	5.33231	5.10611	4.24	2.59	0.958
AZD1332	HCC-78	1.83972	1.13749	6.29478	3.11894	50.45	38.17	0.495
AZD1332	huH-1	2.1515	1.62388	8.59779	5.07271	41	24.52	0.59
AZD1332	OVTOKO	1.64156	1.56193	5.16321	4.768	7.65	4.85	0.923
AZD1332	GA-10	1.98271	0.141442	7.26241	1.15193	84.14	92.87	0.159
AZD1332	L-1236	1.76263	1.6601	5.82773	5.25983	9.74	5.82	0.903
AZD1332	MOLM-13	-2.98401	-0.798486	0.0505897	0.45001	789.53	73.24	8.895
AZD1332	MOLP-8	2.26868	0.866213	9.66659	2.37789	75.4	61.82	0.246
AZD1332	NCI-H1876	1.20097	1.27164	3.32334	3.56669	7.32	5.88	1.073
AZD1332	OCI-M1	1.63918	0.540288	5.15094	1.7165	66.68	67.04	0.333
AZD1332	SU-DHL-6	1.69206	0.789116	5.43065	2.20145	59.46	53.36	0.405
AZD5363	SK-ES-1	1.56583	1.55768	4.78666	4.74779	0.81	0.52	0.992
AZD5363	42-MG-BA	1.40268	1.97886	4.06607	7.23446	77.92	41.08	1.779
AZD5363	8-MG-BA	2.02575	1.90143	7.58178	6.69545	11.69	6.14	0.883
AZD5363	U-118-MG	1.58173	1.66962	4.86335	5.31013	9.19	5.56	1.092
AZD5363	COR-L23	1.56114	1.64277	4.76424	5.16947	8.51	5.23	1.085
AZD5363	NCI-H1648	1.08391	1.12895	2.9562	3.09241	4.61	4.16	1.046
AZD5363	NCI-H2170	1.97737	1.49726	7.22371	4.46941	38.13	24.28	0.619
AZD5363	COR-L311	1.65325	1.82935	5.22392	6.22981	19.26	10.65	1.193
AZD5363	DMS-273	0.309991	1.60389	1.36341	4.97236	264.7	417.4	3.647
AZD5363	NCI-H1048	2.06485	1.9488	7.88413	7.02027	10.96	5.62	0.89
AZD5363	NCI-H209	1.91858	1.98318	6.8113	7.26583	6.67	3.37	1.067
AZD5363	NCI-H446	1.66026	2.12243	5.26067	8.35139	58.75	27.84	1.588
AZD5363	NCI-H69	1.60629	1.48994	4.9843	4.43682	10.98	7.24	0.89
AZD5363	NCI-H2122	1.19935	0.800769	3.31795	2.22725	32.87	33.23	0.671
AZD5363	NCI-H929	-1.28481	0.043636	0.276704	1.0446	277.52	103.4	3.775
AZD5363	HCC1954	1.53803	1.89241	4.6554	6.63531	42.53	23.04	1.425
AZD5363	HCC1395	1.71471	1.7004	5.55506	5.47615	1.42	0.83	0.986
AZD5363	HCC2157	-0.691954	1.09805	0.500597	2.9983	498.95	258.69	5.989
AZD5363	EC-GI-10	2.11613	1.55066	8.29898	4.71456	43.19	26.72	0.568
AZD5363	EPLC-272H	1.88264	1.34028	6.5708	3.82013	41.86	28.81	0.581
AZD5363	KNS-62	1.09203	1.2887	2.98032	3.62806	21.73	18.01	1.217
AZD5363	KYSE-140	0.843626	0.991931	2.32478	2.69644	15.99	17.58	1.16
AZD5363	TE-8	1.65239	1.66619	5.21943	5.29197	1.39	0.84	1.014
AZD5363	HCT-15	2.20646	1.78087	9.08347	5.93499	34.66	19.29	0.653
AZD5363	HL-60	1.93337	1.84421	6.91279	6.32311	8.53	4.61	0.915
AZD5363	T47D	1.95204	2.16406	7.04303	8.70638	23.62	10.86	1.236
AZD5363	A498	1.20068	1.69294	3.32237	5.43542	63.6	41	1.636
AZD5363	Hs-578-T	1.33325	1.76447	3.79333	5.83846	53.91	32.34	1.539
AZD5363	IGROV-1	-0.55622	0.729331	0.573372	2.07369	261.67	231.12	3.617
AZD5363	LOXIMVI	1.52677	1.29295	4.60327	3.64352	20.85	15.31	0.792
AZD5363	UACC-62	1.88754	1.36437	6.60309	3.91325	40.74	27.72	0.593
AZD5363	SF539	0.991928	1.79565	2.69643	6.02336	123.38	81.03	2.234
AZD5363	SF295	1.56524	1.97472	4.78383	7.20463	50.6	26.16	1.506
AZD5363	KM12	0.553328	0.698026	1.73903	2.00978	15.57	26.15	1.156
AZD5363	Becker	2.03266	1.53248	7.63439	4.62963	39.36	24.61	0.606
AZD5363	AGS	1.84165	0.571362	6.30691	1.77068	71.92	68.98	0.281
AZD5363	A2058	1.72641	1.88705	5.62042	6.59986	17.43	9.3	1.174
AZD5363	697	0.984178	1.73841	2.67561	5.68827	112.6	76.64	2.126
AZD5363	BT-20	1.365	2.0979	3.91574	8.14903	108.11	53.69	2.081
AZD5363	A2780	1.02325	0.946378	2.78222	2.57636	7.4	7.51	0.926
AZD5363	Detroit562	1.06823	1.53156	2.91021	4.62537	58.94	43.37	1.589
AZD5363	DOHH-2	-1.34043	0.886629	0.261733	2.42693	827.26	166.15	9.273
AZD5363	EFM-19	2.03673	1.56991	7.66547	4.8062	37.3	22.92	0.627
AZD5363	EFO-27	0.916496	1.28354	2.50051	3.60939	44.35	40.05	1.443
AZD5363	FTC-133	1.25425	1.99709	3.50522	7.3676	110.19	59.23	2.102
AZD5363	GDM-1	1.6635	1.74186	5.27775	5.70796	8.15	4.71	1.082
AZD5363	H4	1.54001	1.9392	4.66466	6.9532	49.06	25.92	1.491
AZD5363	HCC1569	0.487618	1.57279	1.62843	4.82006	195.99	222.54	2.96
AZD5363	HCC70	0.297533	1.90918	1.34653	6.74754	401.1	541.67	5.011
AZD5363	HGC-27	-0.649785	0.340561	0.522158	1.40574	169.22	152.41	2.692
AZD5363	HSC-3	1.66031	1.8559	5.26092	6.39747	21.6	11.78	1.216
AZD5363	HSC-4	1.79492	2.35658	6.01902	10.5548	75.36	31.29	1.754
AZD5363	JVM-3	1.24612	1.69361	3.47684	5.43907	56.44	35.91	1.564
AZD5363	KARPAS-422	1.15704	1.6966	3.18049	5.45537	71.53	46.63	1.715
AZD5363	LOUCY	-0.351809	0.84047	0.703414	2.31746	229.46	338.9	3.295
AZD5363	LoVo	1.41126	1.12885	4.10112	3.09211	24.6	20.01	0.754
AZD5363	LS-411N	1.35165	1.45826	3.8638	4.29847	11.25	7.89	1.112
AZD5363	MDA-MB-361	2.11931	1.37657	8.3254	3.96128	52.42	35.05	0.476
AZD5363	MDA-MB-453	1.66957	1.02476	5.30989	2.78644	47.52	38.62	0.525
AZD5363	MEL-HO	1.78712	0.497425	5.97225	1.64448	72.46	72.17	0.275
AZD5363	MES-SA	1.8791	1.03015	6.54759	2.80148	57.21	45.18	0.428
AZD5363	MOLT-16	0.303406	2.10938	1.35446	8.24311	508.59	595.23	6.086
AZD5363	MONO-MAC-6	0.668028	1.2367	1.95039	3.44422	76.59	85.13	1.766
AZD5363	NALM-6	0.536337	1.10354	1.70973	3.01483	76.33	105.76	1.763
AZD5363	NAMALWA	1.69038	1.58803	5.42153	4.8941	9.73	6.05	0.903
AZD5363	NCI-H747	1.37351	1.64587	3.9492	5.18554	31.31	19.83	1.313
AZD5363	NCI-H716	1.985	1.61069	7.27904	5.00626	31.22	18.86	0.688
AZD5363	NCI-H1155	1.90468	2.33196	6.71728	10.2981	53.31	22.43	1.533
AZD5363	NCI-H2196	1.7534	1.92788	5.7742	6.87493	19.06	9.95	1.191
AZD5363	OPM-2	0.826557	1.64649	2.28544	5.18875	127.04	99.2	2.27
AZD5363	P12-ICHIKAWA	0.675424	1.84451	1.96487	6.32501	221.91	173.09	3.219
AZD5363	P31-FUJ	1.64298	1.45787	5.17057	4.29681	16.9	11.27	0.831
AZD5363	PF-382	1.26385	1.88089	3.53902	6.55933	85.34	48.82	1.853
AZD5363	REH	1.65466	1.99167	5.23132	7.32778	40.08	20.37	1.401
AZD5363	RPMI-8402	0.608358	1.81252	1.83741	6.12586	233.4	197.94	3.334
AZD5363	RVH-421	1.59665	1.47536	4.93649	4.37263	11.42	7.6	0.886
AZD5363	SF126	1.35362	2.04848	3.8714	7.75609	100.34	51.33	2.003
AZD5363	SIG-M5	-0.256313	1.66665	0.7739	5.29441	584.12	750.24	6.841
AZD5363	SK-MEL-3	1.04351	1.45442	2.83917	4.28198	50.82	39.38	1.508
AZD5363	SK-MEL-31	1.76985	1.8205	5.86995	6.17496	5.2	2.86	1.052
AZD5363	SUP-T1	1.69906	2.13389	5.46882	8.44766	54.47	25.59	1.545
AZD5363	SW1088	1.30054	1.36046	3.67129	3.898	6.18	4.61	1.062
AZD5363	SW1710	2.29169	2.2019	9.89168	9.04215	8.59	3.92	0.914
AZD5363	SW48	1.40725	1.52923	4.08472	4.61464	12.97	8.67	1.13
AZD5363	THP-1	1.49328	1.96346	4.45166	7.12393	60.03	31.49	1.6
AZD5363	UACC-893	-0.297148	1.02196	0.742934	2.77863	274.01	443.92	3.74
AZD5363	WM-115	2.05657	1.88201	7.8191	6.56672	16.02	8.49	0.84
AZD5363	YH-13	1.98387	1.75438	7.27082	5.77986	20.51	11.57	0.795
AZD5363	COLO-684	1.58276	1.46985	4.86839	4.3486	10.68	7.13	0.893
AZD5363	BFTC-909	1.10186	1.69519	3.00975	5.44766	81	53.85	1.81
AZD5363	AU565	1.79978	1.87017	6.04833	6.4894	7.29	3.91	1.073
AZD5363	RL	1.64998	2.06154	5.20687	7.85805	50.92	24.94	1.509
AZD5363	RPMI-7951	1.75256	1.92285	5.76936	6.84045	18.57	9.72	1.186
AZD5363	SNU-C1	2.12856	1.40624	8.40278	4.08058	51.44	33.93	0.486
[truncated: 4,052 more rows]

## Sheet: DrugCell_R1
DrugCell_R1: Random split 1 prediction results
[truncated: 5,021 more rows]

[truncated: 11 more sheets: DrugCell_NCC3, DrugCell_NCD4, PaccMann_R4, PaccMann_NCC3, PaccMann_NCD3, Precily_R3, Precily_NCC5, Precily_NCD1, tCNN_R5, tCNN_NCC1, tCNN_NCD4]
