# Supplementary material for: Benchmarking Deep Learning Models for Predicting Anticancer Drug Potency (IC50): Insights for the Medicinal Chemist
Source: Research Square preprint supplement (doi:10.21203/rs.3.rs-7023097/v1), 2025-07-15
Supplement: Supplementary file 2 [file a3e1732f53707401badf60dd.pdf]

# Supplementary Information

## Benchmarking Deep Learning Models for Predicting Anticancer Drug Potency (IC<sub>50</sub>): Insights for the Medicinal Chemist

Udbhas Garai<sup>1†</sup>, Aditya S. Pal<sup>2†</sup>, Koyel Ghosh<sup>2</sup>, Deepak B. Salunke<sup>3</sup> and Utpal Garain<sup>2,4\*</sup>

<sup>1</sup>Department of Chemical Sciences, Indian Institute of Science Education and Research Mohali, Punjab 140306, India

<sup>2</sup>Computer Vision & Pattern Recognition [CVPR] Unit, Indian Statistical Institute, Kolkata, West Bengal 700108, India

<sup>3</sup>Department of Medicinal Chemistry, National Institute of Pharmaceutical Education and Research, S.A.S. Nagar, Punjab 160062, India

<sup>4</sup>Centre for Artificial Intelligence and Machine Learning (CAIML), Indian Statistical Institute, Kolkata, West Bengal 700108, India

\*Correspondence: utpal@isical.ac.in

<sup>†</sup>These authors contributed equally to this work.

| Contents              |                                                                                                                                                                                 |    |
|-----------------------|---------------------------------------------------------------------------------------------------------------------------------------------------------------------------------|----|
| Supplementary Fig. 1  | The two SMILES representations.                                                                                                                                                 | S2 |
| Supplementary Table 1 | Prediction performance comparison of four deep learning models on unseen anticancer compounds from literature using isomeric and canonical (or generic) SMILES representations. | S2 |
|                       | Proof of $\sigma(\Delta x) = \sqrt{2} \times \sigma(x)$ used in EVAPA derivation                                                                                                | S3 |

**a**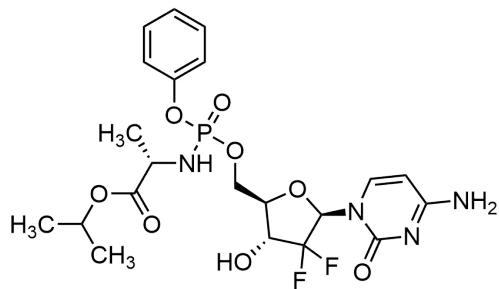

NC1=NC(N(C=C1)[C@H]2C(F)(F)[C@H](O)[C@@H](COP(OC3=CC=CC=C3)(N[C@@H](C)C(OC(C)C)=O)=O)O2)=O

**b**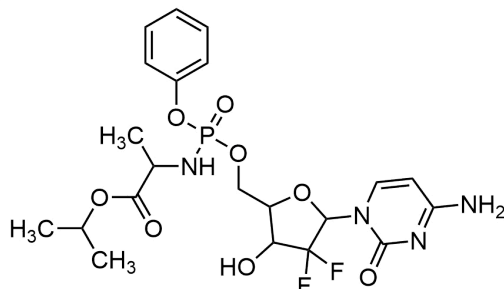

NC1=NC(N(C=C1)C2C(F)(F)C(O)C(COP(OC3=CC=CC=C3)(NC(C)C(OC(C)C)=O)=O)O2)=O

Supplementary Fig. 1: The two SMILES representations. (a) Isomeric SMILES representation that encodes that stereochemical (chiral) information of the molecule. “@” lists neighboring atoms anticlockwise; “@@” lists them clockwise. (b) Canonical or Generic SMILES representation that does not have any stereochemical information. No “@” or “@@” symbols used.

Supplementary Table 1: Prediction performance of four deep learning models on unseen anticancer compounds from literature using isomeric and canonical (or generic) SMILES representations.

| Model    | Isomeric SMILES |                                |              |                                                     | Canonical/Generic SMILES |                                |              |                                                     |
|----------|-----------------|--------------------------------|--------------|-----------------------------------------------------|--------------------------|--------------------------------|--------------|-----------------------------------------------------|
|          | r               | MAPE(IC <sub>50</sub> )<br>(%) | EVAPA<br>(%) | within 3 $\sigma$ <sub>IC<sub>50</sub></sub><br>(%) | r                        | MAPE(IC <sub>50</sub> )<br>(%) | EVAPA<br>(%) | within 3 $\sigma$ <sub>IC<sub>50</sub></sub><br>(%) |
| DeepCDR  | 0.6381          | 2268.44                        | 37.50        | 12.50                                               | 0.6291                   | 2346.34                        | 40.63        | 15.63                                               |
| DrugCell | 0.4829          | 2507.52                        | 37.50        | 18.75                                               | 0.5246                   | 1167.97                        | 56.25        | 9.38                                                |
| PaccMann | -0.4650         | 6836.81                        | 31.25        | 6.25                                                | -0.3540                  | 3445.20                        | 34.38        | 6.25                                                |
| Precily  | 0.6384          | 2920.53                        | 40.63        | 12.50                                               | 0.5311                   | 4205.95                        | 34.38        | 6.25                                                |

**Proof of  $\sigma(\Delta x) = \sqrt{2} \times \sigma(x)$  used in EVAPA derivation**

Let  $x_1$  and  $x_2$  be 2 independent variables. Using the property of variance for sums of independent variables, we can write:

$$\text{Var}(x_1 - x_2) = \text{Var}(x_1) + \text{Var}(x_2) - 2 \text{Cov}(x_1, x_2)$$

Since  $x_1$  and  $x_2$  are independent,  $\text{Cov}(x_1, x_2) = 0$ . Thus,

$$\begin{aligned} & \text{Var}(x_1 - x_2) = \text{Var}(x_1) + \text{Var}(x_2) - 2 \text{Cov}(x_1, x_2) \\ \implies & \text{Var}(x_1 - x_2) = \text{Var}(x_1) + \text{Var}(x_2) \quad (\because \text{Cov}(x_1, x_2) = 0) \\ \implies & \text{Var}(\Delta x) = \text{Var}(x_1) + \text{Var}(x_2) \\ \implies & \sigma^2(\Delta x) = \sigma^2(x_1) + \sigma^2(x_2) \\ \implies & \sigma^2(\Delta x) = 2 \sigma^2(x) \\ \implies & \sigma(\Delta x) = \sqrt{2} \sigma(x) \end{aligned}$$
