# Supplementary material for: Benchmarking Deep Learning Models for Predicting Anticancer Drug Potency (IC50): Insights for the Medicinal Chemist
Source: Research Square preprint supplement (doi:10.21203/rs.3.rs-7023097/v1), 2025-07-15
Supplement: Supplementary file 2 [file e53d42d1757cbf060a1d24b6.xlsx]

## Sheet: Summary_splits_-GDSC_Dataset
Model	Expt.	MAPE LnIC50	MAPE IC50	Pearson Corr.	R^2	MSE	RMSE	EVAPA
DeepCDR	R1	304.67	121.04	0.878	0.7629	0.9765	0.9882	94.84
	R2	283.05	122.22	0.8809	0.7743	0.9294	0.9641	94.86
	R3	311.47	148.72	0.8736	0.7631	0.9756	0.9877	94.5
	R4	246.39	152.2	0.8752	0.7648	0.9685	0.9841	94.88
	R5	278.02	137.91	0.8728	0.7603	0.9872	0.9936	94.64
	Avg	284.72	136.42	0.8761	0.7651	0.9674	0.9835	94.74
	SD	25.64	14.5	0.0033	0.0054	0.0223	0.0114	0.17
	NCC1	777.42	258.95	0.8053	0.631	1.4652	1.2104	90.33
	NCC2	836.59	231.83	0.8062	0.6351	1.4487	1.2036	90.08
	NCC3	1078.25	256.63	0.8016	0.6356	1.4467	1.2028	90.23
	NCC4	724.03	278.79	0.7999	0.6296	1.4707	1.2127	90.08
	NCC5	725.02	243.74	0.8213	0.6644	1.3323	1.1543	90.85
	Avg	828.27	253.99	0.8069	0.6392	1.4327	1.1968	90.31
	SD	147.2	17.62	0.0085	0.0144	0.0571	0.0241	0.32
	NCD1	386.24	6685.1	0.3131	-0.1405	5.4203	2.3281	71.63
	NCD2	432.65	6355.34	0.2746	-0.2758	6.0633	2.4624	67.21
	NCD3	446.32	7486.44	0.2676	-0.233	5.8599	2.4207	67.31
	NCD4	450.15	6608.49	0.2845	-0.2513	5.9467	2.4386	67.54
	NCD5	417.97	6295.67	0.2764	-0.217	5.7838	2.405	68
	Avg	426.67	6686.21	0.2832	-0.2235	5.8148	2.411	68.34
	SD	25.9	476.55	0.0177	0.0513	0.2438	0.051	1.87
DrugCell	R1	324.89	177.76	0.8712	0.759	0.9927	0.9964	94.64
	R2	319.15	174.35	0.8689	0.7546	1.0107	1.0053	94.28
	R3	347.19	195.32	0.8694	0.7503	1.0284	1.0141	94.04
	R4	319.08	175.81	0.8714	0.759	0.9924	0.9962	94.48
	R5	313.21	168.95	0.8701	0.7566	1.0022	1.0011	94.38
	Avg	324.71	178.44	0.8702	0.7559	1.0053	1.0026	94.36
	SD	13.23	9.99	0.0011	0.0036	0.015	0.0074	0.22
	NCC1	635.33	337.37	0.7802	0.5746	1.6904	1.3001	87.21
	NCC2	1149.1	282.6	0.7972	0.611	1.5459	1.2433	88.6
	NCC3	854	271.26	0.8047	0.6358	1.4474	1.2031	89.56
	NCC4	841.04	259.82	0.7961	0.6232	1.4975	1.2237	88.94
	NCC5	1128.49	290.14	0.7951	0.6139	1.5342	1.2386	88.83
	Avg	921.59	288.24	0.7947	0.6117	1.5431	1.2418	88.63
	SD	216.55	29.77	0.0089	0.0229	0.0908	0.0362	0.87
	NCD1	538.61	11256.7	-0.0123	-0.7848	8.4823	2.9124	56.48
	NCD2	550.08	14016	-0.028	-0.831	8.702	2.9499	55.52
	NCD3	527.65	9719.7	-0.0218	-0.7326	8.2341	2.8695	56.67
	NCD4	543.68	13190.4	-0.0472	-0.8317	8.7052	2.9505	56.71
	NCD5	546.57	10113.7	-0.0073	-0.7925	8.5186	2.9187	55.88
	Avg	541.32	11659.3	-0.0233	-0.7945	8.5284	2.9202	56.25
	SD	8.72	1884.9	0.0156	0.0408	0.1938	0.0333	0.53
PaccMann	R1	350.12	528.36	0.803	0.6209	1.5613	1.2495	89.98
	R2	261.9	300.23	0.7875	0.6182	1.5723	1.2539	89.78
	R3	324.62	232.33	0.8113	0.6353	1.5018	1.2255	89.32
	R4	326.36	329.6	0.8079	0.6456	1.4598	1.2082	90.77
	R5	316.14	346.76	0.8025	0.6299	1.5237	1.2344	89.97
	Avg	315.83	347.46	0.8024	0.63	1.5238	1.2343	89.96
	SD	37.74	127.19	0.0105	0.0128	0.0527	0.0214	0.61
	NCC1	1257.67	166.33	0.7897	0.5989	1.594	1.2625	87.9
	NCC2	1110.25	495.48	0.7222	0.4884	2.0329	1.4258	86.94
	NCC3	1143.69	332.02	0.7995	0.6234	1.4964	1.2233	89.23
	NCC4	1223	346.15	0.7484	0.5494	1.7908	1.3382	86.15
	NCC5	1184.63	335.11	0.7599	0.5586	1.73	1.3153	87.5
	Avg	1183.85	335.02	0.7639	0.5637	1.7288	1.313	87.54
	SD	68.34	134.58	0.0361	0.0596	0.237	0.0893	1.33
	NCD1	469.26	2655.51	0.1195	-0.4715	6.9934	2.6445	53.63
	NCD2	520.17	2470.74	0.1478	-0.6303	7.748	2.7835	52.08
	NCD3	447.12	2143.01	0.1324	-0.4238	6.7667	2.6013	53.75
	NCD4	529.17	3249.26	0.0679	-0.6615	7.8963	2.81	50.19
	NCD5	490.11	2631.85	0.1171	-0.5478	7.3399	2.7092	51.97
	Avg	491.17	2630.07	0.1169	-0.547	7.3489	2.7098	52.32
	SD	39.6	464.28	0.0347	0.1168	0.5551	0.1025	1.67
Precily	R1	311.67	613.88	0.7283	0.5156	1.9949	1.4124	86.87
	R2	266.07	431.6	0.8113	0.6527	1.4304	1.196	92.47
	R3	269.82	261.43	0.8444	0.7073	1.2055	1.098	92.93
	R4	252.5	307.11	0.8317	0.6879	1.2855	1.1338	92.73
	R5	271.69	251.94	0.8324	0.6909	1.273	1.1283	92.83
	Avg	274.35	373.19	0.8096	0.6509	1.4379	1.1937	91.57
	SD	22.17	152.4	0.047	0.0782	0.322	0.1273	2.63
	NCC1	859.4	247.13	0.7811	0.6021	1.5813	1.2575	90.44
	NCC2	804.8	192.72	0.8128	0.6508	1.3878	1.1781	92.02
	NCC3	947.15	249.74	0.8096	0.6539	1.3753	1.1728	90.9
	NCC4	727.11	218.05	0.8169	0.6654	1.3298	1.1532	91.77
	NCC5	703.46	189.79	0.8234	0.6712	1.3067	1.1431	92.42
	Avg	808.38	219.48	0.8088	0.6487	1.3962	1.1809	91.51
	SD	99.36	28.64	0.0163	0.0273	0.1086	0.0451	0.82
	NCD1	336.65	3610.76	0.3197	0.0642	4.4476	2.1089	70.33
	NCD2	475.11	4838.89	0.3169	-0.1312	5.3759	2.3186	63
	NCD3	477.99	4329.13	0.2848	-0.1599	5.5125	2.3479	61.79
	NCD4	512.86	5082.1	0.2622	-0.2159	5.7786	2.4039	59.85
	NCD5	464.59	4522.16	0.2853	-0.1288	5.3647	2.3162	62.15
	Avg	453.44	4476.61	0.2938	-0.1143	5.2959	2.2991	63.42
	SD	67.76	563.78	0.0243	0.1058	0.5027	0.112	4.03
tCNN	R1	265.49	170.34	0.8518	0.71	1.1942	1.0928	94.06
	R2	275.16	281.43	0.8064	0.6483	1.4485	1.2035	91.41
	R3	275.95	237.49	0.8599	0.7272	1.309	1.06	92.37
	R4	283.3	220.12	0.8362	0.6822	1.309	1.1441	92.51
	R5	279.55	171.72	0.8421	0.6917	1.2698	1.1268	94.34
	Avg	275.89	216.22	0.8393	0.6919	1.3061	1.1255	92.94
	SD	6.65	46.92	0.0205	0.0299	0.0924	0.0543	1.23
	NCC1	642.42	166.35	0.8207	0.6584	1.3565	1.1647	92.27
	NCC2	656.66	201.71	0.8237	0.6748	1.2914	1.1364	91.92
	NCC3	787.72	222.78	0.8129	0.6608	1.3467	1.1605	90.81
	NCC4	859.59	229.27	0.8251	0.6798	1.2713	1.1275	92.25
	NCC5	998.44	222.64	0.8203	0.671	1.3061	1.1428	91.21
	Avg	788.97	208.55	0.8205	0.669	1.3144	1.1464	91.69
	SD	148.2	25.78	0.0047	0.0091	0.0363	0.0158	0.65
	NCD1	321.4	5079.19	0.3142	-0.0166	4.8313	2.198	72.19
	NCD2	201.89	3200.29	0.1915	-0.0072	4.7868	2.1879	70.38
	NCD3	263.88	5135.12	0.2775	-0.0273	4.8824	2.2096	72.58
	NCD4	204.74	3823.79	0.2751	0.0391	4.5669	2.137	73.67
	NCD5	252.49	3780.69	0.3197	0.0854	4.3466	2.0849	72.52
	Avg	248.88	4203.82	0.2756	0.0147	4.6828	2.1635	72.27
	SD	49.12	860.83	0.0513	0.047	0.2231	0.052	1.19

## Sheet: ChemicalProps_vs_PredAccuracy
drug	CID	SMILES	Count	MW (Da)	clogP	HBD	HBA	RotB	N_aromatic	frac sp3	DeepCDR Drugwise MAPE IC50	DrugCell Drugwise MAPE IC50
50869	50869	C1=CC=C(C=C1)OCCCCCCNN	6	208.305	2.0891	2	3	8	1	0.5	31.16	32.0574
150412	150412	CC(CO)(CO)NCC1=CC2=C(C=C1)C3=C(C=C2)C4=CC=CC=C4C=C3	2	345.442	3.9791	3	3	5	4	0.217391	47.255	46.0258
630600	630600	C1=CC=C(C=C1)C(=CC2=CC=C(C=C2)Br)C3=CC=CC=C3	15	335.244	6.038	0	0	3	3	0	48.274	49.7854
741909	741909	C1=CC=C2C(=C1)N=C3N2C(=O)C(=CC4=C(C=CC=C4Cl)Cl)S3	8	347.226	3.7637	0	4	1	4	0	169.491	122.89
743380	743380	COC1=CC(=C(C=C1NS(=O)(=O)C2=CC=C(C=C2)F)OC)Cl	12	345.779	3.2971	1	4	5	2	0.142857	125.762	60.5183
765771	765771	CC1=CC(=C(C=C1)NC(=O)[C@@H]2CCCN2C(=O)C3=CC=CS3)C	2	328.437	3.60824	1	3	3	2	0.333333	165.055	126.798
776928	776928	COC1=CC=CC(=C1)NC(=S)NC(=O)/C=C/C2=CC=CO2	37	302.355	2.8146	2	4	4	2	0.0666667	25.6659	16.9616
5-azacytidine	9444	C1=NC(=NC(=O)N1[C@H]2[C@@H]([C@@H]([C@H](O2)CO)O)O)N	52	244.207	-3.168	4	9	2	1	0.625	68.4906	55.665
5-Fluorouracil	3385	C1=C(C(=O)NC(=O)N1)F	30	130.078	-0.7977	2	2	0	1	0	99.1353	91.1654
Acetalax	8269	CC(=O)OC1=CC=C(C=C1)C2(C3=CC=CC=C3NC2=O)C4=CC=C(C=C4)OC(=O)C	40	401.418	3.8237	1	5	4	3	0.125	240.731	267.634
Afatinib	10184653	CN(C)C/C=C/C(=O)NC1=C(C=C2C(=C1)C(=NC=N2)NC3=CC(=C(C=C3)F)Cl)O[C@H]4CCOC4	74	485.947	4.3899	2	7	8	3	0.291667	1434.84	1997.41
Afuresertib	46843057	CN1C(=C(C=N1)Cl)C2=C(SC(=C2)C(=O)N[C@@H](CC3=CC(=CC=C3)F)CN)Cl	42	427.332	3.8943	2	5	6	3	0.222222	60.8743	238.988
AGI-6780	71299339	C1CC1NS(=O)(=O)C2=CC(=C(C=C2)C3=CSC=C3)NC(=O)NC4=CC=CC(=C4)C(F)(F)F	4	481.521	5.5186	3	4	6	3	0.190476	26.5575	41.1605
AGK2	2130404	C1=CC2=C(C=CC=N2)C(=C1)NC(=O)/C(=C/C3=CC=C(O3)C4=C(C=CC(=C4)Cl)Cl)/C#N	2	434.282	6.34728	1	4	4	4	0	9.87	20.3163
Alisertib	24771867	COC1=C(C(=CC=C1)F)C2=NCC3=CN=C(N=C3C4=C2C=C(C=C4)Cl)NC5=CC(=C(C=C5)C(=O)O)OC	55	518.932	5.7461	2	7	6	4	0.111111	170.565	159.287
Alpelisib	56649450	CC1=C(SC(=N1)NC(=O)N2CCC[C@H]2C(=O)N)C3=CC(=NC=C3)C(C)(C)C(F)(F)F	18	441.479	3.83502	2	5	4	2	0.473684	128.818	156.79
AMG-319	68947304	C[C@@H](C1=C(N=C2C=C(C=CC2=C1)F)C3=CC=CC=N3)NC4=NC=NC5=C4NC=N5	2	385.406	4.2753	2	6	4	5	0.0952381	33.62	36.7973
ascorbate (vitamin C)	54670067	C([C@@H]([C@@H]1C(=C(C(=O)O1)O)O)O)O	2	176.124	-1.4074	4	6	2	0	0.5	15.535	95.453
AT13148	24905401	C1=CC(=CC=C1C2=CNN=C2)[C@@](CN)(C3=CC=C(C=C3)Cl)O	22	313.788	2.9247	3	3	4	3	0.117647	63.9827	80.3796
Axitinib	6450551	CNC(=O)C1=CC=CC=C1SC2=CC3=C(C=C2)C(=NN3)/C=C/C4=CC=CC=N4	26	386.48	4.6391	2	4	5	4	0.0454545	134.297	139.031
AZ6102	135905416	C[C@@H]1CN(C[C@@H](N1)C)C2=NC=C(C(=C2)C)C3=CC=C(C=C3)C4=NC5=C(C=CN5C)C(=O)N4	52	428.54	3.48562	2	6	3	4	0.32	42.4825	47.789
AZ960	25099184	CC1=CC(=NN1)NC2=C(C=C(C(=N2)N[C@@H](C)C3=CC=C(C=C3)F)C#N)F	56	354.364	4.1797	3	5	5	3	0.166667	74.1898	66.9422
AZD1332	49831044	CC(C)OC1=NNC(=C1)NC2=NC(=NC=C2Cl)NC(C)C3=NC=C(C=C3)F	9	391.838	4.0911	3	7	7	3	0.294118	79.5311	293.818
AZD2014	25262792	C[C@H]1COCCN1C2=NC(=NC3=C2C=CC(=N3)C4=CC(=CC=C4)C(=O)NC)N5CCOC[C@@H]5C	44	462.554	2.5016	1	8	4	3	0.44	98.9134	109.843
AZD3759	78209992	C[C@@H]1CN(CCN1C(=O)OC2=C(C=C3C(=C2)C(=NC=N3)NC4=C(C(=CC=C4)Cl)F)OC)C	2	459.909	4.3092	1	7	4	3	0.318182	168.185	374.157
AZD4547	51039095	C[C@@H]1CN(C[C@@H](N1)C)C2=CC=C(C=C2)C(=O)NC3=NNC(=C3)CCC4=CC(=CC(=C4)OC)OC	28	463.582	3.651	3	6	8	3	0.384615	83.8864	67.2785
AZD5153	118693659	C[C@@H]1C(=O)N(CCN1CCOC2=CC=C(C=C2)C3CCN(CC3)C4=NN5C(=NN=C5OC)C=C4)C	55	479.585	2.0582	0	9	7	3	0.52	81.8956	196.045
AZD5363	25227436	C1CN(CCC1(C(=O)N[C@@H](CCO)C2=CC=C(C=C2)Cl)N)C3=NC=NC4=C3C=CN4	37	428.924	2.1489	4	6	6	3	0.380952	39.9524	71.2512
AZD5438	16747683	CC1=NC=C(N1C(C)C)C2=NC(=NC=C2)NC3=CC=C(C=C3)S(=O)(=O)C	40	371.466	3.37652	1	7	5	3	0.277778	59.0343	58.3571
AZD5991	131634760	CC1=C2C(=NN1C)CSCC3=NN(C(=C3)CSC4=CC5=CC=CC=C5C(=C4)OCCCC6=C(N(C7=C6C=CC(=C27)Cl)C)C(=O)O)C	23	672.276	8.17622	1	9	1	6	0.285714	547.903	441.589
AZD6482	44137675	CC1=CN2C(=O)C=C(N=C2C(=C1)[C@@H](C)NC3=CC=CC=C3C(=O)O)N4CCOCC4	5	408.458	2.71082	2	7	5	3	0.318182	38.964	43.0865
AZD6738	54761306	C[C@@H]1COCCN1C2=NC(=NC(=C2)C3(CC3)[S@](=N)(=O)C)C4=C5C=CNC5=NC=C4	53	412.519	2.91067	2	7	4	3	0.45	49.4085	55.8033
AZD7762	11152667	C1C[C@@H](CNC1)NC(=O)C2=C(C=C(S2)C3=CC(=CC=C3)F)NC(=O)N	96	362.43	2.5266	4	4	4	2	0.294118	173.941	158.265
AZD8055	25262965	C[C@H]1COCCN1C2=NC(=NC3=C2C=CC(=N3)C4=CC(=C(C=C4)OC)CO)N5CCOC[C@@H]5C	61	465.554	2.6429	1	9	5	3	0.48	97.5115	124.271
AZD8186	52913813	C[C@H](C1=CC(=CC2=C1OC(=CC2=O)N3CCOCC3)C(=O)N(C)C)NC4=CC(=CC(=C4)F)F	22	457.477	3.7827	1	6	5	3	0.333333	45.5173	49.9712
BI-2536	11364421	CC[C@@H]1C(=O)N(C2=CN=C(N=C2N1C3CCCC3)NC4=C(C=C(C=C4)C(=O)NC5CCN(CC5)C)OC)C	90	521.666	3.5568	2	8	7	2	0.571429	539.493	242.454
BMS-536924	135440466	CC1=CC(=CC2=C1N=C(N2)C3=C(C=CNC3=O)NC[C@H](C4=CC(=CC=C4)Cl)O)N5CCOCC5	54	479.968	3.86212	4	6	6	4	0.28	103.598	121.532
BMS-754807	24785538	C[C@]1(CCCN1C2=NN3C=CC=C3C(=N2)NC4=NNC(=C4)C5CC5)C(=O)NC6=CN=C(C=C6)F	35	461.505	3.6051	3	8	6	4	0.347826	313.583	526.934
Bosutinib	5328940	CN1CCN(CC1)CCCOC2=C(C=C3C(=C2)N=CC(=C3NC4=CC(=C(C=C4Cl)Cl)OC)C#N)OC	12	530.456	5.19038	1	8	9	3	0.384615	209.842	344.455
Bromosporine	72943187	CCOC(=O)NC1=CC(=NN2C1=NN=C2C)C3=CC(=C(C=C3)C)NS(=O)(=O)C	9	404.452	2.34804	2	8	5	3	0.294118	32.0867	31.8813
Buparlisib	16654980	C1COCCN1C2=NC(=NC(=C2)C3=CN=C(C=C3C(F)(F)F)N)N4CCOCC4	73	410.4	1.8128	1	8	3	2	0.5	41.8752	50.2195
Camptothecin	24360	CC[C@@]1(C2=C(COC1=O)C(=O)N3CC4=CC5=CC=CC=C5N=C4C3=C2)O	54	348.358	2.0796	1	6	1	3	0.25	118.161	75.1479
CCT-018159	984170	CCC1=CC(=C(C=C1O)O)C2=NNC(=C2C3=CC4=C(C=C3)OCCO4)C	2	352.39	3.79692	3	5	3	3	0.25	67.61	79.7993
Cediranib	9933475	CC1=CC2=C(N1)C=CC(=C2F)OC3=NC=NC4=CC(=C(C=C43)OC)OCCCN5CCCC5	41	450.514	5.22422	1	6	8	4	0.36	48.7761	53.2312
CHIR-99021	9956119	CC1=CN=C(N1)C2=CN=C(N=C2C3=C(C=C(C=C3)Cl)Cl)NCCNC4=NC=C(C=C4)C#N	5	465.348	4.9396	3	7	7	4	0.136364	60.274	30.7036
Crizotinib	11626560	C[C@H](C1=C(C=CC(=C1Cl)F)Cl)OC2=C(N=CC(=C2)C3=CN(N=C3)C4CCNCC4)N	27	450.345	5.0377	2	6	5	3	0.333333	72.5878	68.5422
Cytarabine	6253	C1=CN(C(=O)N=C1N)[C@H]2[C@H]([C@@H]([C@H](O2)CO)O)O	24	243.219	-2.563	4	8	2	1	0.555556	100.151	149.967
Dabrafenib	44462760	CC(C)(C)C1=NC(=C(S1)C2=NC(=NC=C2)N)C3=C(C(=CC=C3)NS(=O)(=O)C4=C(C=CC=C4F)F)F	12	519.574	5.3649	2	7	5	4	0.173913	71.2083	836.812
Dactolisib	11977753	CC(C)(C#N)C1=CC=C(C=C1)N2C3=C4C=C(C=CC4=NC=C3N(C2=O)C)C5=CC6=CC=CC=C6N=C5	54	469.548	5.89378	0	6	3	6	0.133333	63.3948	78.2378
Daporinad	6914657	C1CN(CCC1CCCCNC(=O)/C=C/C2=CN=CC=C2)C(=O)C3=CC=CC=C3	46	391.515	3.9337	1	3	8	2	0.375	223.096	225.293
Dasatinib	3062316	CC1=C(C(=CC=C1)Cl)NC(=O)C2=CN=C(S2)NC3=CC(=NC(=N3)C)N4CCN(CC4)CCO	31	488.017	3.31354	3	9	7	3	0.363636	1707.98	3197.87
Dihydrorotenone	243725	CC(C)[C@H]1CC2=C(O1)C=CC3=C2O[C@@H]4COC5=CC(=C(C=C5[C@@H]4C3=O)OC)OC	18	396.439	3.7832	0	6	3	2	0.434783	178.802	177.285
Dinaciclib	46926350	CCC1=C2N=C(C=C(N2N=C1)NCC3=C[N+](=CC=C3)[O-])N4CCCC[C@H]4CCO	74	396.495	2.2785	2	7	7	3	0.47619	164.399	100.622
Doramapimod	156422	CC1=CC=C(C=C1)N2C(=CC(=N2)C(C)(C)C)NC(=O)NC3=CC=C(C4=CC=CC=C43)OCCN5CCOCC5	2	527.669	5.98642	2	6	7	4	0.354839	23.83	22.3425
Elephantin	442205	CC(=CC(=O)O[C@H]1CC2=C[C@@H](C[C@@]3([C@H](O3)[C@@H]4[C@@H]1C(=C)C(=O)O4)C)OC2=O)C	32	374.389	1.7653	0	7	2	0	0.55	38.7344	37.5644
Elesclomol	300471	CN(C(=S)C1=CC=CC=C1)NC(=O)CC(=O)NN(C)C(=S)C2=CC=CC=C2	9	400.529	2.0539	2	4	4	2	0.157895	304.098	178.067
Entinostat	4261	C1=CC=C(C(=C1)N)NC(=O)C2=CC=C(C=C2)CNC(=O)OCC3=CN=CC=C3	50	376.416	3.3425	3	5	6	3	0.0952381	71.38	90.6854
Entospletinib	59473233	C1COCCN1C2=CC=C(C=C2)NC3=NC(=CN4C3=NC=C4)C5=CC6=C(C=C5)C=NN6	11	411.469	3.8528	2	7	4	5	0.173913	46.3455	41.969
Epirubicin	41867	C[C@H]1[C@@H]([C@H](C[C@@H](O1)O[C@H]2C[C@@](CC3=C2C(=C4C(=C3O)C(=O)C5=C(C4=O)C(=CC=C5)OC)O)(C(=O)CO)O)N)O	82	543.525	0.0013	6	12	5	2	0.444444	106.806	103.54
Erlotinib	176870	COCCOC1=C(C=C2C(=C1)C(=NC=N2)NC3=CC=CC(=C3)C#C)OCCOC	36	393.443	3.4051	1	7	10	3	0.272727	70.1006	78.7844
Fludarabine	657237	C1=NC2=C(N=C(N=C2N1[C@H]3[C@H]([C@@H]([C@H](O3)CO)O)O)F)N	12	285.235	-1.8409	4	9	2	2	0.5	414.314	705.007
Foretinib	42642645	COC1=CC2=C(C=CN=C2C=C1OCCCN3CCOCC3)OC4=C(C=C(C=C4)NC(=O)C5(CC5)C(=O)NC6=CC=C(C=C6)F)F	103	632.664	5.7724	2	8	12	4	0.323529	107.919	88.6473
Fulvestrant	104741	C[C@]12CC[C@H]3[C@H]([C@@H]1CC[C@@H]2O)[C@@H](CC4=C3C=CC(=C4)O)CCCCCCCCCS(=O)CCCC(C(F)(F)F)(F)F	1	606.782	8.6826	2	3	14	1	0.8125	51.76	58.5115
Gefitinib	123631	COC1=C(C=C2C(=C1)N=CN=C2NC3=CC(=C(C=C3)F)Cl)OCCCN4CCOCC4	3	446.91	4.2756	1	7	8	3	0.363636	31.23	40.9677
Gemcitabine	60750	C1=CN(C(=O)N=C1N)[C@H]2C([C@@H]([C@H](O2)CO)O)(F)F	92	263.2	-1.2886	3	7	2	1	0.555556	239.113	255.113
glutathione	124886	C(CC(=O)N[C@@H](CS)C(=O)NCC(=O)O)[C@@H](C(=O)O)N	1	307.328	-2.2061	6	6	9	0	0.6	32.27	86.226
GNE-317	70676303	CC1=C(SC2=C1N=C(N=C2N3CCOCC3)C4=CN=C(N=C4)N)C5(COC5)OC	68	414.491	1.74742	1	10	4	3	0.473684	69.4224	88.0054
GSK2606414	53469448	CN1C=C(C2=C(N=CN=C21)N)C3=CC4=C(C=C3)N(CC4)C(=O)CC5=CC(=CC=C5)C(F)(F)F	9	451.452	4.3681	1	5	3	4	0.208333	36.6844	34.0873
GSK269962A	16095342	CCN1C2=CC(=NC=C2N=C1C3=NON=C3N)OC4=CC=CC(=C4)NC(=O)C5=CC=C(C=C5)OCCN6CCOCC6	11	570.61	3.839	2	12	10	5	0.275862	219.634	252.428
GSK343	71268957	CCCC1=C(C(=O)NC(=C1)C)CNC(=O)C2=C3C=NN(C3=CC(=C2)C4=CC(=NC=C4)N5CCN(CC5)C)C(C)C	7	541.7	4.31022	2	7	8	4	0.419355	44.2857	24.6766
I-BET-762	46943432	CCNC(=O)C[C@H]1C2=NN=C(N2C3=C(C=C(C=C3)OC)C(=N1)C4=CC=C(C=C4)Cl)C	25	423.904	3.65602	1	6	5	3	0.272727	53.5468	58.4419
I-BRD9	91668541	CCN1C=C(C2=C(C1=O)C=C(S2)C(=NC3CCS(=O)(=O)CC3)N)C4=CC(=CC=C4)C(F)(F)F	8	497.564	4.0512	1	6	4	3	0.363636	27.0162	44.8229
Ibrutinib	24821094	C=CC(=O)N1CCC[C@H](C1)N2C3=NC=NC(=C3C(=N2)C4=CC=C(C=C4)OC5=CC=CC=C5)N	14	440.507	4.2173	1	7	5	4	0.2	82.4293	74.6771
ICL-SIRT078	45168044	COC1=C(C2=CC=CC=C2C=C1)CN3C=NC4=C(C3=O)C5=C(S4)CC(CC5)NCC6=CN=CC=C6	3	482.609	4.7102	1	7	6	5	0.25	109.427	144.3
Ipatasertib	24788740	C[C@@H]1C[C@H](C2=C1C(=NC=N2)N3CCN(CC3)C(=O)[C@H](CNC(C)C)C4=CC=C(C=C4)Cl)O	20	458.006	3.101	2	6	6	2	0.541667	39.1935	154.705
Irinotecan	60838	CCC1=C2CN3C(=CC4=C(C3=O)COC(=O)[C@@]4(CC)O)C2=NC5=C1C=C(C=C5)OC(=O)N6CCC(CC6)N7CCCCC7	39	586.689	4.0911	1	9	4	3	0.515152	139.409	164.383
JQ1	46907787	CC1=C(SC2=C1C(=N[C@H](C3=NN=C(N32)C)CC(=O)OC(C)(C)C)C4=CC=C(C=C4)Cl)C	45	456.999	5.53136	0	7	3	3	0.391304	129.526	190.86
KU-55933	5278396	C1COCCN1C2=CC(=O)C=C(O2)C3=C4C(=CC=C3)SC5=CC=CC=C5S4	1	395.505	4.7592	0	6	2	3	0.190476	169.6	354.918
Lapatinib	208908	CS(=O)(=O)CCNCC1=CC=C(O1)C2=CC3=C(C=C2)N=CN=C3NC4=CC(=C(C=C4)OCC5=CC(=CC=C5)F)Cl	27	581.069	6.1391	2	8	11	5	0.172414	259.31	583.324
LCL161	24737642	C[C@@H](C(=O)N[C@@H](C1CCCCC1)C(=O)N2CCC[C@H]2C3=NC(=CS3)C(=O)C4=CC=C(C=C4)F)NC	3	500.64	3.8497	2	6	8	2	0.538462	144.253	89.3021
Leflunomide	3899	CC1=C(C=NO1)C(=O)NC2=CC=C(C=C2)C(F)(F)F	28	270.21	3.25412	1	3	2	2	0.166667	39.0925	42.0736
LGK974	46926973	CC1=CC(=CN=C1C2=CC(=NC=C2)C)CC(=O)NC3=NC=C(C=C3)C4=NC=CN=C4	3	396.454	3.79364	1	6	5	4	0.130435	26.1567	73.2796
Linsitinib	11640390	CC1(CC(C1)C2=NC(=C3N2C=CN=C3N)C4=CC5=C(C=C4)C=CC(=N5)C6=CC=CC=C6)O	3	421.504	4.8221	2	6	3	5	0.192308	112.21	104.308
LJI308	118704762	C1COCCN1C2=CC=C(C=C2)C3=C(C=NC=C3)C4=CC(=C(C(=C4)F)O)F	2	368.383	4.236	1	4	3	3	0.190476	81.11	55.5022
LMP744	397888	COC1=C(C=C2C(=C1)C3=C(C4=CC5=C(C=C4C3=O)OCO5)N(C2=O)CCCNCCO)OC	58	452.463	1.9308	2	9	8	3	0.333333	102.701	126.135
Luminespib	135539077	CCNC(=O)C1=NOC(=C1C2=CC=C(C=C2)CN3CCOCC3)C4=CC(=C(C=C4O)O)C(C)C	84	465.55	4.1251	3	7	7	3	0.384615	124.655	97.4428
LY2109761	11655119	C1CC2=C(C(=NN2C1)C3=CC=CC=N3)C4=C5C=CC(=CC5=NC=C4)OCCN6CCOCC6	2	441.535	3.8175	0	7	6	4	0.346154	50.2	60.4773
Methotrexate	126941	CN(CC1=CN=C2C(=N1)C(=NC(=N2)N)N)C3=CC=C(C=C3)C(=O)N[C@@H](CCC(=O)O)C(=O)O	46	454.447	0.2684	5	10	9	3	0.25	142.275	131.225
MIM1	135691163	CC1=CSC(=NC2CCCCC2)N1/N=C/C3=C(C(=C(C=C3)O)O)O	5	347.44	3.09042	3	7	3	2	0.411765	27.078	17.4827
MIRA-1	227681	CCC(=O)OCN1C(=O)C=CC1=O	2	183.163	-0.1779	0	4	3	0	0.375	6.225	4.02965
Mirin	1206243	C1=CC(=CC=C1/C=C\2/C(=O)N=C(S2)N)O	38	220.253	1.3212	2	4	1	1	0	39.6776	56.3445
Mitoxantrone	4212	C1=CC(=C2C(=C1NCCNCCO)C(=O)C3=C(C=CC(=C3C2=O)O)O)NCCNCCO	50	444.488	-0.1392	8	10	12	2	0.363636	147.646	251.622
MK-1775	24856436	CC(C)(C1=NC(=CC=C1)N2C3=NC(=NC=C3C(=O)N2CC=C)NC4=CC=C(C=C4)N5CCN(CC5)C)O	92	500.607	2.886	2	10	7	4	0.333333	81.212	72.234
MK-8776	16224745	CN1C=C(C=N1)C2=C3N=C(C(=C(N3N=C2)N)Br)C4CCCNC4	15	376.262	1.9415	2	7	2	3	0.4	48.128	65.3219
ML323	60167849	CC1=CN=C(N=C1NCC2=CC=C(C=C2)N3C=CN=N3)C4=CC=CC=C4C(C)C	6	384.487	4.76822	1	6	6	4	0.217391	55.675	31.4834
MN-64	2802462	CC(C)C1=CC=C(C=C1)C2=CC(=O)C3=CC=CC=C3O2	1	264.324	4.5834	0	2	2	3	0.166667	30.51	19.9474
Mycophenolic acid	446541	CC1=C2COC(=O)C2=C(C(=C1OC)C/C=C(\C)/CCC(=O)O)O	45	320.341	2.73322	2	5	6	1	0.411765	67.6884	55.211
Nilotinib	644241	CC1=C(C=C(C=C1)C(=O)NC2=CC(=CC(=C2)C(F)(F)F)N3C=C(N=C3)C)NC4=NC=CC(=N4)C5=CN=CC=C5	18	529.526	6.35584	2	7	6	5	0.107143	2603.71	1407.42
Niraparib	24958200	C1C[C@H](CNC1)C2=CC=C(C=C2)N3C=C4C=CC=C(C4=N3)C(=O)N	12	320.396	2.5914	2	4	3	3	0.263158	47.2658	56.5166
NU7441	11327430	C1COCCN1C2=CC(=O)C3=C(O2)C(=CC=C3)C4=CC=CC5=C4SC6=CC=CC=C56	33	413.498	5.6645	0	5	2	5	0.16	39.4539	43.8589
Nutlin-3a (-)	11433190	CC(C)OC1=C(C=CC(=C1)OC)C2=N[C@H]([C@H](N2C(=O)N3CCNC(=O)C3)C4=CC=C(C=C4)Cl)C5=CC=C(C=C5)Cl	10	581.5	5.8858	1	5	6	3	0.3	42.389	32.1557
NVP-ADW742	9825149	C1CCN(C1)CC2CC(C2)N3C=C(C4=C(N=CN=C43)N)C5=CC(=CC=C5)OCC6=CC=CC=C6	38	453.59	5.3064	1	6	7	4	0.357143	90.3842	73.9167
Obatoclax Mesylate	16681698	CC1=CC(=C(N1)/C=C\2/C(=C/C(=C/3\C=C4C=CC=CC4=N3)/N2)OC)C.CS(=O)(=O)O	76	413.499	0.52314	3	4	2	3	0.190476	78.8091	93.6809
OF-1	35397514	CC1=C(C=CC(=C1)Br)S(=O)(=O)NC2=CC3=C(C=C2OC)N(C(=O)N3C)C	1	440.319	2.75732	1	6	4	3	0.235294	66.49	165.505
Olaparib	23725625	C1CC1C(=O)N2CCN(CC2)C(=O)C3=C(C=CC(=C3)CC4=NNC(=O)C5=CC=CC=C54)F	3	434.471	2.3474	1	4	4	3	0.333333	65.6633	100.643
Osimertinib	71496458	CN1C=C(C2=CC=CC=C21)C3=NC(=NC=C3)NC4=C(C=C(C(=C4)NC(=O)C=C)N(C)CCN(C)C)OC	12	499.619	4.5098	2	8	10	4	0.25	196.032	264.194
OTX015	9936746	CC1=C(SC2=C1C(=N[C@H](C3=NN=C(N32)C)CC(=O)NC4=CC=C(C=C4)O)C5=CC=C(C=C5)Cl)C	46	492.004	5.53396	2	7	4	4	0.2	63.0448	118.256
P22077	46931953	CC(=O)C1=CC(=C(S1)SC2=C(C=C(C=C2)F)F)[N+](=O)[O-]	9	315.322	4.2883	0	5	4	2	0.0833333	26.0989	30.5523
Palbociclib	5330286	CC1=C(C(=O)N(C2=NC(=NC=C12)NC3=NC=C(C=C3)N4CCNCC4)C5CCCC5)C(=O)C	22	447.543	2.96582	2	9	5	3	0.458333	55.2618	61.213
PCI-34051	24753719	COC1=CC=C(C=C1)CN2C=CC3=C2C=C(C=C3)C(=O)NO	4	296.326	2.8172	2	4	4	3	0.117647	24.76	25.2252
PD0325901	9826528	C1=CC(=C(C=C1I)F)NC2=C(C=CC(=C2F)F)C(=O)NOC[C@@H](CO)O	35	482.196	2.4667	4	5	7	2	0.1875	106.019	320.572
PD173074	1401	CCN(CC)CCCCNC1=NC2=NC(=C(C=C2C=N1)C3=CC(=CC(=C3)OC)OC)NC(=O)NC(C)(C)C	13	523.682	5.1629	3	8	12	3	0.5	84.17	125.696
Pevonedistat	16720766	C1CC2=CC=CC=C2[C@H]1NC3=C4C=CN(C4=NC=N3)[C@@H]5C[C@H]([C@H](C5)O)COS(=O)(=O)N	72	443.529	2.0628	3	8	6	3	0.428571	264.424	136.848
PF-4708671	51371303	CCC1=CN=CN=C1N2CCN(CC2)CC3=NC4=C(N3)C=C(C=C4)C(F)(F)F	3	390.413	3.2563	1	5	4	3	0.421053	143.627	105.063
PFI-1	71271629	CN1CC2=C(C=CC(=C2)NS(=O)(=O)C3=CC=CC=C3OC)NC1=O	5	347.396	2.4733	2	4	4	2	0.1875	43.672	25.3664
Pictilisib	17755052	CS(=O)(=O)N1CCN(CC1)CC2=CC3=C(S2)C(=NC(=N3)C4=C5C=NNC5=CC=C4)N6CCOCC6	84	513.649	2.1484	1	9	5	4	0.434783	78.9548	100.767
Piperlongumine	637858	COC1=CC(=CC(=C1OC)OC)/C=C/C(=O)N2CCC=CC2=O	10	317.341	2.0407	0	5	5	1	0.294118	43.712	28.2697
PLX-4720	24180719	CCCS(=O)(=O)NC1=C(C(=C(C=C1)F)C(=O)C2=CNC3=C2C=C(C=N3)Cl)F	9	413.833	3.8772	2	4	6	3	0.176471	41.3778	272.922
Podophyllotoxin bromide	234820	COC1=CC(=CC(=C1OC)OC)[C@H]2[C@@H]3[C@H](COC3=O)C(C4=CC5=C(C=C24)OCO5)Br	50	477.307	3.8118	0	7	4	2	0.409091	76.7556	96.6466
POMHEX	122540908	CC(C)(C)C(=O)OCOP(=O)(C1CCCN(C1=O)O)OCOC(=O)C(C)(C)C	55	423.399	2.6865	1	9	7	0	0.823529	60.4422	63.6615
PRIMA-1MET	52918385	COCC1(C(=O)C2CCN1CC2)CO	35	199.25	-0.3414	1	4	3	0	0.9	88.2506	79.1689
PRT062607	44462758	C1CC[C@H]([C@H](C1)N)NC2=NC=C(C(=N2)NC3=CC(=CC=C3)N4N=CC=N4)C(=O)N	31	393.455	1.5816	4	9	6	3	0.315789	70.2761	62.089
Pyridostatin	25227847	C1=CC=C2C(=C1)C(=CC(=N2)NC(=O)C3=CC(=CC(=N3)C(=O)NC4=NC5=CC=CC=C5C(=C4)OCCN)OCCN)OCCN	15	596.648	2.6951	5	11	13	5	0.193548	74.3833	57.7388
Refametinib	44182295	COC1=CC(=C(C(=C1NS(=O)(=O)C2(CC2)C[C@@H](CO)O)NC3=C(C=C(C=C3)I)F)F)F	45	572.343	3.4783	4	6	9	2	0.368421	112.09	148.732
Remodelin	44442376	C1CCC(=NNC2=NC(=CS2)C3=CC=C(C=C3)C#N)C1	7	282.372	4.02368	1	5	3	2	0.266667	30.56	37.6059
Ribociclib	44631912	CN(C)C(=O)C1=CC2=CN=C(N=C2N1C3CCCC3)NC4=NC=C(C=C4)N5CCNCC5	6	434.548	2.7964	2	8	5	3	0.478261	84.49	60.5306
RO-3306	135400873	C1=CC2=C(C=CC(=C2)/C=C\3/C(=O)NC(=NCC4=CC=CS4)S3)N=C1	20	351.456	4.0564	1	5	3	3	0.0555556	58.5985	53.0085
Romidepsin	5352062	C/C=C\1/C(=O)N[C@H](C(=O)O[C@H]\2CC(=O)N[C@@H](C(=O)N[C@H](CSSCC/C=C2)C(=O)N1)C(C)C)C(C)C	64	540.708	1.4296	4	8	2	0	0.625	72.6098	98.8542
Ruxolitinib	25126798	C1CCC(C1)[C@@H](CC#N)N2C=C(C=N2)C3=C4C=CNC4=NC=N3	4	306.373	3.46638	1	5	4	3	0.411765	646.768	597.525
RVX-208	135564749	CC1=CC(=CC(=C1OCCO)C)C2=NC3=C(C(=CC(=C3)OC)OC)C(=O)N2	1	370.405	2.59524	2	6	6	3	0.3	30.8	32.829
Sapitinib	11488320	CNC(=O)CN1CCC(CC1)OC2=C(C=C3C(=C2)C(=NC=N3)NC4=C(C(=CC=C4)Cl)F)OC	17	473.936	3.7637	2	7	7	3	0.347826	176.681	216.466
Savolitinib	68289010	C[C@@H](C1=CN2C=CN=C2C=C1)N3C4=NC(=CN=C4N=N3)C5=CN(N=C5)C	1	345.37	1.8788	0	9	3	5	0.176471	90.66	98.6371
SB505124	9858940	CC1=NC(=CC=C1)C2=C(N=C(N2)C(C)(C)C)C3=CC4=C(C=C3)OCO4	5	335.407	4.47332	1	4	2	3	0.3	245.972	580.817
SB590885	135421339	CN(C)CCOC1=CC=C(C=C1)C2=NC(=C(N2)C3=CC=NC=C3)C4=CC5=C(C=C4)/C(=N/O)/CC5	7	453.546	4.8706	2	6	7	4	0.222222	24.33	44.3664
SCH772984	24866313	C1CN(C[C@@H]1C(=O)NC2=CC3=C(C=C2)NN=C3C4=CC=NC=C4)CC(=O)N5CCN(CC5)C6=CC=C(C=C6)C7=NC=CC=N7	50	587.688	3.6911	2	8	7	5	0.272727	147.141	199.505
Schweinfurthin A	643462	CC(=CCC/C(=C/CC1=C(C=C(C=C1O)/C=C/C2=CC3=C(C(=C2)O)O[C@@]4(C[C@H]([C@H](C([C@H]4C3)(C)C)O)O)C)O)/C)C	20	548.72	6.6705	5	6	7	2	0.470588	59.918	60.0041
Selumetinib	10127622	CN1C=NC2=C1C=C(C(=C2F)NC3=C(C=C(C=C3)Br)Cl)C(=O)NOCCO	41	457.687	3.5256	3	6	6	3	0.176471	60.2966	225.763
Serdemetan	11609586	C1=CC=C2C(=C1)C(=CN2)CCNC3=CC=C(C=C3)NC4=CC=NC=C4	11	328.419	4.9611	3	3	6	4	0.0952381	49.1509	41.1068
Sinularin	5477029	C/C/1=C\CCC(C2CC(CCC3(C(O3)CC1)C)C(=C)C(=O)O2)(C)O	1	334.456	3.6833	1	4	0	0	0.75	33.98	61.2924
SN-38	104842	CCC1=C2CN3C(=CC4=C(C3=O)COC(=O)[C@@]4(CC)O)C2=NC5=C1C=C(C=C5)O	74	392.411	2.3476	2	7	2	3	0.318182	191.21	124.832
Sorafenib	216239	CNC(=O)C1=NC=CC(=C1)OC2=CC=C(C=C2)NC(=O)NC3=CC(=C(C=C3)Cl)C(F)(F)F	51	464.831	5.5497	3	4	5	3	0.0952381	31.4088	36.1472
Staurosporine	44259	C[C@@]12[C@@H]([C@@H](C[C@@H](O1)N3C4=CC=CC=C4C5=C6C(=C7C8=CC=CC=C8N2C7=C53)CNC6=O)NC)OC	100	466.541	4.354	2	6	2	5	0.321429	237.842	139.469
Talazoparib	135565082	CN1C(=NC=N1)[C@@H]2[C@H](NC3=CC(=CC4=C3C2=NNC4=O)F)C5=CC=C(C=C5)F	41	380.358	2.6285	2	6	2	4	0.157895	136.398	221.751
Tamoxifen	2733526	CC/C(=C(\C1=CC=CC=C1)/C2=CC=C(C=C2)OCCN(C)C)/C3=CC=CC=C3	5	371.524	5.9961	0	2	8	3	0.230769	23.67	27.5517
Tanespimycin	6505803	C[C@H]1C[C@@H]([C@@H]([C@H](/C=C(/[C@@H]([C@H](/C=C\C=C(\C(=O)NC2=CC(=O)C(=C(C1)C2=O)NCC=C)/C)OC)OC(=O)N)\C)C)O)OC	51	585.698	2.5376	4	9	6	0	0.483871	75.7306	98.505
Taselisib	51001932	CC1=NN(C(=N1)C2=CN3CCOC4=C(C3=N2)C=CC(=C4)C5=CN(N=C5)C(C)(C)C(=O)N)C(C)C	49	460.542	3.17422	1	9	5	4	0.375	130.35	228.687
Telomerase Inhibitor IX	10385095	C1=CC(=CC(=C1)NC(=O)C2=C(C(=CC=C2)O)O)NC(=O)C3=C(C(=CC=C3)O)O	86	380.356	3.0136	6	6	4	3	0	67.126	57.204
Temozolomide	5394	CN1C(=O)N2C=NC(=C2N=N1)C(=O)N	2	194.154	-2.0781	1	7	1	2	0.166667	7.18	36.3548
Teniposide	452548	COC1=CC(=CC(=C1O)OC)[C@H]2[C@@H]3[C@H](COC3=O)[C@@H](C4=CC5=C(C=C24)OCO5)O[C@H]6[C@@H]([C@H]([C@H]7[C@H](O6)CO[C@H](O7)C8=CC=CS8)O)O	44	656.662	2.7529	3	14	6	3	0.46875	68.3011	141.157
Topotecan	60700	CC[C@@]1(C2=C(COC1=O)C(=O)N3CC4=CC5=C(C=CC(=C5CN(C)C)O)N=C4C3=C2)O	48	421.453	1.8468	2	8	3	3	0.347826	103.285	96.713
Tozasertib	5494449	CC1=CC(=NN1)NC2=CC(=NC(=N2)SC3=CC=C(C=C3)NC(=O)C4CC4)N5CCN(CC5)C	11	464.599	3.50322	3	8	7	3	0.391304	141.15	324.403
Trametinib	11707110	CC1=C2C(=C(N(C1=O)C)NC3=C(C=C(C=C3)I)F)C(=O)N(C(=O)N2C4=CC=CC(=C4)NC(=O)C)C5CC5	41	615.403	3.94012	2	8	5	4	0.230769	146.912	266.447
TW 37	11455910	CC(C)C1=CC=CC=C1CC2=CC(=C(C(=C2O)O)O)C(=O)NC3=CC=C(C=C3)S(=O)(=O)C4=CC=CC=C4C(C)(C)C	15	573.711	6.9002	4	6	7	4	0.242424	47.7847	48.5613
Ulixertinib	11719003	CC(C)NC1=NC=C(C(=C1)C2=CNC(=C2)C(=O)N[C@H](CO)C3=CC(=CC=C3)Cl)Cl	50	433.339	4.6672	4	4	7	3	0.238095	119.684	150.908
UMI-77	992586	C1=CC=C2C(=C1)C(=CC(=C2O)SCC(=O)O)NS(=O)(=O)C3=CC=C(C=C3)Br	34	468.35	4.2854	3	5	6	3	0.0555556	36.3191	42.0167
UNC0379	78357767	COC1=C(C=C2C(=C1)C(=NC(=N2)N3CCCC3)NCCCCCN4CCCC4)OC	20	413.566	3.9252	1	7	10	2	0.652174	34.503	33.212
Uprosertib	51042438	CN1C(=C(C=N1)Cl)C2=C(OC(=C2)C(=O)N[C@@H](CC3=CC(=C(C=C3)F)F)CN)Cl	65	429.254	3.5649	2	5	6	3	0.222222	82.92	198.49
VE821	51000408	CS(=O)(=O)C1=CC=C(C=C1)C2=CN=C(C(=N2)C(=O)NC3=CC=CC=C3)N	17	368.418	2.3816	2	6	4	3	0.0555556	30.4418	91.0542
VE-822	59472121	CC(C)S(=O)(=O)C1=CC=C(C=C1)C2=CN=C(C(=N2)C3=CC(=NO3)C4=CC=C(C=C4)CNC)N	13	463.563	3.9493	2	8	7	4	0.208333	68.2746	39.7325
Vismodegib	24776445	CS(=O)(=O)C1=CC(=C(C=C1)C(=O)NC2=CC(=C(C=C2)Cl)C3=CC=CC=N3)Cl	1	421.305	4.7112	1	4	4	3	0.0526316	63.63	53.9436
Vorinostat	5311	C1=CC=C(C=C1)NC(=O)CCCCCCC(=O)NO	62	264.325	2.4711	3	3	8	1	0.428571	45.1448	52.3123
VX-11e	11634725	CC1=CN=C(N=C1C2=CNC(=C2)C(=O)N[C@H](CO)C3=CC(=CC=C3)Cl)NC4=C(C=C(C=C4)F)Cl	33	500.361	5.43302	4	5	7	4	0.125	100.813	165.909
Wee1 Inhibitor	10384072	C1=CC=C(C(=C1)C2=CC3=C(C4=C(N3)C=CC(=C4)O)C5=C2C(=O)NC5=O)Cl	60	362.772	4.2307	3	3	1	4	0	79.8303	70.2548
WEHI-539	71297207	C1CC2=C(C=C(C=C2)C3=NC(=C(S3)CCCOC4=CC=C(C=C4)CN)C(=O)O)/C(=N/NC5=NC6=CC=CC=C6S5)/C1	14	583.739	6.7408	3	9	10	5	0.225806	156.65	160.869
WIKI4	2984337	COC1=CC=C(C=C1)N2C(=NN=C2SCCCN3C(=O)C4=CC=CC5=C4C(=CC=C5)C3=O)C6=CC=NC=C6	1	521.602	5.2695	0	8	8	5	0.137931	60.74	31.055
Wnt-C59	57519544	CC1=NC=CC(=C1)C2=CC=C(C=C2)CC(=O)NC3=CC=C(C=C3)C4=CN=CC=C4	3	379.463	5.30022	1	3	5	4	0.08	32.4967	7.10894
WZ4003	72200024	CCC(=O)NC1=CC(=CC=C1)OC2=NC(=NC=C2Cl)NC3=C(C=C(C=C3)N4CCN(CC4)C)OC	14	496.999	4.7748	2	8	8	3	0.32	21.3086	36.4877
XAV939	135418940	C1CSCC2=C1N=C(NC2=O)C3=CC=C(C=C3)C(F)(F)F	1	312.316	3.245	1	3	1	2	0.285714	37.3	45.7861
YK-4-279	44632017	COC1=CC=C(C=C1)C(=O)CC2(C3=C(C=CC(=C3NC2=O)Cl)Cl)O	66	366.2	3.4147	2	4	4	2	0.176471	57.0608	55.2247
ZM447439	9914412	COC1=C(C=C2C(=C1)C(=NC=N2)NC3=CC=C(C=C3)NC(=O)C4=CC=CC=C4)OCCCN5CCOCC5	56	513.598	4.7354	2	8	10	4	0.275862	65.9557	65.3782

## Sheet: TargetPath_vs_PredAccuracy
Model	drug	Count		Drugwise MAPE IC50	Target pathway
DeepCDR	Afatinib	74	106178	1434.84	EGFR signaling
DeepCDR	Afuresertib	42	2556.72	60.8743	PI3K/MTOR signaling
DeepCDR	AGI-6780	4	106.23	26.5575	Metabolism
DeepCDR	AGK2	2	19.74	9.87	Chromatin histone acetylation
DeepCDR	Alisertib	55	9381.06	170.565	Mitosis
DeepCDR	Alpelisib	18	2318.72	128.818	PI3K/MTOR signaling
DeepCDR	AMG-319	2	67.24	33.62	PI3K/MTOR signaling
DeepCDR	AT13148	22	1407.62	63.9827	PI3K/MTOR signaling
DeepCDR	Axitinib	26	3491.71	134.297	RTK signaling
DeepCDR	AZ6102	52	2209.09	42.4825	WNT signaling
DeepCDR	AZD1332	9	715.78	79.5311	RTK signaling
DeepCDR	AZD2014	44	4352.19	98.9134	PI3K/MTOR signaling
DeepCDR	AZD3759	2	336.37	168.185	EGFR signaling
DeepCDR	AZD4547	28	2348.82	83.8864	RTK signaling
DeepCDR	AZD5153	55	4504.26	81.8956	Chromatin other
DeepCDR	AZD5438	40	2361.37	59.0343	Cell cycle
DeepCDR	AZD5991	23	12601.8	547.903	Apoptosis regulation
DeepCDR	AZD6482	5	194.82	38.964	PI3K/MTOR signaling
DeepCDR	AZD6738	53	2618.65	49.4085	Genome integrity
DeepCDR	AZD7762	96	16698.3	173.941	Cell cycle
DeepCDR	AZD8055	61	5948.2	97.5115	PI3K/MTOR signaling
DeepCDR	AZD8186	22	1001.38	45.5173	PI3K/MTOR signaling
DeepCDR	BI-2536	90	48554.4	539.493	Cell cycle
DeepCDR	BMS-536924	54	5594.27	103.598	IGF1R signaling
DeepCDR	BMS-754807	35	10975.4	313.583	RTK signaling
DeepCDR	Bromosporine	9	288.78	32.0867	Chromatin other
DeepCDR	Buparlisib	73	3056.89	41.8752	PI3K/MTOR signaling
DeepCDR	Camptothecin	54	6380.7	118.161	DNA replication
DeepCDR	CCT-018159	2	135.22	67.61	Protein stability and degradation
DeepCDR	Cediranib	41	1999.82	48.7761	RTK signaling
DeepCDR	CHIR-99021	5	301.37	60.274	WNT signaling
DeepCDR	Crizotinib	27	1959.87	72.5878	RTK signaling
DeepCDR	Dabrafenib	12	854.5	71.2083	ERK MAPK signaling
DeepCDR	Dactolisib	54	3423.32	63.3948	PI3K/MTOR signaling
DeepCDR	Daporinad	46	10262.4	223.096	Metabolism
DeepCDR	Dasatinib	31	52947.3	1707.98	RTK signaling
DeepCDR	Dinaciclib	74	12165.6	164.399	Cell cycle
DeepCDR	Elesclomol	9	2736.88	304.098	Protein stability and degradation
DeepCDR	Entinostat	50	3569	71.38	Chromatin histone acetylation
DeepCDR	Epirubicin	82	8758.12	106.806	DNA replication
DeepCDR	Erlotinib	36	2523.62	70.1006	EGFR signaling
DeepCDR	Fludarabine	12	4971.77	414.314	DNA replication
DeepCDR	Foretinib	103	11115.7	107.919	RTK signaling
DeepCDR	Fulvestrant	1	51.76	51.76	Hormone-related
DeepCDR	Gefitinib	3	93.69	31.23	EGFR signaling
DeepCDR	Gemcitabine	92	21998.3	239.113	DNA replication
DeepCDR	GNE-317	68	4720.72	69.4224	PI3K/MTOR signaling
DeepCDR	GSK2606414	9	330.16	36.6844	Metabolism
DeepCDR	GSK343	7	310	44.2857	Chromatin histone methylation
DeepCDR	I-BET-762	25	1338.67	53.5468	Chromatin other
DeepCDR	I-BRD9	8	216.13	27.0162	Chromatin other
DeepCDR	Ipatasertib	20	783.87	39.1935	PI3K/MTOR signaling
DeepCDR	Irinotecan	39	5436.96	139.409	DNA replication
DeepCDR	JQ1	45	5828.66	129.526	Chromatin other
DeepCDR	KU-55933	1	169.6	169.6	Genome integrity
DeepCDR	Lapatinib	27	7001.38	259.31	RTK signaling
DeepCDR	LCL161	3	432.76	144.253	Apoptosis regulation
DeepCDR	Leflunomide	28	1094.59	39.0925	DNA replication
DeepCDR	LGK974	3	78.47	26.1567	WNT signaling
DeepCDR	Linsitinib	3	336.63	112.21	IGF1R signaling
DeepCDR	LJI308	2	162.22	81.11	PI3K/MTOR signaling
DeepCDR	LMP744	58	5956.65	102.701	DNA replication
DeepCDR	Luminespib	84	10471	124.655	Protein stability and degradation
DeepCDR	Methotrexate	46	6544.66	142.275	DNA replication
DeepCDR	MIM1	5	135.39	27.078	Apoptosis regulation
DeepCDR	MIRA-1	2	12.45	6.225	p53 pathway
DeepCDR	Mirin	38	1507.75	39.6776	Genome integrity
DeepCDR	Mitoxantrone	50	7382.28	147.646	DNA replication
DeepCDR	MK-1775	92	7471.5	81.212	Cell cycle
DeepCDR	MK-8776	15	721.92	48.128	Cell cycle
DeepCDR	ML323	6	334.05	55.675	Protein stability and degradation
DeepCDR	MN-64	1	30.51	30.51	WNT signaling
DeepCDR	Niraparib	12	567.19	47.2658	Genome integrity
DeepCDR	NU7441	33	1301.98	39.4539	Genome integrity
DeepCDR	Nutlin-3a (-)	10	423.89	42.389	p53 pathway
DeepCDR	NVP-ADW742	38	3434.6	90.3842	IGF1R signaling
DeepCDR	Obatoclax Mesylate	76	5989.49	78.8091	Apoptosis regulation
DeepCDR	OF-1	1	66.49	66.49	Chromatin histone acetylation
DeepCDR	Olaparib	3	196.99	65.6633	Genome integrity
DeepCDR	Osimertinib	12	2352.39	196.032	EGFR signaling
DeepCDR	OTX015	46	2900.06	63.0448	Chromatin other
DeepCDR	P22077	9	234.89	26.0989	Protein stability and degradation
DeepCDR	Palbociclib	22	1215.76	55.2618	Cell cycle
DeepCDR	PCI-34051	4	99.04	24.76	Chromatin histone acetylation
DeepCDR	PD0325901	35	3710.66	106.019	ERK MAPK signaling
DeepCDR	PD173074	13	1094.21	84.17	RTK signaling
DeepCDR	PF-4708671	3	430.88	143.627	PI3K/MTOR signaling
DeepCDR	PFI-1	5	218.36	43.672	Chromatin other
DeepCDR	Pictilisib	84	6632.2	78.9548	PI3K/MTOR signaling
DeepCDR	PLX-4720	9	372.4	41.3778	ERK MAPK signaling
DeepCDR	PRIMA-1MET	35	3088.77	88.2506	p53 pathway
DeepCDR	Pyridostatin	15	1115.75	74.3833	DNA replication
DeepCDR	Refametinib	45	5044.06	112.09	ERK MAPK signaling
DeepCDR	Ribociclib	6	506.94	84.49	Cell cycle
DeepCDR	RO-3306	20	1171.97	58.5985	Cell cycle
DeepCDR	Romidepsin	64	4647.03	72.6098	Chromatin histone acetylation
DeepCDR	RVX-208	1	30.8	30.8	Chromatin other
DeepCDR	Sapitinib	17	3003.58	176.681	EGFR signaling
DeepCDR	Savolitinib	1	90.66	90.66	RTK signaling
DeepCDR	SB505124	5	1229.86	245.972	RTK signaling
DeepCDR	SB590885	7	170.31	24.33	ERK MAPK signaling
DeepCDR	SCH772984	50	7357.05	147.141	ERK MAPK signaling
DeepCDR	Selumetinib	41	2472.16	60.2966	ERK MAPK signaling
DeepCDR	Serdemetan	11	540.66	49.1509	p53 pathway
DeepCDR	SN-38	74	14149.6	191.21	DNA replication
DeepCDR	Sorafenib	51	1601.85	31.4088	RTK signaling
DeepCDR	Staurosporine	100	23784.2	237.842	RTK signaling
DeepCDR	Talazoparib	41	5592.33	136.398	Genome integrity
DeepCDR	Tamoxifen	5	118.35	23.67	Hormone-related
DeepCDR	Tanespimycin	51	3862.26	75.7306	Protein stability and degradation
DeepCDR	Taselisib	49	6387.16	130.35	PI3K/MTOR signaling
DeepCDR	Telomerase Inhibitor IX	86	5772.84	67.126	Genome integrity
DeepCDR	Temozolomide	2	14.36	7.18	DNA replication
DeepCDR	Teniposide	44	3005.25	68.3011	DNA replication
DeepCDR	Topotecan	48	4957.7	103.285	DNA replication
DeepCDR	Tozasertib	11	1552.65	141.15	Mitosis
DeepCDR	Trametinib	41	6023.41	146.912	ERK MAPK signaling
DeepCDR	TW 37	15	716.77	47.7847	Apoptosis regulation
DeepCDR	Ulixertinib	50	5984.19	119.684	ERK MAPK signaling
DeepCDR	UMI-77	34	1234.85	36.3191	Apoptosis regulation
DeepCDR	UNC0379	20	690.06	34.503	Chromatin histone methylation
DeepCDR	Uprosertib	65	5389.8	82.92	PI3K/MTOR signaling
DeepCDR	VE821	17	517.51	30.4418	Genome integrity
DeepCDR	VE-822	13	887.57	68.2746	Genome integrity
DeepCDR	Vorinostat	62	2798.98	45.1448	Chromatin histone acetylation
DeepCDR	VX-11e	33	3326.84	100.813	ERK MAPK signaling
DeepCDR	Wee1 Inhibitor	60	4789.82	79.8303	Cell cycle
DeepCDR	WEHI-539	14	2193.1	156.65	Apoptosis regulation
DeepCDR	WIKI4	1	60.74	60.74	WNT signaling
DeepCDR	Wnt-C59	3	97.49	32.4967	WNT signaling
DeepCDR	XAV939	1	37.3	37.3	WNT signaling
DeepCDR	ZM447439	56	3693.52	65.9557	Mitosis
DrugCell	Afatinib	74	147808	1997.41	EGFR signaling
DrugCell	Afuresertib	42	10037.5	238.988	PI3K/MTOR signaling
DrugCell	AGI-6780	4	164.642	41.1605	Metabolism
DrugCell	AGK2	2	40.6327	20.3163	Chromatin histone acetylation
DrugCell	Alisertib	55	8760.81	159.287	Mitosis
DrugCell	Alpelisib	18	2822.22	156.79	PI3K/MTOR signaling
DrugCell	AMG-319	2	73.5946	36.7973	PI3K/MTOR signaling
DrugCell	AT13148	22	1768.35	80.3796	PI3K/MTOR signaling
DrugCell	Axitinib	26	3614.81	139.031	RTK signaling
DrugCell	AZ6102	52	2485.03	47.789	WNT signaling
DrugCell	AZD1332	9	2644.36	293.818	RTK signaling
DrugCell	AZD2014	44	4833.07	109.843	PI3K/MTOR signaling
DrugCell	AZD3759	2	748.313	374.157	EGFR signaling
DrugCell	AZD4547	28	1883.8	67.2785	RTK signaling
DrugCell	AZD5153	55	10782.5	196.045	Chromatin other
DrugCell	AZD5438	40	2334.29	58.3571	Cell cycle
DrugCell	AZD5991	23	10156.5	441.589	Apoptosis regulation
DrugCell	AZD6482	5	215.433	43.0865	PI3K/MTOR signaling
DrugCell	AZD6738	53	2957.57	55.8033	Genome integrity
DrugCell	AZD7762	96	15193.5	158.265	Cell cycle
DrugCell	AZD8055	61	7580.54	124.271	PI3K/MTOR signaling
DrugCell	AZD8186	22	1099.37	49.9712	PI3K/MTOR signaling
DrugCell	BI-2536	90	21820.9	242.454	Cell cycle
DrugCell	BMS-536924	54	6562.74	121.532	IGF1R signaling
DrugCell	BMS-754807	35	18442.7	526.934	RTK signaling
DrugCell	Bromosporine	9	286.932	31.8813	Chromatin other
DrugCell	Buparlisib	73	3666.02	50.2195	PI3K/MTOR signaling
DrugCell	Camptothecin	54	4057.99	75.1479	DNA replication
DrugCell	CCT-018159	2	159.599	79.7993	Protein stability and degradation
DrugCell	Cediranib	41	2182.48	53.2312	RTK signaling
DrugCell	CHIR-99021	5	153.518	30.7036	WNT signaling
DrugCell	Crizotinib	27	1850.64	68.5422	RTK signaling
DrugCell	Dabrafenib	12	10041.7	836.812	ERK MAPK signaling
DrugCell	Dactolisib	54	4224.84	78.2378	PI3K/MTOR signaling
DrugCell	Daporinad	46	10363.5	225.293	Metabolism
DrugCell	Dasatinib	31	99134	3197.87	RTK signaling
DrugCell	Dinaciclib	74	7446.01	100.622	Cell cycle
DrugCell	Elesclomol	9	1602.6	178.067	Protein stability and degradation
DrugCell	Entinostat	50	4534.27	90.6854	Chromatin histone acetylation
DrugCell	Epirubicin	82	8490.26	103.54	DNA replication
DrugCell	Erlotinib	36	2836.24	78.7844	EGFR signaling
DrugCell	Fludarabine	12	8460.08	705.007	DNA replication
DrugCell	Foretinib	103	9130.68	88.6473	RTK signaling
DrugCell	Fulvestrant	1	58.5115	58.5115	Hormone-related
DrugCell	Gefitinib	3	122.903	40.9677	EGFR signaling
DrugCell	Gemcitabine	92	23470.4	255.113	DNA replication
DrugCell	GNE-317	68	5984.37	88.0054	PI3K/MTOR signaling
DrugCell	GSK2606414	9	306.786	34.0873	Metabolism
DrugCell	GSK343	7	172.736	24.6766	Chromatin histone methylation
DrugCell	I-BET-762	25	1461.05	58.4419	Chromatin other
DrugCell	I-BRD9	8	358.583	44.8229	Chromatin other
DrugCell	Ipatasertib	20	3094.1	154.705	PI3K/MTOR signaling
DrugCell	Irinotecan	39	6410.95	164.383	DNA replication
DrugCell	JQ1	45	8588.72	190.86	Chromatin other
DrugCell	KU-55933	1	354.918	354.918	Genome integrity
DrugCell	Lapatinib	27	15749.7	583.324	RTK signaling
DrugCell	LCL161	3	267.906	89.3021	Apoptosis regulation
DrugCell	Leflunomide	28	1178.06	42.0736	DNA replication
DrugCell	LGK974	3	219.839	73.2796	WNT signaling
DrugCell	Linsitinib	3	312.925	104.308	IGF1R signaling
DrugCell	LJI308	2	111.004	55.5022	PI3K/MTOR signaling
DrugCell	LMP744	58	7315.86	126.135	DNA replication
DrugCell	Luminespib	84	8185.19	97.4428	Protein stability and degradation
DrugCell	Methotrexate	46	6036.36	131.225	DNA replication
DrugCell	MIM1	5	87.4136	17.4827	Apoptosis regulation
DrugCell	MIRA-1	2	8.05929	4.02965	p53 pathway
DrugCell	Mirin	38	2141.09	56.3445	Genome integrity
DrugCell	Mitoxantrone	50	12581.1	251.622	DNA replication
DrugCell	MK-1775	92	6645.53	72.234	Cell cycle
DrugCell	MK-8776	15	979.829	65.3219	Cell cycle
DrugCell	ML323	6	188.9	31.4834	Protein stability and degradation
DrugCell	MN-64	1	19.9474	19.9474	WNT signaling
DrugCell	Niraparib	12	678.199	56.5166	Genome integrity
DrugCell	NU7441	33	1447.34	43.8589	Genome integrity
DrugCell	Nutlin-3a (-)	10	321.557	32.1557	p53 pathway
DrugCell	NVP-ADW742	38	2808.84	73.9167	IGF1R signaling
DrugCell	Obatoclax Mesylate	76	7119.75	93.6809	Apoptosis regulation
DrugCell	OF-1	1	165.505	165.505	Chromatin histone acetylation
DrugCell	Olaparib	3	301.928	100.643	Genome integrity
DrugCell	Osimertinib	12	3170.33	264.194	EGFR signaling
DrugCell	OTX015	46	5439.78	118.256	Chromatin other
DrugCell	P22077	9	274.971	30.5523	Protein stability and degradation
DrugCell	Palbociclib	22	1346.69	61.213	Cell cycle
DrugCell	PCI-34051	4	100.901	25.2252	Chromatin histone acetylation
DrugCell	PD0325901	35	11220	320.572	ERK MAPK signaling
DrugCell	PD173074	13	1634.05	125.696	RTK signaling
DrugCell	PF-4708671	3	315.189	105.063	PI3K/MTOR signaling
DrugCell	PFI-1	5	126.832	25.3664	Chromatin other
DrugCell	Pictilisib	84	8464.43	100.767	PI3K/MTOR signaling
DrugCell	PLX-4720	9	2456.3	272.922	ERK MAPK signaling
DrugCell	PRIMA-1MET	35	2770.91	79.1689	p53 pathway
DrugCell	Pyridostatin	15	866.081	57.7388	DNA replication
DrugCell	Refametinib	45	6692.92	148.732	ERK MAPK signaling
DrugCell	Ribociclib	6	363.184	60.5306	Cell cycle
DrugCell	RO-3306	20	1060.17	53.0085	Cell cycle
DrugCell	Romidepsin	64	6326.67	98.8542	Chromatin histone acetylation
DrugCell	RVX-208	1	32.829	32.829	Chromatin other
DrugCell	Sapitinib	17	3679.93	216.466	EGFR signaling
DrugCell	Savolitinib	1	98.6371	98.6371	RTK signaling
DrugCell	SB505124	5	2904.09	580.817	RTK signaling
DrugCell	SB590885	7	310.565	44.3664	ERK MAPK signaling
DrugCell	SCH772984	50	9975.24	199.505	ERK MAPK signaling
DrugCell	Selumetinib	41	9256.28	225.763	ERK MAPK signaling
DrugCell	Serdemetan	11	452.175	41.1068	p53 pathway
DrugCell	SN-38	74	9237.57	124.832	DNA replication
DrugCell	Sorafenib	51	1843.51	36.1472	RTK signaling
DrugCell	Staurosporine	100	13946.9	139.469	RTK signaling
DrugCell	Talazoparib	41	9091.8	221.751	Genome integrity
DrugCell	Tamoxifen	5	137.759	27.5517	Hormone-related
DrugCell	Tanespimycin	51	5023.76	98.505	Protein stability and degradation
DrugCell	Taselisib	49	11205.7	228.687	PI3K/MTOR signaling
DrugCell	Telomerase Inhibitor IX	86	4919.55	57.204	Genome integrity
DrugCell	Temozolomide	2	72.7096	36.3548	DNA replication
DrugCell	Teniposide	44	6210.89	141.157	DNA replication
DrugCell	Topotecan	48	4642.23	96.713	DNA replication
DrugCell	Tozasertib	11	3568.44	324.403	Mitosis
DrugCell	Trametinib	41	10924.3	266.447	ERK MAPK signaling
DrugCell	TW 37	15	728.42	48.5613	Apoptosis regulation
DrugCell	Ulixertinib	50	7545.41	150.908	ERK MAPK signaling
DrugCell	UMI-77	34	1428.57	42.0167	Apoptosis regulation
DrugCell	UNC0379	20	664.239	33.212	Chromatin histone methylation
DrugCell	Uprosertib	65	12901.8	198.49	PI3K/MTOR signaling
DrugCell	VE-822	13	1183.7	91.0542	Genome integrity
DrugCell	VE821	17	675.453	39.7325	Genome integrity
DrugCell	Vorinostat	62	3243.36	52.3123	Chromatin histone acetylation
DrugCell	VX-11e	33	5474.99	165.909	ERK MAPK signaling
DrugCell	Wee1 Inhibitor	60	4215.29	70.2548	Cell cycle
DrugCell	WEHI-539	14	2252.17	160.869	Apoptosis regulation
DrugCell	WIKI4	1	31.055	31.055	WNT signaling
DrugCell	Wnt-C59	3	21.3268	7.10894	WNT signaling
DrugCell	XAV939	1	45.7861	45.7861	WNT signaling
DrugCell	ZM447439	56	3661.18	65.3782	Mitosis

## Sheet: CellLineTissue_vs_PredAccuracy
Model	Cell line	Count	Tissue type	Cellwise MAPE IC50
DeepCDR	A673	10	Soft Tissue	84.267
DeepCDR	SK-MM-2	5	Myeloma	77.4
DeepCDR	NCI-H23	8	Lung (NSCLC)	97.6813
DeepCDR	RPMI-8226	17	Myeloma	73.1071
DeepCDR	YH-13	10	Nervous System	67.438
DeepCDR	BL-41	21	Lymphoma	76.659
DeepCDR	AGS	16	Digestive System	85.3819
DeepCDR	ALL-SIL	15	Leukemia	87.9607
DeepCDR	EC-GI-10	18	Aerodigestive Tract	85.3772
DeepCDR	TE-15	10	Aerodigestive Tract	78.083
DeepCDR	HCT-116	19	Large Intestine	77.2216
DeepCDR	HCT-15	16	Large Intestine	100.435
DeepCDR	639-V	5	Urogenital System	127.092
DeepCDR	697	15	Leukemia	75.1447
DeepCDR	D-283MED	13	Nervous System	122.362
DeepCDR	HCC1569	8	Breast	41.8987
DeepCDR	HSC-3	10	Aerodigestive Tract	602.06
DeepCDR	NOMO-1	10	Leukemia	201.964
DeepCDR	WM-115	8	Skin	39.5862
DeepCDR	Jurkat	26	Leukemia	67.2515
DeepCDR	DND-41	21	Leukemia	255.714
DeepCDR	TE-4	12	Aerodigestive Tract	83.48
DeepCDR	HCC1954	9	Breast	82.06
DeepCDR	A498	5	Kidney	42.784
DeepCDR	MDA-MB-468	13	Breast	49.8815
DeepCDR	MES-SA	18	Urogenital System	62.8094
DeepCDR	NCI-H28	8	Lung	42.3975
DeepCDR	OS-RC-2	4	Kidney	15.2475
DeepCDR	MDA-MB-415	12	Breast	228.936
DeepCDR	NUGC-4	9	Digestive System	258.076
DeepCDR	COR-L105	8	Lung (NSCLC)	56.3888
DeepCDR	HCC70	9	Breast	59.6822
DeepCDR	KMS-12-BM	20	Myeloma	57.263
DeepCDR	MDA-MB-361	12	Breast	58.3475
DeepCDR	MEG-01	22	Leukemia	50.1864
DeepCDR	CW-2	10	Large Intestine	159.952
DeepCDR	IGR-37	9	Skin	61.3533
DeepCDR	EFM-192A	10	Breast	57.938
DeepCDR	NCI-H1781	8	Lung (NSCLC)	42.4375
DeepCDR	K-562	8	Leukemia	74.2163
DeepCDR	KYSE-510	9	Aerodigestive Tract	40.4322
DeepCDR	8-MG-BA	17	Nervous System	84.6912
DeepCDR	DMS-273	21	Lung (SCLC)	118.811
DeepCDR	NCI-H82	17	Lung (SCLC)	180.469
DeepCDR	SBC-5	10	Lung (SCLC)	63.783
DeepCDR	NCI-H2122	21	Lung (NSCLC)	127.488
DeepCDR	HCC2157	12	Breast	68.3833
DeepCDR	T47D	10	Breast	36.361
DeepCDR	KM12	14	Large Intestine	54.0571
DeepCDR	A2058	18	Skin	2730.28
DeepCDR	COLO-679	11	Skin	52.0436
DeepCDR	DB	12	Lymphoma	224.296
DeepCDR	DU-4475	22	Breast	94.3286
DeepCDR	FTC-133	9	Thyroid	181.371
DeepCDR	GI-1	12	Nervous System	61.0583
DeepCDR	ESS-1	19	Urogenital System	49.6563
DeepCDR	H4	15	Nervous System	48.598
DeepCDR	HT-144	15	Skin	194.654
DeepCDR	KP-N-YN	8	Neuroblastoma	46.1887
DeepCDR	MEL-JUSO	3	Skin	151.067
DeepCDR	MKN1	9	Digestive System	74.3211
DeepCDR	NAMALWA	20	Lymphoma	2379.78
DeepCDR	RS4-11	16	Leukemia	76.2775
DeepCDR	OE33	11	Aerodigestive Tract	92.1845
DeepCDR	A4-Fuk	24	Lymphoma	106.774
DeepCDR	CAS-1	10	Nervous System	28.736
DeepCDR	22RV1	10	Urogenital System	60.103
DeepCDR	L-363	8	Myeloma	44.1587
DeepCDR	SUP-B15	14	Leukemia	95.9393
DeepCDR	CAL-29	14	Urogenital System	48.0893
DeepCDR	HCC-78	18	Lung (NSCLC)	61.1589
DeepCDR	KMRC-20	7	Kidney	33.6843
DeepCDR	WM793B	13	Skin	139.213
DeepCDR	GA-10	18	Lymphoma	81.5278
DeepCDR	JURL-MK1	16	Leukemia	312.844
DeepCDR	KOPN-8	19	Leukemia	84.9147
DeepCDR	SNU-C5	12	Large Intestine	58.6542
DeepCDR	NCI-H1048	8	Lung (SCLC)	59.1
DeepCDR	NCI-H209	12	Lung (SCLC)	65.6258
DeepCDR	NCI-H446	15	Lung (SCLC)	78.622
DeepCDR	NCI-H929	22	Myeloma	150.215
DeepCDR	SK-N-AS	7	Neuroblastoma	369.476
DeepCDR	UM-UC-3	7	Urogenital System	97.0243
DeepCDR	HCC1187	9	Breast	65.7044
DeepCDR	CAL-33	10	Aerodigestive Tract	72.862
DeepCDR	EBC-1	12	Lung (NSCLC)	107.465
DeepCDR	LXF-289	13	Lung (NSCLC)	55.8177
DeepCDR	SK-MEL-2	9	Skin	104.854
DeepCDR	Hs-578-T	11	Breast	195.618
DeepCDR	SW620	12	Large Intestine	310.322
DeepCDR	BHT-101	13	Thyroid	55.6931
DeepCDR	CHP-212	21	Neuroblastoma	45.7576
DeepCDR	EM-2	19	Leukemia	62.8058
DeepCDR	KARPAS-422	19	Lymphoma	219.984
DeepCDR	NCI-H524	15	Lung (SCLC)	102.455
DeepCDR	Raji	18	Lymphoma	97.7106
DeepCDR	RKO	12	Large Intestine	256.225
DeepCDR	SH-4	7	Skin	88.0814
DeepCDR	SK-MES-1	10	Lung (NSCLC)	49.882
DeepCDR	SNG-M	13	Urogenital System	195.478
DeepCDR	SW1463	7	Large Intestine	42.1429
DeepCDR	SW948	13	Large Intestine	50.9469
DeepCDR	OAW-42	7	Urogenital System	114.23
DeepCDR	SCC-15	5	Aerodigestive Tract	113.026
DeepCDR	CAL-54	20	Kidney	170.826
DeepCDR	NCI-H1975	19	Lung (NSCLC)	62.0026
DeepCDR	NCI-H810	9	Lung (NSCLC)	137.532
DeepCDR	LS-180	7	Large Intestine	88.38
DeepCDR	CCK-81	14	Large Intestine	116.084
DeepCDR	ES-2	14	Urogenital System	82.0979
DeepCDR	HCC-44	16	Lung (NSCLC)	227.185
DeepCDR	TOV-21G	11	Urogenital System	257.168
DeepCDR	OCI-AML3	15	Leukemia	59.4433
DeepCDR	huH-1	7	Digestive System	405.92
DeepCDR	SU-DHL-8	16	Lymphoma	97.6587
DeepCDR	NCI-H526	8	Lung (SCLC)	29.9488
DeepCDR	HGC-27	13	Digestive System	85.7615
DeepCDR	IPC-298	11	Skin	105.001
DeepCDR	KYSE-150	7	Aerodigestive Tract	61.3929
DeepCDR	L-540	23	Lymphoma	68.457
DeepCDR	NALM-6	20	Leukemia	84.9605
DeepCDR	NCI-H838	11	Lung (NSCLC)	86.2309
DeepCDR	CAL-27	12	Aerodigestive Tract	67.6033
DeepCDR	23132-87	13	Digestive System	114.373
DeepCDR	PANC-03-27	5	Pancreas	111.676
DeepCDR	BICR22	18	Aerodigestive Tract	89.1744
DeepCDR	HARA	16	Lung (NSCLC)	67.9281
DeepCDR	NCI-H196	2	Lung (SCLC)	48.425
DeepCDR	NCI-H2023	8	Lung (NSCLC)	194.094
DeepCDR	NCI-H2110	8	Lung (NSCLC)	54.2125
DeepCDR	MOLM-13	23	Leukemia	115.539
DeepCDR	MOLP-8	19	Myeloma	110.278
DeepCDR	NU-DUL-1	19	Lymphoma	128.833
DeepCDR	PL-21	18	Leukemia	82.9
DeepCDR	RCH-ACV	19	Leukemia	144.792
DeepCDR	SU-DHL-10	14	Lymphoma	238.145
DeepCDR	SU-DHL-5	23	Lymphoma	121.239
DeepCDR	SU-DHL-6	22	Lymphoma	105.767
DeepCDR	SNU-175	16	Large Intestine	150.528
DeepCDR	HSC-2	16	Aerodigestive Tract	52.3344
DeepCDR	KNS-62	4	Lung (NSCLC)	78.785
DeepCDR	TE-1	15	Aerodigestive Tract	207.712
DeepCDR	NCI-H522	8	Lung (NSCLC)	64.355
DeepCDR	MCF7	6	Breast	53.2117
DeepCDR	OVCAR-4	2	Urogenital System	51.515
DeepCDR	ABC-1	8	Lung (NSCLC)	54.545
DeepCDR	BT-20	11	Breast	398.757
DeepCDR	EFO-27	9	Urogenital System	64.9444
DeepCDR	HCC1419	3	Breast	36.62
DeepCDR	HSC-4	11	Aerodigestive Tract	88.8309
DeepCDR	HuP-T3	6	Pancreas	91.2983
DeepCDR	HT-115	13	Large Intestine	113.192
DeepCDR	KYSE-180	11	Aerodigestive Tract	122.45
DeepCDR	LS-123	5	Large Intestine	56.288
DeepCDR	NCI-H747	13	Large Intestine	71.5731
DeepCDR	RT-112	11	Urogenital System	45.4373
DeepCDR	SCC-9	7	Aerodigestive Tract	106.249
DeepCDR	T84	9	Large Intestine	60.0356
DeepCDR	OE19	10	Aerodigestive Tract	83.606
DeepCDR	SCC-4	5	Aerodigestive Tract	485.742
DeepCDR	MDA-MB-157	5	Breast	81.754
DeepCDR	RL95-2	9	Urogenital System	746.604
DeepCDR	CAMA-1	7	Breast	33.1657
DeepCDR	KYM-1	16	Soft Tissue	97.0337
DeepCDR	SU8686	2	Pancreas	234.285
DeepCDR	OE21	12	Aerodigestive Tract	117.65
DeepCDR	PA-TU-8902	6	Pancreas	148.452
DeepCDR	TOV-112D	10	Urogenital System	414.684
DeepCDR	VCaP	9	Urogenital System	96.75
DeepCDR	OVK-18	9	Urogenital System	122.803
DeepCDR	SNU-81	6	Large Intestine	54.9233
DeepCDR	SK-ES-1	17	Bone	74.2424
DeepCDR	NCI-H661	6	Lung (NSCLC)	53.385
DeepCDR	NCI-H1963	11	Lung (SCLC)	89.6282
DeepCDR	SK-N-SH	11	Neuroblastoma	152.698
DeepCDR	SHP-77	4	Lung (SCLC)	104.647
DeepCDR	CAL-12T	9	Lung (NSCLC)	33.6867
DeepCDR	HL-60	11	Leukemia	315.244
DeepCDR	SK-OV-3	4	Urogenital System	91.0225
DeepCDR	A253	6	Aerodigestive Tract	118.677
DeepCDR	647-V	8	Urogenital System	82.54
DeepCDR	Daoy	8	Nervous System	28.36
DeepCDR	Detroit562	22	Aerodigestive Tract	89.7968
DeepCDR	DK-MG	9	Nervous System	58.1944
DeepCDR	KG-1	9	Leukemia	90.2322
DeepCDR	LoVo	18	Large Intestine	81.9156
DeepCDR	LS-411N	12	Large Intestine	213.782
DeepCDR	MHH-CALL-2	23	Leukemia	82.4643
DeepCDR	NCI-N87	13	Digestive System	120.149
DeepCDR	OPM-2	11	Myeloma	28.15
DeepCDR	PF-382	22	Leukemia	100.335
DeepCDR	SKM-1	22	Leukemia	96.5245
DeepCDR	SNU-449	3	Digestive System	64.8167
DeepCDR	THP-1	15	Leukemia	65.57
DeepCDR	ZR-75-30	4	Breast	31.5375
DeepCDR	KM-H2	13	Lymphoma	706.768
DeepCDR	BV-173	16	Leukemia	62.0756
DeepCDR	RPMI-7951	14	Skin	108.495
DeepCDR	UACC-812	7	Breast	84.9329
DeepCDR	BFTC-905	17	Urogenital System	112.774
DeepCDR	A3-KAW	20	Lymphoma	75.9485
DeepCDR	OCI-AML2	18	Leukemia	61.3628
DeepCDR	8505C	12	Thyroid	156.643
DeepCDR	HDLM-2	12	Lymphoma	85.6833
DeepCDR	TE-11	18	Aerodigestive Tract	52.6111
DeepCDR	NCI-H647	9	Lung (NSCLC)	46.1511
DeepCDR	NCI-H841	8	Lung (SCLC)	32.5213
DeepCDR	SNU-398	15	Digestive System	176.4
DeepCDR	HDQ-P1	17	Breast	86.5676
DeepCDR	PANC-02-03	11	Pancreas	219.993
DeepCDR	HCC1500	6	Breast	105.722
DeepCDR	KCL-22	18	Leukemia	113.039
DeepCDR	L-1236	18	Lymphoma	76.5833
DeepCDR	MOLM-16	19	Leukemia	123.366
DeepCDR	OCI-AML5	11	Leukemia	59.5182
DeepCDR	JHOS-2	11	Urogenital System	86.3718
DeepCDR	SNU-1040	4	Large Intestine	39.705
DeepCDR	SNU-407	7	Large Intestine	62.4771
DeepCDR	SNU-61	6	Large Intestine	150.503
DeepCDR	COR-L23	11	Lung (NSCLC)	52.5318
DeepCDR	HCC1395	6	Breast	60.7
DeepCDR	IGROV-1	18	Urogenital System	85.9578
DeepCDR	GAMG	15	Nervous System	56.466
DeepCDR	HOS	10	Bone	597.685
DeepCDR	KU812	25	Leukemia	119.756
DeepCDR	SNU-387	9	Digestive System	48.7833
DeepCDR	SUP-T1	14	Leukemia	62.1479
DeepCDR	COLO-668	8	Lung (SCLC)	101.425
DeepCDR	ST486	18	Lymphoma	89.8711
DeepCDR	BT-474	6	Breast	51.1567
DeepCDR	EN	9	Urogenital System	40.0633
DeepCDR	AMO-1	18	Myeloma	71.0589
DeepCDR	KMRC-1	4	Kidney	34.1675
DeepCDR	JEKO-1	16	Lymphoma	61.7294
DeepCDR	WSU-DLCL2	15	Lymphoma	126.745
DeepCDR	DOHH-2	19	Lymphoma	81.7747
DeepCDR	NCI-H1650	3	Lung (NSCLC)	107.153
DeepCDR	NCI-H2170	8	Lung (NSCLC)	171.562
DeepCDR	COR-L311	11	Lung (SCLC)	108.786
DeepCDR	NCI-H1092	2	Lung (SCLC)	46.65
DeepCDR	NCI-H2227	6	Lung (SCLC)	107.865
DeepCDR	TE-8	11	Aerodigestive Tract	54.3727
DeepCDR	A549	16	Lung (NSCLC)	125.299
DeepCDR	ACHN	18	Kidney	54.7617
DeepCDR	CAKI-1	5	Kidney	161.386
DeepCDR	SF268	8	Nervous System	102.15
DeepCDR	OVCAR-8	10	Urogenital System	44.513
DeepCDR	ECC10	19	Digestive System	101.666
DeepCDR	LAMA-84	16	Leukemia	101.638
DeepCDR	MONO-MAC-6	17	Leukemia	156.252
DeepCDR	NUGC-3	9	Digestive System	29.3978
DeepCDR	NCI-H1155	13	Lung (NSCLC)	91.8546
DeepCDR	SF126	6	Nervous System	1063.61
DeepCDR	SW1116	4	Large Intestine	112.89
DeepCDR	SW48	15	Large Intestine	523.025
DeepCDR	CHP-126	13	Neuroblastoma	48.1477
DeepCDR	LCLC-97TM1	12	Lung (NSCLC)	125.528
DeepCDR	FU-OV-1	3	Urogenital System	36.13
DeepCDR	NCI-H1915	6	Lung (NSCLC)	42.3683
DeepCDR	LOU-NH91	9	Lung (NSCLC)	58.9022
DeepCDR	NCI-H1341	11	Lung (SCLC)	69.8445
DeepCDR	NCI-H1876	13	Lung (SCLC)	71.7454
DeepCDR	EPLC-272H	9	Lung (NSCLC)	177.203
DeepCDR	GDM-1	14	Leukemia	97.2571
DeepCDR	BFTC-909	9	Kidney	79.9989
DeepCDR	OCI-LY-19	18	Lymphoma	121.735
DeepCDR	RPMI-8402	18	Leukemia	101.891
DeepCDR	TE-10	13	Aerodigestive Tract	78.2108
DeepCDR	GCT	8	Soft Tissue	972.622
DeepCDR	MDA-MB-453	15	Breast	225.449
DeepCDR	P12-ICHIKAWA	11	Leukemia	42.6282
DeepCDR	P31-FUJ	14	Leukemia	87.955
DeepCDR	REH	13	Leukemia	240.842
DeepCDR	AU565	16	Breast	68.5144
DeepCDR	BEN	11	Lung (NSCLC)	71.2827
DeepCDR	ECC12	5	Digestive System	66.534
DeepCDR	JVM-3	24	Lymphoma	83.805
DeepCDR	RL	14	Lymphoma	133.647
DeepCDR	JM1	12	Lymphoma	201.963
DeepCDR	5637	9	Urogenital System	45.2011
DeepCDR	NCI-H2030	8	Lung (NSCLC)	126.96
DeepCDR	LU-65	9	Lung (NSCLC)	294.308
DeepCDR	A375	13	Skin	91.33
DeepCDR	COLO-792	16	Skin	138.312
DeepCDR	CFPAC-1	9	Pancreas	327.112
DeepCDR	G-361	11	Skin	51.2491
DeepCDR	IGR-1	13	Skin	76.2646
DeepCDR	KATOIII	6	Digestive System	108.295
DeepCDR	NCI-H716	18	Large Intestine	247.422
DeepCDR	RCM-1	6	Large Intestine	57.1317
DeepCDR	SK-HEP-1	10	Digestive System	64.764
DeepCDR	SK-MEL-30	11	Skin	146.92
DeepCDR	SK-UT-1	8	Soft Tissue	79.29
DeepCDR	SNU-423	12	Digestive System	275.557
DeepCDR	CA46	15	Lymphoma	127.918
DeepCDR	COR-L279	10	Lung (SCLC)	123.853
DeepCDR	CML-T1	16	Leukemia	82.7225
DeepCDR	Caov-4	10	Urogenital System	47.205
DeepCDR	NCI-H211	16	Lung (SCLC)	129.011
DeepCDR	RERF-GC-1B	15	Digestive System	652.53
DeepCDR	SU-DHL-4	14	Lymphoma	45.5707
DeepCDR	MM1S	16	Myeloma	50.6231
DeepCDR	42-MG-BA	8	Nervous System	33.0775
DeepCDR	YKG-1	5	Nervous System	68.966
DeepCDR	SK-N-DZ	8	Neuroblastoma	71.4813
DeepCDR	Calu-6	5	Lung (NSCLC)	76.118
DeepCDR	LCLC-103H	10	Lung (NSCLC)	640.733
DeepCDR	HOP-92	5	Lung (NSCLC)	118.97
DeepCDR	LOXIMVI	24	Skin	94.1975
DeepCDR	SF539	16	Nervous System	131.117
DeepCDR	Becker	3	Nervous System	45.7467
DeepCDR	Daudi	16	Lymphoma	65.44
DeepCDR	FADU	15	Aerodigestive Tract	406.658
DeepCDR	KALS-1	7	Nervous System	242.179
DeepCDR	LP-1	9	Myeloma	65.6611
DeepCDR	MOLT-16	23	Leukemia	65.1539
DeepCDR	NCI-H1436	5	Lung (SCLC)	44.482
DeepCDR	ONS-76	7	Nervous System	91.4329
DeepCDR	NCI-H146	10	Lung (SCLC)	38.056
DeepCDR	NCI-H1651	5	Lung (NSCLC)	98.872
DeepCDR	CAL-51	14	Breast	58.1786
DeepCDR	MKN7	4	Digestive System	30.165
DeepCDR	EJM	13	Myeloma	45.3523
DeepCDR	OCI-M1	18	Leukemia	56.2428
DeepCDR	OV-7	13	Urogenital System	90.6146
DeepCDR	Saos-2	5	Bone	28.672
DeepCDR	HPAF-II	8	Pancreas	39.5862
DeepCDR	KYSE-140	8	Aerodigestive Tract	78.8312
DeepCDR	EKVX	4	Lung (NSCLC)	80.8225
DeepCDR	8305C	6	Thyroid	68.4617
DeepCDR	SW1088	6	Nervous System	1568.34
DeepCDR	TE-6	7	Aerodigestive Tract	40.6714
DeepCDR	NCI-H1944	10	Lung (NSCLC)	31.236
DeepCDR	HCC-827	10	Lung (NSCLC)	120.053
DeepCDR	HCC1806	12	Breast	95.805
DeepCDR	RERF-LC-MS	17	Lung (NSCLC)	131.355
DeepCDR	HCC-15	10	Lung (NSCLC)	43.211
DeepCDR	A2780	15	Urogenital System	68.7813
DeepCDR	L-428	12	Lymphoma	61.9517
DeepCDR	RD	9	Soft Tissue	73.7522
DeepCDR	SK-MEL-24	12	Skin	46.2725
DeepCDR	SW1417	5	Large Intestine	83.998
DeepCDR	COLO-684	7	Urogenital System	92.0114
DeepCDR	CAL-85-1	6	Breast	81.28
DeepCDR	BCPAP	7	Thyroid	231.986
DeepCDR	OVISE	12	Urogenital System	89.0258
DeepCDR	TT2609-C02	2	Thyroid	28.855
DeepCDR	SW1271	4	Lung (SCLC)	54.2175
DeepCDR	NCI-H69	6	Lung (SCLC)	65.4117
DeepCDR	MEL-HO	11	Skin	375.299
DeepCDR	KMS-11	14	Myeloma	84.7014
DeepCDR	RERF-LC-KJ	7	Lung (NSCLC)	146.809
DeepCDR	ME-1	12	Leukemia	98.3342
DeepCDR	NCI-H1623	7	Lung (NSCLC)	45.3457
DeepCDR	LOUCY	15	Leukemia	50.456
DeepCDR	COLO-800	11	Skin	90.59
DeepCDR	COLO-829	4	Skin	66.95
DeepCDR	SF295	6	Nervous System	102.202
DeepCDR	NCI-H2196	3	Lung (SCLC)	113.943
DeepCDR	SIG-M5	13	Leukemia	44.3069
DeepCDR	SJSA-1	10	Bone	64.669
DeepCDR	SU-DHL-1	8	Lymphoma	273.351
DeepCDR	TGBC11TKB	8	Digestive System	103.174
DeepCDR	A704	11	Kidney	45.8609
DeepCDR	MKN45	11	Digestive System	69.8455
DeepCDR	TE-9	5	Aerodigestive Tract	67
DeepCDR	CL-11	6	Large Intestine	45.305
DeepCDR	NCI-H1568	4	Lung (NSCLC)	282.71
DeepCDR	TCCSUP	9	Urogenital System	92.6933
DeepCDR	NCI-H2228	5	Lung (NSCLC)	56.012
DeepCDR	NCI-H2342	3	Lung (NSCLC)	57.83
DeepCDR	SK-N-FI	5	Neuroblastoma	100.744
DeepCDR	NCI-H2087	10	Lung (NSCLC)	71.97
DeepCDR	NCI-H2291	3	Lung (NSCLC)	41.3767
DeepCDR	DMS-79	5	Lung (SCLC)	89.938
DeepCDR	J82	4	Urogenital System	441.99
DeepCDR	MDA-MB-231	11	Breast	138.196
DeepCDR	HOP-62	3	Lung (NSCLC)	68.01
DeepCDR	HH	3	Leukemia	39.9367
DeepCDR	LS-513	9	Large Intestine	194.64
DeepCDR	Mewo	4	Skin	19.2825
DeepCDR	NCI-H596	7	Lung (NSCLC)	189.829
DeepCDR	NCI-H1793	5	Lung (NSCLC)	76.972
DeepCDR	SW837	5	Large Intestine	74.002
DeepCDR	PSN1	9	Pancreas	87.25
DeepCDR	AM-38	11	Nervous System	79.93
DeepCDR	TE-441-T	10	Soft Tissue	29.203
DeepCDR	HCC-366	8	Lung (NSCLC)	76.4625
DeepCDR	LN-229	3	Nervous System	64.98
DeepCDR	ML-1	3	Thyroid	196.677
DeepCDR	FU97	7	Digestive System	79.53
DeepCDR	RKN	3	Urogenital System	153.707
DeepCDR	DMS-114	11	Lung (SCLC)	312.973
DeepCDR	KYSE-520	8	Aerodigestive Tract	71.475
DeepCDR	BT-549	12	Breast	75.9192
DeepCDR	CAL-120	5	Breast	197.514
DeepCDR	CAL-62	8	Thyroid	84.93
DeepCDR	NCI-H358	7	Lung (NSCLC)	64.7314
DeepCDR	C2BBe1	6	Large Intestine	34.1333
DeepCDR	PANC-08-13	3	Pancreas	38.2867
DeepCDR	OVTOKO	6	Urogenital System	73.585
DeepCDR	PANC-04-03	6	Pancreas	116.362
DeepCDR	NCI-H1648	11	Lung (NSCLC)	90.7218
DeepCDR	SNB75	3	Nervous System	105.027
DeepCDR	SK-CO-1	16	Large Intestine	75.56
DeepCDR	A101D	12	Skin	255.449
DeepCDR	NB1	4	Neuroblastoma	42.905
DeepCDR	U-118-MG	9	Nervous System	74.8233
DeepCDR	SW1573	2	Lung (NSCLC)	63.395
DeepCDR	TE-5	4	Aerodigestive Tract	67.0925
DeepCDR	BHY	6	Aerodigestive Tract	52.21
DeepCDR	SK-MEL-28	8	Skin	46.1475
DeepCDR	HT-1080	7	Soft Tissue	30.5157
DeepCDR	HuCCT1	9	Digestive System	90.0178
DeepCDR	MFE-296	4	Urogenital System	18.6375
DeepCDR	NCI-H1105	5	Lung (SCLC)	31.126
DeepCDR	SK-MEL-31	3	Skin	455.843
DeepCDR	PA-TU-8988T	11	Pancreas	130.428
DeepCDR	DAN-G	8	Pancreas	362.269
DeepCDR	NCI-H2172	2	Lung (NSCLC)	38.63
DeepCDR	RT4	6	Urogenital System	100.245
DeepCDR	NCI-H727	3	Lung (NSCLC)	242.38
DeepCDR	NCI-H1792	12	Lung (NSCLC)	176.041
DeepCDR	HCC1143	8	Breast	273.401
DeepCDR	DBTRG-05MG	4	Nervous System	92.08
DeepCDR	HT-1197	6	Urogenital System	94.0617
DeepCDR	SK-MEL-3	11	Skin	3424.72
DeepCDR	OCUM-1	9	Digestive System	243.472
DeepCDR	NCI-H2009	8	Lung (NSCLC)	322.51
DeepCDR	HCC1599	10	Breast	106.655
DeepCDR	HCC1937	2	Breast	656.865
DeepCDR	C32	8	Skin	70.7575
DeepCDR	RMG-I	4	Urogenital System	39.0325
DeepCDR	U-2-OS	9	Bone	103.556
DeepCDR	UACC-893	7	Breast	49.8757
DeepCDR	NCI-H650	3	Lung (NSCLC)	46.7067
DeepCDR	UACC-62	15	Skin	270.48
DeepCDR	KU-19-19	12	Urogenital System	69.1908
DeepCDR	TYK-nu	4	Urogenital System	100.77
DeepCDR	SUIT-2	3	Pancreas	142.513
DeepCDR	SW780	3	Urogenital System	48.6133
DeepCDR	HuH-7	3	Digestive System	17.5767
DeepCDR	SNU-C1	6	Large Intestine	28.0167
DeepCDR	SK-MEL-5	9	Skin	74.0856
DeepCDR	UACC-257	8	Skin	68.0487
DeepCDR	OV-90	5	Urogenital System	141.082
DeepCDR	BxPC-3	10	Pancreas	51.122
DeepCDR	NCI-H2452	4	Lung	71.795
DeepCDR	PANC-10-05	7	Pancreas	77.4671
DeepCDR	MDST8	11	Large Intestine	130.571
DeepCDR	NCI-H2085	3	Lung (NSCLC)	98.52
DeepCDR	COR-L88	3	Lung (SCLC)	31.79
DeepCDR	NCI-H2052	2	Lung	80.975
DeepCDR	Calu-3	3	Lung (NSCLC)	131.91
DeepCDR	OV-56	3	Urogenital System	78.0933
DeepCDR	NCI-H2029	4	Lung (SCLC)	217.34
DeepCDR	SCC-25	1	Aerodigestive Tract	16.97
DeepCDR	MDA-MB-436	7	Breast	24.8357
DeepCDR	BICR31	9	Aerodigestive Tract	118.426
DeepCDR	NCI-H2405	9	Lung (NSCLC)	165.069
DeepCDR	HCC2218	5	Breast	29.732
DeepCDR	PC-3	5	Urogenital System	28.832
DeepCDR	COLO-678	3	Large Intestine	30.6233
DeepCDR	A204	3	Soft Tissue	99.2433
DeepCDR	COLO-783	7	Skin	67.3229
DeepCDR	GB-1	5	Nervous System	25.616
DeepCDR	ChaGo-K-1	5	Lung (NSCLC)	105.076
DeepCDR	NCI-H1435	2	Lung (NSCLC)	176.625
DeepCDR	T-T	6	Aerodigestive Tract	61.7383
DeepCDR	U-87-MG	4	Nervous System	157.468
DeepCDR	YAPC	2	Pancreas	91.99
DeepCDR	OAW-28	3	Urogenital System	366.553
DeepCDR	HPAC	8	Pancreas	76.4688
DeepCDR	SW1990	4	Pancreas	54.4625
DeepCDR	QGP-1	4	Pancreas	86.73
DeepCDR	RCC10RGB	1	Kidney	137.43
DeepCDR	SW1710	2	Urogenital System	26.315
DeepCDR	KYSE-70	3	Aerodigestive Tract	30.68
DeepCDR	EFM-19	4	Breast	126.545
DeepCDR	COR-L95	4	Lung (SCLC)	114.487
DeepCDR	SK-MEL-1	5	Skin	78.958
DeepCDR	HCC1428	2	Breast	23.83
DeepCDR	VMRC-RCZ	2	Kidney	32.555
DeepCDR	NCI-H2347	1	Lung (NSCLC)	0.98
DeepCDR	RVH-421	2	Skin	21.23
DeepCDR	COLO-680N	1	Aerodigestive Tract	2.94
DeepCDR	DMS-53	3	Lung (SCLC)	95.2867
DeepCDR	NCI-H1836	1	Lung (SCLC)	19.25
DeepCDR	OVKATE	1	Urogenital System	60.46
DeepCDR	IA-LM	2	Lung (NSCLC)	125.26
DrugCell	SK-MM-2	5	Myeloma	120.491
DrugCell	RPMI-8226	17	Myeloma	51.924
DrugCell	NCI-H23	8	Lung (NSCLC)	61.6416
DrugCell	BL-41	21	Lymphoma	72.3541
DrugCell	A673	10	Soft Tissue	231.399
DrugCell	YH-13	10	Nervous System	64.2525
DrugCell	ALL-SIL	15	Leukemia	55.6128
DrugCell	AGS	16	Digestive System	254.154
DrugCell	NOMO-1	10	Leukemia	156.692
DrugCell	DND-41	21	Leukemia	130.583
DrugCell	639-V	5	Urogenital System	70.5592
DrugCell	WM-115	8	Skin	80.9818
DrugCell	HCT-15	16	Large Intestine	31.9509
DrugCell	Jurkat	26	Leukemia	93.664
DrugCell	D-283MED	13	Nervous System	199.441
DrugCell	HCT-116	19	Large Intestine	62.8309
DrugCell	EC-GI-10	18	Aerodigestive Tract	96.1314
DrugCell	HCC1569	8	Breast	132.615
DrugCell	HSC-3	10	Aerodigestive Tract	91.3139
DrugCell	697	15	Leukemia	67.1109
DrugCell	TE-15	10	Aerodigestive Tract	51.2878
DrugCell	TE-4	12	Aerodigestive Tract	115.706
DrugCell	A498	5	Kidney	40.2679
DrugCell	MES-SA	18	Urogenital System	116.996
DrugCell	MDA-MB-468	13	Breast	42.2324
DrugCell	MDA-MB-415	12	Breast	224.228
DrugCell	NCI-H28	8	Lung	42.858
DrugCell	OS-RC-2	4	Kidney	46.2177
DrugCell	NUGC-4	9	Digestive System	52.0268
DrugCell	HCC1954	9	Breast	67.4288
DrugCell	KMS-12-BM	20	Myeloma	68.2861
DrugCell	NCI-H1781	8	Lung (NSCLC)	102.686
DrugCell	IGR-37	9	Skin	48.9977
DrugCell	EFM-192A	10	Breast	110.42
DrugCell	MDA-MB-361	12	Breast	125.895
DrugCell	COR-L105	8	Lung (NSCLC)	45.2906
DrugCell	MEG-01	22	Leukemia	110.782
DrugCell	HCC70	9	Breast	445.028
DrugCell	CW-2	10	Large Intestine	70.2394
DrugCell	KYSE-510	9	Aerodigestive Tract	38.3488
DrugCell	K-562	8	Leukemia	39.5228
DrugCell	HT-144	15	Skin	345.768
DrugCell	NCI-H82	17	Lung (SCLC)	79.2667
DrugCell	DMS-273	21	Lung (SCLC)	69.5826
DrugCell	CAS-1	10	Nervous System	44.7129
DrugCell	ESS-1	19	Urogenital System	166.045
DrugCell	A4-Fuk	24	Lymphoma	666.235
DrugCell	OE33	11	Aerodigestive Tract	210.278
DrugCell	NAMALWA	20	Lymphoma	89.2998
DrugCell	DU-4475	22	Breast	233.122
DrugCell	RS4-11	16	Leukemia	75.3825
DrugCell	FTC-133	9	Thyroid	90.291
DrugCell	8-MG-BA	17	Nervous System	87.6355
DrugCell	KP-N-YN	8	Neuroblastoma	110.468
DrugCell	KM12	14	Large Intestine	111.103
DrugCell	HCC2157	12	Breast	120.647
DrugCell	WM793B	13	Skin	70.8551
DrugCell	22RV1	10	Urogenital System	49.6337
DrugCell	JURL-MK1	16	Leukemia	145.316
DrugCell	KOPN-8	19	Leukemia	131.907
DrugCell	COLO-679	11	Skin	196.369
DrugCell	SUP-B15	14	Leukemia	226.36
DrugCell	H4	15	Nervous System	68.4672
DrugCell	SBC-5	10	Lung (SCLC)	341.288
DrugCell	KMRC-20	7	Kidney	42.5096
DrugCell	SNU-C5	12	Large Intestine	138.464
DrugCell	A2058	18	Skin	136.537
DrugCell	MKN1	9	Digestive System	57.6609
DrugCell	T47D	10	Breast	111.264
DrugCell	GI-1	12	Nervous System	68.0962
DrugCell	NCI-H2122	21	Lung (NSCLC)	102.233
DrugCell	CAL-29	14	Urogenital System	250.957
DrugCell	HCC-78	18	Lung (NSCLC)	96.1788
DrugCell	MEL-JUSO	3	Skin	69.3121
DrugCell	DB	12	Lymphoma	419.708
DrugCell	L-363	8	Myeloma	54.6502
DrugCell	GA-10	18	Lymphoma	51.9628
DrugCell	CAL-33	10	Aerodigestive Tract	48.6502
DrugCell	SW1463	7	Large Intestine	69.1809
DrugCell	SK-N-AS	7	Neuroblastoma	279.869
DrugCell	NCI-H929	22	Myeloma	190.29
DrugCell	OCI-AML3	15	Leukemia	65.3438
DrugCell	OAW-42	7	Urogenital System	297.183
DrugCell	NCI-H810	9	Lung (NSCLC)	101.408
DrugCell	NCI-H1975	19	Lung (NSCLC)	133.082
DrugCell	SK-MES-1	10	Lung (NSCLC)	78.5347
DrugCell	SK-MEL-2	9	Skin	153.272
DrugCell	HCC1187	9	Breast	87.5989
DrugCell	RKO	12	Large Intestine	109.564
DrugCell	NCI-H446	15	Lung (SCLC)	156.011
DrugCell	SW620	12	Large Intestine	225.745
DrugCell	HCC-44	16	Lung (NSCLC)	180.385
DrugCell	TOV-21G	11	Urogenital System	66.9244
DrugCell	LXF-289	13	Lung (NSCLC)	1064.95
DrugCell	CAL-54	20	Kidney	86.8288
DrugCell	SH-4	7	Skin	190.412
DrugCell	SU-DHL-8	16	Lymphoma	87.0438
DrugCell	SNG-M	13	Urogenital System	75.628
DrugCell	Raji	18	Lymphoma	60.9496
DrugCell	KARPAS-422	19	Lymphoma	179.683
DrugCell	SW948	13	Large Intestine	11019.5
DrugCell	NCI-H209	12	Lung (SCLC)	178.389
DrugCell	EBC-1	12	Lung (NSCLC)	115.576
DrugCell	Hs-578-T	11	Breast	41.0151
DrugCell	EM-2	19	Leukemia	237.078
DrugCell	NCI-H1048	8	Lung (SCLC)	98.7541
DrugCell	UM-UC-3	7	Urogenital System	51.1405
DrugCell	CCK-81	14	Large Intestine	66.8969
DrugCell	LS-180	7	Large Intestine	610.495
DrugCell	SCC-15	5	Aerodigestive Tract	40.5931
DrugCell	NCI-H524	15	Lung (SCLC)	62.7303
DrugCell	huH-1	7	Digestive System	89.9074
DrugCell	CHP-212	21	Neuroblastoma	301.051
DrugCell	ES-2	14	Urogenital System	70.1723
DrugCell	BHT-101	13	Thyroid	152.91
DrugCell	NCI-H838	11	Lung (NSCLC)	156.967
DrugCell	NALM-6	20	Leukemia	60.1413
DrugCell	SU-DHL-10	14	Lymphoma	189.815
DrugCell	CAL-27	12	Aerodigestive Tract	46.2224
DrugCell	SNU-175	16	Large Intestine	107.305
DrugCell	PANC-03-27	5	Pancreas	60.8835
DrugCell	NCI-H526	8	Lung (SCLC)	334.79
DrugCell	SU-DHL-5	23	Lymphoma	108.983
DrugCell	HGC-27	13	Digestive System	74.3577
DrugCell	MOLP-8	19	Myeloma	58.1947
DrugCell	KYSE-150	7	Aerodigestive Tract	65.8007
DrugCell	IPC-298	11	Skin	35.4246
DrugCell	PL-21	18	Leukemia	121.869
DrugCell	NCI-H2023	8	Lung (NSCLC)	346.797
DrugCell	BICR22	18	Aerodigestive Tract	221.775
DrugCell	MOLM-13	23	Leukemia	85.336
DrugCell	23132-87	13	Digestive System	118.499
DrugCell	RCH-ACV	19	Leukemia	79.2775
DrugCell	L-540	23	Lymphoma	112.002
DrugCell	SU-DHL-6	22	Lymphoma	61.6798
DrugCell	NCI-H2110	8	Lung (NSCLC)	114.879
DrugCell	HARA	16	Lung (NSCLC)	265.417
DrugCell	NU-DUL-1	19	Lymphoma	1405.3
DrugCell	NCI-H196	2	Lung (SCLC)	282.338
DrugCell	BT-20	11	Breast	177.204
DrugCell	EFO-27	9	Urogenital System	111.067
DrugCell	KYM-1	16	Soft Tissue	164.734
DrugCell	CAMA-1	7	Breast	273.329
DrugCell	TE-1	15	Aerodigestive Tract	193.442
DrugCell	SU8686	2	Pancreas	17.3548
DrugCell	ABC-1	8	Lung (NSCLC)	435.23
DrugCell	PA-TU-8902	6	Pancreas	65.641
DrugCell	OVCAR-4	2	Urogenital System	64.2586
DrugCell	SNU-81	6	Large Intestine	57.4396
DrugCell	HT-115	13	Large Intestine	53.6469
DrugCell	MDA-MB-157	5	Breast	159.955
DrugCell	TOV-112D	10	Urogenital System	49.3408
DrugCell	KNS-62	4	Lung (NSCLC)	92.3609
DrugCell	HCC1419	3	Breast	129.243
DrugCell	T84	9	Large Intestine	84.9097
DrugCell	OE21	12	Aerodigestive Tract	58.2186
DrugCell	HSC-4	11	Aerodigestive Tract	84.0462
DrugCell	KYSE-180	11	Aerodigestive Tract	196.053
DrugCell	HSC-2	16	Aerodigestive Tract	82.7506
DrugCell	HuP-T3	6	Pancreas	117.192
DrugCell	VCaP	9	Urogenital System	69.7428
DrugCell	SCC-9	7	Aerodigestive Tract	987.192
DrugCell	NCI-H522	8	Lung (NSCLC)	47.1486
DrugCell	OVK-18	9	Urogenital System	52.9228
DrugCell	OE19	10	Aerodigestive Tract	155.349
DrugCell	NCI-H747	13	Large Intestine	93.8216
DrugCell	LS-123	5	Large Intestine	57.6564
DrugCell	RT-112	11	Urogenital System	78.15
DrugCell	SCC-4	5	Aerodigestive Tract	321.306
DrugCell	MCF7	6	Breast	442.299
DrugCell	RL95-2	9	Urogenital System	88.28
DrugCell	MHH-CALL-2	23	Leukemia	161.824
DrugCell	Detroit562	22	Aerodigestive Tract	64.1763
DrugCell	BV-173	16	Leukemia	57.7632
DrugCell	CAL-12T	9	Lung (NSCLC)	50.9484
DrugCell	OCI-AML5	11	Leukemia	52.7671
DrugCell	HDQ-P1	17	Breast	209.695
DrugCell	OPM-2	11	Myeloma	188.619
DrugCell	NCI-N87	13	Digestive System	89.8735
DrugCell	BFTC-905	17	Urogenital System	56.6886
DrugCell	HDLM-2	12	Lymphoma	43.4368
DrugCell	HL-60	11	Leukemia	53.2108
DrugCell	UACC-812	7	Breast	48.5764
DrugCell	A253	6	Aerodigestive Tract	168.212
DrugCell	SKM-1	22	Leukemia	162.628
DrugCell	KM-H2	13	Lymphoma	126.955
DrugCell	NCI-H647	9	Lung (NSCLC)	91.4335
DrugCell	SNU-407	7	Large Intestine	49.9009
DrugCell	TE-11	18	Aerodigestive Tract	76.3795
DrugCell	ZR-75-30	4	Breast	60.5465
DrugCell	KCL-22	18	Leukemia	116.442
DrugCell	RPMI-7951	14	Skin	72.6796
DrugCell	NCI-H841	8	Lung (SCLC)	34.0473
DrugCell	OCI-AML2	18	Leukemia	91.4624
DrugCell	KG-1	9	Leukemia	2793.24
DrugCell	A3-KAW	20	Lymphoma	143.529
DrugCell	SNU-398	15	Digestive System	49.2611
DrugCell	SK-N-SH	11	Neuroblastoma	43.4278
DrugCell	SHP-77	4	Lung (SCLC)	366.65
DrugCell	THP-1	15	Leukemia	133.545
DrugCell	SK-ES-1	17	Bone	116.569
DrugCell	SNU-1040	4	Large Intestine	293.735
DrugCell	Daoy	8	Nervous System	39.7119
DrugCell	LS-411N	12	Large Intestine	75.0178
DrugCell	HCC1500	6	Breast	160.54
DrugCell	SNU-449	3	Digestive System	56.4484
DrugCell	MOLM-16	19	Leukemia	68.639
DrugCell	NCI-H1963	11	Lung (SCLC)	67.9791
DrugCell	L-1236	18	Lymphoma	158.335
DrugCell	LoVo	18	Large Intestine	67.4668
DrugCell	DK-MG	9	Nervous System	126.003
DrugCell	PF-382	22	Leukemia	62.5596
DrugCell	647-V	8	Urogenital System	51.8124
DrugCell	JHOS-2	11	Urogenital System	42.687
DrugCell	NCI-H661	6	Lung (NSCLC)	121.491
DrugCell	SNU-61	6	Large Intestine	28.3649
DrugCell	SK-OV-3	4	Urogenital System	12.1135
DrugCell	PANC-02-03	11	Pancreas	359.709
DrugCell	8505C	12	Thyroid	226.978
DrugCell	GAMG	15	Nervous System	63.1905
DrugCell	COLO-668	8	Lung (SCLC)	46.4139
DrugCell	HCC1395	6	Breast	69.3431
DrugCell	COR-L23	11	Lung (NSCLC)	43.9538
DrugCell	ST486	18	Lymphoma	147.918
DrugCell	SUP-T1	14	Leukemia	80.0271
DrugCell	EN	9	Urogenital System	72.7575
DrugCell	WSU-DLCL2	15	Lymphoma	61.9557
DrugCell	HOS	10	Bone	40.6617
DrugCell	BT-474	6	Breast	34.7992
DrugCell	JEKO-1	16	Lymphoma	200.453
DrugCell	SNU-387	9	Digestive System	41.7652
DrugCell	IGROV-1	18	Urogenital System	46.121
DrugCell	KMRC-1	4	Kidney	75.8807
DrugCell	KU812	25	Leukemia	60.8975
DrugCell	AMO-1	18	Myeloma	65.8137
DrugCell	DOHH-2	19	Lymphoma	209.689
DrugCell	NCI-H1650	3	Lung (NSCLC)	48.5171
DrugCell	ECC10	19	Digestive System	71.7324
DrugCell	A549	16	Lung (NSCLC)	75.6328
DrugCell	MONO-MAC-6	17	Leukemia	50.8404
DrugCell	ACHN	18	Kidney	203.644
DrugCell	CAKI-1	5	Kidney	36.7405
DrugCell	LAMA-84	16	Leukemia	268.712
DrugCell	TE-8	11	Aerodigestive Tract	84.7941
DrugCell	NCI-H1341	11	Lung (SCLC)	290.409
DrugCell	OVCAR-8	10	Urogenital System	96.5322
DrugCell	NCI-H1092	2	Lung (SCLC)	84.6535
DrugCell	COR-L311	11	Lung (SCLC)	155.06
DrugCell	NCI-H1915	6	Lung (NSCLC)	50.0665
DrugCell	LCLC-97TM1	12	Lung (NSCLC)	56.0261
DrugCell	SW1116	4	Large Intestine	615.671
DrugCell	NCI-H1876	13	Lung (SCLC)	65.5404
DrugCell	NCI-H2170	8	Lung (NSCLC)	46.4022
DrugCell	FU-OV-1	3	Urogenital System	38.807
DrugCell	SF268	8	Nervous System	244.569
DrugCell	NCI-H2227	6	Lung (SCLC)	131.652
DrugCell	NCI-H1155	13	Lung (NSCLC)	85.9695
DrugCell	CHP-126	13	Neuroblastoma	73.0994
DrugCell	SW48	15	Large Intestine	171.843
DrugCell	LOU-NH91	9	Lung (NSCLC)	119.313
DrugCell	NUGC-3	9	Digestive System	53.5423
DrugCell	SF126	6	Nervous System	242.627
DrugCell	GDM-1	14	Leukemia	116.933
DrugCell	BFTC-909	9	Kidney	33.2159
DrugCell	EPLC-272H	9	Lung (NSCLC)	120.908
DrugCell	OCI-LY-19	18	Lymphoma	56.2465
DrugCell	RPMI-8402	18	Leukemia	88.6051
DrugCell	REH	13	Leukemia	88.2355
DrugCell	P12-ICHIKAWA	11	Leukemia	40.2576
DrugCell	MDA-MB-453	15	Breast	62.7043
DrugCell	AU565	16	Breast	118.051
DrugCell	P31-FUJ	14	Leukemia	147.234
DrugCell	TE-10	13	Aerodigestive Tract	37.5684
DrugCell	GCT	8	Soft Tissue	30.939
DrugCell	ECC12	5	Digestive System	26.0251
DrugCell	RL	14	Lymphoma	94.6973
DrugCell	JM1	12	Lymphoma	608.683
DrugCell	BEN	11	Lung (NSCLC)	278.479
DrugCell	JVM-3	24	Lymphoma	54.6121
DrugCell	RCM-1	6	Large Intestine	122.861
DrugCell	RERF-GC-1B	15	Digestive System	72.971
DrugCell	NCI-H716	18	Large Intestine	98.9765
DrugCell	G-361	11	Skin	36.65
DrugCell	CA46	15	Lymphoma	211.145
DrugCell	SNU-423	12	Digestive System	42.2904
DrugCell	SK-HEP-1	10	Digestive System	236.129
DrugCell	SK-UT-1	8	Soft Tissue	99.8233
DrugCell	LU-65	9	Lung (NSCLC)	74.0014
DrugCell	5637	9	Urogenital System	1394.41
DrugCell	NCI-H2030	8	Lung (NSCLC)	123.224
DrugCell	CFPAC-1	9	Pancreas	38.9745
DrugCell	SK-MEL-30	11	Skin	108.123
DrugCell	IGR-1	13	Skin	104.773
DrugCell	A375	13	Skin	45.0436
DrugCell	SU-DHL-4	14	Lymphoma	45.4862
DrugCell	NCI-H211	16	Lung (SCLC)	220.587
DrugCell	KATOIII	6	Digestive System	148.087
DrugCell	MM1S	16	Myeloma	188.507
DrugCell	CML-T1	16	Leukemia	132.829
DrugCell	COLO-792	16	Skin	257.073
DrugCell	Caov-4	10	Urogenital System	111.3
DrugCell	COR-L279	10	Lung (SCLC)	116.886
DrugCell	LP-1	9	Myeloma	81.4286
DrugCell	LCLC-103H	10	Lung (NSCLC)	62.1818
DrugCell	MKN7	4	Digestive System	61.5288
DrugCell	KALS-1	7	Nervous System	78.2477
DrugCell	LOXIMVI	24	Skin	84.4819
DrugCell	MOLT-16	23	Leukemia	215.236
DrugCell	SF539	16	Nervous System	589.111
DrugCell	ONS-76	7	Nervous System	102.345
DrugCell	FADU	15	Aerodigestive Tract	100.306
DrugCell	Daudi	16	Lymphoma	61.0988
DrugCell	NCI-H1651	5	Lung (NSCLC)	98.3262
DrugCell	CAL-51	14	Breast	97.8815
DrugCell	EJM	13	Myeloma	51.6521
DrugCell	OV-7	13	Urogenital System	195.708
DrugCell	Calu-6	5	Lung (NSCLC)	65.6286
DrugCell	42-MG-BA	8	Nervous System	40.9656
DrugCell	Becker	3	Nervous System	29.4503
DrugCell	HOP-92	5	Lung (NSCLC)	137.243
DrugCell	NCI-H146	10	Lung (SCLC)	174.387
DrugCell	SK-N-DZ	8	Neuroblastoma	69.8062
DrugCell	OCI-M1	18	Leukemia	71.3803
DrugCell	NCI-H1436	5	Lung (SCLC)	115.113
DrugCell	YKG-1	5	Nervous System	68.5599
DrugCell	Saos-2	5	Bone	60.6821
DrugCell	NCI-H1944	10	Lung (NSCLC)	77.6002
DrugCell	8305C	6	Thyroid	127.224
DrugCell	EKVX	4	Lung (NSCLC)	221.866
DrugCell	KYSE-140	8	Aerodigestive Tract	139.424
DrugCell	HPAF-II	8	Pancreas	51.864
DrugCell	TE-6	7	Aerodigestive Tract	27.2512
DrugCell	SW1088	6	Nervous System	59.9813
DrugCell	HCC-827	10	Lung (NSCLC)	145.608
DrugCell	HCC1806	12	Breast	47.9198
DrugCell	HCC-15	10	Lung (NSCLC)	76.2595
DrugCell	RERF-LC-MS	17	Lung (NSCLC)	305.64
DrugCell	COLO-684	7	Urogenital System	53.7562
DrugCell	CAL-85-1	6	Breast	31.7881
DrugCell	L-428	12	Lymphoma	66.6043
DrugCell	BCPAP	7	Thyroid	123.199
DrugCell	RD	9	Soft Tissue	53.8044
DrugCell	TT2609-C02	2	Thyroid	40.576
DrugCell	SW1271	4	Lung (SCLC)	53.1964
DrugCell	OVISE	12	Urogenital System	161.62
DrugCell	SK-MEL-24	12	Skin	39.599
DrugCell	A2780	15	Urogenital System	124.558
DrugCell	SW1417	5	Large Intestine	115.526
DrugCell	KMS-11	14	Myeloma	112.146
DrugCell	NCI-H69	6	Lung (SCLC)	131.206
DrugCell	MEL-HO	11	Skin	80.6528
DrugCell	RERF-LC-KJ	7	Lung (NSCLC)	221.765
DrugCell	ME-1	12	Leukemia	120.811
DrugCell	LOUCY	15	Leukemia	69.7141
DrugCell	NCI-H1623	7	Lung (NSCLC)	46.8574
DrugCell	COLO-800	11	Skin	70.14
DrugCell	A704	11	Kidney	100.793
DrugCell	NCI-H1568	4	Lung (NSCLC)	59.3062
DrugCell	NCI-H2196	3	Lung (SCLC)	30.4066
DrugCell	CL-11	6	Large Intestine	184.832
DrugCell	SF295	6	Nervous System	79.2914
DrugCell	TGBC11TKB	8	Digestive System	115.282
DrugCell	TE-9	5	Aerodigestive Tract	288.807
DrugCell	SJSA-1	10	Bone	64.9992
DrugCell	SIG-M5	13	Leukemia	140.388
DrugCell	SU-DHL-1	8	Lymphoma	257.507
DrugCell	MKN45	11	Digestive System	70.5716
DrugCell	COLO-829	4	Skin	483.211
DrugCell	HCC-366	8	Lung (NSCLC)	31.9416
DrugCell	RKN	3	Urogenital System	71.9253
DrugCell	AM-38	11	Nervous System	119.509
DrugCell	FU97	7	Digestive System	77.914
DrugCell	Mewo	4	Skin	34.89
DrugCell	NCI-H2228	5	Lung (NSCLC)	83.4064
DrugCell	LN-229	3	Nervous System	7.56088
DrugCell	PSN1	9	Pancreas	119.314
DrugCell	MDA-MB-231	11	Breast	45.7683
DrugCell	ML-1	3	Thyroid	77.8767
DrugCell	NCI-H2342	3	Lung (NSCLC)	70.1371
DrugCell	NCI-H2291	3	Lung (NSCLC)	30.195
DrugCell	NCI-H2087	10	Lung (NSCLC)	194.369
DrugCell	SW837	5	Large Intestine	36.4291
DrugCell	SK-N-FI	5	Neuroblastoma	58.3904
DrugCell	DMS-79	5	Lung (SCLC)	40.1275
DrugCell	HOP-62	3	Lung (NSCLC)	35.6006
DrugCell	TE-441-T	10	Soft Tissue	50.8801
DrugCell	LS-513	9	Large Intestine	438.636
DrugCell	TCCSUP	9	Urogenital System	39.0264
DrugCell	NCI-H1793	5	Lung (NSCLC)	102.976
DrugCell	J82	4	Urogenital System	45.3138
DrugCell	NCI-H596	7	Lung (NSCLC)	739.951
DrugCell	HH	3	Leukemia	55.6092
DrugCell	C2BBe1	6	Large Intestine	57.726
DrugCell	BT-549	12	Breast	78.1487
DrugCell	CAL-62	8	Thyroid	63.4224
DrugCell	OVTOKO	6	Urogenital System	48.2314
DrugCell	KYSE-520	8	Aerodigestive Tract	60.5288
DrugCell	PANC-04-03	6	Pancreas	115.231
DrugCell	CAL-120	5	Breast	43.4907
DrugCell	NCI-H358	7	Lung (NSCLC)	26.0006
DrugCell	PANC-08-13	3	Pancreas	18.3705
DrugCell	DMS-114	11	Lung (SCLC)	479.913
DrugCell	SNB75	3	Nervous System	178.852
DrugCell	NCI-H1648	11	Lung (NSCLC)	140.602
DrugCell	A101D	12	Skin	96.3745
DrugCell	SK-CO-1	16	Large Intestine	109.032
DrugCell	NB1	4	Neuroblastoma	20.3
DrugCell	BHY	6	Aerodigestive Tract	54.1955
DrugCell	HuCCT1	9	Digestive System	34.3142
DrugCell	DAN-G	8	Pancreas	121.475
DrugCell	U-118-MG	9	Nervous System	47.7109
DrugCell	TE-5	4	Aerodigestive Tract	54.5532
DrugCell	NCI-H2172	2	Lung (NSCLC)	112.394
DrugCell	SK-MEL-31	3	Skin	16.2652
DrugCell	NCI-H1105	5	Lung (SCLC)	150.951
DrugCell	MFE-296	4	Urogenital System	147.34
DrugCell	SW1573	2	Lung (NSCLC)	51.9296
DrugCell	PA-TU-8988T	11	Pancreas	90.6928
DrugCell	SK-MEL-28	8	Skin	47.803
DrugCell	HT-1080	7	Soft Tissue	38.804
DrugCell	SK-MEL-3	11	Skin	367.501
DrugCell	NCI-H727	3	Lung (NSCLC)	159.367
DrugCell	HCC1143	8	Breast	79.9462
DrugCell	RT4	6	Urogenital System	43.3655
DrugCell	NCI-H1792	12	Lung (NSCLC)	163.854
DrugCell	DBTRG-05MG	4	Nervous System	69.5076
DrugCell	OCUM-1	9	Digestive System	42.283
DrugCell	HT-1197	6	Urogenital System	343.016
DrugCell	NCI-H2009	8	Lung (NSCLC)	32.4648
DrugCell	RMG-I	4	Urogenital System	567.012
DrugCell	HCC1937	2	Breast	49.725
DrugCell	HCC1599	10	Breast	123.569
DrugCell	U-2-OS	9	Bone	106.058
DrugCell	C32	8	Skin	55.4726
DrugCell	UACC-893	7	Breast	80.9677
DrugCell	UACC-62	15	Skin	205.857
DrugCell	SUIT-2	3	Pancreas	31.5893
DrugCell	NCI-H650	3	Lung (NSCLC)	88.5447
DrugCell	KU-19-19	12	Urogenital System	82.4358
DrugCell	TYK-nu	4	Urogenital System	277.489
DrugCell	HuH-7	3	Digestive System	74.9991
DrugCell	SW780	3	Urogenital System	22.9568
DrugCell	SNU-C1	6	Large Intestine	77.2835
DrugCell	SK-MEL-5	9	Skin	123.117
DrugCell	OV-90	5	Urogenital System	85.8215
DrugCell	UACC-257	8	Skin	111.872
DrugCell	NCI-H2452	4	Lung	188.177
DrugCell	PANC-10-05	7	Pancreas	80.5582
DrugCell	BxPC-3	10	Pancreas	113.811
DrugCell	MDST8	11	Large Intestine	46.0011
DrugCell	COR-L88	3	Lung (SCLC)	259.67
DrugCell	NCI-H2085	3	Lung (NSCLC)	65.5933
DrugCell	NCI-H2052	2	Lung	126.36
DrugCell	Calu-3	3	Lung (NSCLC)	100.818
DrugCell	OV-56	3	Urogenital System	177.946
DrugCell	SCC-25	1	Aerodigestive Tract	89.4224
DrugCell	BICR31	9	Aerodigestive Tract	171.93
DrugCell	NCI-H2029	4	Lung (SCLC)	18.4753
DrugCell	MDA-MB-436	7	Breast	34.6063
DrugCell	A204	3	Soft Tissue	72.0718
DrugCell	PC-3	5	Urogenital System	14.6242
DrugCell	COLO-783	7	Skin	62.3716
DrugCell	NCI-H2405	9	Lung (NSCLC)	62.4244
DrugCell	HCC2218	5	Breast	29.0263
DrugCell	COLO-678	3	Large Intestine	68.9523
DrugCell	NCI-H1435	2	Lung (NSCLC)	41.5432
DrugCell	T-T	6	Aerodigestive Tract	105.758
DrugCell	ChaGo-K-1	5	Lung (NSCLC)	168.556
DrugCell	GB-1	5	Nervous System	59.5259
DrugCell	YAPC	2	Pancreas	120.862
DrugCell	OAW-28	3	Urogenital System	25.4751
DrugCell	HPAC	8	Pancreas	67.081
DrugCell	U-87-MG	4	Nervous System	83.9973
DrugCell	QGP-1	4	Pancreas	51.8485
DrugCell	SW1990	4	Pancreas	104.729
DrugCell	RCC10RGB	1	Kidney	78.4141
DrugCell	SW1710	2	Urogenital System	14.5848
DrugCell	COR-L95	4	Lung (SCLC)	119.294
DrugCell	EFM-19	4	Breast	35.8012
DrugCell	KYSE-70	3	Aerodigestive Tract	159.43
DrugCell	SK-MEL-1	5	Skin	140.785
DrugCell	HCC1428	2	Breast	158.983
DrugCell	VMRC-RCZ	2	Kidney	26.3718
DrugCell	RVH-421	2	Skin	37.3921
DrugCell	NCI-H2347	1	Lung (NSCLC)	36.9062
DrugCell	COLO-680N	1	Aerodigestive Tract	15.5563
DrugCell	DMS-53	3	Lung (SCLC)	37.8236
DrugCell	NCI-H1836	1	Lung (SCLC)	14.4446
DrugCell	OVKATE	1	Urogenital System	43.3777
DrugCell	IA-LM	2	Lung (NSCLC)	24.1552
